# Supplementary material for: Convergence of monosynaptic and polysynaptic sensory paths onto common motor outputs in a Drosophila feeding connectome
Source: PubMed Central journal article supplement (PMC6289573; doi:10.7554/elife.40247), 2018-12-11
Supplement: elife-40247-supp1.pdf [file elife-40247-supp1.pdf]

ID: 1367171  
 name: AN-L-Sens-B1-ACa-04

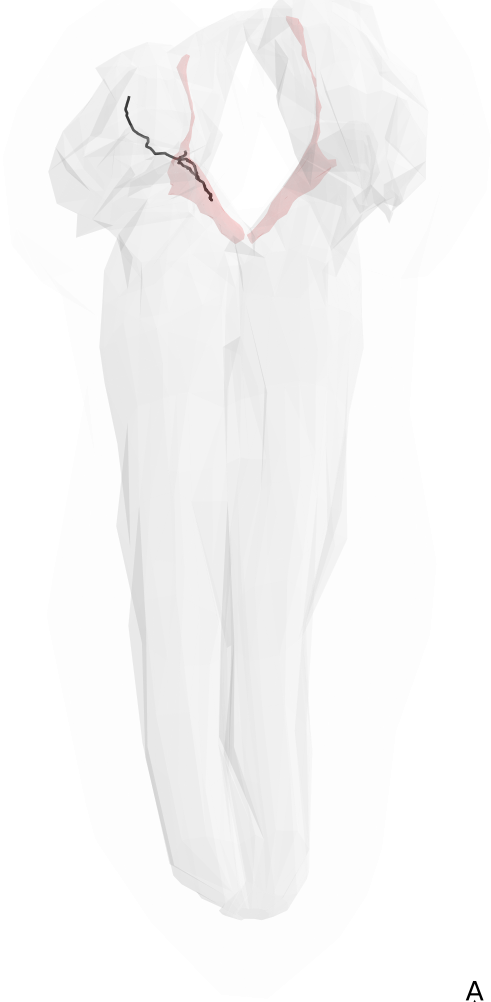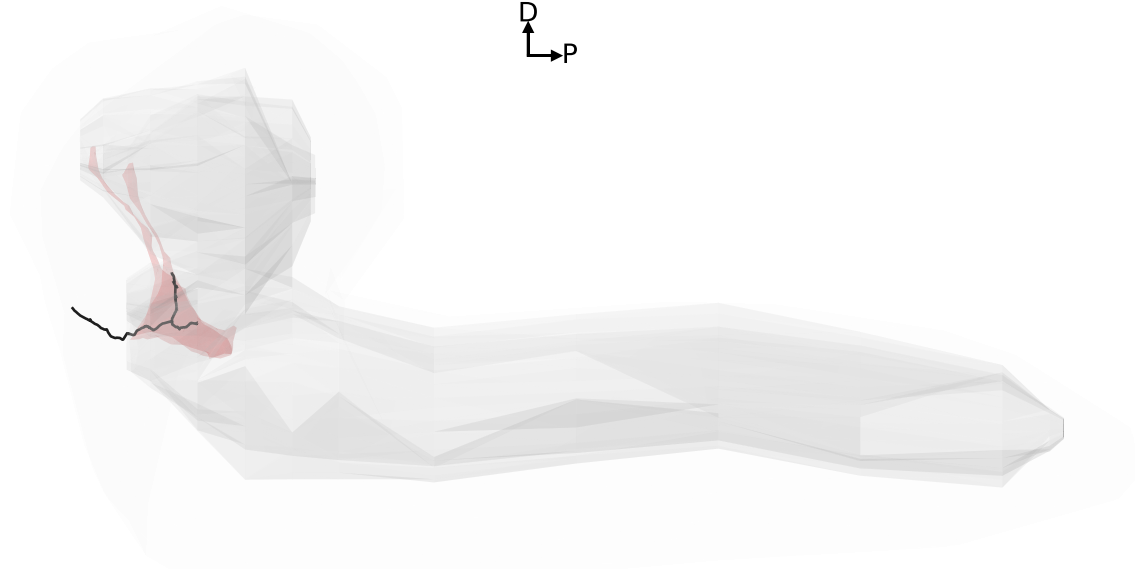

| <i>ID</i> | <i>name</i>         | SCACa | SCAVa | SCAVp | SCACal | SCACp | SCACpl | SCVM | IPCs | DMS | DH44 | Se0ens | Se0ph | PMN LR | MN motor neurons | PaN motor neurons | olfactory PNs | gustatory PNs | multiglomerular PNs | unknown PNs | thermo PNs | visual PNs |
|-----------|---------------------|-------|-------|-------|--------|-------|--------|------|------|-----|------|--------|-------|--------|------------------|-------------------|---------------|---------------|---------------------|-------------|------------|------------|
| 1367171   | AN-L-Sens-B1-ACa-04 | 2     | 0     | 0     | 0      | 0     | 0      | 0    | 0    | 1   | 17   | 3      | 0     | 0      | 0                | 0                 | 0             | 0             | 0                   | 0           | 0          | 0          |

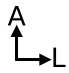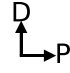

ID: 1398253  
 name: AN-L-Sens-B1-ACa-05

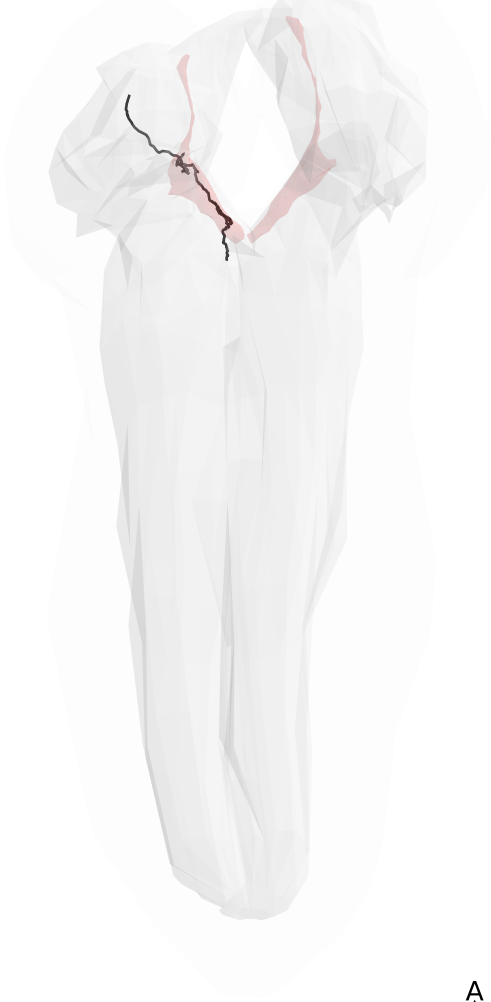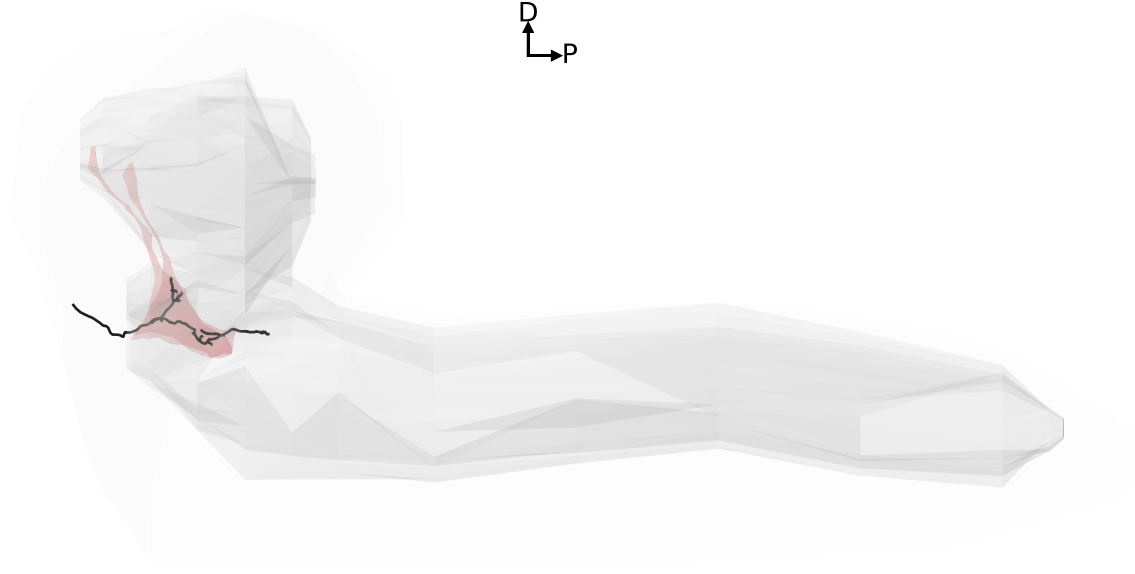

| <i>ID</i> | <i>name</i>         | SCACa | SCAVa | SCAVp | SCACal | SCACp | SCACpl | SCVM | IPCs | DMS | DH44 | Se0ens | Se0ph | PMN LR | MN motor neurons | PaN motor neurons | olfactory PNs | gustatory PNs | multiglomerular PNs | unknown PNs | thermo PNs | visual PNs |
|-----------|---------------------|-------|-------|-------|--------|-------|--------|------|------|-----|------|--------|-------|--------|------------------|-------------------|---------------|---------------|---------------------|-------------|------------|------------|
| 1398253   | AN-L-Sens-B1-ACa-05 | 0     | 0     | 0     | 0      | 0     | 0      | 0    | 1    | 0   | 1    | 0      | 0     | 0      | 0                | 0                 | 0             | 0             | 0                   | 0           | 0          | 0          |



ID: 1392771  
 name: AN-L-Sens-B1-ACa-06

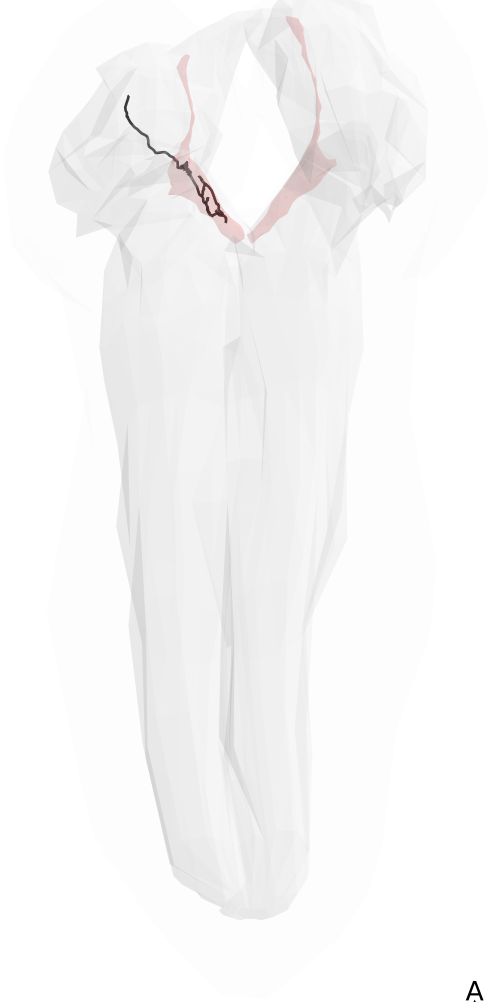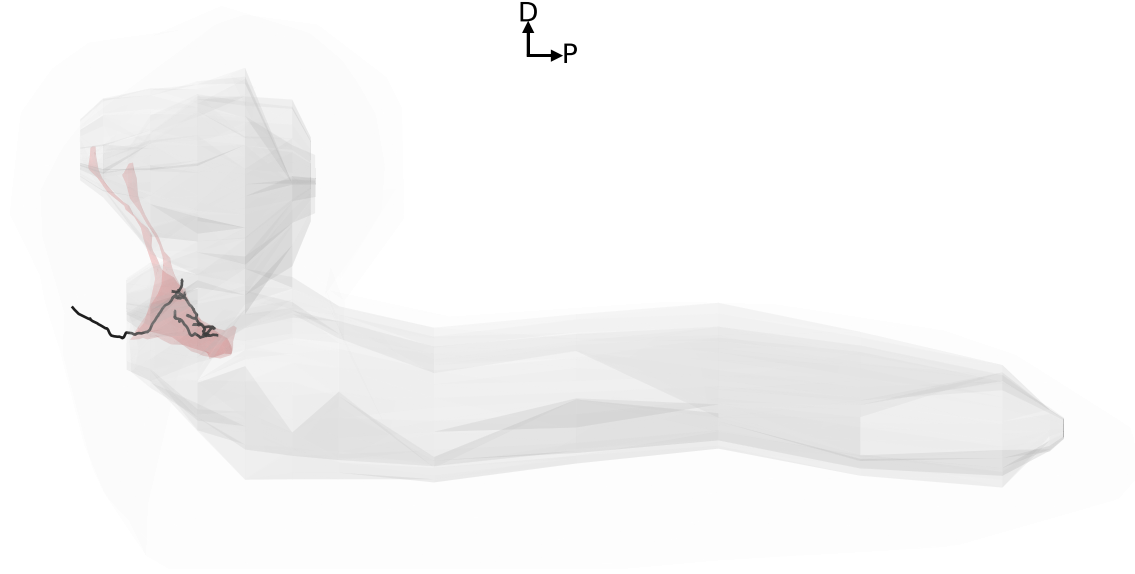

| <i>ID</i> | <i>name</i>         | SCACa | SCAVa | SCAVp | SCACal | SCACp | SCACpl | SCVM | IPCs | DMS | DH44 | Se0ens | Se0ph | PMN LR | MN motor neurons | PaN motor neurons | olfactory PNs | gustatory PNs | multiglomerular PNs | unknown PNs | thermo PNs | visual PNs |   |
|-----------|---------------------|-------|-------|-------|--------|-------|--------|------|------|-----|------|--------|-------|--------|------------------|-------------------|---------------|---------------|---------------------|-------------|------------|------------|---|
| 1392771   | AN-L-Sens-B1-ACa-06 | 0     | 0     | 0     | 0      | 0     | 0      | 0    | 0    | 0   | 0    | 0      | 0     | 0      | 0                | 0                 | 0             | 0             | 0                   | 0           | 0          | 0          | 0 |













ID: 1395971  
 name: AN-L-Sens-B1-ACa-11

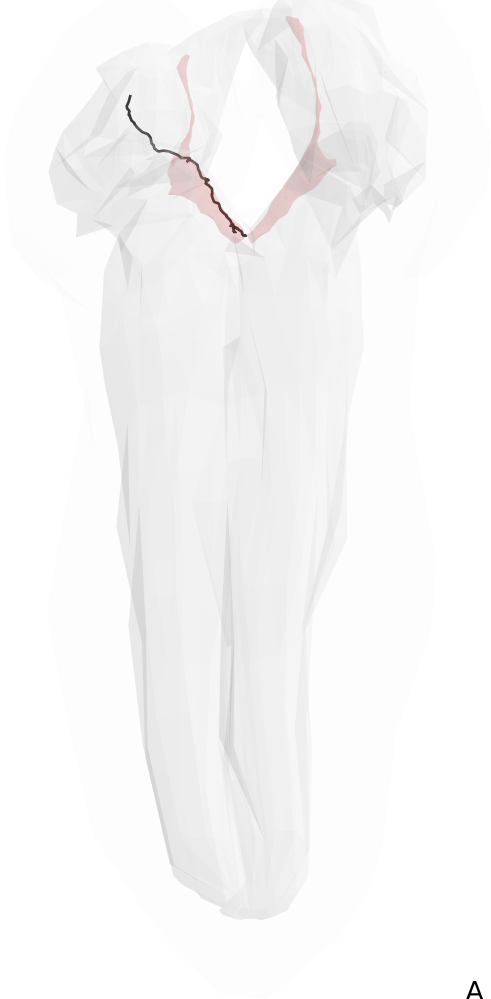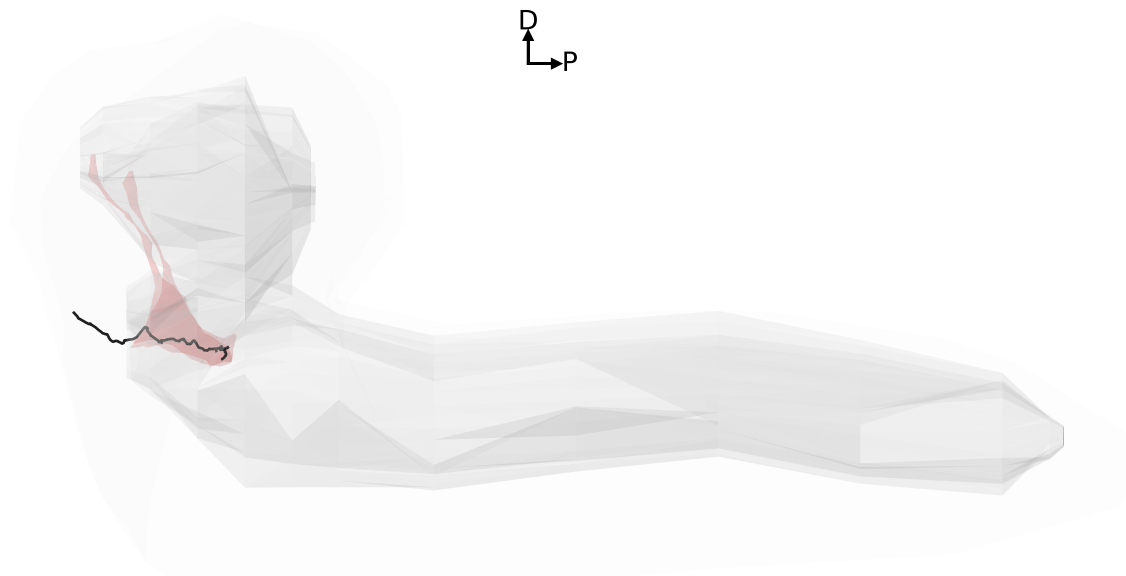

| <i>ID</i> | <i>name</i>         | SCACa | SCAVa | SCAVp | SCACal | SCACp | SCACpl | SCVM | IPCs | DMS | DH44 | Se0ens | Se0ph | PMN LR | MN motor neurons | PaN motor neurons | olfactory PNs | gustatory PNs | multiglomerular PNs | unknown PNs | thermo PNs | visual PNs |
|-----------|---------------------|-------|-------|-------|--------|-------|--------|------|------|-----|------|--------|-------|--------|------------------|-------------------|---------------|---------------|---------------------|-------------|------------|------------|
| 1395971   | AN-L-Sens-B1-ACa-11 | 4     | 0     | 0     | 0      | 0     | 0      | 0    | 1    | 4   | 0    | 2      | 0     | 0      | 0                | 0                 | 0             | 0             | 0                   | 0           | 0          | 0          |

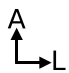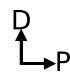







ID: 1391179  
 name: AN-L-Sens-B1-ACa-15

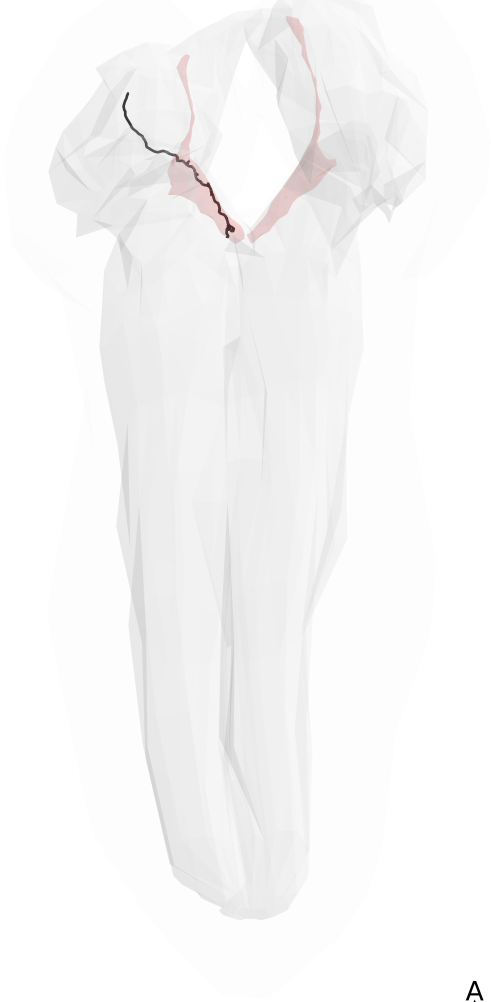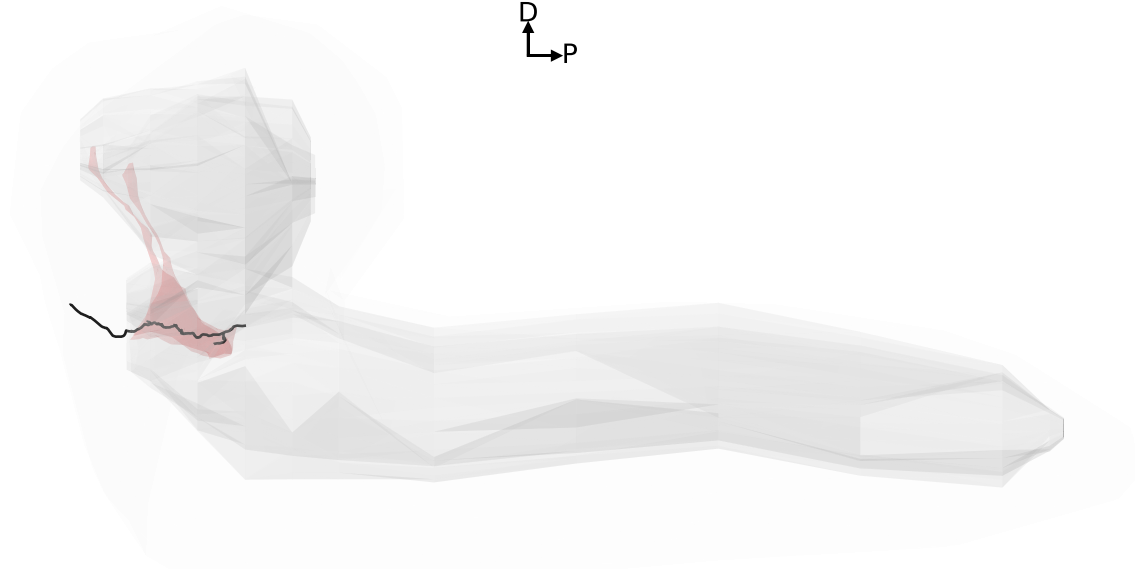

| <i>ID</i> | <i>name</i>         | SCACa | SCAVa | SCAVp | SCACal | SCACp | SCACpl | SCVM | IPCs | DMS | DH44 | Se0ens | Se0ph | PMN LR | MN motor neurons | PaN motor neurons | olfactory PNs | gustatory PNs | multiglomerular PNs | unknown PNs | thermo PNs | visual PNs |
|-----------|---------------------|-------|-------|-------|--------|-------|--------|------|------|-----|------|--------|-------|--------|------------------|-------------------|---------------|---------------|---------------------|-------------|------------|------------|
| 1391179   | AN-L-Sens-B1-ACa-15 | 3     | 0     | 0     | 0      | 0     | 0      | 0    | 0    | 0   | 6    | 0      | 0     | 0      | 0                | 0                 | 0             | 0             | 0                   | 0           | 0          | 0          |













ID: 15563553  
 name: AN-R-Sens-B1-ACa-05

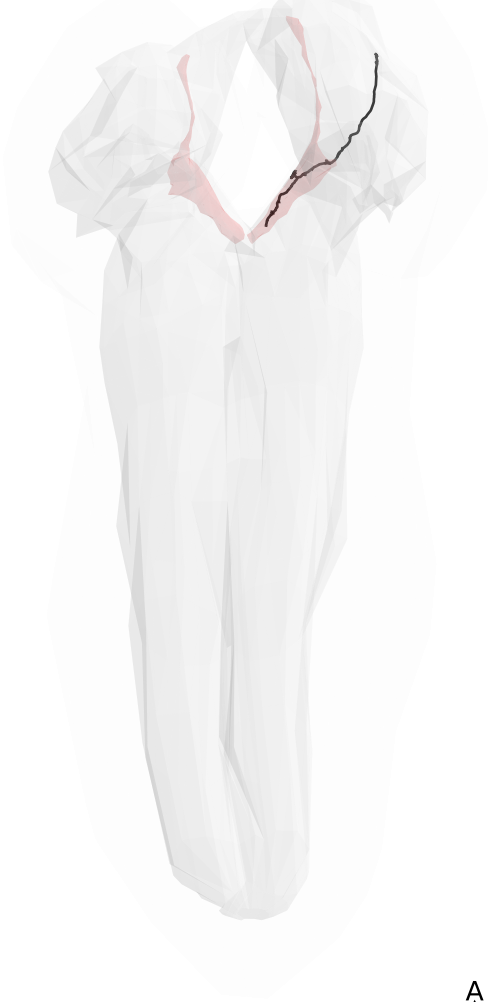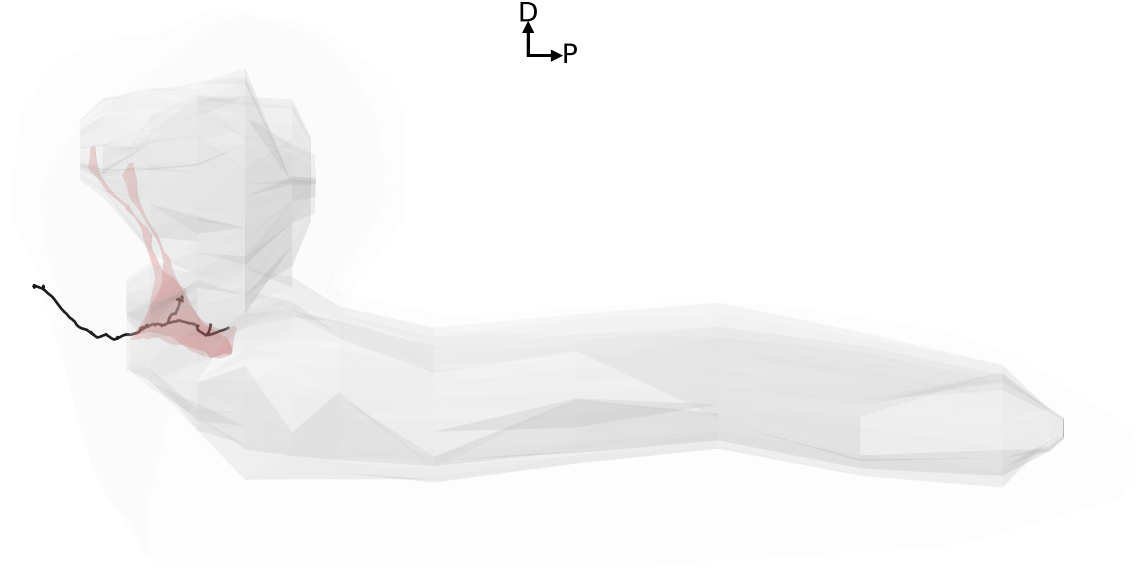

| <i>ID</i> | <i>name</i>         | SCACa | SCAVa | SCAVp | SCACal | SCACp | SCACpl | SCVM | IPCs | DMS | DH44 | Se0ens | Se0ph | PMN LR | MN motor neurons | PaN motor neurons | olfactory PNs | gustatory PNs | multiglomerular PNs | unknown PNs | thermo PNs | visual PNs |
|-----------|---------------------|-------|-------|-------|--------|-------|--------|------|------|-----|------|--------|-------|--------|------------------|-------------------|---------------|---------------|---------------------|-------------|------------|------------|
| 15563553  | AN-R-Sens-B1-ACa-05 | 0     | 0     | 0     | 0      | 0     | 0      | 0    | 1    | 0   | 0    | 2      | 0     | 0      | 0                | 0                 | 0             | 0             | 0                   | 0           | 0          | 0          |









ID: 15573396  
 name: AN-R-Sens-B1-ACa-09

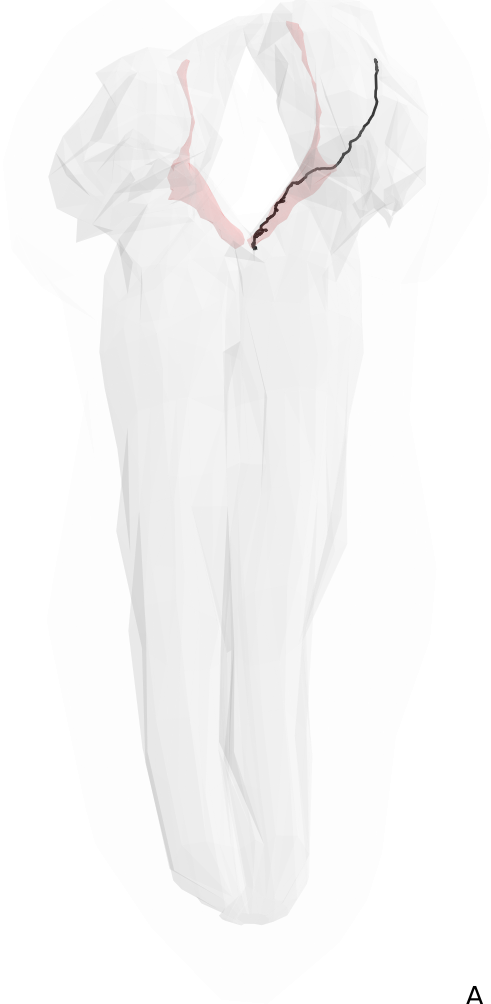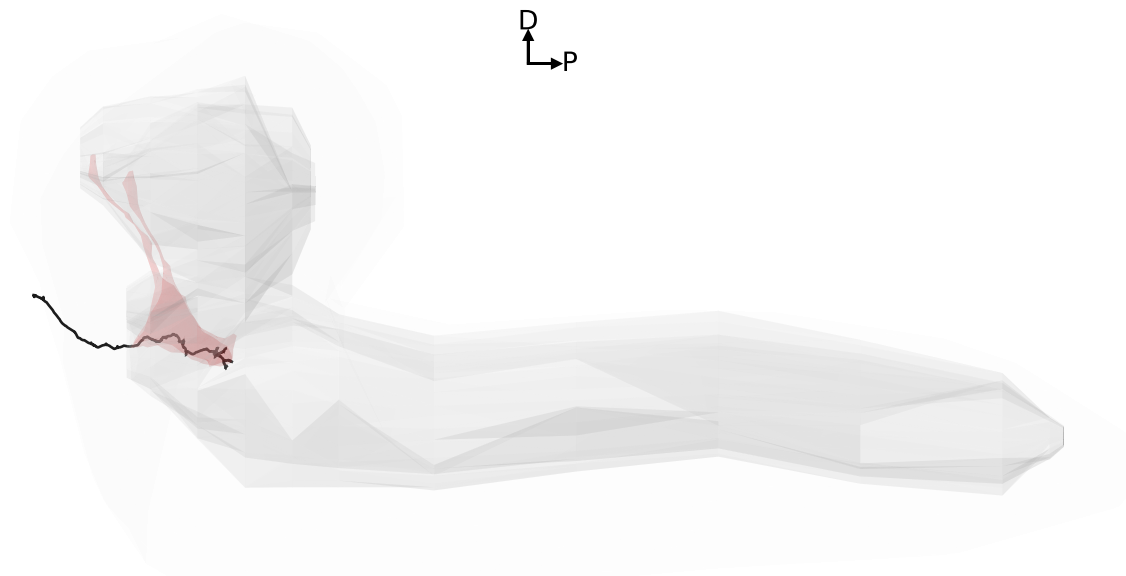

| <i>ID</i> | <i>name</i>         | SCACa | SCAVa | SCAVp | SCACal | SCACp | SCACpl | SCVM | IPCs | DMS | DH44 | Se0ens | Se0ph | PMN LR | MN motor neurons | PaN motor neurons | olfactory PNs | gustatory PNs | multiglomerular PNs | unknown PNs | thermo PNs | visual PNs |
|-----------|---------------------|-------|-------|-------|--------|-------|--------|------|------|-----|------|--------|-------|--------|------------------|-------------------|---------------|---------------|---------------------|-------------|------------|------------|
| 15573396  | AN-R-Sens-B1-ACa-09 | 6     | 0     | 0     | 0      | 0     | 0      | 0    | 0    | 5   | 0    | 0      | 0     | 0      | 0                | 0                 | 0             | 0             | 0                   | 0           | 0          | 0          |

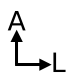







ID: 15573381  
 name: AN-R-Sens-B1-ACa-12

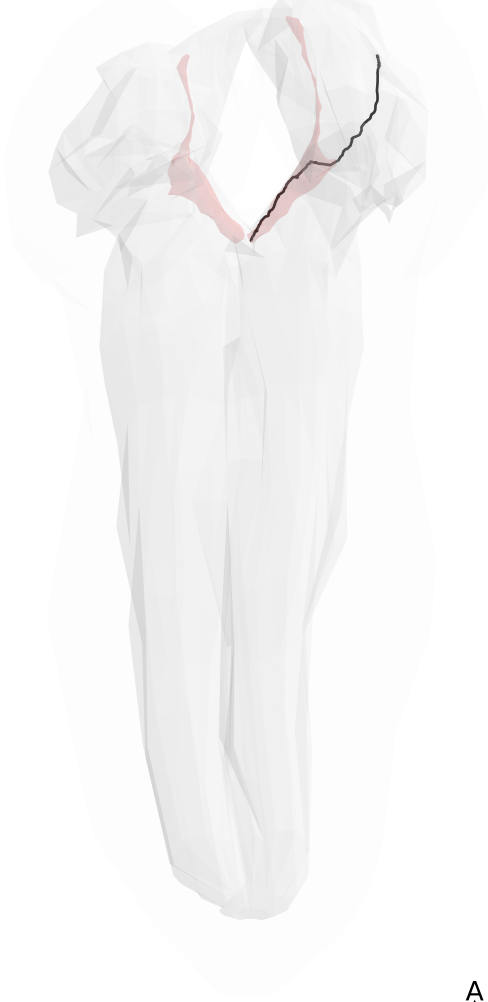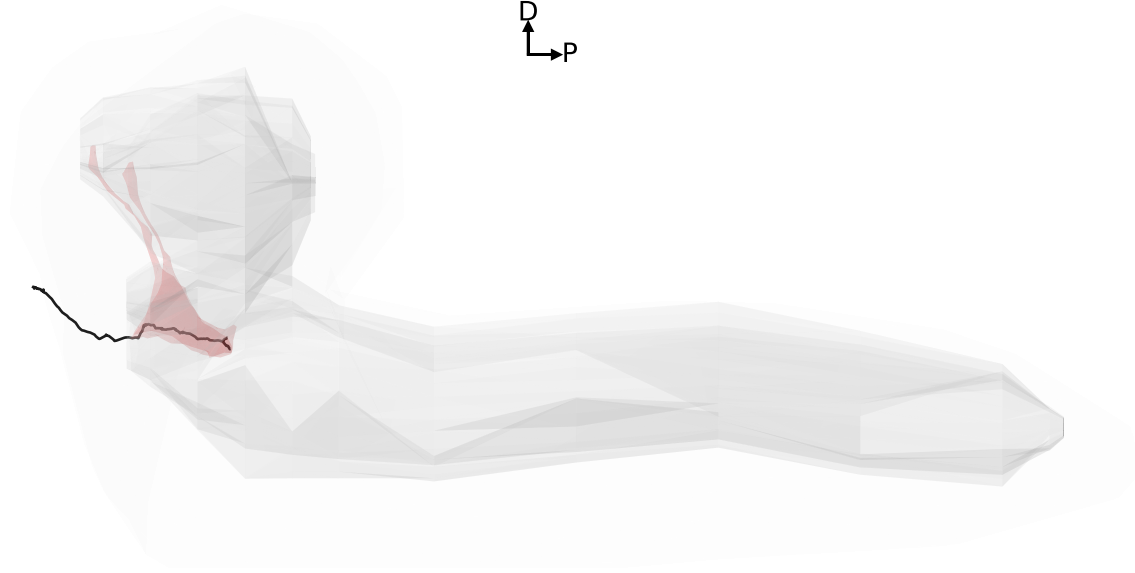

| <i>ID</i> | <i>name</i>         | SCACa | SCAVa | SCAVp | SCACal | SCACp | SCACpl | SCVM | IPCs | DMS | DH44 | Se0ens | Se0ph | PMN LR | MN motor neurons | PaN motor neurons | olfactory PNs | gustatory PNs | multiglomerular PNs | unknown PNs | thermo PNs | visual PNs |
|-----------|---------------------|-------|-------|-------|--------|-------|--------|------|------|-----|------|--------|-------|--------|------------------|-------------------|---------------|---------------|---------------------|-------------|------------|------------|
| 15573381  | AN-R-Sens-B1-ACa-12 | 4     | 0     | 0     | 0      | 0     | 0      | 0    | 0    | 0   | 0    | 0      | 0     | 0      | 0                | 0                 | 0             | 0             | 0                   | 0           | 0          | 0          |

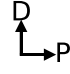





ID: 15548107  
 name: AN-R-Sens-B1-ACa-17

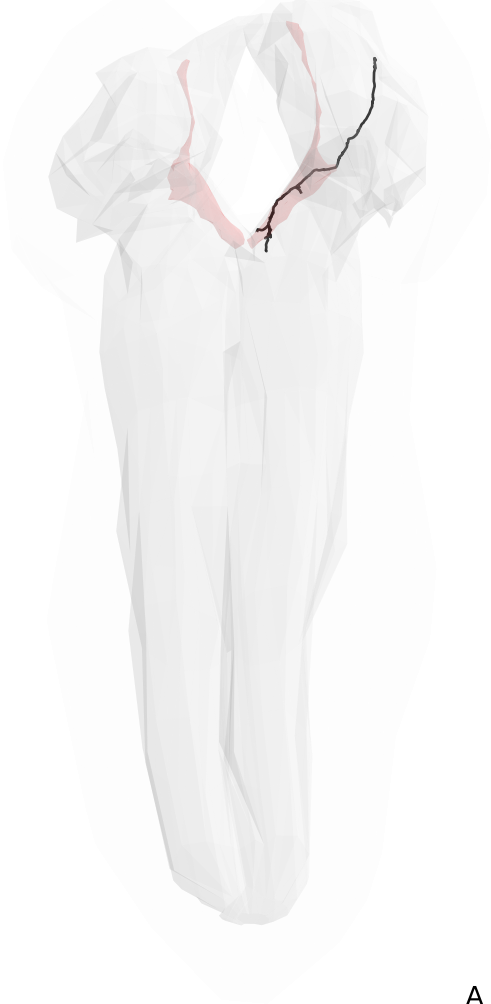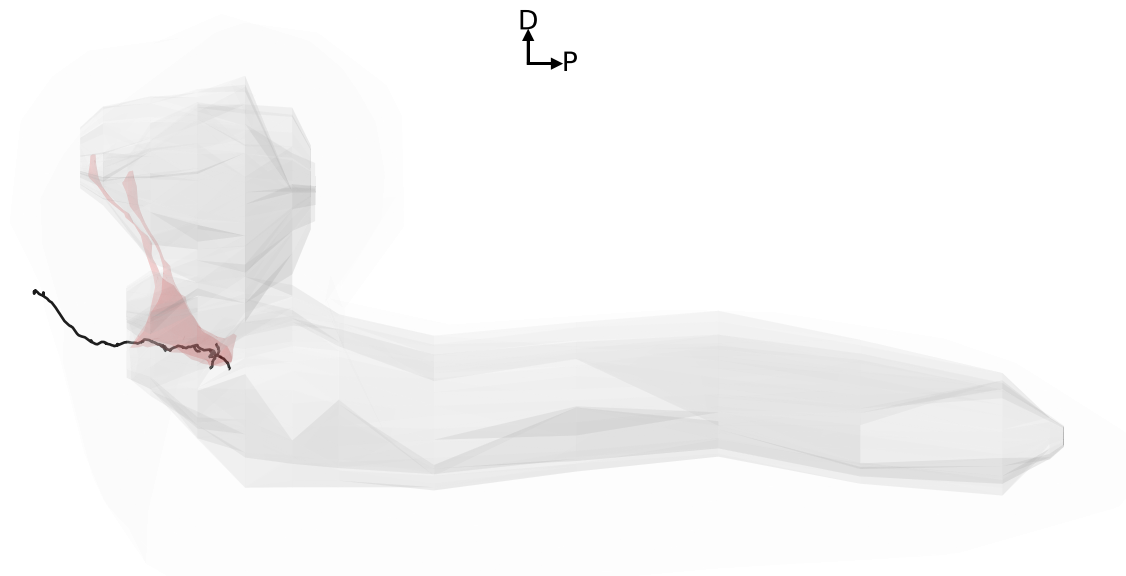

| <i>ID</i> | <i>name</i>         | SCACa | SCAVa | SCAVp | SCACal | SCACp | SCACpl | SCVM | IPCs | DMS | DH44 | Se0ens | Se0ph | PMN LR | MN motor neurons | PaN motor neurons | olfactory PNs | gustatory PNs | multiglomerular PNs | unknown PNs | thermo PNs | visual PNs |
|-----------|---------------------|-------|-------|-------|--------|-------|--------|------|------|-----|------|--------|-------|--------|------------------|-------------------|---------------|---------------|---------------------|-------------|------------|------------|
| 15548107  | AN-R-Sens-B1-ACa-17 | 2     | 1     | 0     | 0      | 0     | 0      | 0    | 0    | 1   | 0    | 3      | 0     | 0      | 0                | 0                 | 0             | 0             | 0                   | 0           | 0          | 0          |



ID: 1414206  
 name: AN-L-Sens-B1-AVa-16

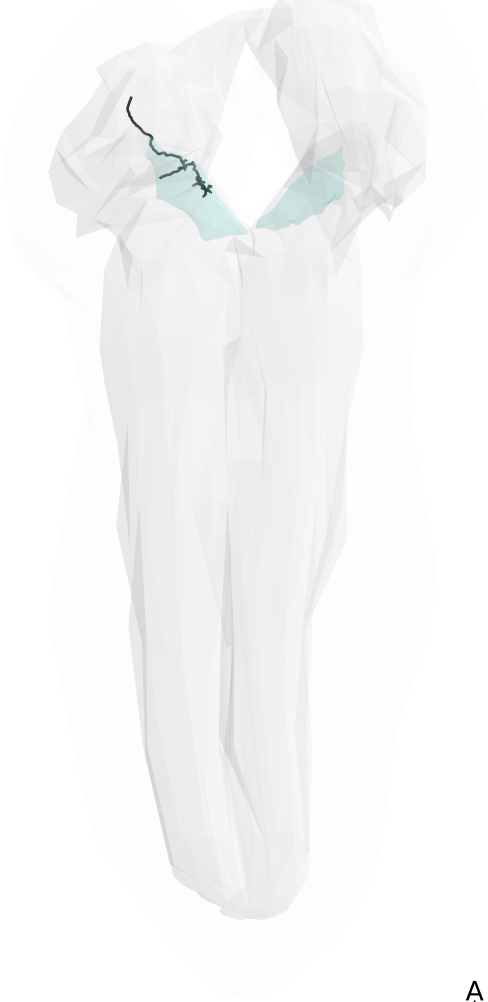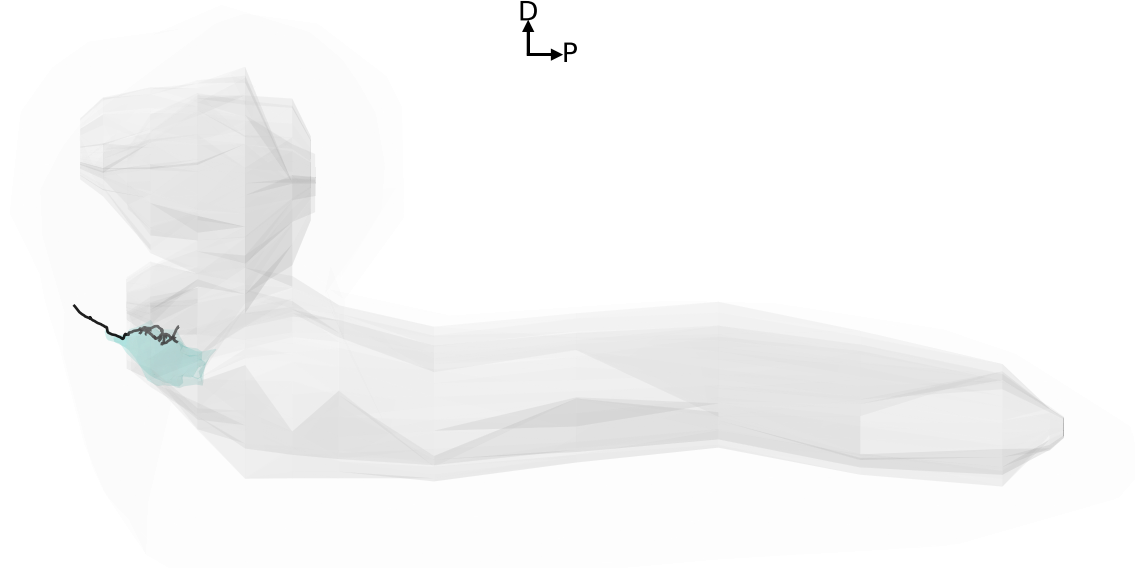

| <i>ID</i> | <i>name</i>         | SCACa | SCAVa | SCAVp | SCACal | SCACp | SCACpl | SCVM | IPCs | DMS | DH44 | Se0ens | Se0ph | PMN LR | MN motor neurons | PaN motor neurons | olfactory PNs | gustatory PNs | multiglomerular PNs | unknown PNs | thermo PNs | visual PNs |
|-----------|---------------------|-------|-------|-------|--------|-------|--------|------|------|-----|------|--------|-------|--------|------------------|-------------------|---------------|---------------|---------------------|-------------|------------|------------|
| 1414206   | AN-L-Sens-B1-AVa-16 | 2     | 4     | 0     | 0      | 2     | 0      | 0    | 3    | 0   | 0    | 20     | 0     | 0      | 0                | 0                 | 0             | 0             | 0                   | 0           | 0          | 0          |

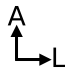



































ID: 1427012  
 name: AN-L-Sens-B1-AVa-32

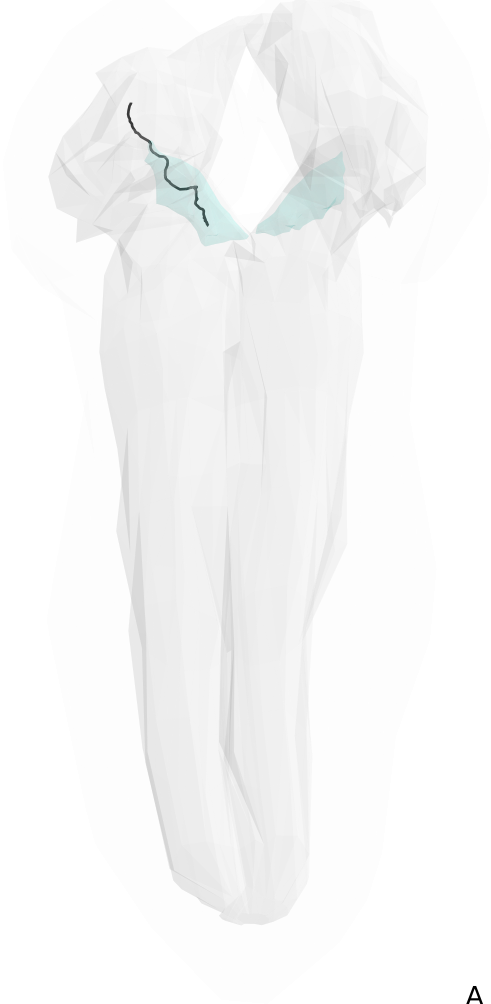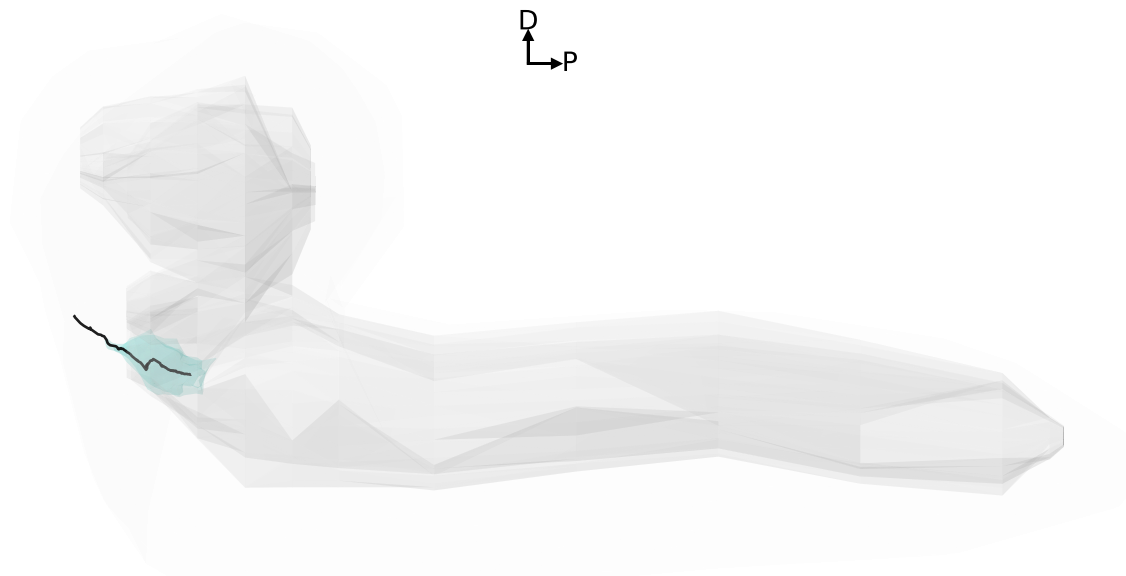

| <i>ID</i> | <i>name</i>         | SCACa | SCAVa | SCAVp | SCACal | SCACp | SCACpl | SCVM | IPCs | DMS | DH44 | Se0ens | Se0ph | PMN LR | MN motor neurons | PaN motor neurons | olfactory PNs | gustatory PNs | multiglomerular PNs | unknown PNs | thermo PNs | visual PNs |
|-----------|---------------------|-------|-------|-------|--------|-------|--------|------|------|-----|------|--------|-------|--------|------------------|-------------------|---------------|---------------|---------------------|-------------|------------|------------|
| 1427012   | AN-L-Sens-B1-AVa-32 | 0     | 3     | 0     | 0      | 0     | 0      | 0    | 0    | 0   | 0    | 0      | 0     | 1      | 0                | 0                 | 0             | 0             | 0                   | 0           | 0          | 0          |

























ID: 15998753  
 name: AN-L-Sens-B2-AVa-25

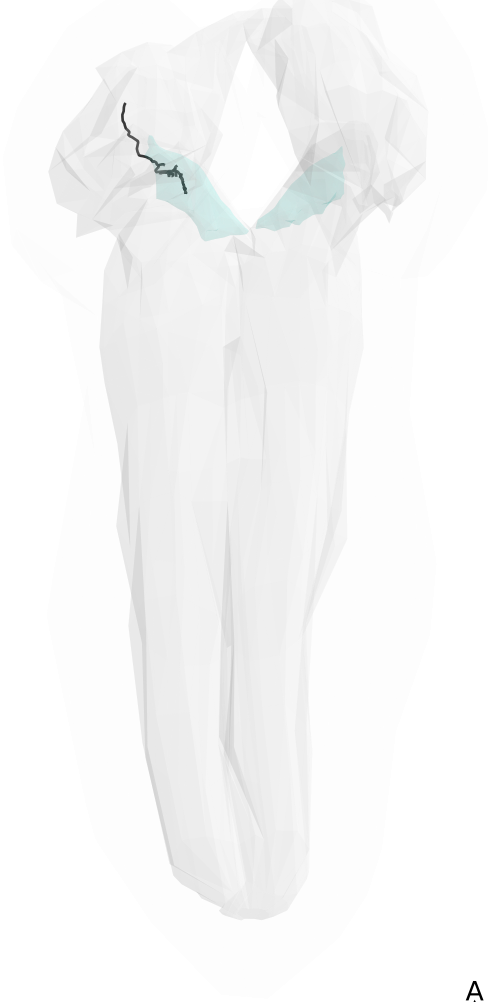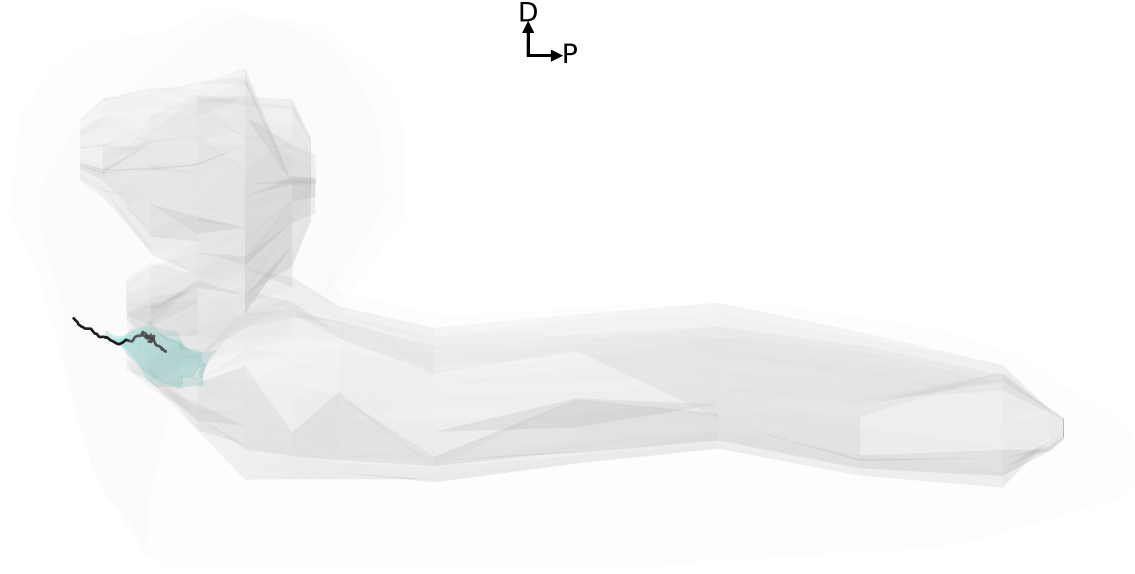

| <i>ID</i> | <i>name</i>         | SCACa | SCAVa | SCAVp | SCACal | SCACp | SCACpl | SCVM | IPCs | DMS | DH44 | Se0ens | Se0ph | PMN LR | MN motor neurons | PaN motor neurons | olfactory PNs | gustatory PNs | multiglomerular PNs | unknown PNs | thermo PNs | visual PNs |
|-----------|---------------------|-------|-------|-------|--------|-------|--------|------|------|-----|------|--------|-------|--------|------------------|-------------------|---------------|---------------|---------------------|-------------|------------|------------|
| 15998753  | AN-L-Sens-B2-AVa-25 | 0     | 2     | 0     | 0      | 0     | 0      | 0    | 0    | 0   | 0    | 0      | 0     | 0      | 0                | 0                 | 0             | 0             | 0                   | 0           | 0          | 0          |

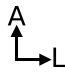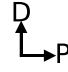









































































ID: 1347886  
 name: AN-L-Sens-B2-AVp-01

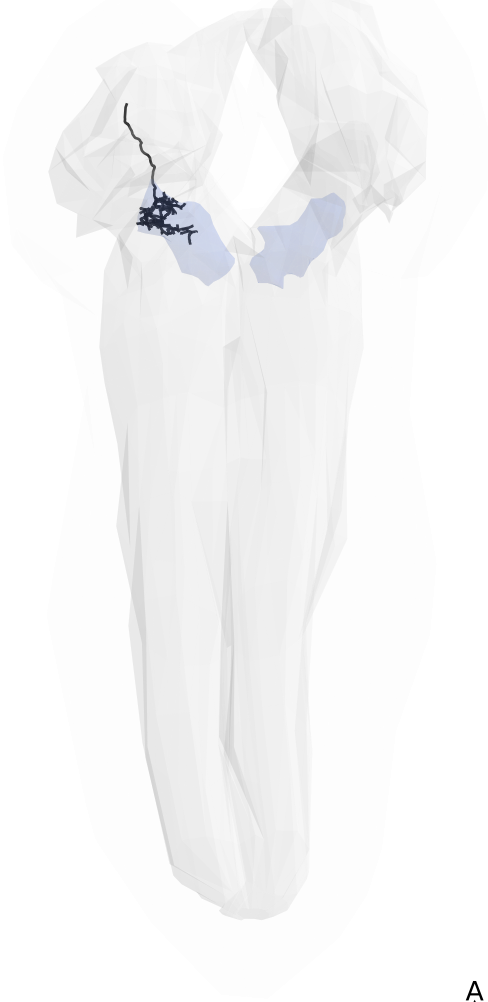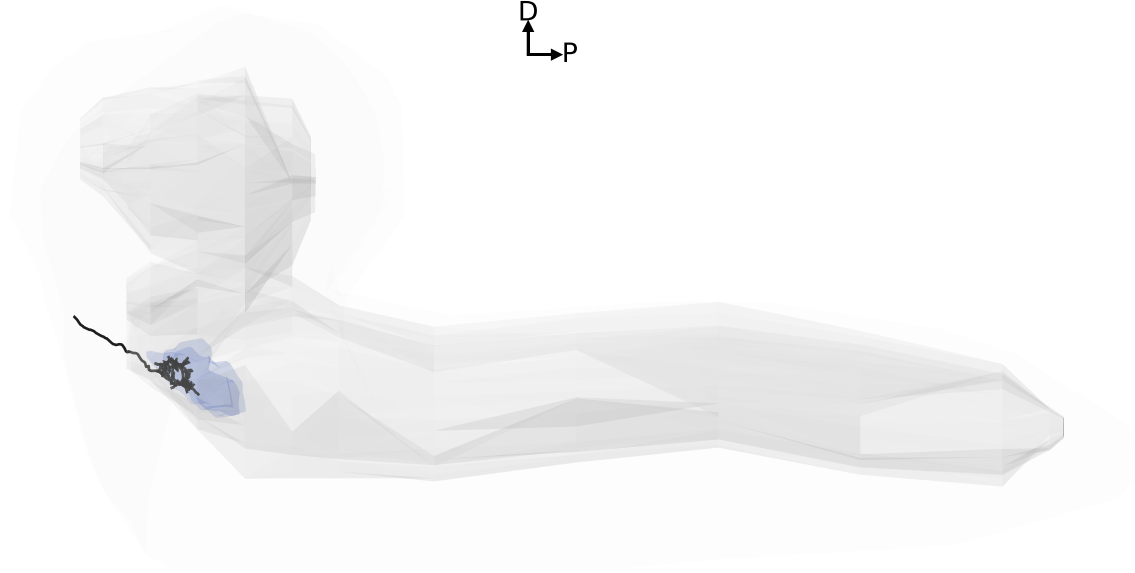

| <i>ID</i> | <i>name</i>         | SCACa | SCAVa | SCAVp | SCACal | SCACp | SCACpl | SCVM | IPCs | DMS | DH44 | Se0ens | Se0ph | PMN LR | MN motor neurons | PaN motor neurons | olfactory PNs | gustatory PNs | multiglomerular PNs | unknown PNs | thermo PNs | visual PNs |
|-----------|---------------------|-------|-------|-------|--------|-------|--------|------|------|-----|------|--------|-------|--------|------------------|-------------------|---------------|---------------|---------------------|-------------|------------|------------|
| 1347886   | AN-L-Sens-B2-AVp-01 | 0     | 1     | 0     | 0      | 0     | 0      | 0    | 0    | 0   | 0    | 0      | 7     | 6      | 1                | 0                 | 0             | 0             | 0                   | 0           | 0          | 0          |

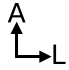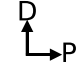











ID: 15505837  
 name: AN-R-Sens-B2-AVp-06

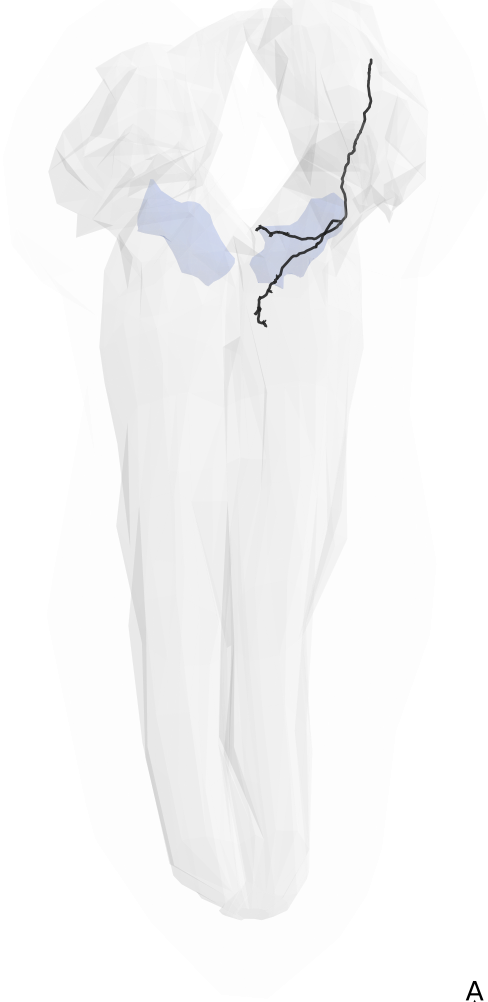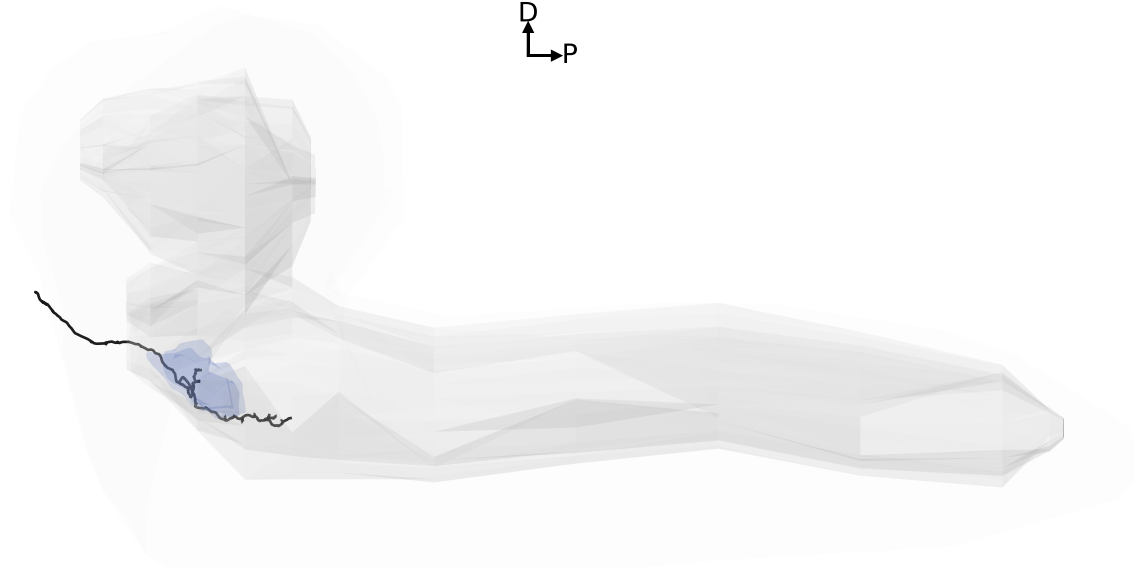

| <i>ID</i> | <i>name</i>         | SCACa | SCAVa | SCAVp | SCACal | SCACp | SCACpl | SCVM | IPCs | DMS | DH44 | Se0ens | Se0ph | PMN LR | MN motor neurons | PaN motor neurons | olfactory PNs | gustatory PNs | multiglomerular PNs | unknown PNs | thermo PNs | visual PNs |
|-----------|---------------------|-------|-------|-------|--------|-------|--------|------|------|-----|------|--------|-------|--------|------------------|-------------------|---------------|---------------|---------------------|-------------|------------|------------|
| 15505837  | AN-R-Sens-B2-AVp-06 | 0     | 0     | 1     | 0      | 0     | 0      | 2    | 0    | 0   | 0    | 0      | 1     | 4      | 0                | 0                 | 0             | 0             | 0                   | 0           | 0          | 0          |



























ID: 3608397  
 name: AN-L-Sens-B3-ACal-01

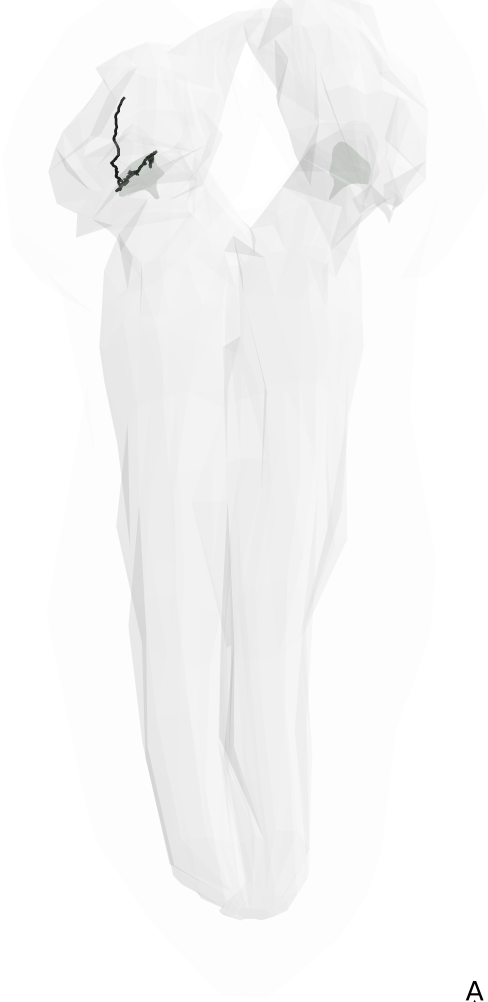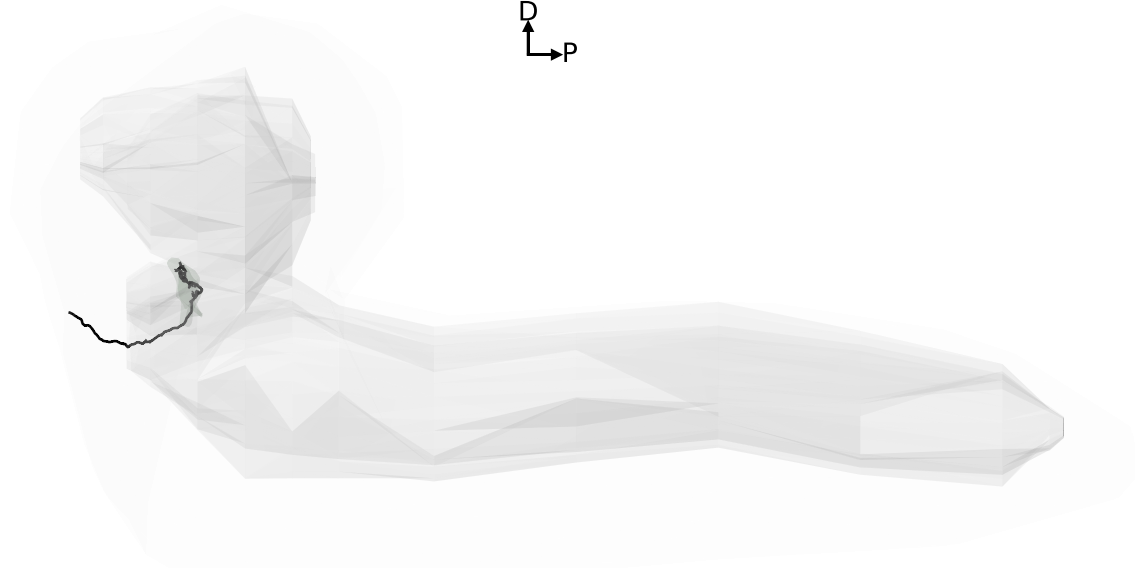

| <i>ID</i> | <i>name</i>          | SCACa | SCAVa | SCAVp | SCACal | SCACp | SCACpl | SCVM | IPCs | DMS | DH44 | Se0ens | Se0ph | PMN LR | MN motor neurons | PaN motor neurons | olfactory PNs | gustatory PNs | multiglomerular PNs | unknown PNs | thermo PNs | visual PNs |
|-----------|----------------------|-------|-------|-------|--------|-------|--------|------|------|-----|------|--------|-------|--------|------------------|-------------------|---------------|---------------|---------------------|-------------|------------|------------|
| 3608397   | AN-L-Sens-B3-ACal-01 | 0     | 0     | 0     | 0      | 0     | 0      | 0    | 0    | 0   | 0    | 0      | 0     | 0      | 0                | 0                 | 0             | 0             | 1                   | 0           | 12         | 0          |

ID: 3639968  
 name: AN-L-Sens-B3-ACal-02

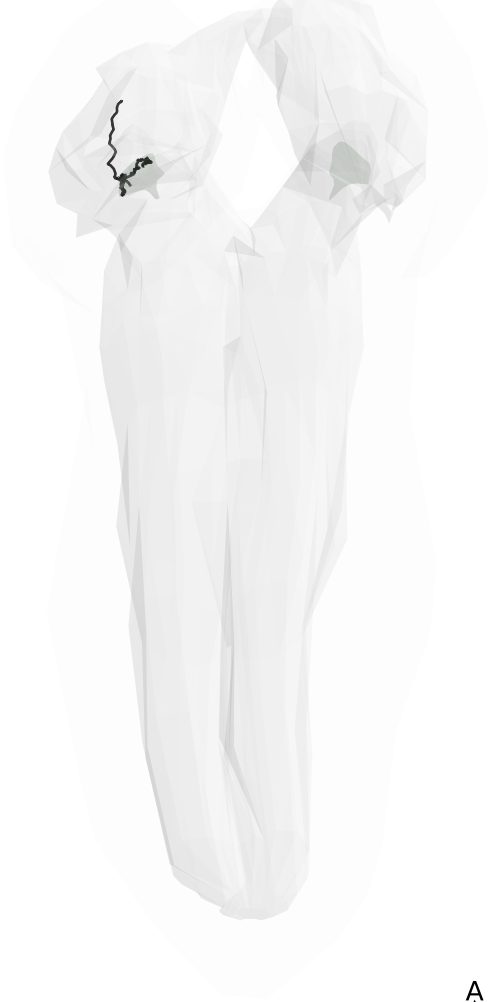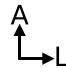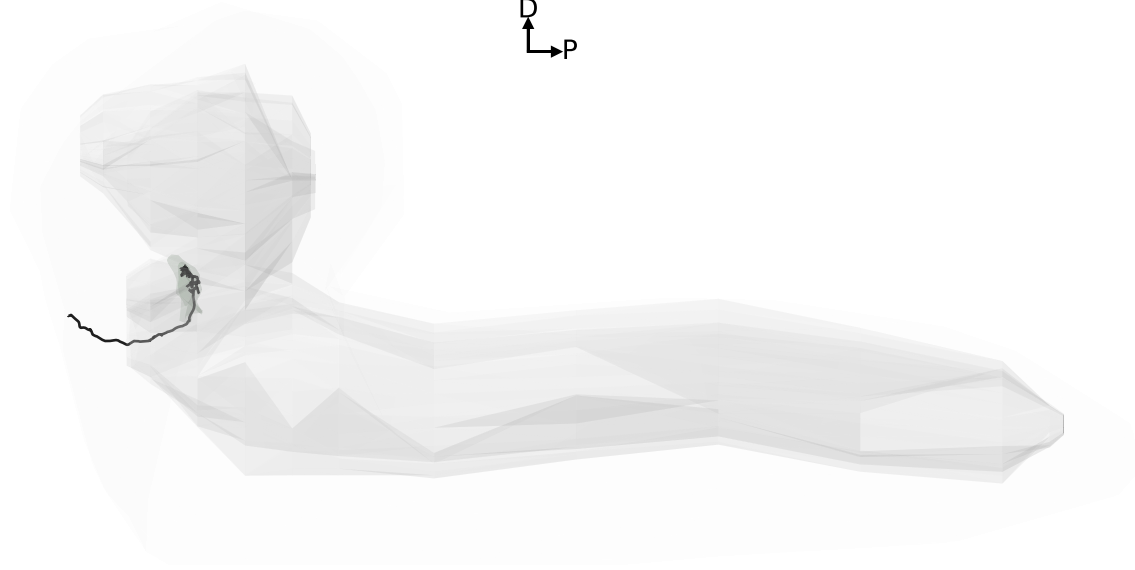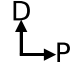

| <i>ID</i> | <i>name</i>          | SCACa | SCAVa | SCAVp | SCACal | SCACp | SCACpl | SCVM | IPCs | DMS | DH44 | Se0ens | Se0ph | PMN LR | MN motor neurons | PaN motor neurons | olfactory PNs | gustatory PNs | multiglomerular PNs | unknown PNs | thermo PNs | visual PNs |
|-----------|----------------------|-------|-------|-------|--------|-------|--------|------|------|-----|------|--------|-------|--------|------------------|-------------------|---------------|---------------|---------------------|-------------|------------|------------|
| 3639968   | AN-L-Sens-B3-ACal-02 | 0     | 0     | 0     | 2      | 0     | 0      | 0    | 0    | 0   | 0    | 0      | 0     | 0      | 0                | 0                 | 2             | 0             | 2                   | 0           | 131        | 0          |

ID: 3609202  
 name: AN-L-Sens-B3-ACal-03

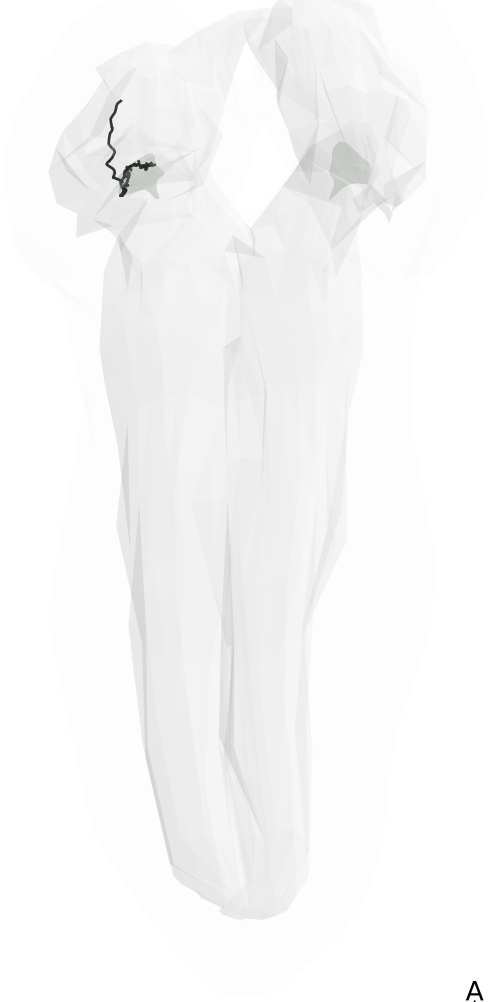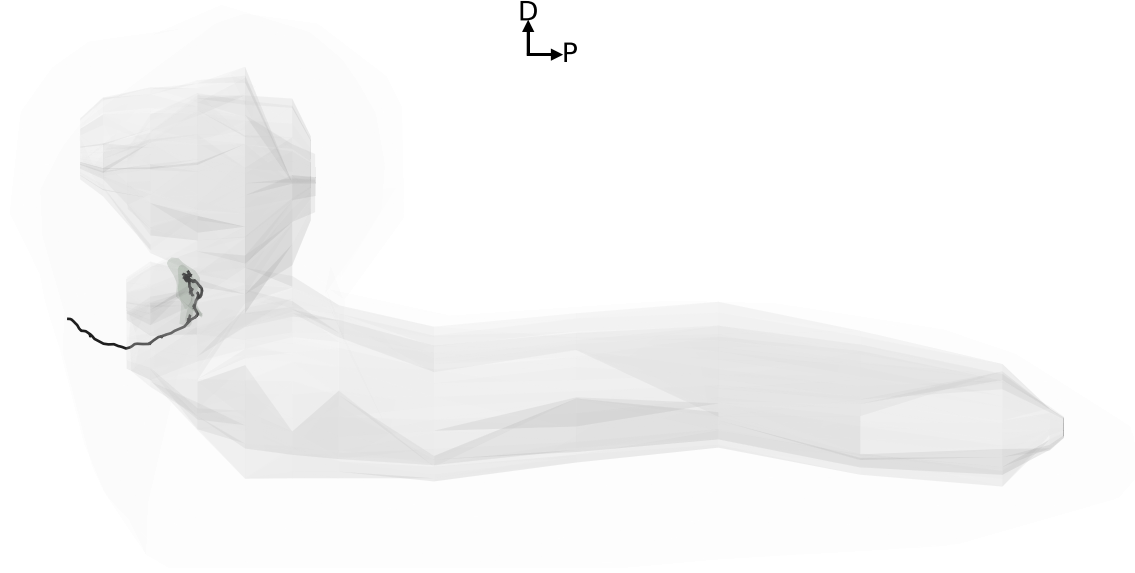

| <i>ID</i> | <i>name</i>          | SCACa | SCAVa | SCAVp | SCACal | SCACp | SCACpl | SCVM | IPCs | DMS | DH44 | Se0ens | Se0ph | PMN LR | MN motor neurons | PaN motor neurons | olfactory PNs | gustatory PNs | multiglomerular PNs | unknown PNs | thermo PNs | visual PNs |
|-----------|----------------------|-------|-------|-------|--------|-------|--------|------|------|-----|------|--------|-------|--------|------------------|-------------------|---------------|---------------|---------------------|-------------|------------|------------|
| 3609202   | AN-L-Sens-B3-ACal-03 | 0     | 0     | 0     | 0      | 0     | 0      | 0    | 0    | 0   | 0    | 0      | 0     | 0      | 0                | 0                 | 1             | 0             | 5                   | 0           | 13         | 0          |

ID: 5093516  
 name: AN-L-Sens-B3-ACal-04

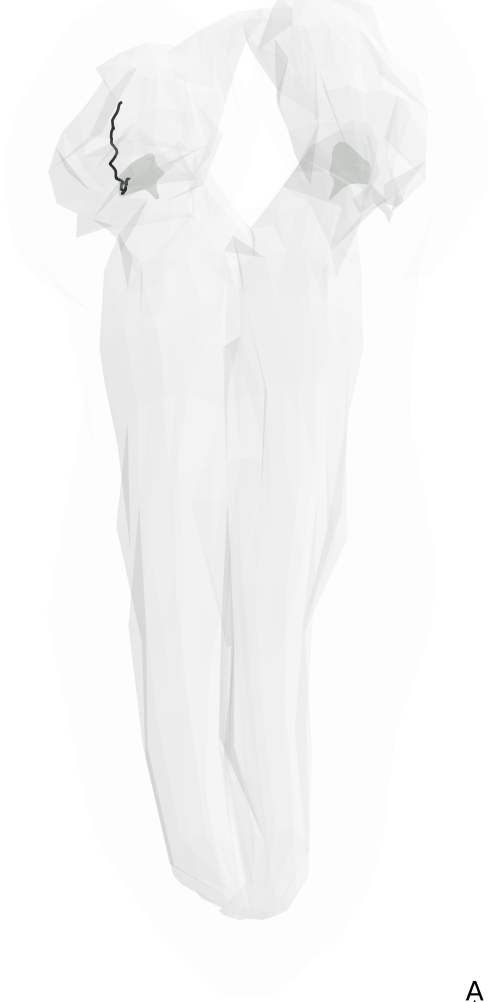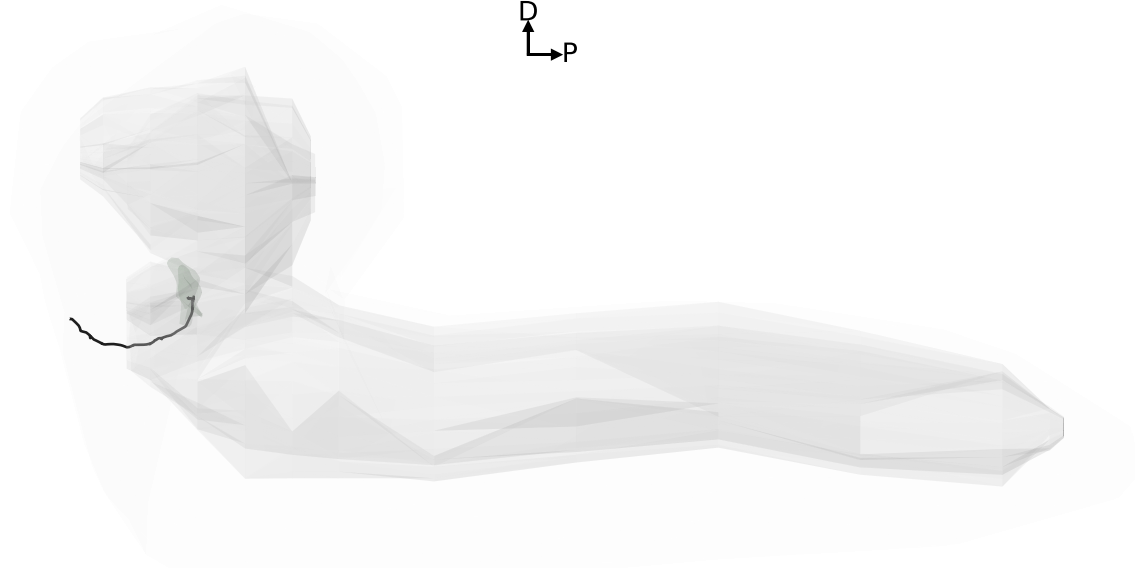

| <i>ID</i> | <i>name</i>          | SCACa | SCAVa | SCAVp | SCACal | SCACp | SCACpl | SCVM | IPCs | DMS | DH44 | Se0ens | Se0ph | PMN LR | MN motor neurons | PaN motor neurons | olfactory PNs | gustatory PNs | multiglomerular PNs | unknown PNs | thermo PNs | visual PNs |
|-----------|----------------------|-------|-------|-------|--------|-------|--------|------|------|-----|------|--------|-------|--------|------------------|-------------------|---------------|---------------|---------------------|-------------|------------|------------|
| 5093516   | AN-L-Sens-B3-ACal-04 | 0     | 0     | 0     | 0      | 0     | 0      | 0    | 0    | 0   | 0    | 0      | 0     | 0      | 0                | 0                 | 0             | 0             | 10                  | 0           | 0          | 0          |

ID: 2610744  
 name: AN-L-Sens-B3-ACal-05

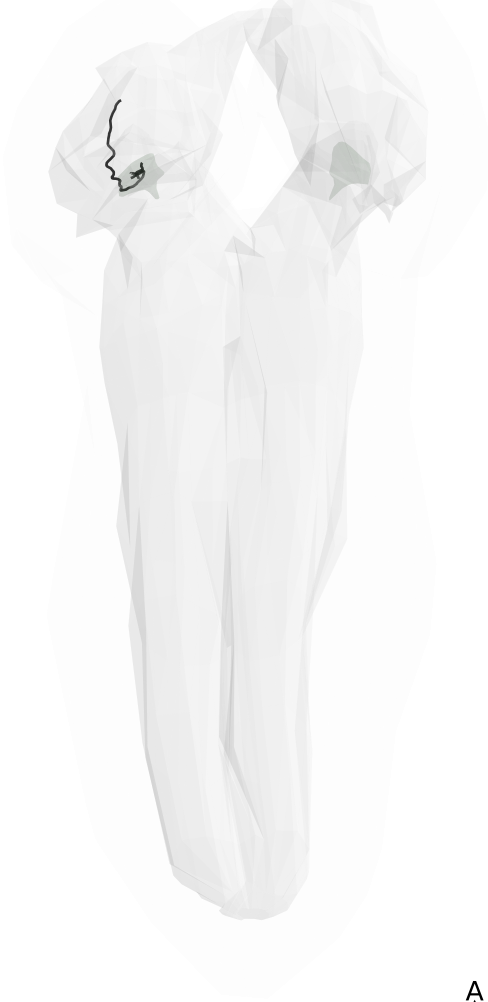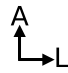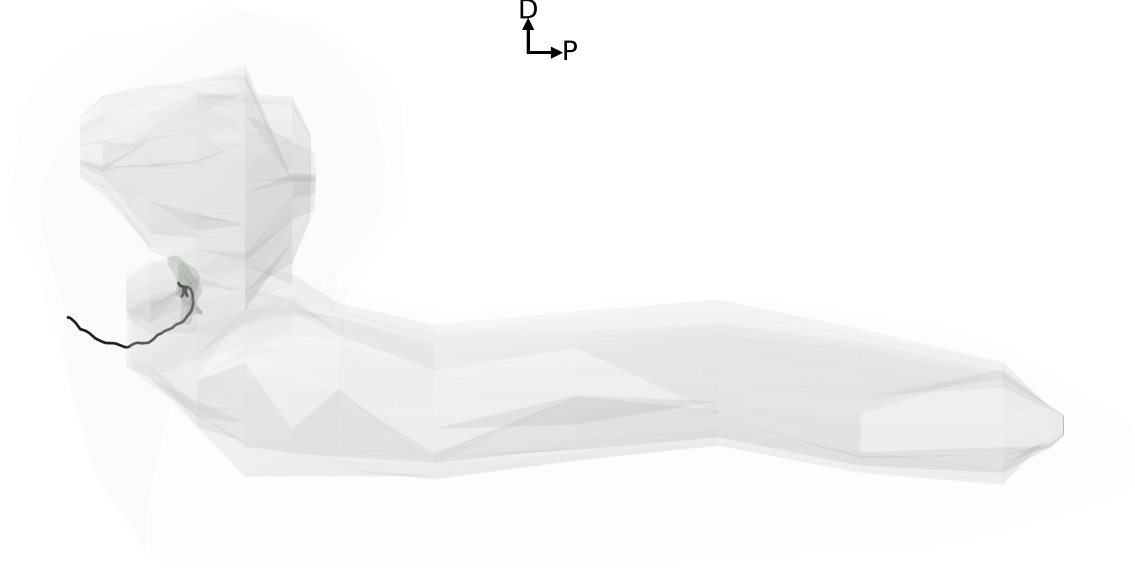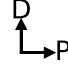

| <i>ID</i> | <i>name</i>          | SCACa | SCAVa | SCAVp | SCACal | SCACp | SCACpl | SCVM | IPCs | DMS | DH44 | Se0ens | Se0ph | PMN LR | MN motor neurons | PaN motor neurons | olfactory PNs | gustatory PNs | multiglomerular PNs | unknown PNs | thermo PNs | visual PNs |
|-----------|----------------------|-------|-------|-------|--------|-------|--------|------|------|-----|------|--------|-------|--------|------------------|-------------------|---------------|---------------|---------------------|-------------|------------|------------|
| 2610744   | AN-L-Sens-B3-ACal-05 | 0     | 0     | 0     | 0      | 0     | 0      | 0    | 0    | 0   | 0    | 0      | 0     | 0      | 0                | 0                 | 0             | 0             | 22                  | 0           | 0          | 0          |





ID: 3586984  
 name: AN-L-Sens-B3-ACal-07

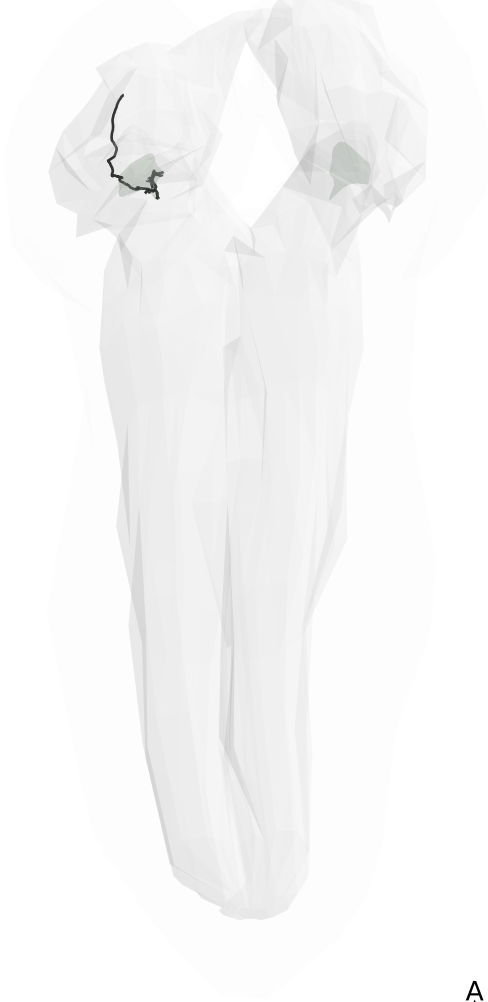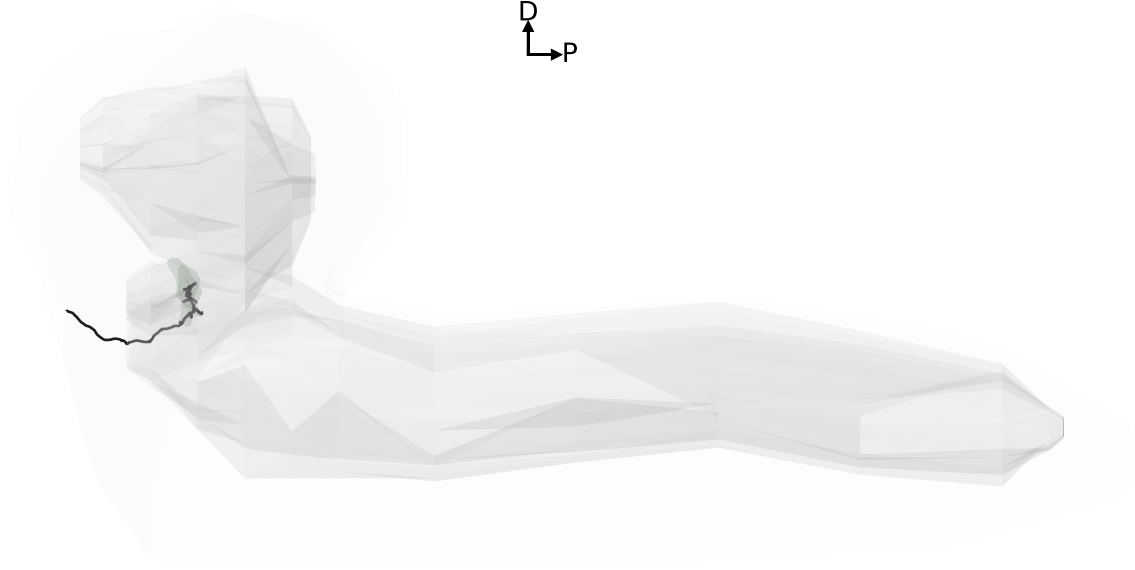

| <i>ID</i> | <i>name</i>          | SCACa | SCAVa | SCAVp | SCACal | SCACp | SCACpl | SCVM | IPCs | DMS | DH44 | Se0ens | Se0ph | PMN LR | MN motor neurons | PaN motor neurons | olfactory PNs | gustatory PNs | multiglomerular PNs | unknown PNs | thermo PNs | visual PNs |
|-----------|----------------------|-------|-------|-------|--------|-------|--------|------|------|-----|------|--------|-------|--------|------------------|-------------------|---------------|---------------|---------------------|-------------|------------|------------|
| 3586984   | AN-L-Sens-B3-ACal-07 | 0     | 0     | 0     | 0      | 1     | 0      | 0    | 0    | 0   | 0    | 0      | 0     | 0      | 0                | 0                 | 0             | 4             | 0                   | 0           | 0          | 0          |







ID: 4023881  
 name: AN-R-Sens-B3-ACal-04

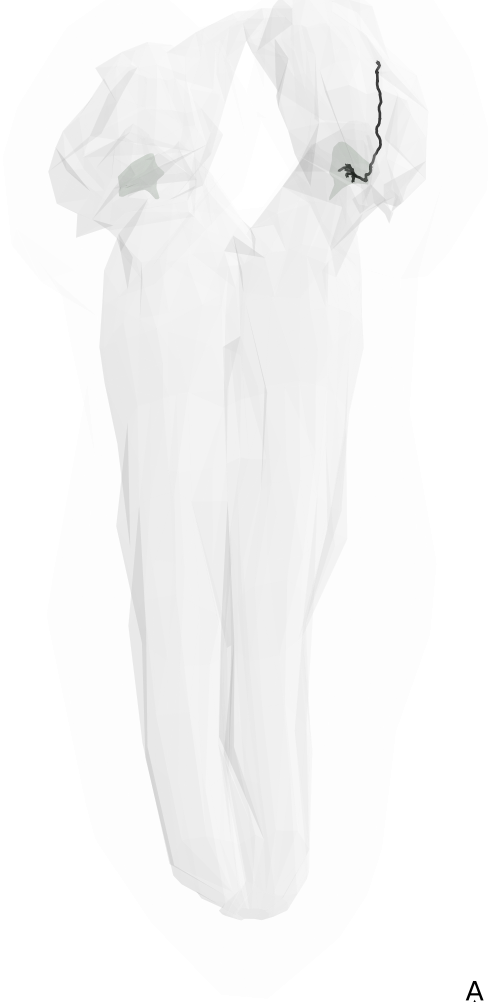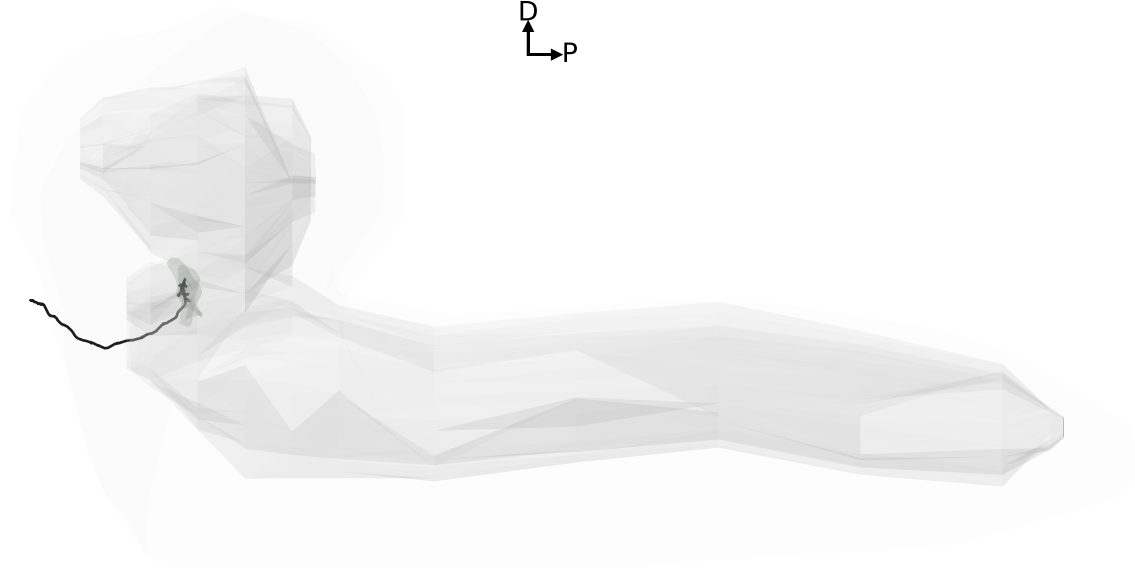

| <i>ID</i> | <i>name</i>          | SCACa | SCAVa | SCAVp | SCACal | SCACp | SCACpl | SCVM | IPCs | DMS | DH44 | Se0ens | Se0ph | PMN LR | MN motor neurons | PaN motor neurons | olfactory PNs | gustatory PNs | multiglomerular PNs | unknown PNs | thermo PNs | visual PNs |
|-----------|----------------------|-------|-------|-------|--------|-------|--------|------|------|-----|------|--------|-------|--------|------------------|-------------------|---------------|---------------|---------------------|-------------|------------|------------|
| 4023881   | AN-R-Sens-B3-ACal-04 | 0     | 0     | 0     | 0      | 0     | 0      | 0    | 0    | 0   | 0    | 0      | 0     | 0      | 0                | 0                 | 0             | 0             | 34                  | 0           | 0          | 0          |



ID: 3985829  
 name: AN-R-Sens-B3-ACal-05

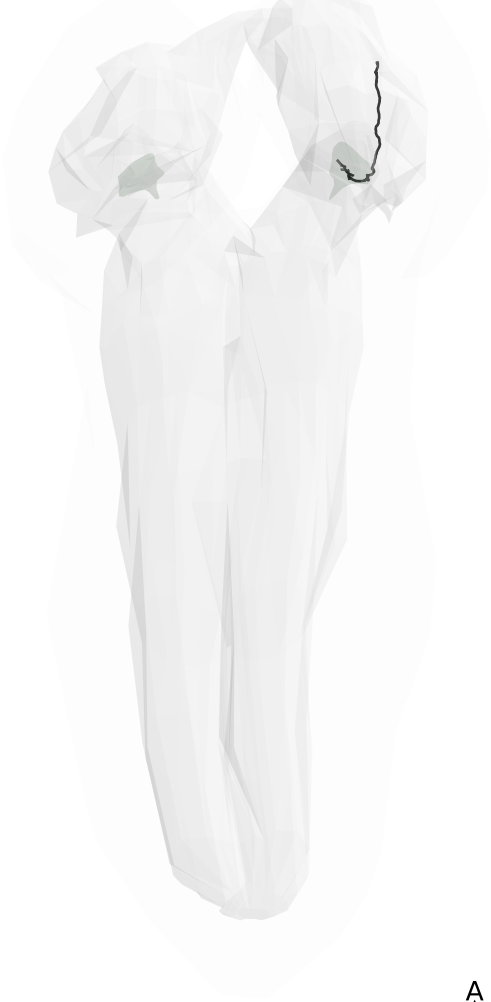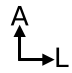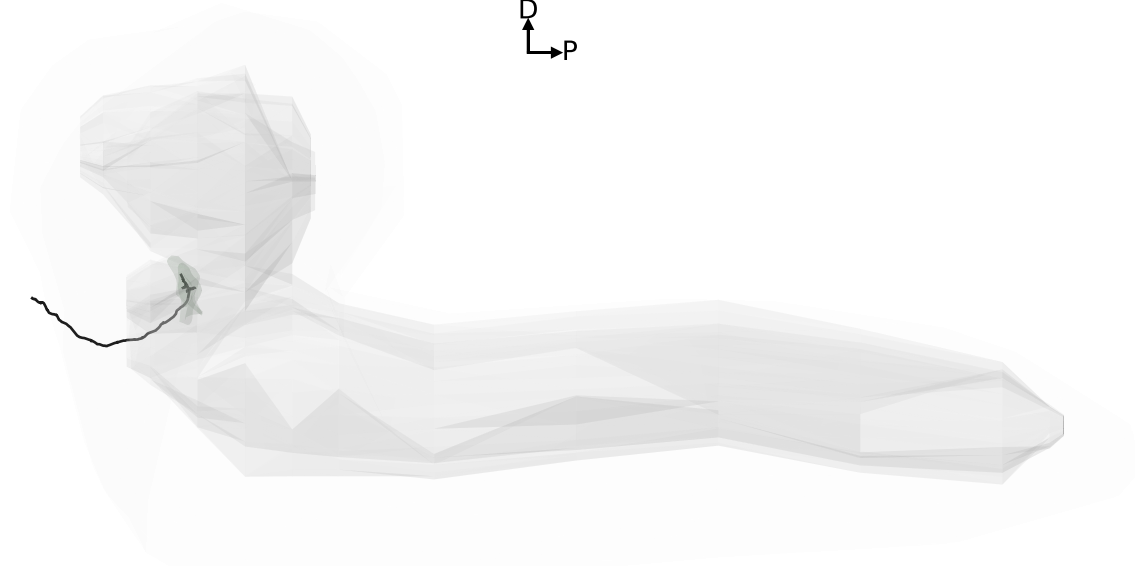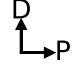

| <i>ID</i> | <i>name</i>          | SCACa | SCAVa | SCAVp | SCACal | SCACp | SCACpl | SCVM | IPCs | DMS | DH44 | Se0ens | Se0ph | PMN LR | MN motor neurons | PaN motor neurons | olfactory PNs | gustatory PNs | multiglomerular PNs | unknown PNs | thermo PNs | visual PNs |
|-----------|----------------------|-------|-------|-------|--------|-------|--------|------|------|-----|------|--------|-------|--------|------------------|-------------------|---------------|---------------|---------------------|-------------|------------|------------|
| 3985829   | AN-R-Sens-B3-ACal-05 | 0     | 0     | 0     | 0      | 0     | 0      | 0    | 0    | 0   | 0    | 0      | 0     | 0      | 0                | 0                 | 0             | 0             | 15                  | 0           | 0          | 0          |

ID: 4017089  
 name: AN-R-Sens-B3-ACal-06

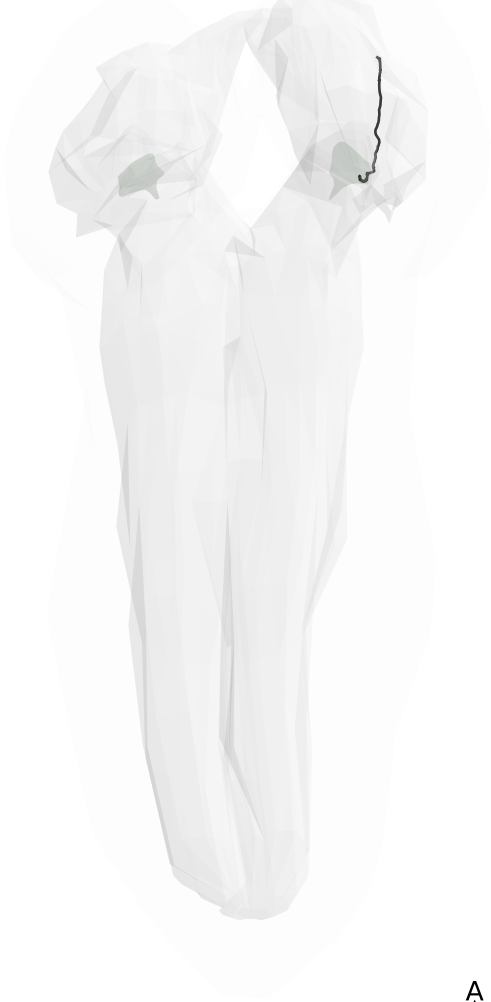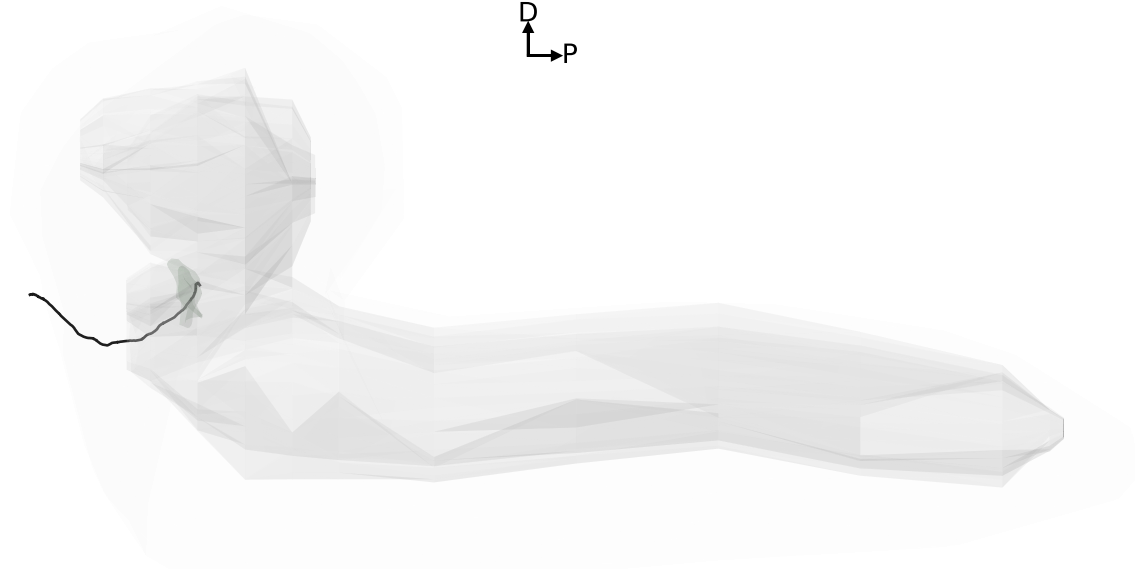

| <i>ID</i> | <i>name</i>          | SCACa | SCAVa | SCAVp | SCACal | SCACp | SCACpl | SCVM | IPCs | DMS | DH44 | Se0ens | Se0ph | PMN LR | MN motor neurons | PaN motor neurons | olfactory PNs | gustatory PNs | multiglomerular PNs | unknown PNs | thermo PNs | visual PNs |
|-----------|----------------------|-------|-------|-------|--------|-------|--------|------|------|-----|------|--------|-------|--------|------------------|-------------------|---------------|---------------|---------------------|-------------|------------|------------|
| 4017089   | AN-R-Sens-B3-ACal-06 | 0     | 0     | 0     | 0      | 0     | 0      | 0    | 0    | 0   | 0    | 0      | 0     | 0      | 0                | 0                 | 0             | 0             | 1                   | 0           | 2          | 0          |

ID: 3966683  
 name: AN-R-Sens-B3-ACal-07

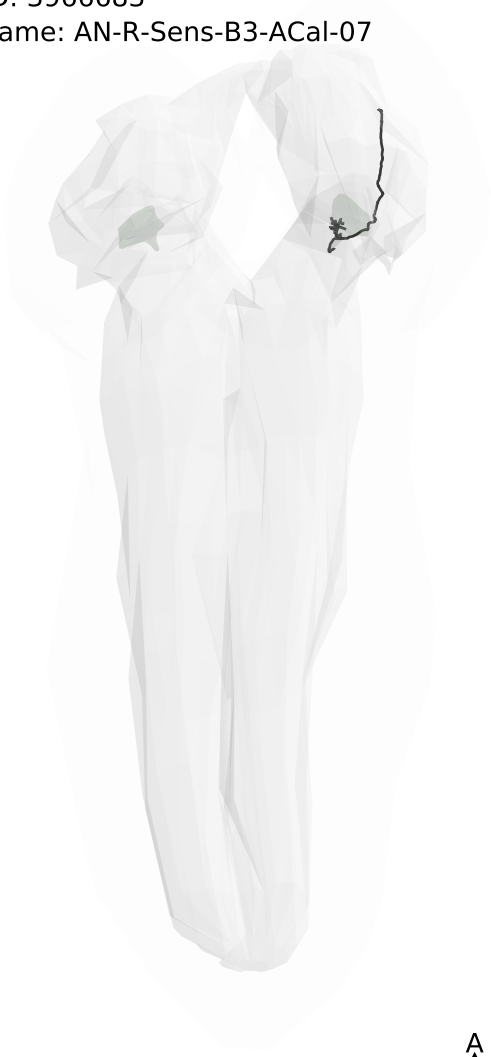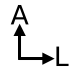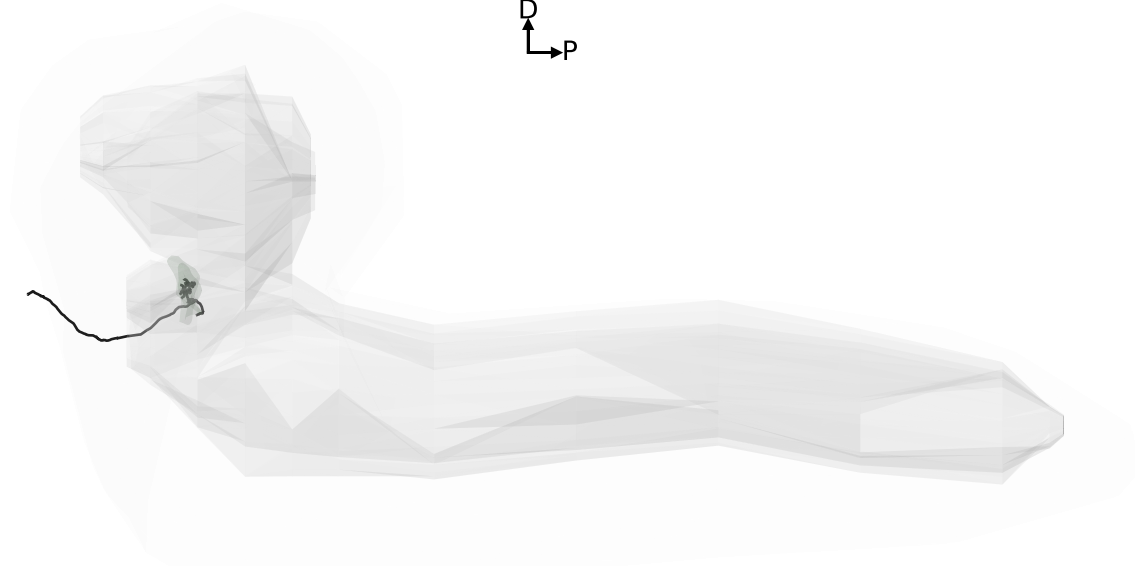

| <i>ID</i> | <i>name</i>          | SCACa | SCAVa | SCAVp | SCACal | SCACp | SCACpl | SCVM | IPCs | DMS | DH44 | Se0ens | Se0ph | PMN LR | MN motor neurons | PaN motor neurons | olfactory PNs | gustatory PNs | multiglomerular PNs | unknown PNs | thermo PNs | visual PNs |
|-----------|----------------------|-------|-------|-------|--------|-------|--------|------|------|-----|------|--------|-------|--------|------------------|-------------------|---------------|---------------|---------------------|-------------|------------|------------|
| 3966683   | AN-R-Sens-B3-ACal-07 | 0     | 0     | 0     | 0      | 1     | 0      | 0    | 0    | 0   | 0    | 0      | 0     | 0      | 0                | 0                 | 0             | 1             | 0                   | 0           | 0          | 0          |













ID: 15997983  
 name: AN-L-Sens-B2-ACp-06

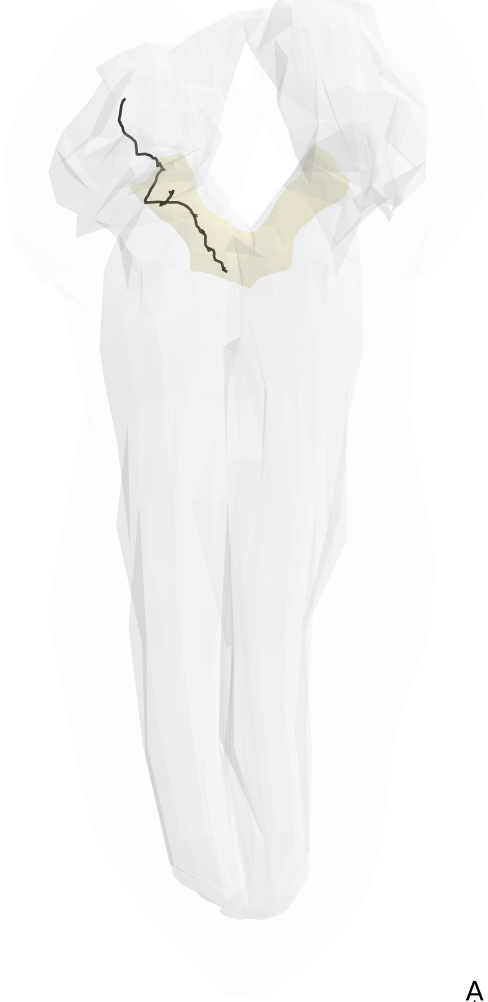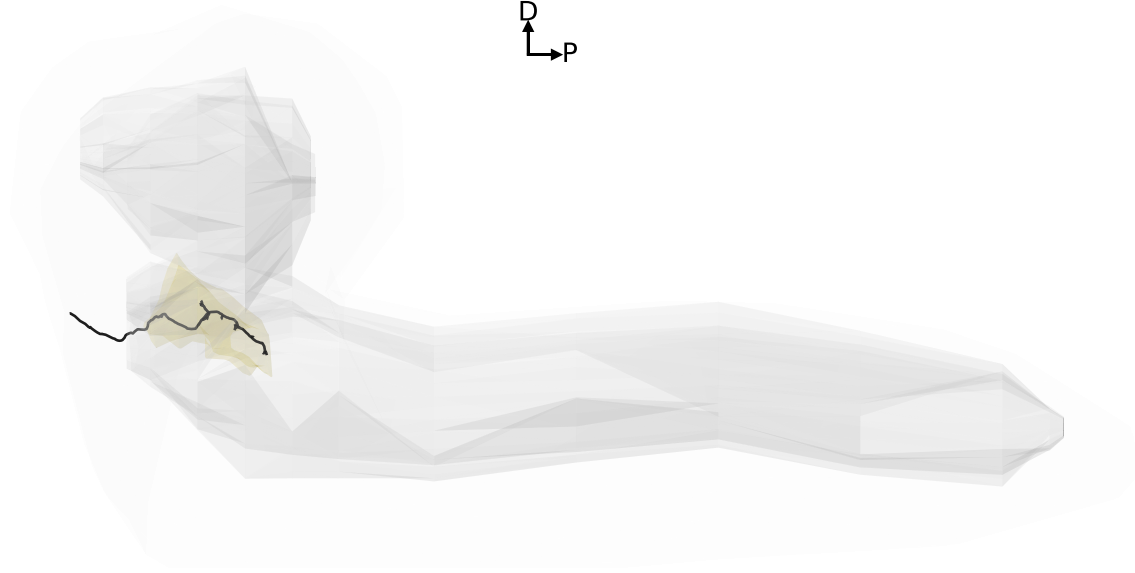

| <i>ID</i> | <i>name</i>         | SCACa | SCAVa | SCAVp | SCACal | SCACp | SCACpl | SCVM | IPCs | DMS | DH44 | Se0ens | Se0ph | PMN LR | MN motor neurons | PaN motor neurons | olfactory PNs | gustatory PNs | multiglomerular PNs | unknown PNs | thermo PNs | visual PNs |
|-----------|---------------------|-------|-------|-------|--------|-------|--------|------|------|-----|------|--------|-------|--------|------------------|-------------------|---------------|---------------|---------------------|-------------|------------|------------|
| 15997983  | AN-L-Sens-B2-ACp-06 | 0     | 0     | 0     | 0      | 1     | 0      | 0    | 0    | 0   | 0    | 0      | 0     | 0      | 0                | 0                 | 0             | 1             | 0                   | 0           | 0          | 0          |







ID: 15998768  
 name: AN-L-Sens-B2-ACp-09

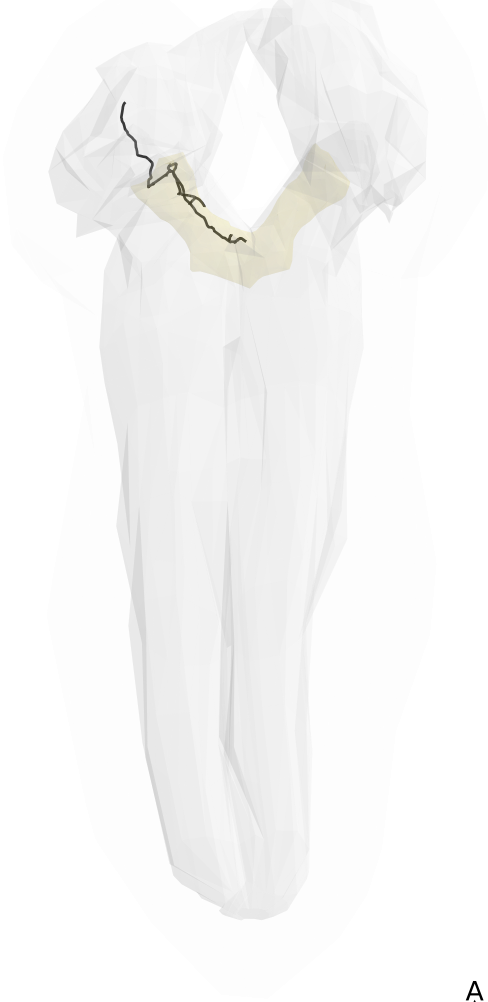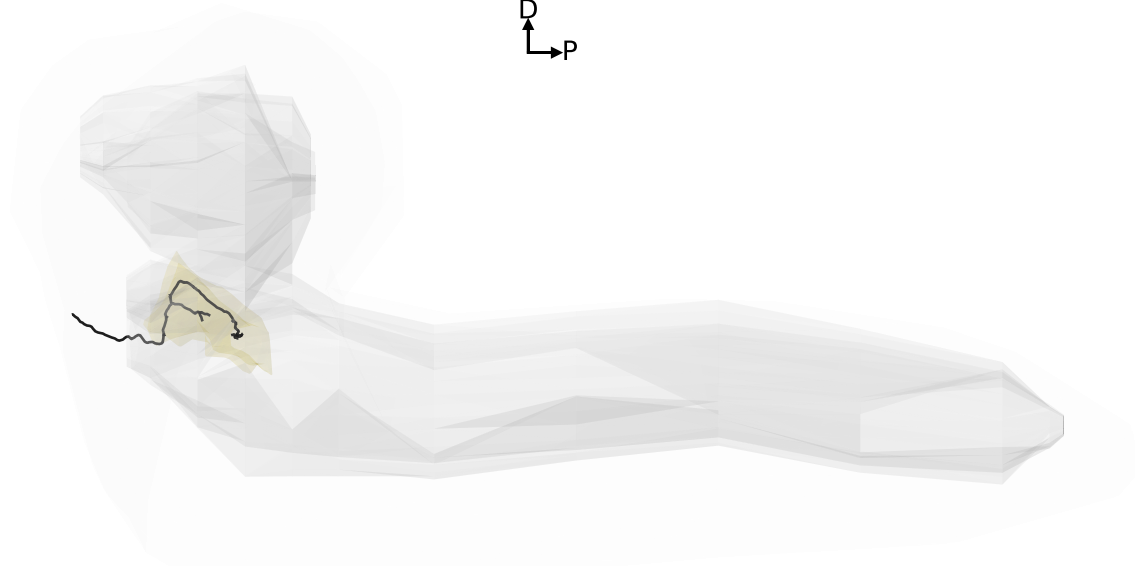

| <i>ID</i> | <i>name</i>         | SCACa | SCAVa | SCAVp | SCACal | SCACp | SCACpl | SCVM | IPCs | DMS | DH44 | Se0ens | Se0ph | PMN LR | MN motor neurons | PaN motor neurons | olfactory PNs | gustatory PNs | multiglomerular PNs | unknown PNs | thermo PNs | visual PNs |
|-----------|---------------------|-------|-------|-------|--------|-------|--------|------|------|-----|------|--------|-------|--------|------------------|-------------------|---------------|---------------|---------------------|-------------|------------|------------|
| 15998768  | AN-L-Sens-B2-ACp-09 | 0     | 0     | 0     | 0      | 2     | 0      | 0    | 0    | 0   | 0    | 0      | 0     | 0      | 0                | 0                 | 1             | 1             | 0                   | 0           | 0          | 0          |

ID: 15998307  
 name: AN-L-Sens-B2-ACp-10

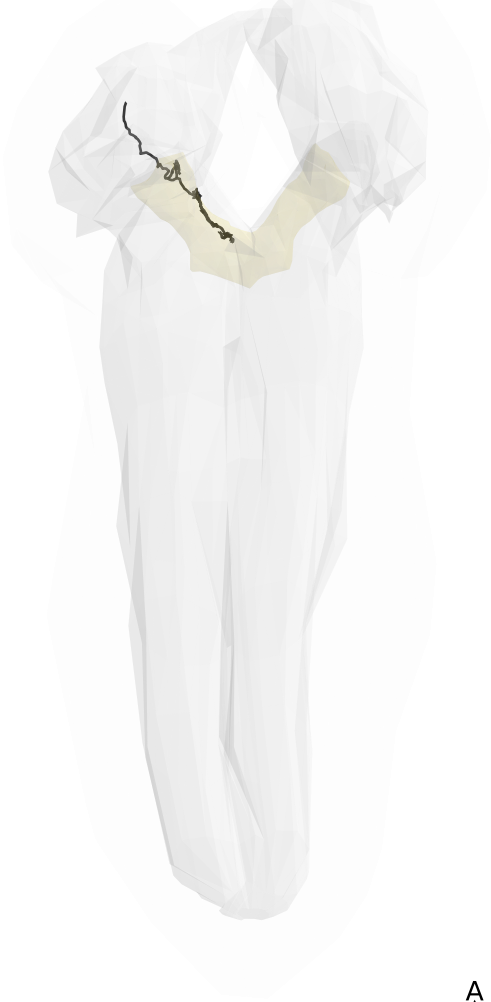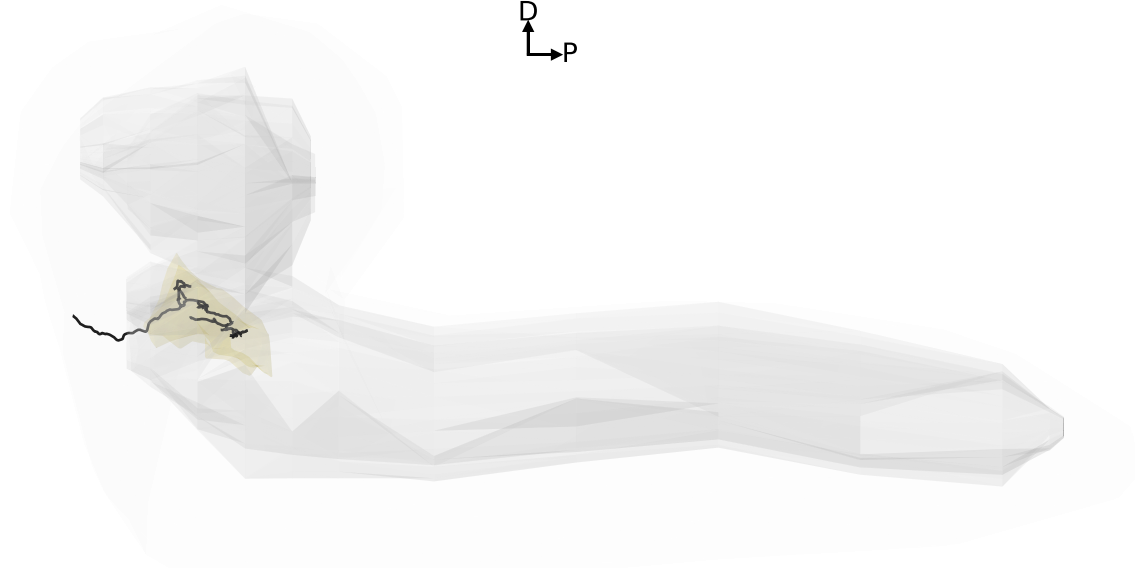

| <i>ID</i> | <i>name</i>         | SCACa | SCAVa | SCAVp | SCACal | SCACp | SCACpl | SCVM | IPCs | DMS | DH44 | Se0ens | Se0ph | PMN LR | MN motor neurons | PaN motor neurons | olfactory PNs | gustatory PNs | multiglomerular PNs | unknown PNs | thermo PNs | visual PNs |
|-----------|---------------------|-------|-------|-------|--------|-------|--------|------|------|-----|------|--------|-------|--------|------------------|-------------------|---------------|---------------|---------------------|-------------|------------|------------|
| 15998307  | AN-L-Sens-B2-ACp-10 | 0     | 0     | 0     | 0      | 6     | 0      | 0    | 0    | 0   | 0    | 0      | 0     | 0      | 0                | 0                 | 1             | 2             | 0                   | 0           | 2          | 0          |

ID: 15996518  
 name: AN-L-Sens-B2-ACp-11

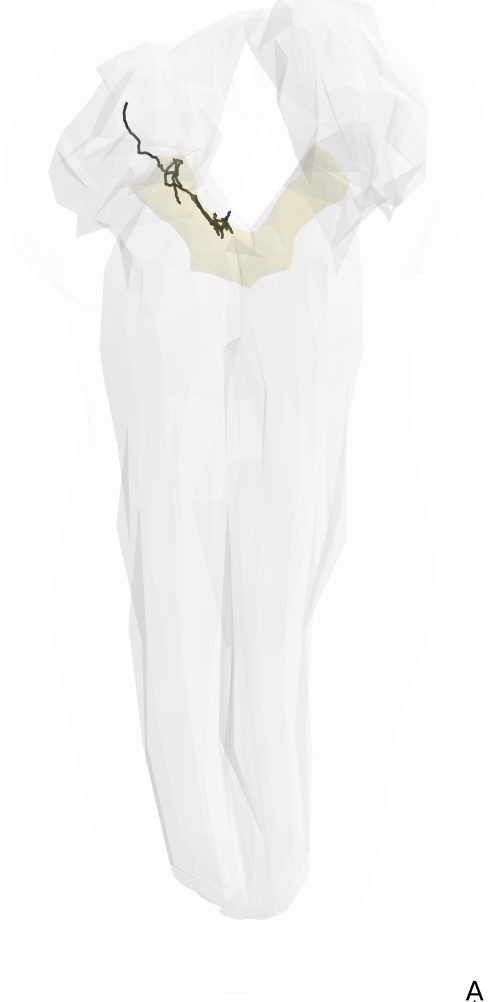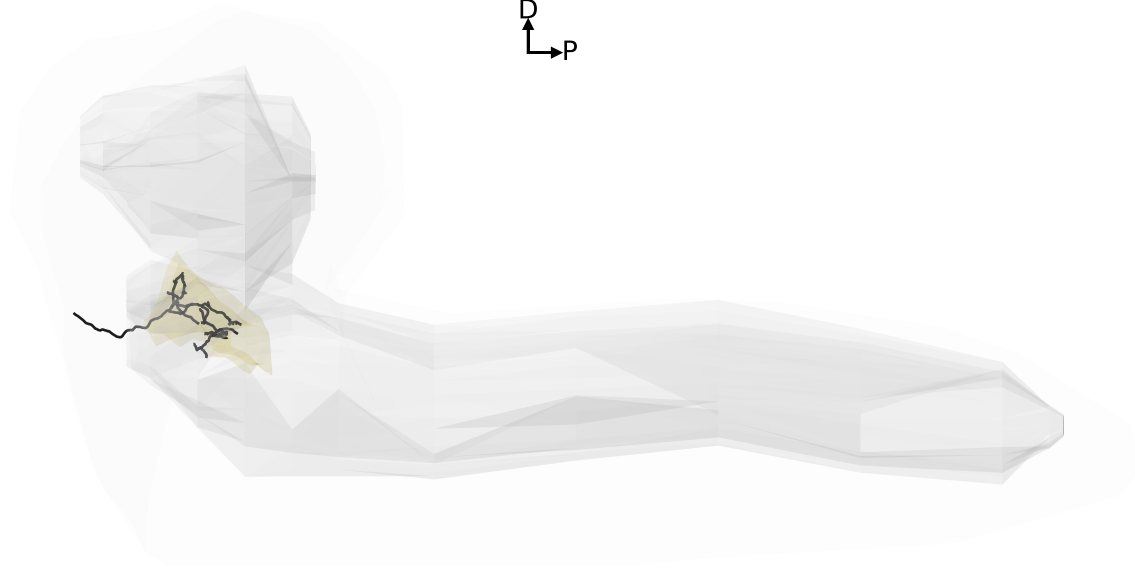

| <i>ID</i> | <i>name</i>         | SCACa | SCAVa | SCAVp | SCACal | SCACp | SCACpl | SCVM | IPCs | DMS | DH44 | Se0ens | Se0ph | PMN LR | MN motor neurons | PaN motor neurons | olfactory PNs | gustatory PNs | multiglomerular PNs | unknown PNs | thermo PNs | visual PNs |
|-----------|---------------------|-------|-------|-------|--------|-------|--------|------|------|-----|------|--------|-------|--------|------------------|-------------------|---------------|---------------|---------------------|-------------|------------|------------|
| 15996518  | AN-L-Sens-B2-ACp-11 | 0     | 0     | 0     | 0      | 7     | 0      | 0    | 0    | 0   | 0    | 0      | 0     | 0      | 0                | 0                 | 0             | 1             | 0                   | 0           | 0          | 0          |

ID: 15998817  
 name: AN-L-Sens-B2-ACp-12

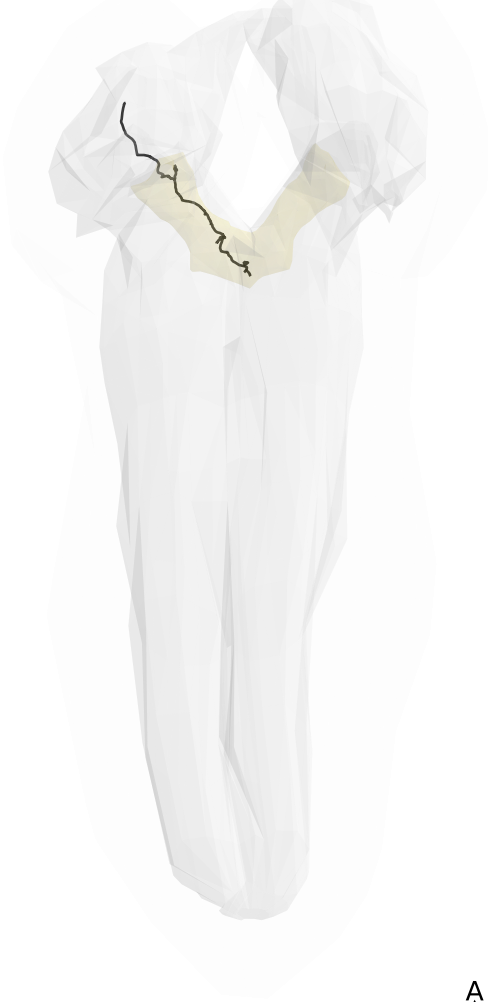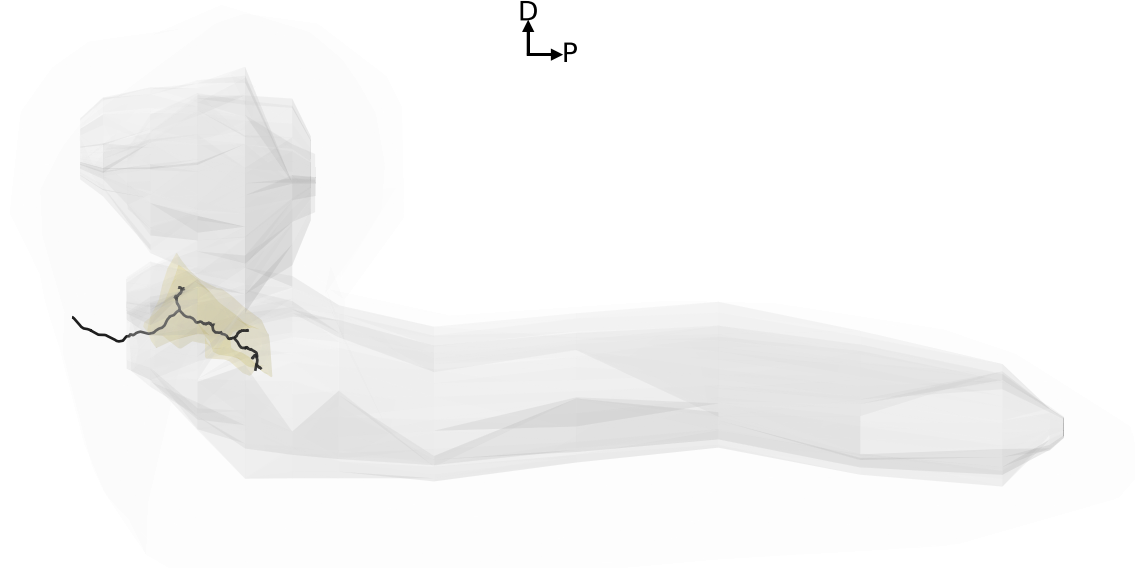

| <i>ID</i> | <i>name</i>         | SCACa | SCAVa | SCAVp | SCACal | SCACp | SCACpl | SCVM | IPCs | DMS | DH44 | Se0ens | Se0ph | PMN LR | MN motor neurons | PaN motor neurons | olfactory PNs | gustatory PNs | multiglomerular PNs | unknown PNs | thermo PNs | visual PNs |
|-----------|---------------------|-------|-------|-------|--------|-------|--------|------|------|-----|------|--------|-------|--------|------------------|-------------------|---------------|---------------|---------------------|-------------|------------|------------|
| 15998817  | AN-L-Sens-B2-ACp-12 | 0     | 0     | 0     | 0      | 6     | 0      | 0    | 0    | 0   | 0    | 0      | 0     | 0      | 0                | 0                 | 0             | 1             | 0                   | 0           | 0          | 0          |

ID: 15998100  
 name: AN-L-Sens-B2-ACp-13

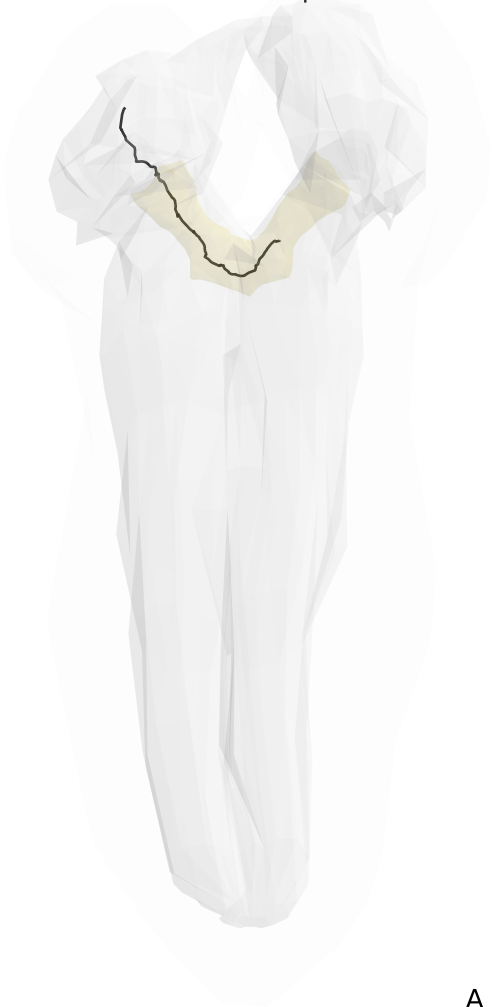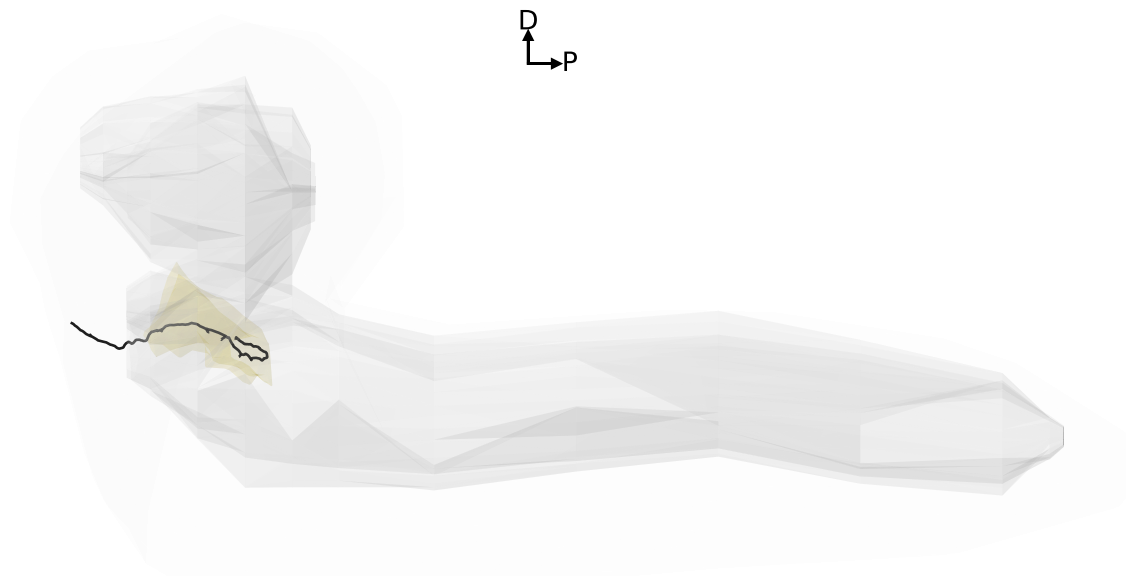

| <i>ID</i> | <i>name</i>         | SCACa | SCAVa | SCAVp | SCACal | SCACp | SCACpl | SCVM | IPCs | DMS | DH44 | Se0ens | Se0ph | PMN LR | MN motor neurons | PaN motor neurons | olfactory PNs | gustatory PNs | multiglomerular PNs | unknown PNs | thermo PNs | visual PNs |
|-----------|---------------------|-------|-------|-------|--------|-------|--------|------|------|-----|------|--------|-------|--------|------------------|-------------------|---------------|---------------|---------------------|-------------|------------|------------|
| 15998100  | AN-L-Sens-B2-ACp-13 | 0     | 0     | 0     | 0      | 3     | 0      | 0    | 0    | 0   | 0    | 0      | 0     | 0      | 0                | 0                 | 0             | 3             | 0                   | 0           | 0          | 0          |

ID: 15997645  
 name: AN-L-Sens-B2-ACp-14

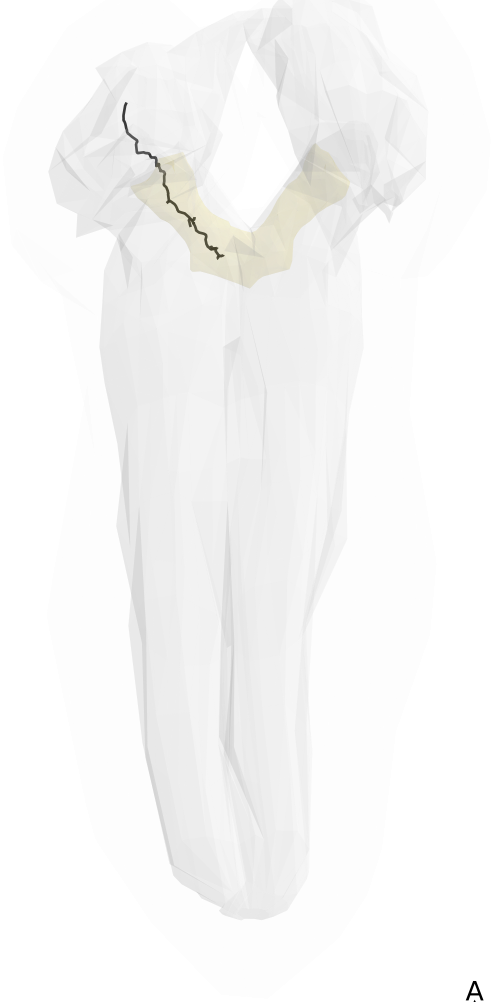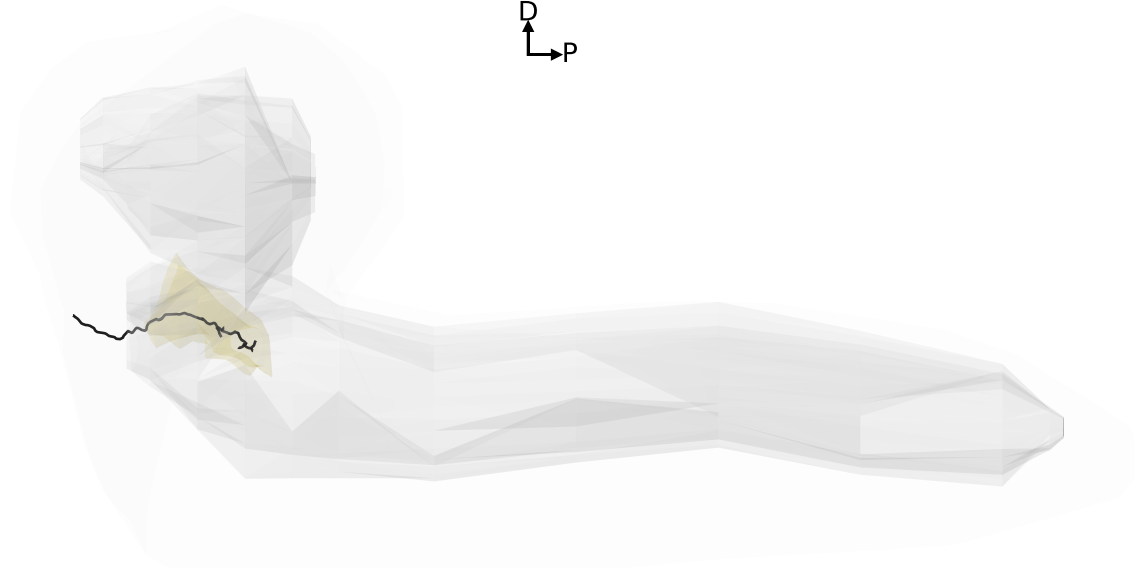

| <i>ID</i> | <i>name</i>         | SCACa | SCAVa | SCAVp | SCACal | SCACp | SCACpl | SCVM | IPCs | DMS | DH44 | Se0ens | Se0ph | PMN LR | MN motor neurons | PaN motor neurons | olfactory PNs | gustatory PNs | multiglomerular PNs | unknown PNs | thermo PNs | visual PNs |
|-----------|---------------------|-------|-------|-------|--------|-------|--------|------|------|-----|------|--------|-------|--------|------------------|-------------------|---------------|---------------|---------------------|-------------|------------|------------|
| 15997645  | AN-L-Sens-B2-ACp-14 | 0     | 0     | 0     | 0      | 6     | 0      | 0    | 0    | 0   | 0    | 0      | 0     | 0      | 0                | 0                 | 0             | 7             | 0                   | 0           | 0          | 0          |

ID: 15998261  
 name: AN-L-Sens-B2-ACp-15

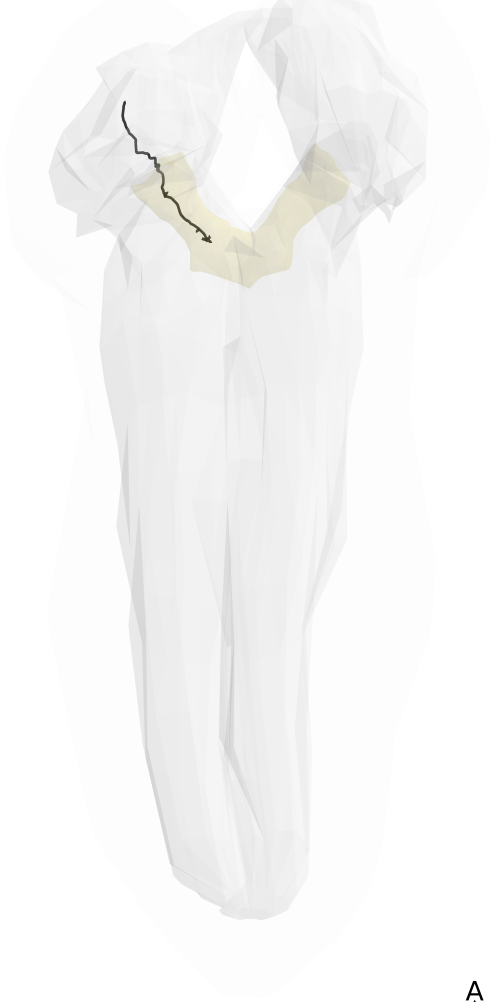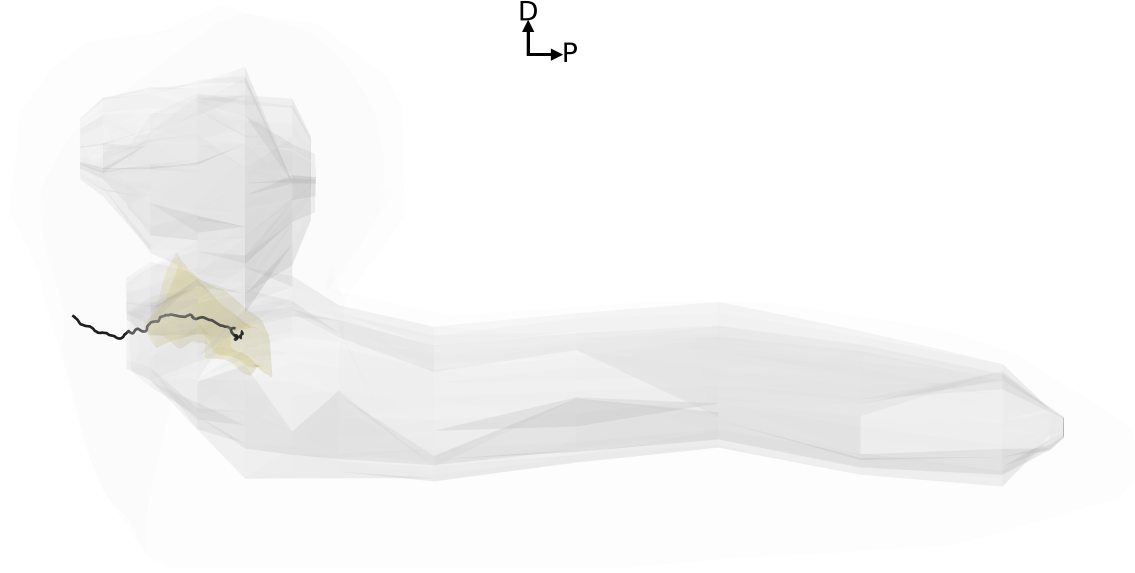

| <i>ID</i> | <i>name</i>         | SCACa | SCAVa | SCAVp | SCACal | SCACp | SCACpl | SCVM | IPCs | DMS | DH44 | Se0ens | Se0ph | PMN LR | MN motor neurons | PaN motor neurons | olfactory PNs | gustatory PNs | multiglomerular PNs | unknown PNs | thermo PNs | visual PNs |
|-----------|---------------------|-------|-------|-------|--------|-------|--------|------|------|-----|------|--------|-------|--------|------------------|-------------------|---------------|---------------|---------------------|-------------|------------|------------|
| 15998261  | AN-L-Sens-B2-ACp-15 | 0     | 0     | 0     | 0      | 0     | 0      | 0    | 0    | 0   | 0    | 0      | 0     | 0      | 0                | 0                 | 1             | 0             | 0                   | 0           | 0          | 0          |

ID: 15997807  
 name: AN-L-Sens-B2-ACp-16

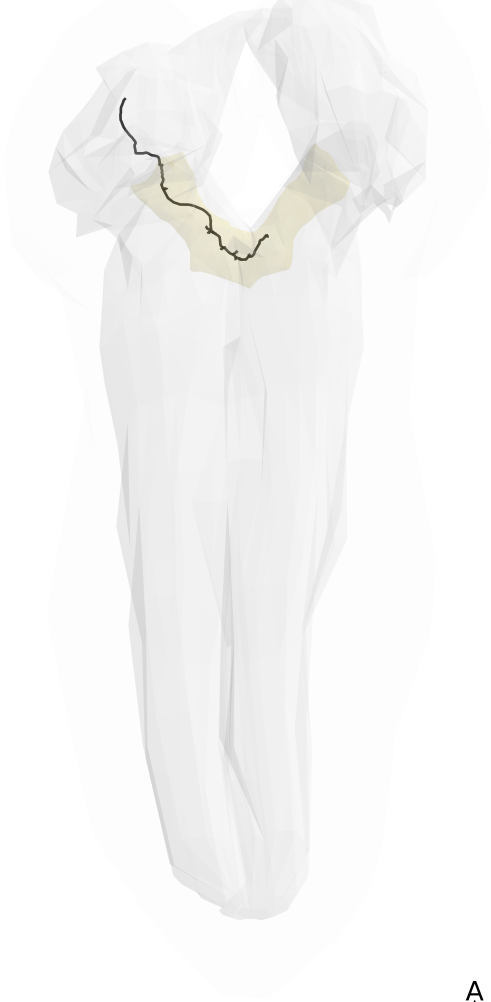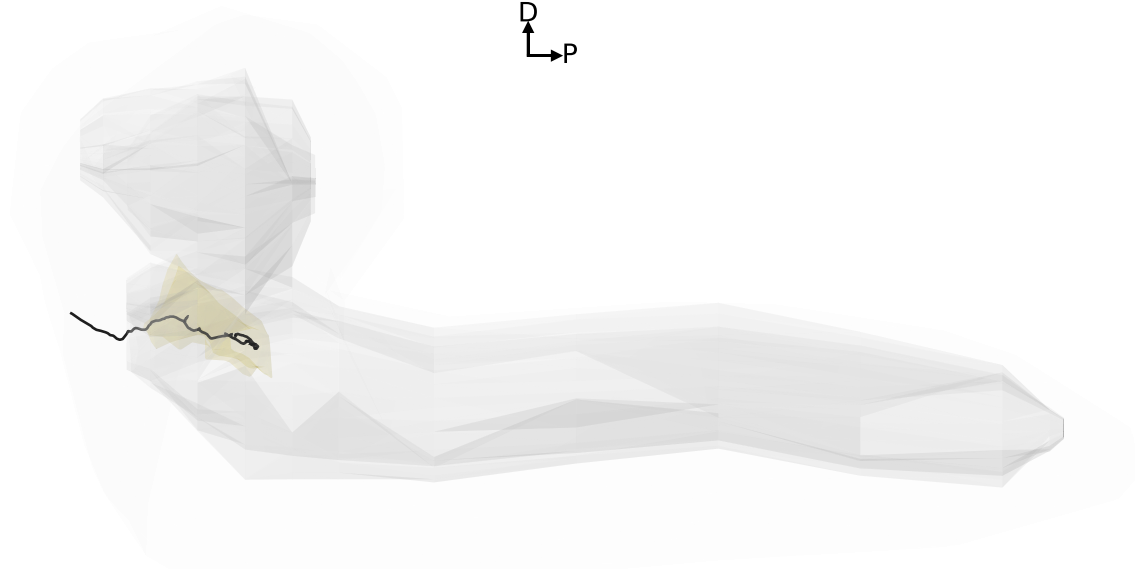

| <i>ID</i> | <i>name</i>         | SCACa | SCAVa | SCAVp | SCACal | SCACp | SCACpl | SCVM | IPCs | DMS | DH44 | Se0ens | Se0ph | PMN LR | MN motor neurons | PaN motor neurons | olfactory PNs | gustatory PNs | multiglomerular PNs | unknown PNs | thermo PNs | visual PNs |
|-----------|---------------------|-------|-------|-------|--------|-------|--------|------|------|-----|------|--------|-------|--------|------------------|-------------------|---------------|---------------|---------------------|-------------|------------|------------|
| 15997807  | AN-L-Sens-B2-ACp-16 | 0     | 0     | 0     | 0      | 2     | 0      | 0    | 0    | 0   | 0    | 0      | 0     | 0      | 0                | 0                 | 0             | 1             | 0                   | 0           | 0          | 0          |



ID: 1715990  
 name: AN-L-Sens-B2-ACp-17

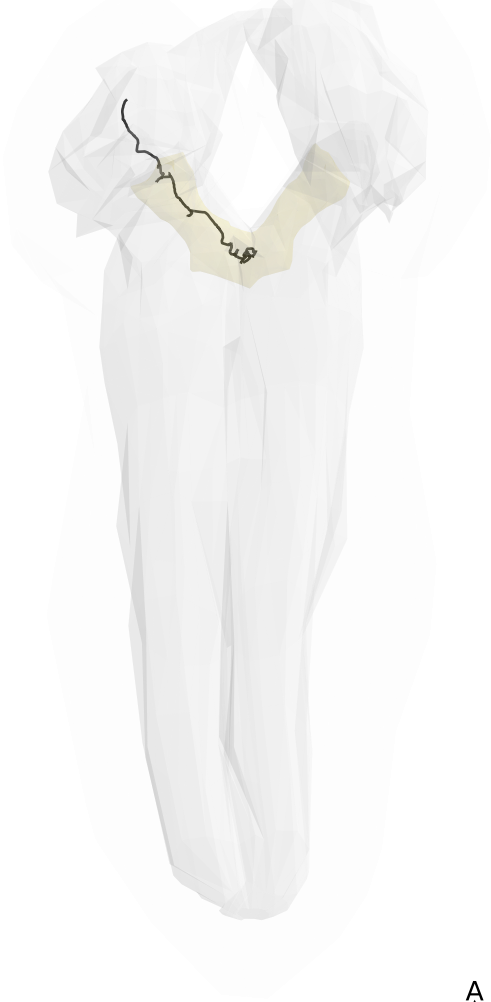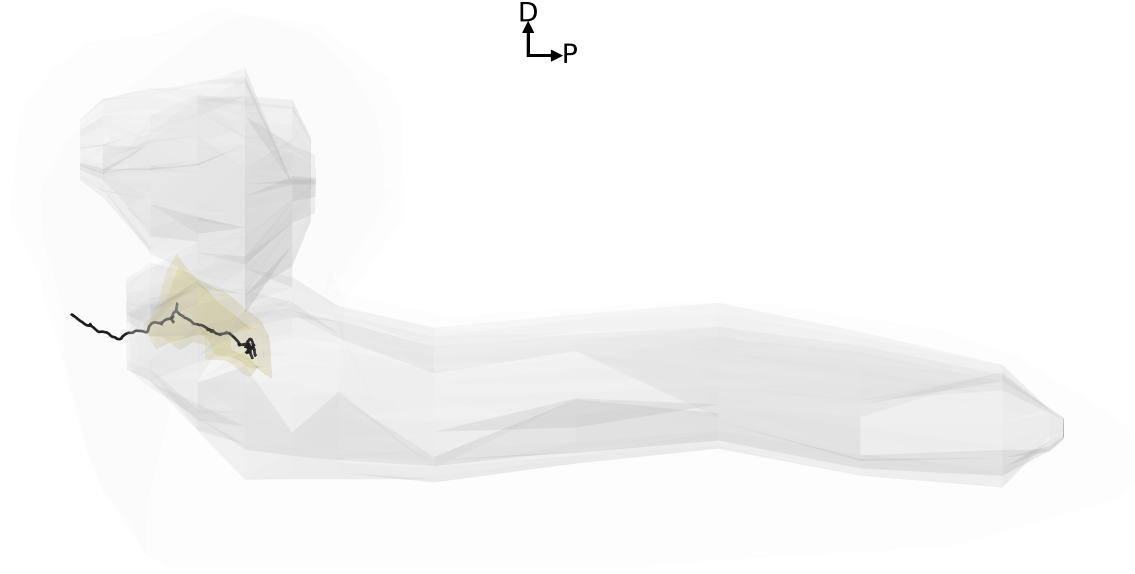

| <i>ID</i> | <i>name</i>         | SCACa | SCAVa | SCAVp | SCACal | SCACp | SCACpl | SCVM | IPCs | DMS | DH44 | Se0ens | Se0ph | PMN LR | MN motor neurons | PaN motor neurons | olfactory PNs | gustatory PNs | multiglomerular PNs | unknown PNs | thermo PNs | visual PNs |
|-----------|---------------------|-------|-------|-------|--------|-------|--------|------|------|-----|------|--------|-------|--------|------------------|-------------------|---------------|---------------|---------------------|-------------|------------|------------|
| 1715990   | AN-L-Sens-B2-ACp-17 | 0     | 0     | 0     | 0      | 2     | 0      | 0    | 0    | 0   | 0    | 0      | 0     | 0      | 0                | 0                 | 1             | 0             | 0                   | 0           | 0          | 0          |







ID: 11671564  
 name: AN-L-Sens-B2-ACp-21

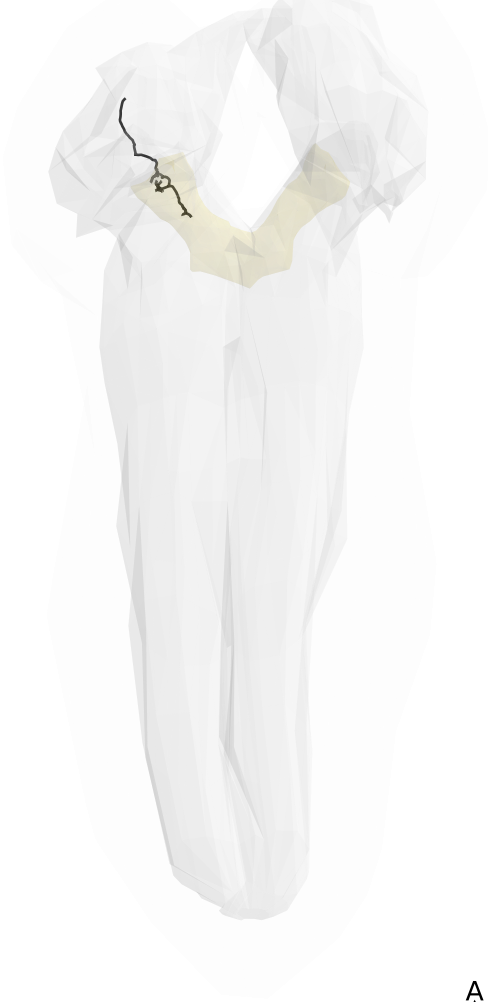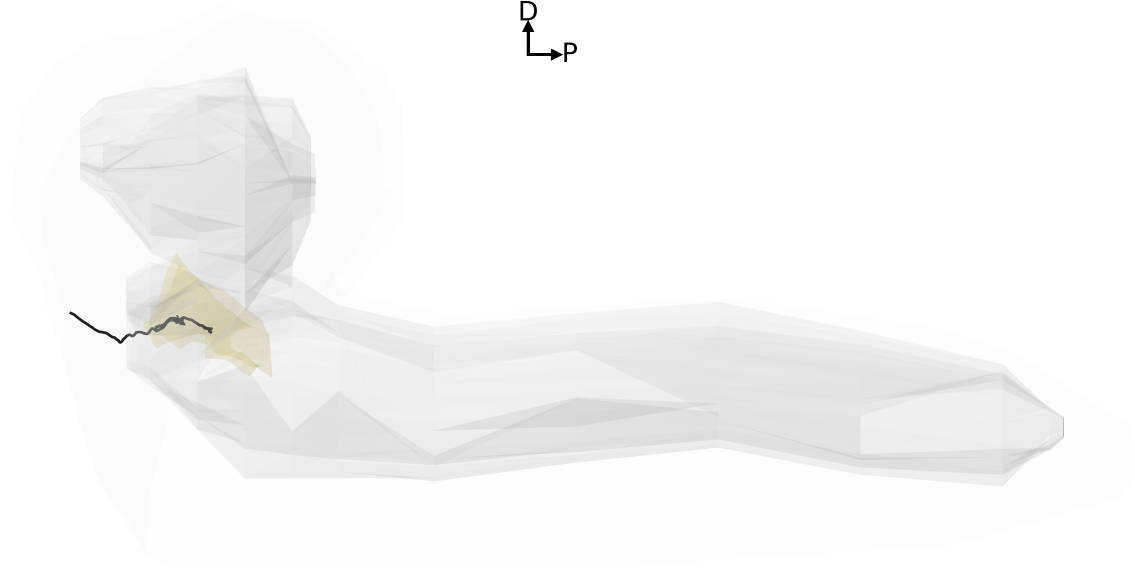

| <i>ID</i> | <i>name</i>         | SCACa | SCAVa | SCAVp | SCACal | SCACp | SCACpl | SCVM | IPCs | DMS | DH44 | Se0ens | Se0ph | PMN LR | MN motor neurons | PaN motor neurons | olfactory PNs | gustatory PNs | multiglomerular PNs | unknown PNs | thermo PNs | visual PNs |
|-----------|---------------------|-------|-------|-------|--------|-------|--------|------|------|-----|------|--------|-------|--------|------------------|-------------------|---------------|---------------|---------------------|-------------|------------|------------|
| 11671564  | AN-L-Sens-B2-ACp-21 | 0     | 0     | 0     | 0      | 1     | 0      | 0    | 0    | 0   | 0    | 0      | 0     | 0      | 0                | 0                 | 11            | 9             | 1                   | 0           | 0          | 0          |

ID: 15995404  
 name: AN-L-Sens-B2-ACp-22

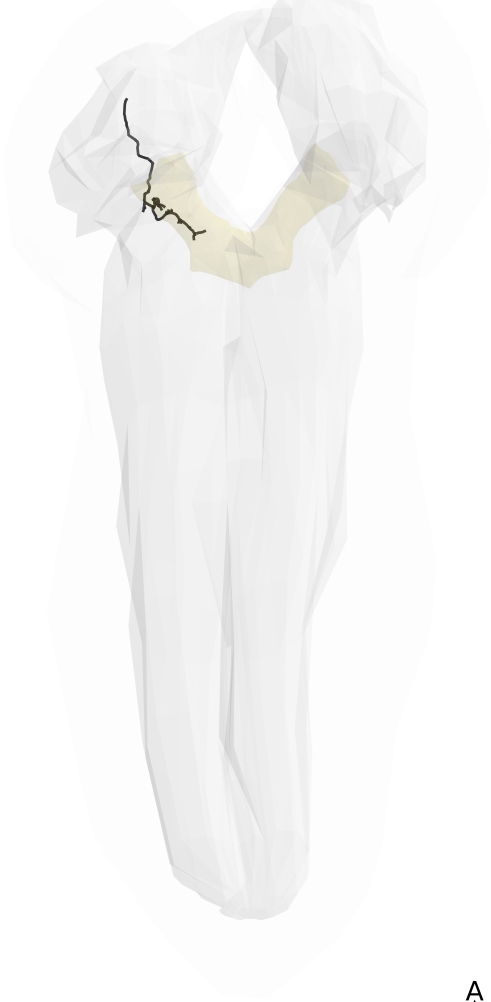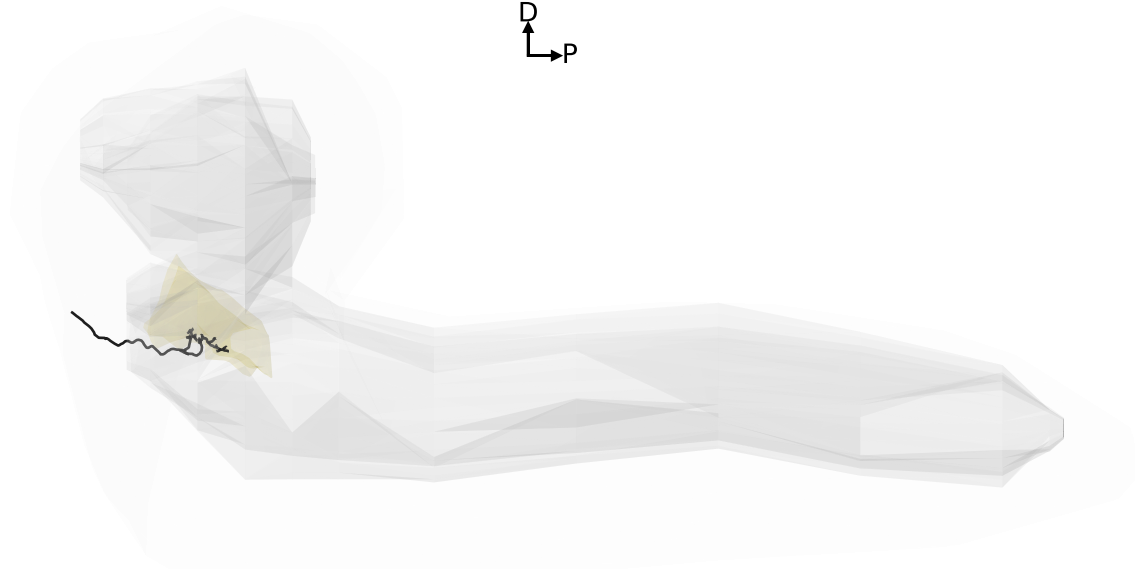

| <i>ID</i> | <i>name</i>         | SCACa | SCAVa | SCAVp | SCACal | SCACp | SCACpl | SCVM | IPCs | DMS | DH44 | Se0ens | Se0ph | PMN LR | MN motor neurons | PaN motor neurons | olfactory PNs | gustatory PNs | multiglomerular PNs | unknown PNs | thermo PNs | visual PNs |
|-----------|---------------------|-------|-------|-------|--------|-------|--------|------|------|-----|------|--------|-------|--------|------------------|-------------------|---------------|---------------|---------------------|-------------|------------|------------|
| 15995404  | AN-L-Sens-B2-ACp-22 | 0     | 0     | 0     | 0      | 0     | 0      | 0    | 0    | 0   | 0    | 0      | 0     | 0      | 0                | 0                 | 0             | 0             | 1                   | 0           | 0          | 0          |



ID: 3652587  
 name: AN-L-Sens-B3-ACp-08

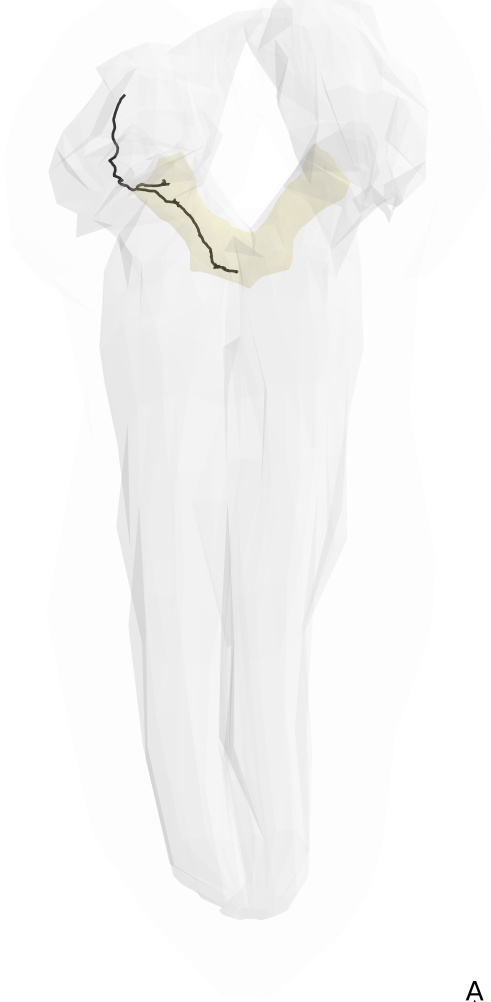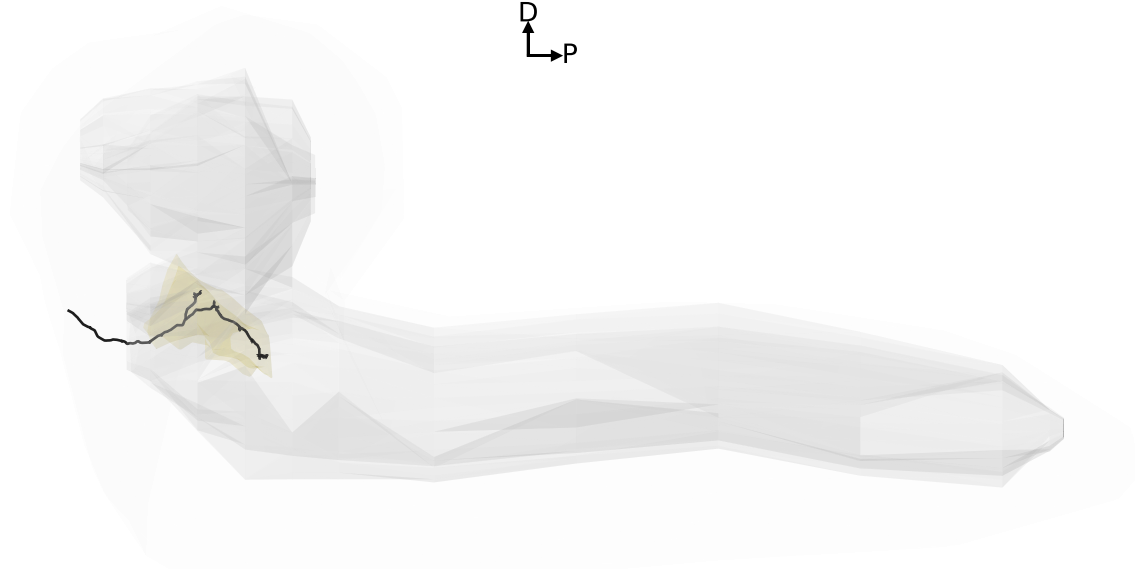

| <i>ID</i> | <i>name</i>         | SCACa | SCAVa | SCAVp | SCACal | SCACp | SCACpl | SCVM | IPCs | DMS | DH44 | Se0ens | Se0ph | PMN LR | MN motor neurons | PaN motor neurons | olfactory PNs | gustatory PNs | multiglomerular PNs | unknown PNs | thermo PNs | visual PNs |
|-----------|---------------------|-------|-------|-------|--------|-------|--------|------|------|-----|------|--------|-------|--------|------------------|-------------------|---------------|---------------|---------------------|-------------|------------|------------|
| 3652587   | AN-L-Sens-B3-ACp-08 | 0     | 0     | 0     | 0      | 1     | 0      | 0    | 0    | 0   | 0    | 0      | 0     | 0      | 0                | 0                 | 0             | 0             | 2                   | 0           | 0          | 0          |



ID: 5186461  
 name: AN-L-Sens-B3-ACp-09

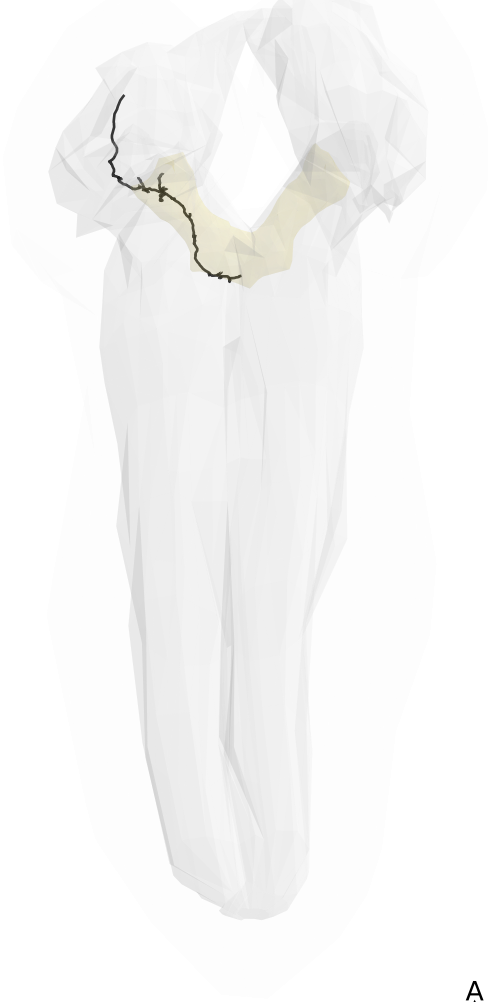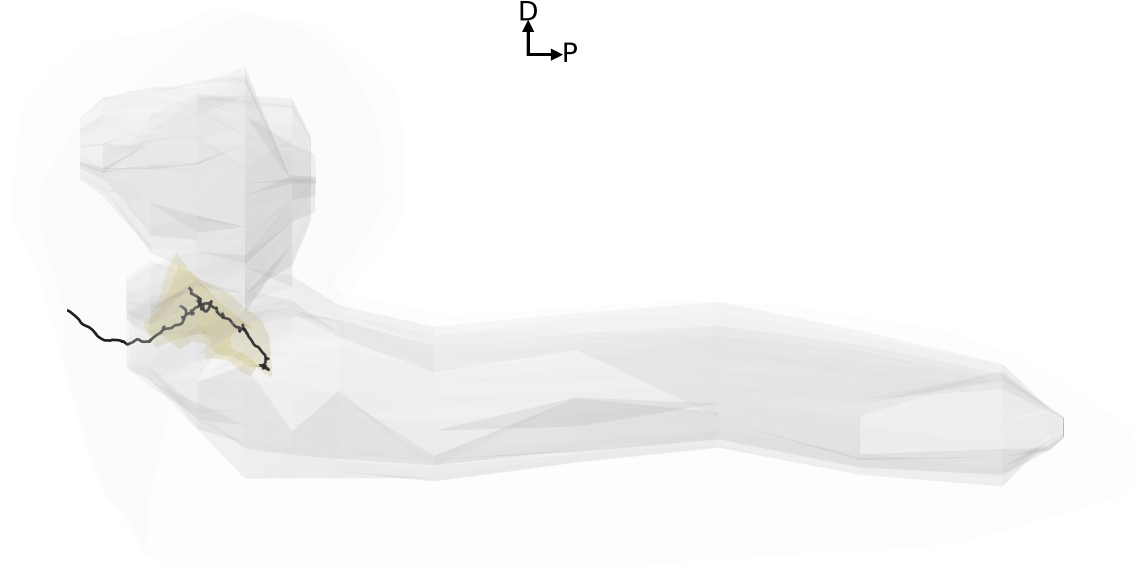

| <i>ID</i> | <i>name</i>         | SCACa | SCAVa | SCAVp | SCACal | SCACp | SCACpl | SCVM | IPCs | DMS | DH44 | Se0ens | Se0ph | PMN LR | MN motor neurons | PaN motor neurons | olfactory PNs | gustatory PNs | multiglomerular PNs | unknown PNs | thermo PNs | visual PNs |
|-----------|---------------------|-------|-------|-------|--------|-------|--------|------|------|-----|------|--------|-------|--------|------------------|-------------------|---------------|---------------|---------------------|-------------|------------|------------|
| 5186461   | AN-L-Sens-B3-ACp-09 | 0     | 0     | 0     | 1      | 3     | 0      | 0    | 0    | 0   | 0    | 0      | 0     | 0      | 0                | 0                 | 12            | 0             | 0                   | 0           | 0          | 0          |

ID: 15508735  
 name: AN-R-Sens-B2-ACp-01

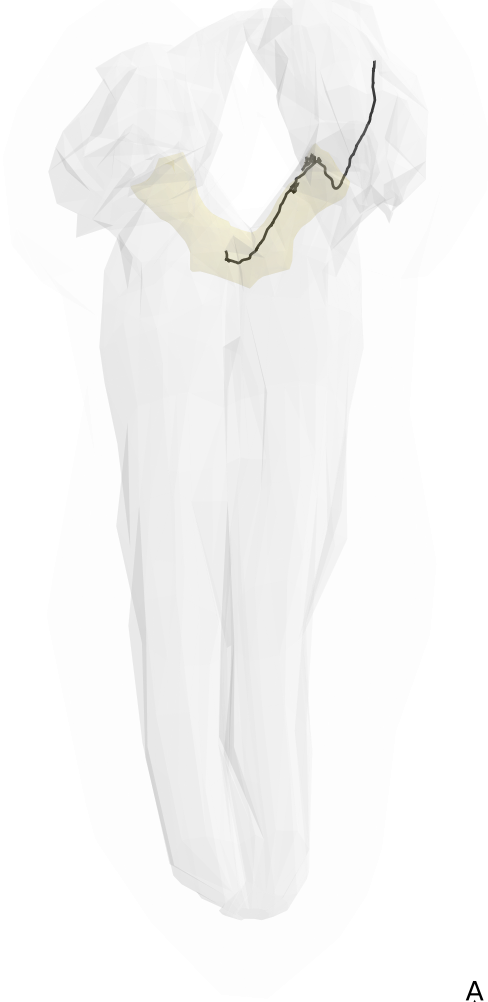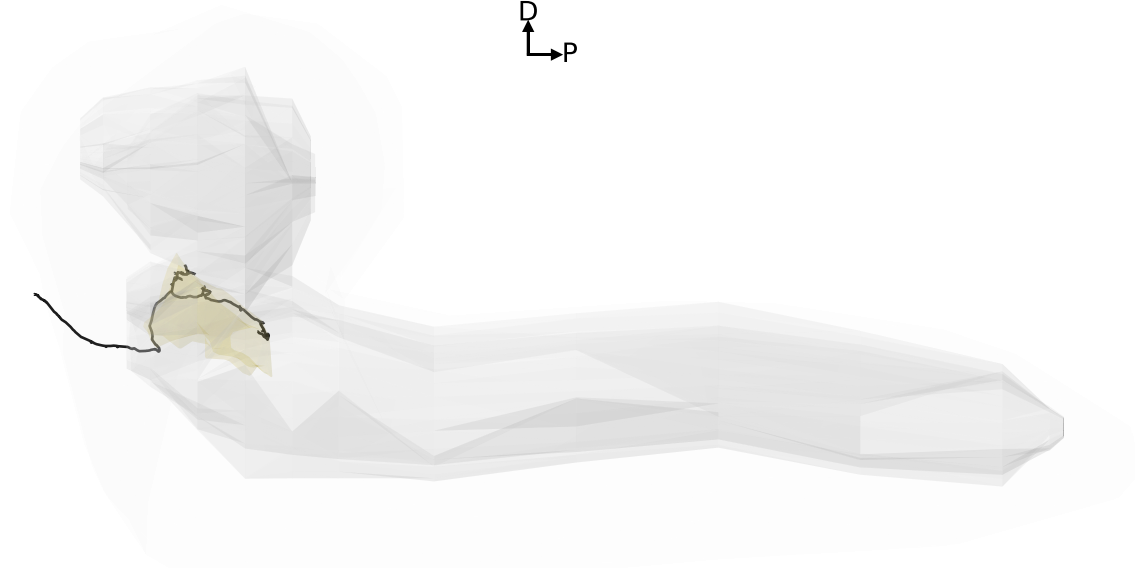

| <i>ID</i> | <i>name</i>         | SCACa | SCAVa | SCAVp | SCACal | SCACp | SCACpl | SCVM | IPCs | DMS | DH44 | Se0ens | Se0ph | PMN LR | MN motor neurons | PaN motor neurons | olfactory PNs | gustatory PNs | multiglomerular PNs | unknown PNs | thermo PNs | visual PNs |
|-----------|---------------------|-------|-------|-------|--------|-------|--------|------|------|-----|------|--------|-------|--------|------------------|-------------------|---------------|---------------|---------------------|-------------|------------|------------|
| 15508735  | AN-R-Sens-B2-ACp-01 | 0     | 0     | 0     | 0      | 0     | 0      | 0    | 0    | 0   | 1    | 0      | 0     | 0      | 0                | 0                 | 0             | 0             | 0                   | 0           | 0          | 0          |

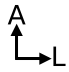



ID: 15531033  
 name: AN-R-Sens-B2-ACp-03

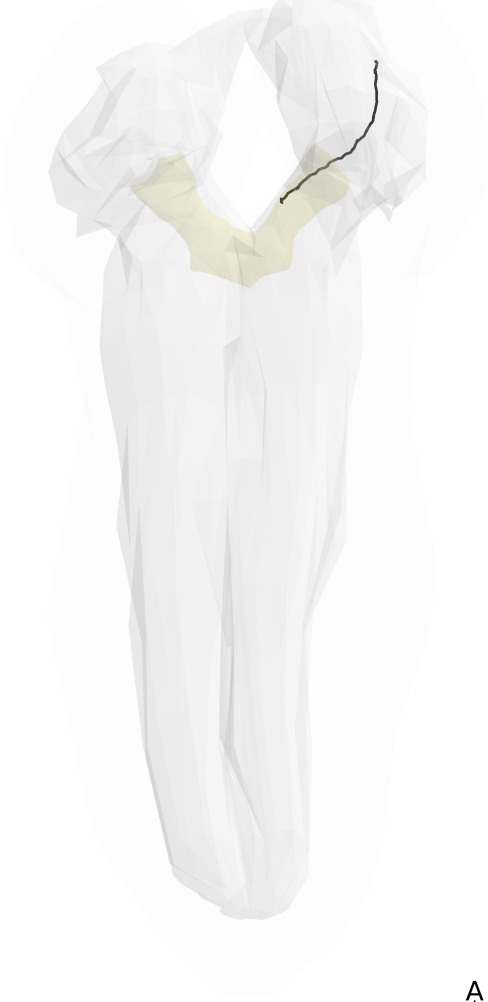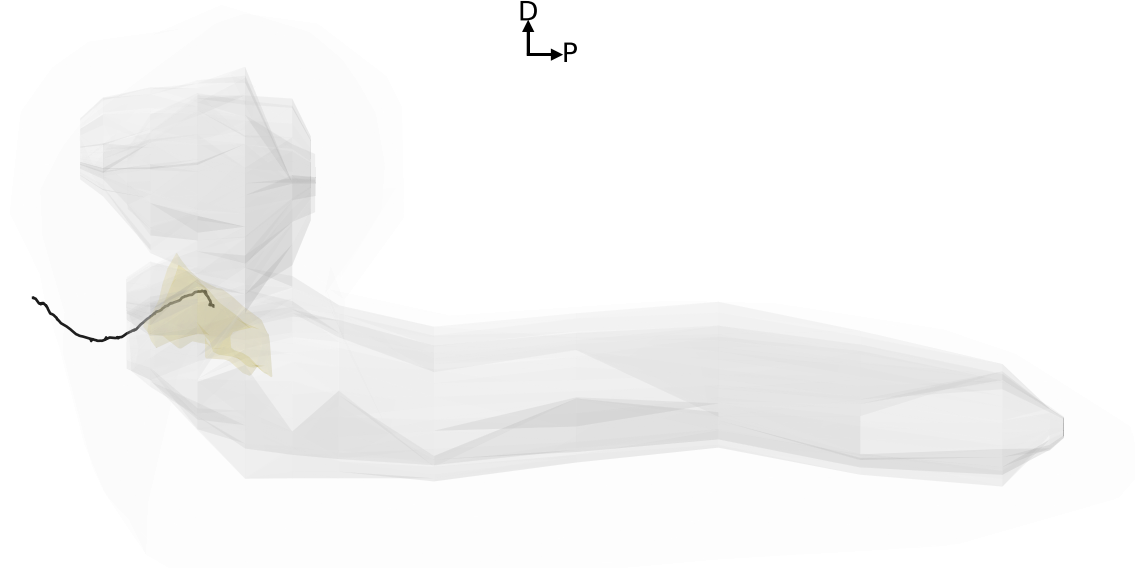

| <i>ID</i> | <i>name</i>         | SCACa | SCAVa | SCAVp | SCACal | SCACp | SCACpl | SCVM | IPCs | DMS | DH44 | Se0ens | Se0ph | PMN LR | MN motor neurons | PaN motor neurons | olfactory PNs | gustatory PNs | multiglomerular PNs | unknown PNs | thermo PNs | visual PNs |
|-----------|---------------------|-------|-------|-------|--------|-------|--------|------|------|-----|------|--------|-------|--------|------------------|-------------------|---------------|---------------|---------------------|-------------|------------|------------|
| 15531033  | AN-R-Sens-B2-ACp-03 | 0     | 0     | 0     | 0      | 5     | 0      | 0    | 0    | 0   | 0    | 0      | 0     | 0      | 0                | 0                 | 0             | 1             | 0                   | 0           | 0          | 0          |





ID: 15434200  
 name: AN-R-Sens-B2-ACp-06

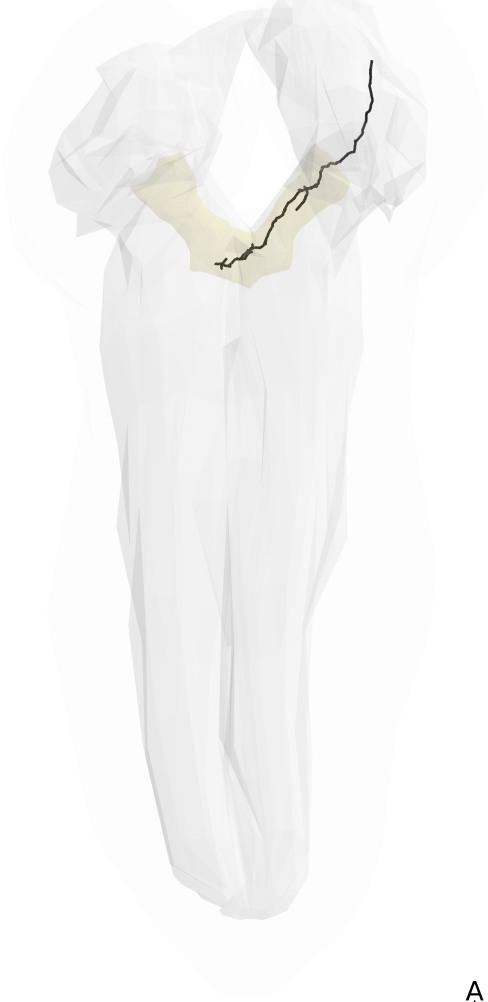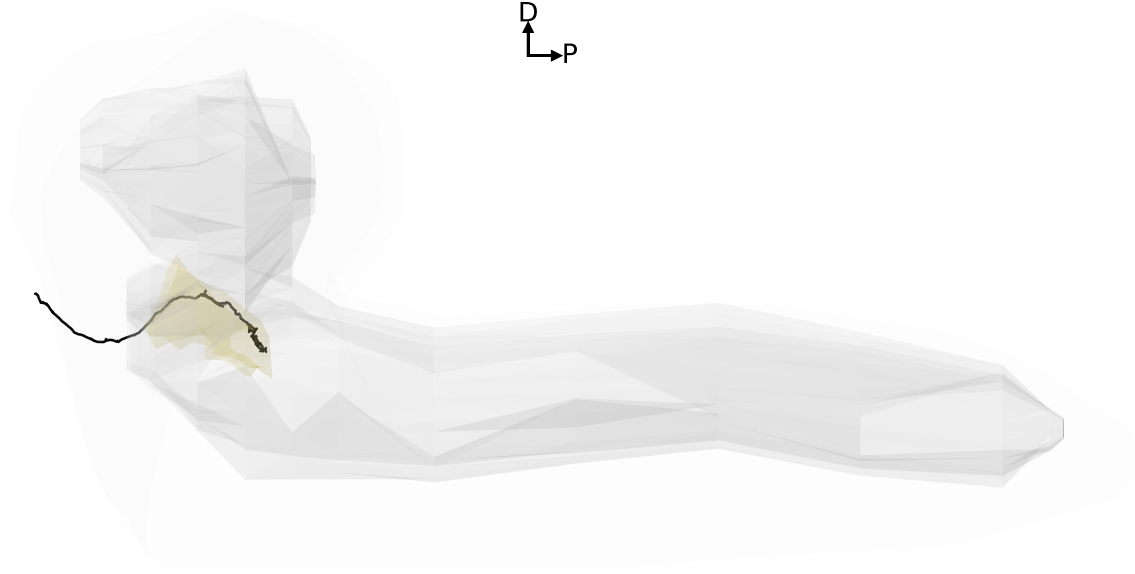

| <i>ID</i> | <i>name</i>         | SCACa | SCAVa | SCAVp | SCACal | SCACp | SCACpl | SCVM | IPCs | DMS | DH44 | Se0ens | Se0ph | PMN LR | MN motor neurons | PaN motor neurons | olfactory PNs | gustatory PNs | multiglomerular PNs | unknown PNs | thermo PNs | visual PNs |
|-----------|---------------------|-------|-------|-------|--------|-------|--------|------|------|-----|------|--------|-------|--------|------------------|-------------------|---------------|---------------|---------------------|-------------|------------|------------|
| 15434200  | AN-R-Sens-B2-ACp-06 | 0     | 0     | 0     | 0      | 4     | 0      | 0    | 0    | 0   | 0    | 0      | 0     | 0      | 0                | 0                 | 2             | 1             | 0                   | 0           | 1          | 0          |









ID: 15458316  
 name: AN-R-Sens-B2-ACp-10

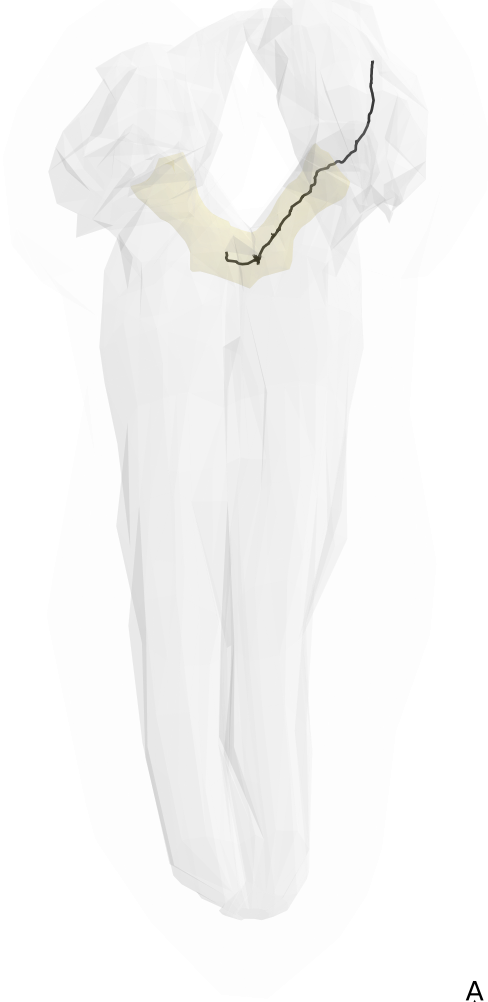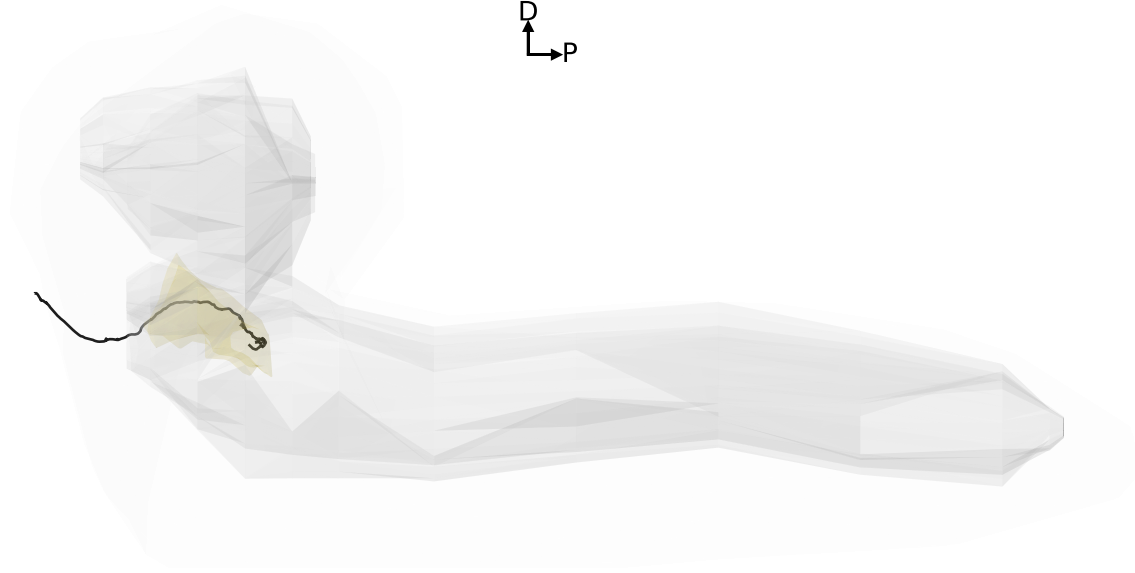

| <i>ID</i> | <i>name</i>         | SCACa | SCAVa | SCAVp | SCACal | SCACp | SCACpl | SCVM | IPCs | DMS | DH44 | Se0ens | Se0ph | PMN LR | MN motor neurons | PaN motor neurons | olfactory PNs | gustatory PNs | multiglomerular PNs | unknown PNs | thermo PNs | visual PNs |
|-----------|---------------------|-------|-------|-------|--------|-------|--------|------|------|-----|------|--------|-------|--------|------------------|-------------------|---------------|---------------|---------------------|-------------|------------|------------|
| 15458316  | AN-R-Sens-B2-ACp-10 | 0     | 0     | 0     | 0      | 2     | 0      | 0    | 0    | 0   | 0    | 0      | 0     | 0      | 0                | 0                 | 0             | 7             | 0                   | 0           | 0          | 0          |

ID: 15592696  
 name: AN-R-Sens-B2-ACp-11

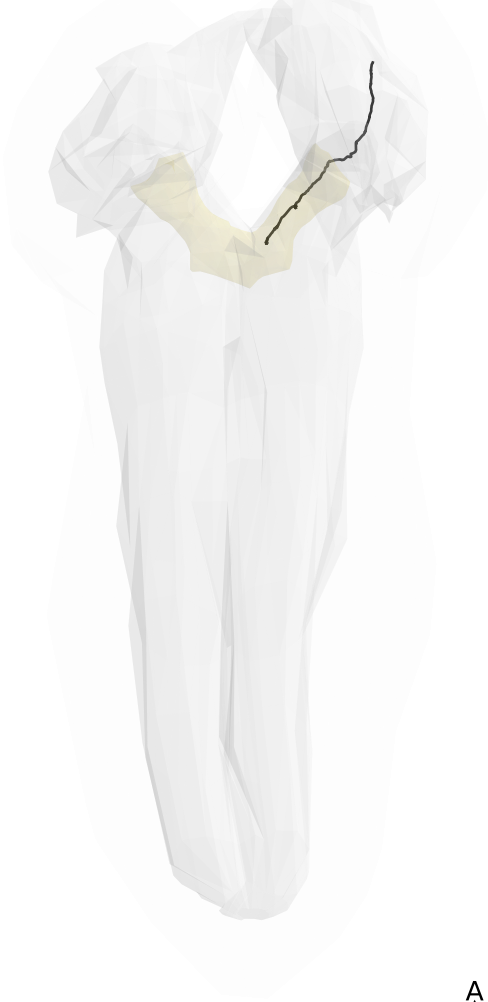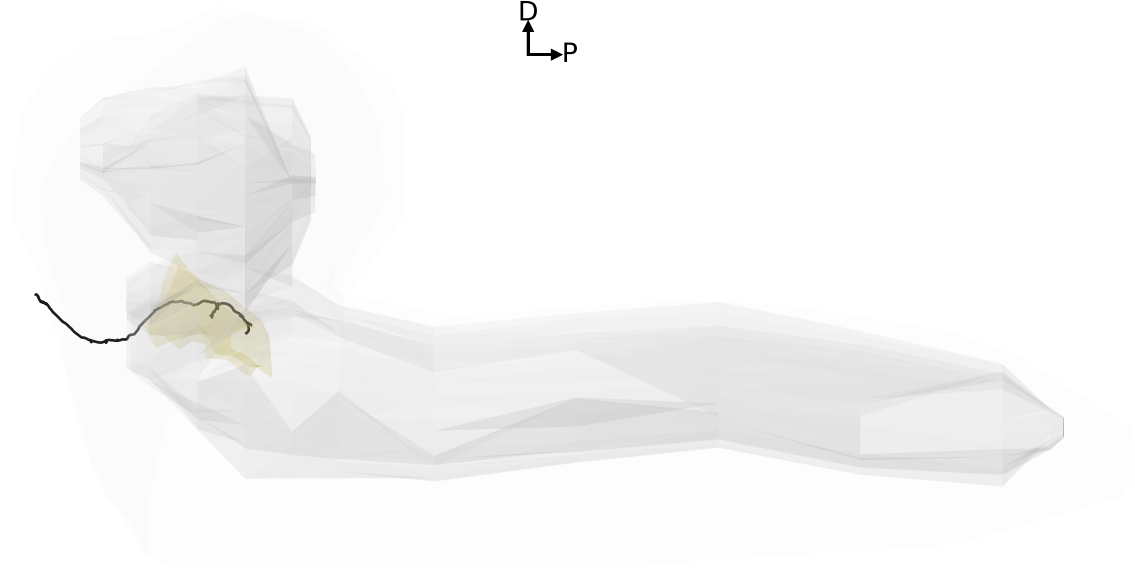

| <i>ID</i> | <i>name</i>         | SCACa | SCAVa | SCAVp | SCACal | SCACp | SCACpl | SCVM | IPCs | DMS | DH44 | Se0ens | Se0ph | PMN LR | MN motor neurons | PaN motor neurons | olfactory PNs | gustatory PNs | multiglomerular PNs | unknown PNs | thermo PNs | visual PNs |
|-----------|---------------------|-------|-------|-------|--------|-------|--------|------|------|-----|------|--------|-------|--------|------------------|-------------------|---------------|---------------|---------------------|-------------|------------|------------|
| 15592696  | AN-R-Sens-B2-ACp-11 | 0     | 0     | 0     | 0      | 1     | 0      | 0    | 0    | 0   | 0    | 0      | 0     | 0      | 0                | 0                 | 1             | 7             | 0                   | 0           | 0          | 0          |



ID: 15573283  
 name: AN-R-Sens-B2-ACp-13

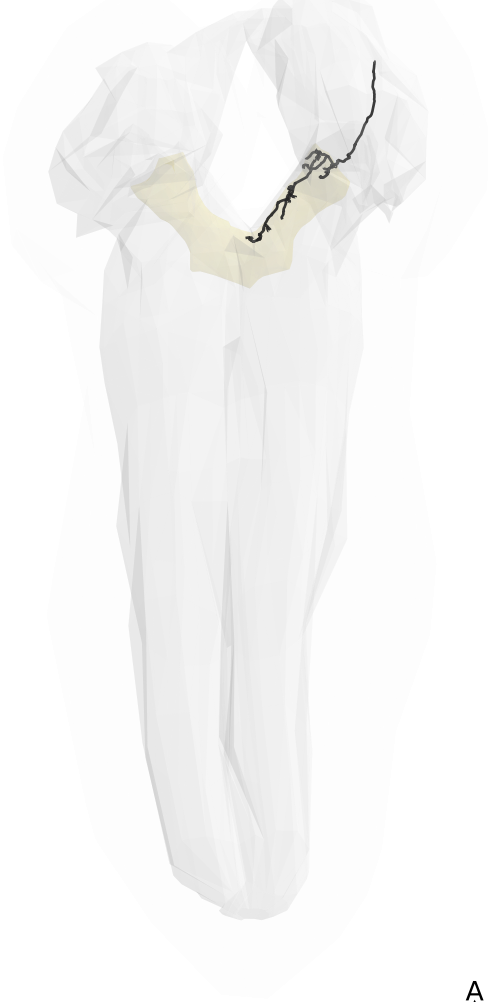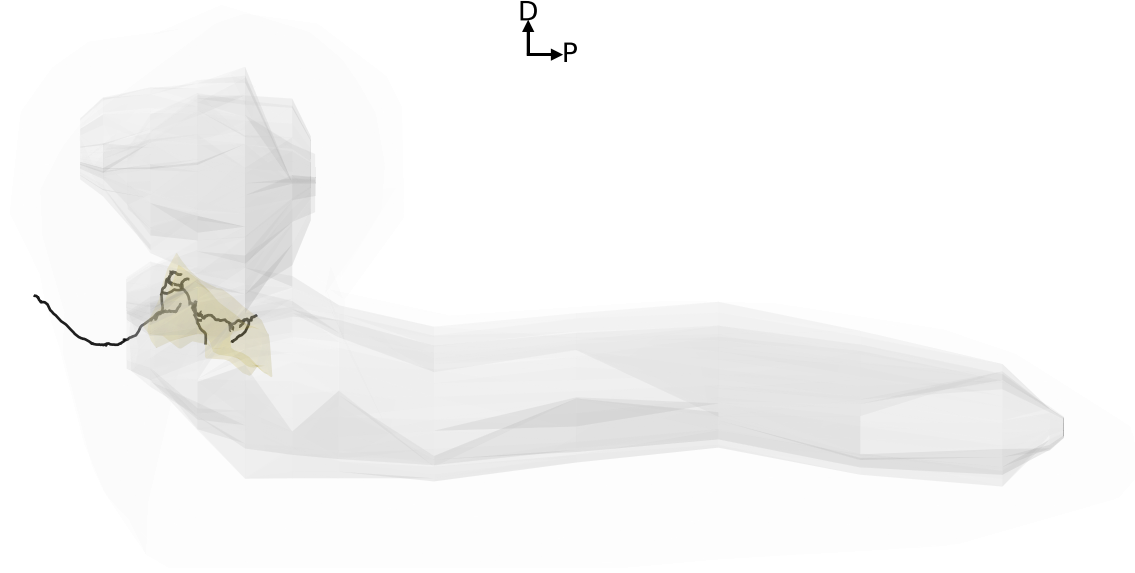

| <i>ID</i> | <i>name</i>         | SCACa | SCAVa | SCAVp | SCACal | SCACp | SCACpl | SCVM | IPCs | DMS | DH44 | Se0ens | Se0ph | PMN LR | MN motor neurons | PaN motor neurons | olfactory PNs | gustatory PNs | multiglomerular PNs | unknown PNs | thermo PNs | visual PNs |
|-----------|---------------------|-------|-------|-------|--------|-------|--------|------|------|-----|------|--------|-------|--------|------------------|-------------------|---------------|---------------|---------------------|-------------|------------|------------|
| 15573283  | AN-R-Sens-B2-ACp-13 | 1     | 0     | 0     | 0      | 5     | 0      | 0    | 0    | 0   | 1    | 0      | 0     | 0      | 0                | 0                 | 0             | 1             | 0                   | 0           | 0          | 0          |







ID: 15573331  
 name: AN-R-Sens-B2-ACp-16

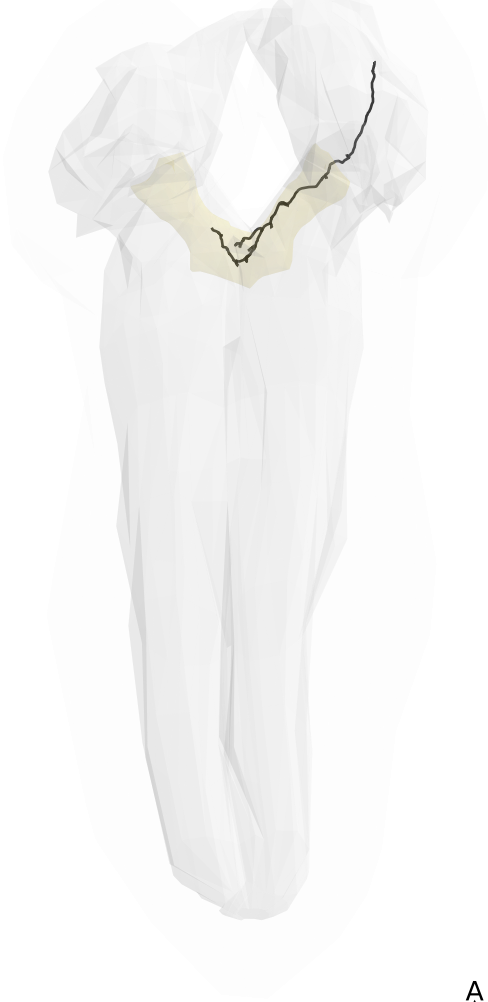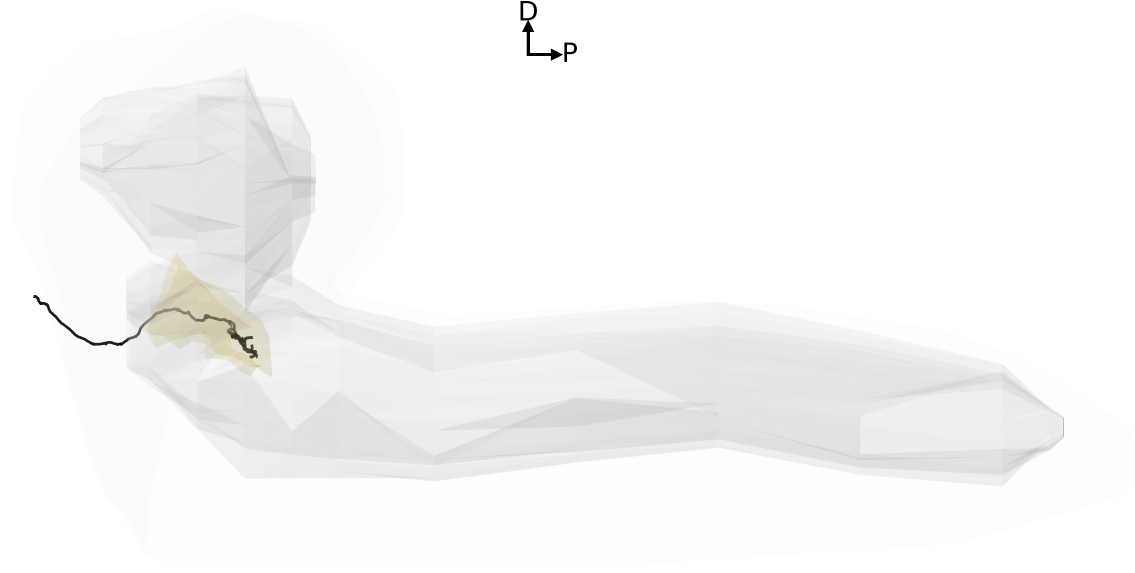

| <i>ID</i> | <i>name</i>         | SCACa | SCAVa | SCAVp | SCACal | SCACp | SCACpl | SCVM | IPCs | DMS | DH44 | Se0ens | Se0ph | PMN LR | MN motor neurons | PaN motor neurons | olfactory PNs | gustatory PNs | multiglomerular PNs | unknown PNs | thermo PNs | visual PNs |
|-----------|---------------------|-------|-------|-------|--------|-------|--------|------|------|-----|------|--------|-------|--------|------------------|-------------------|---------------|---------------|---------------------|-------------|------------|------------|
| 15573331  | AN-R-Sens-B2-ACp-16 | 0     | 0     | 0     | 0      | 1     | 0      | 0    | 0    | 0   | 1    | 0      | 0     | 0      | 0                | 0                 | 2             | 0             | 0                   | 0           | 0          | 0          |

ID: 15398807  
 name: AN-R-Sens-B2-ACp-17

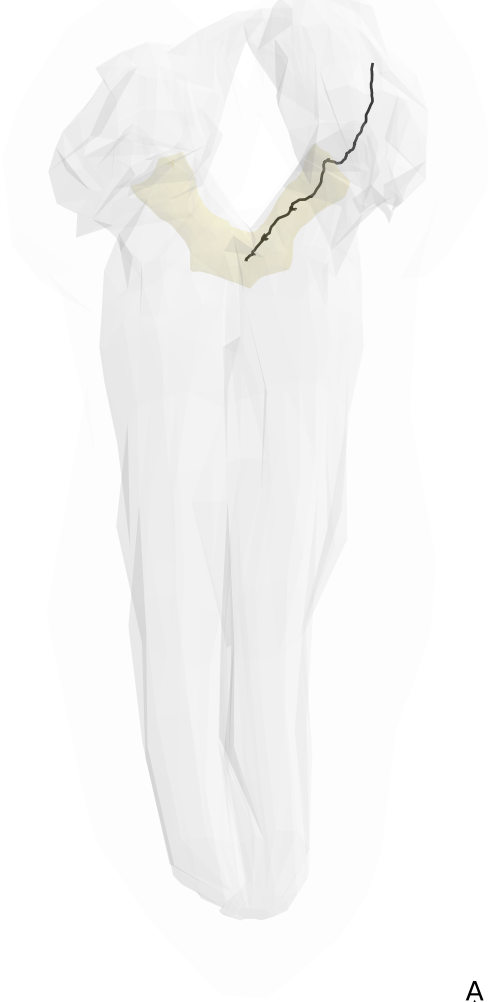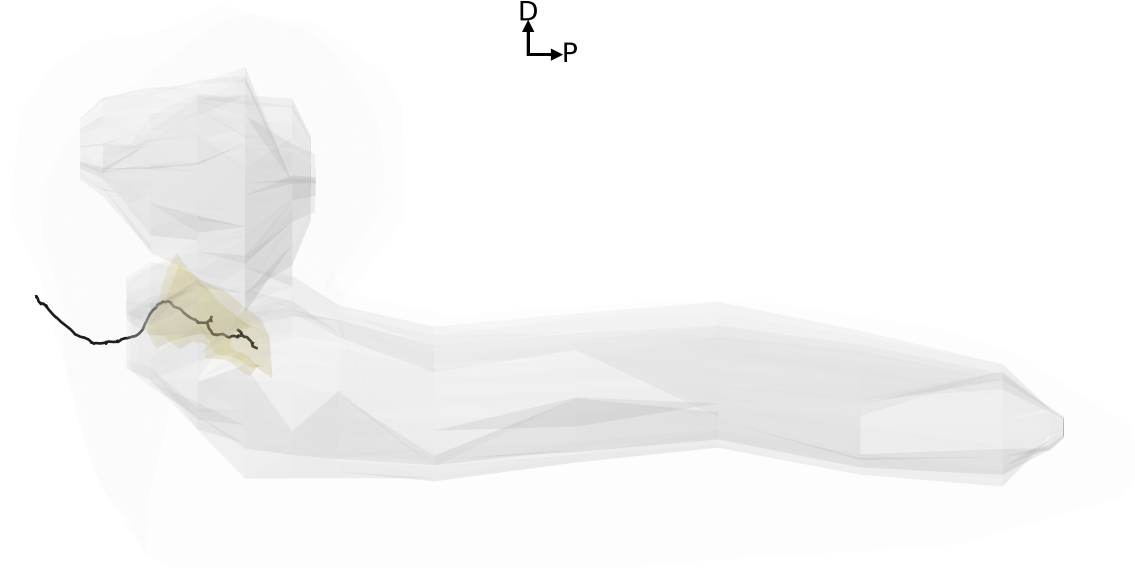

| <i>ID</i> | <i>name</i>         | SCACa | SCAVa | SCAVp | SCACal | SCACp | SCACpl | SCVM | IPCs | DMS | DH44 | Se0ens | Se0ph | PMN LR | MN motor neurons | PaN motor neurons | olfactory PNs | gustatory PNs | multiglomerular PNs | unknown PNs | thermo PNs | visual PNs |
|-----------|---------------------|-------|-------|-------|--------|-------|--------|------|------|-----|------|--------|-------|--------|------------------|-------------------|---------------|---------------|---------------------|-------------|------------|------------|
| 15398807  | AN-R-Sens-B2-ACp-17 | 0     | 0     | 0     | 0      | 2     | 0      | 0    | 0    | 0   | 0    | 0      | 0     | 0      | 0                | 0                 | 0             | 5             | 0                   | 0           | 0          | 0          |

ID: 15506094  
 name: AN-R-Sens-B2-ACp-18

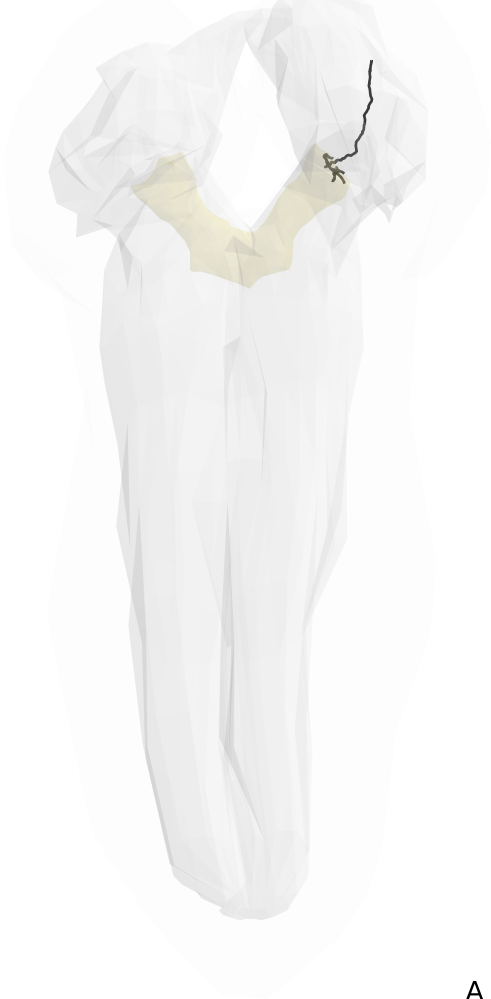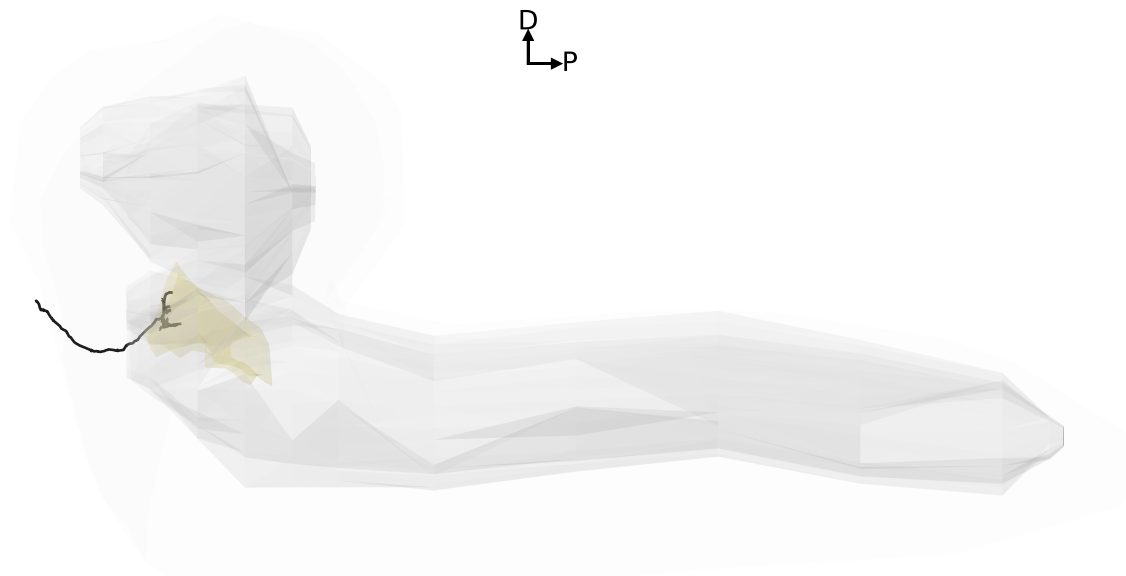

| <i>ID</i> | <i>name</i>         | SCACa | SCAVa | SCAVp | SCACal | SCACp | SCACpl | SCVM | IPCs | DMS | DH44 | Se0ens | Se0ph | PMN LR | MN motor neurons | PaN motor neurons | olfactory PNs | gustatory PNs | multiglomerular PNs | unknown PNs | thermo PNs | visual PNs |
|-----------|---------------------|-------|-------|-------|--------|-------|--------|------|------|-----|------|--------|-------|--------|------------------|-------------------|---------------|---------------|---------------------|-------------|------------|------------|
| 15506094  | AN-R-Sens-B2-ACp-18 | 0     | 0     | 0     | 0      | 2     | 0      | 0    | 0    | 0   | 0    | 0      | 0     | 0      | 0                | 0                 | 0             | 1             | 1                   | 0           | 0          | 0          |

ID: 15541976  
 name: AN-R-Sens-B2-ACp-19

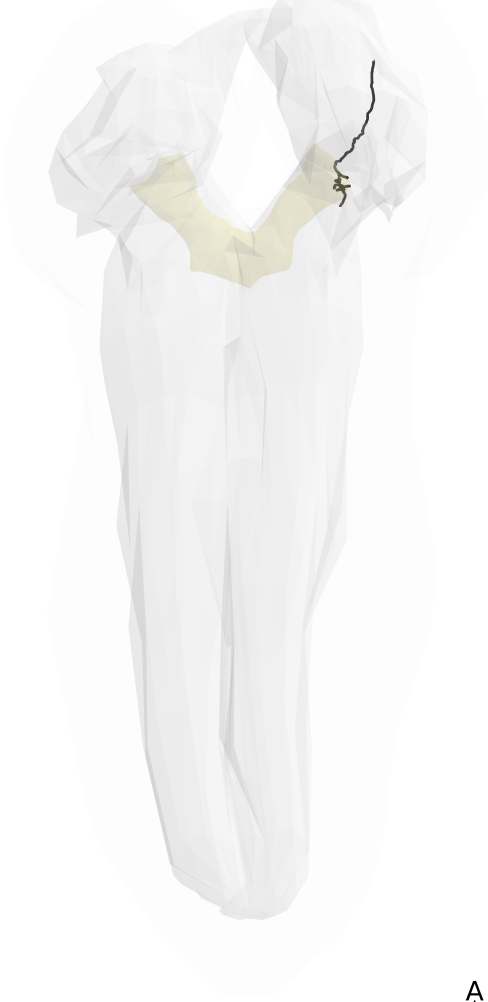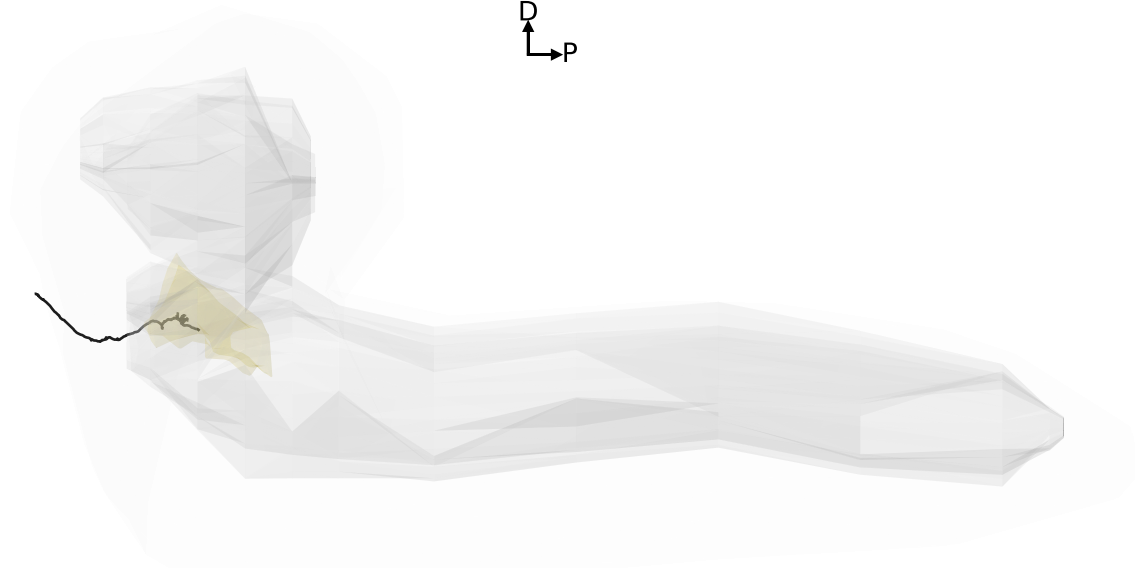

| <i>ID</i> | <i>name</i>         | SCACa | SCAVa | SCAVp | SCACal | SCACp | SCACpl | SCVM | IPCs | DMS | DH44 | Se0ens | Se0ph | PMN LR | MN motor neurons | PaN motor neurons | olfactory PNs | gustatory PNs | multiglomerular PNs | unknown PNs | thermo PNs | visual PNs |
|-----------|---------------------|-------|-------|-------|--------|-------|--------|------|------|-----|------|--------|-------|--------|------------------|-------------------|---------------|---------------|---------------------|-------------|------------|------------|
| 15541976  | AN-R-Sens-B2-ACp-19 | 0     | 0     | 0     | 0      | 2     | 0      | 0    | 0    | 0   | 0    | 0      | 0     | 0      | 0                | 0                 | 0             | 0             | 5                   | 0           | 0          | 0          |

ID: 15507888  
 name: AN-R-Sens-B2-ACp-20

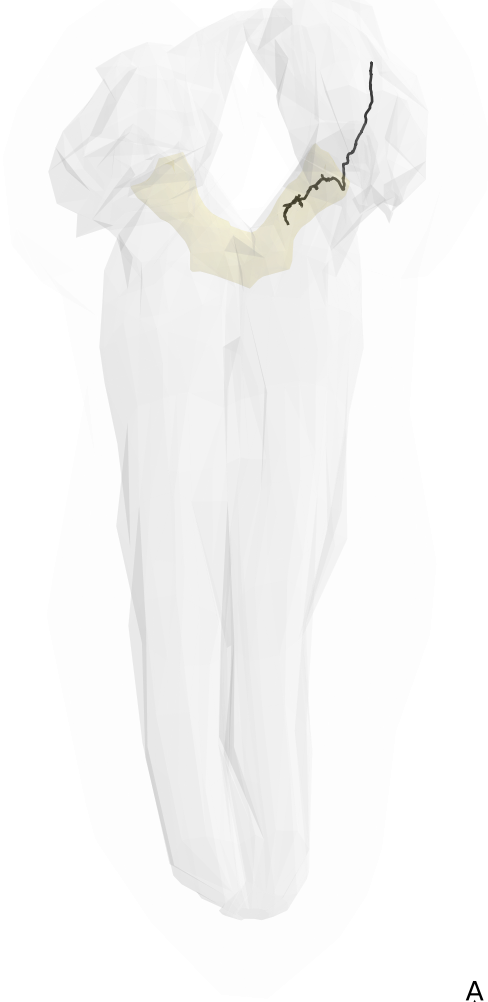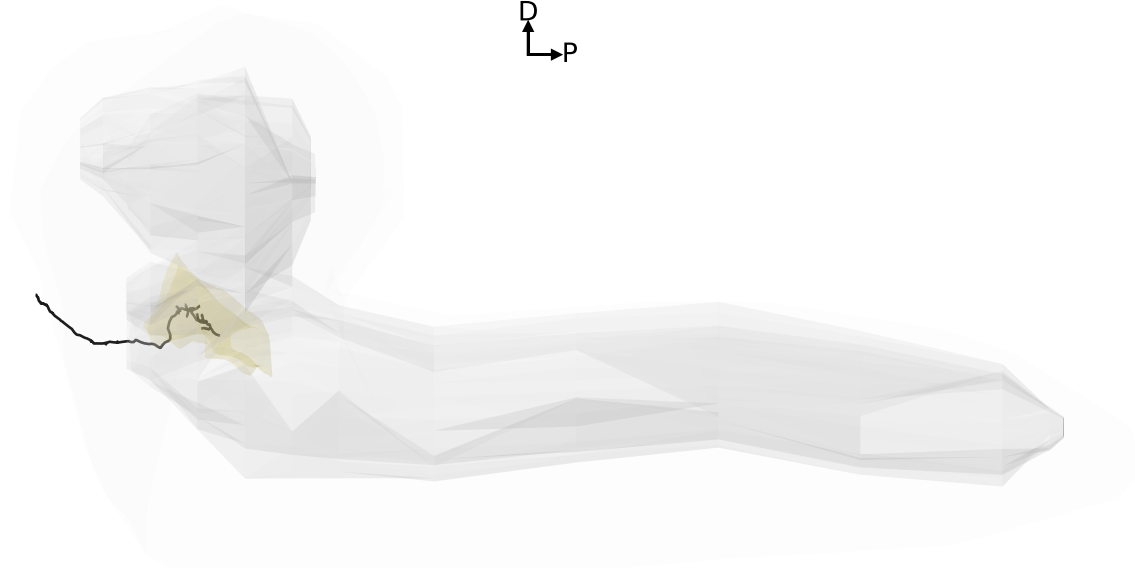

| <i>ID</i> | <i>name</i>         | SCACa | SCAVa | SCAVp | SCACal | SCACp | SCACpl | SCVM | IPCs | DMS | DH44 | Se0ens | Se0ph | PMN LR | MN motor neurons | PaN motor neurons | olfactory PNs | gustatory PNs | multiglomerular PNs | unknown PNs | thermo PNs | visual PNs |
|-----------|---------------------|-------|-------|-------|--------|-------|--------|------|------|-----|------|--------|-------|--------|------------------|-------------------|---------------|---------------|---------------------|-------------|------------|------------|
| 15507888  | AN-R-Sens-B2-ACp-20 | 0     | 0     | 0     | 0      | 1     | 0      | 0    | 0    | 0   | 0    | 0      | 0     | 0      | 0                | 0                 | 1             | 0             | 0                   | 0           | 0          | 0          |

ID: 15522777  
 name: AN-R-Sens-B2-ACp-21

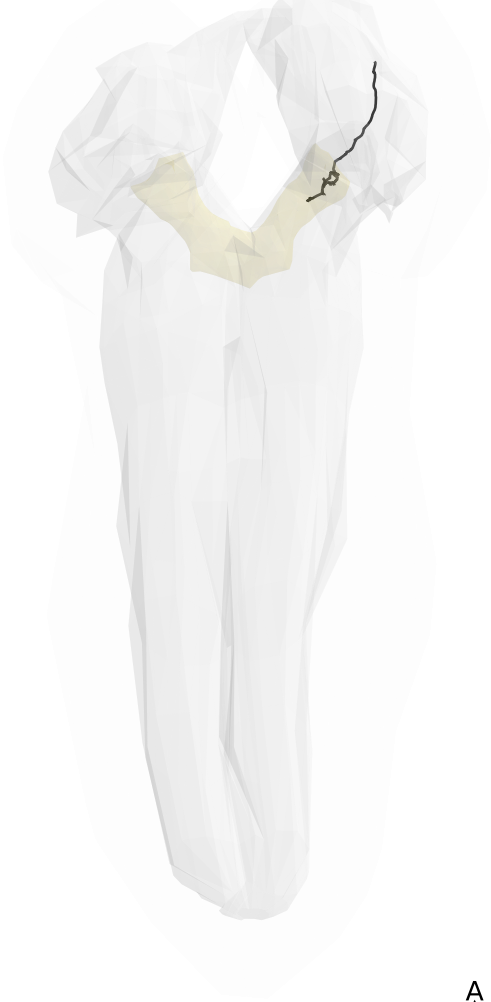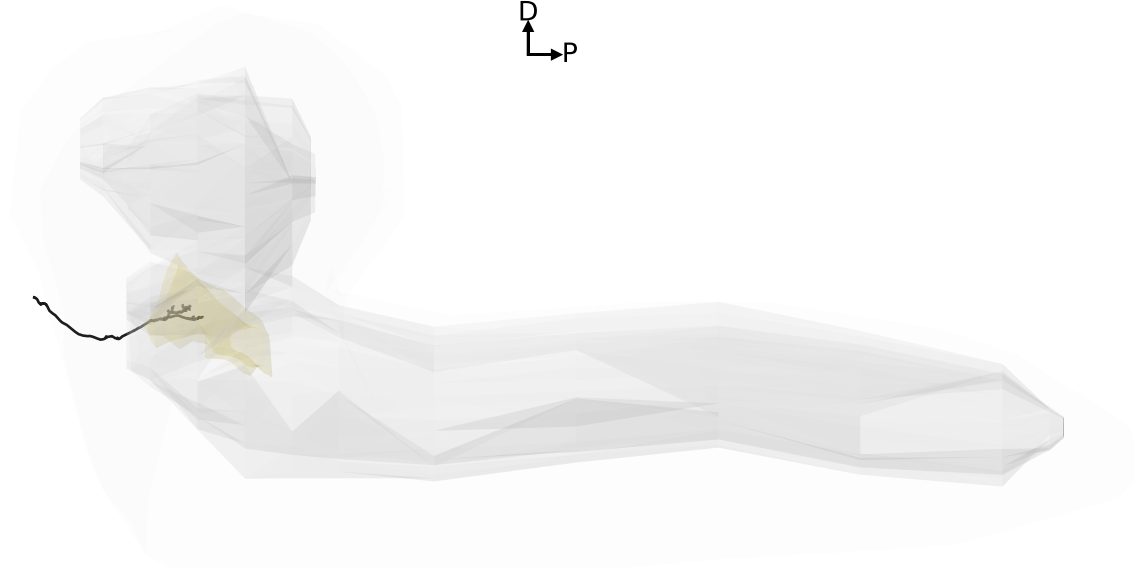

| <i>ID</i> | <i>name</i>         | SCACa | SCAVa | SCAVp | SCACal | SCACp | SCACpl | SCVM | IPCs | DMS | DH44 | Se0ens | Se0ph | PMN LR | MN motor neurons | PaN motor neurons | olfactory PNs | gustatory PNs | multiglomerular PNs | unknown PNs | thermo PNs | visual PNs |
|-----------|---------------------|-------|-------|-------|--------|-------|--------|------|------|-----|------|--------|-------|--------|------------------|-------------------|---------------|---------------|---------------------|-------------|------------|------------|
| 15522777  | AN-R-Sens-B2-ACp-21 | 0     | 0     | 0     | 0      | 1     | 0      | 0    | 0    | 0   | 0    | 0      | 0     | 0      | 0                | 0                 | 9             | 8             | 2                   | 0           | 0          | 0          |









ID: 9853425  
 name: AN-R-Sens-B3-ACp-09

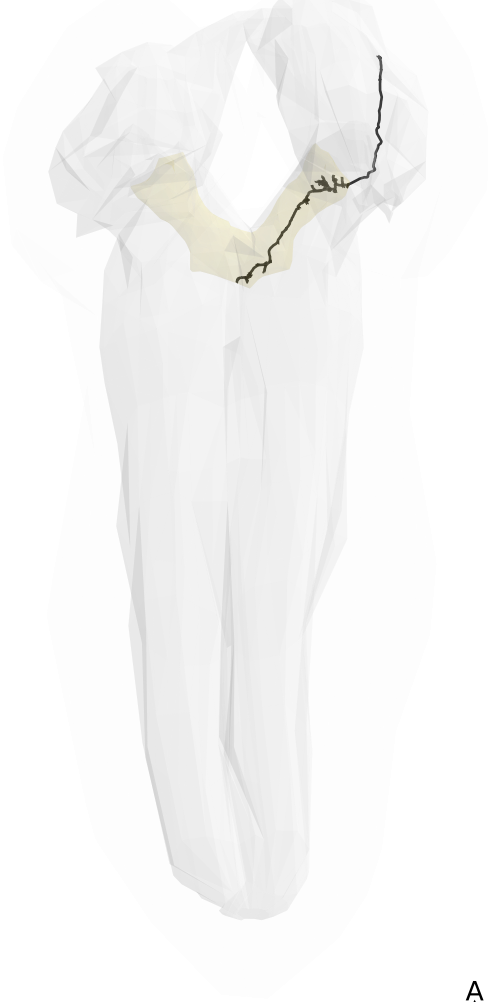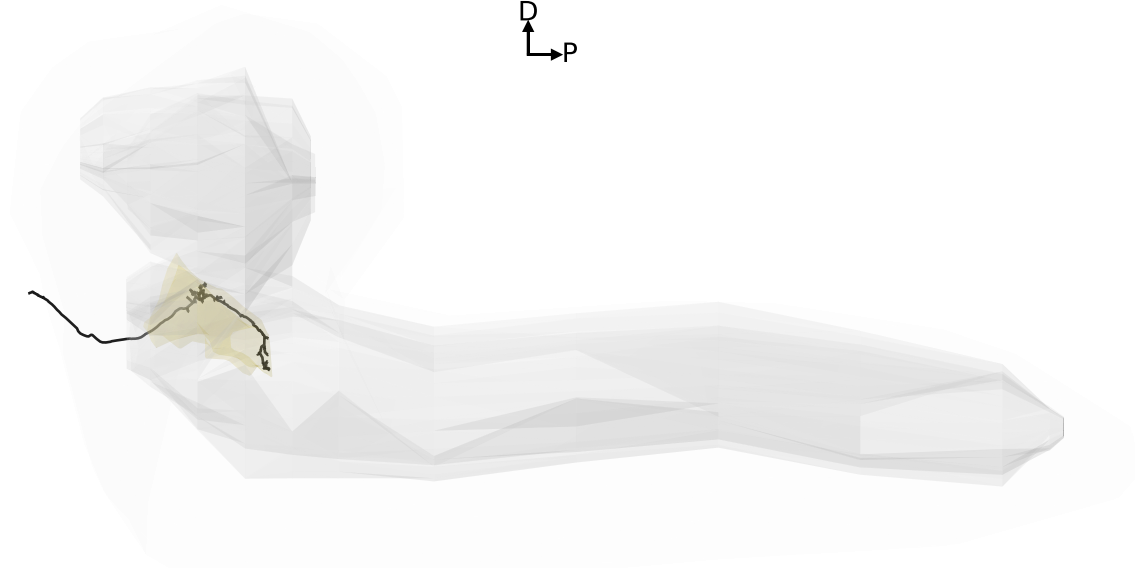

| <i>ID</i> | <i>name</i>         | SCACa | SCAVa | SCAVp | SCACal | SCACp | SCACpl | SCVM | IPCs | DMS | DH44 | Se0ens | Se0ph | PMN LR | MN motor neurons | PaN motor neurons | olfactory PNs | gustatory PNs | multiglomerular PNs | unknown PNs | thermo PNs | visual PNs |
|-----------|---------------------|-------|-------|-------|--------|-------|--------|------|------|-----|------|--------|-------|--------|------------------|-------------------|---------------|---------------|---------------------|-------------|------------|------------|
| 9853425   | AN-R-Sens-B3-ACp-09 | 0     | 0     | 0     | 1      | 3     | 0      | 0    | 0    | 0   | 0    | 0      | 0     | 0      | 0                | 0                 | 5             | 2             | 3                   | 0           | 0          | 0          |

ID: 4338596  
name: MN-L-Sens-B2-ACp-01

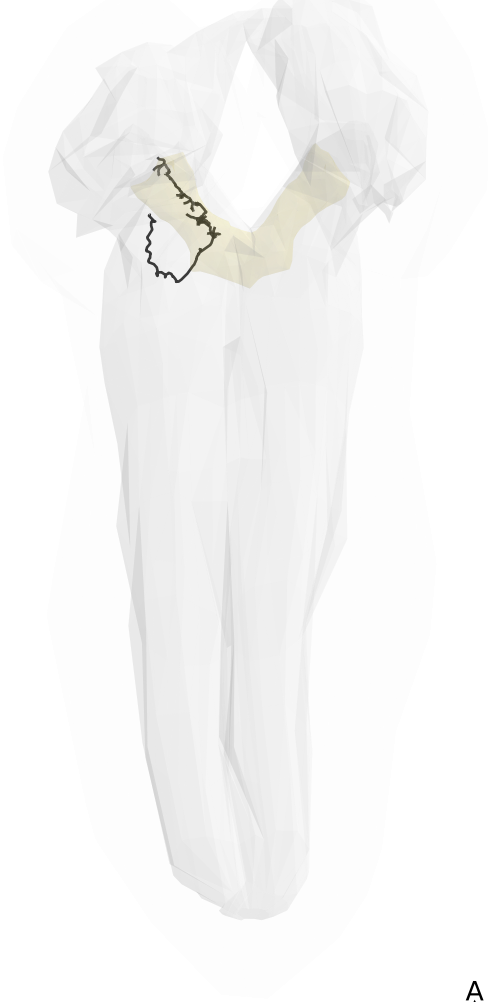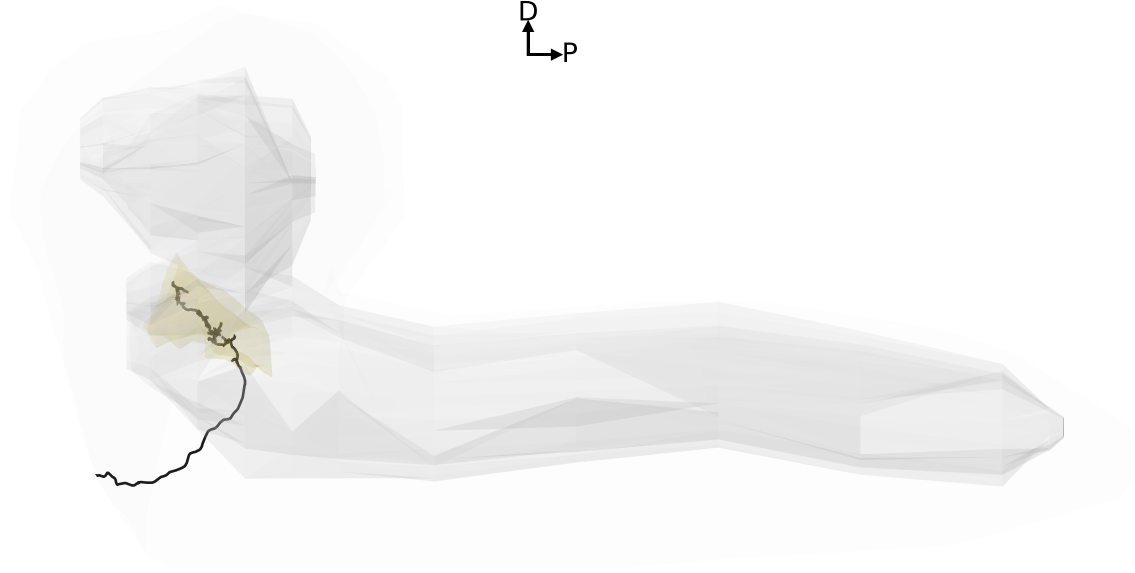

| <i>ID</i> | <i>name</i>         | SCACa | SCAVa | SCAVp | SCACal | SCACp | SCACpl | SCVM | IPCs | DMS | DH44 | Se0ens | Se0ph | PMN LR | MN motor neurons | PaN motor neurons | olfactory PNs | gustatory PNs | multiglomerular PNs | unknown PNs | thermo PNs | visual PNs |
|-----------|---------------------|-------|-------|-------|--------|-------|--------|------|------|-----|------|--------|-------|--------|------------------|-------------------|---------------|---------------|---------------------|-------------|------------|------------|
| 4338596   | MN-L-Sens-B2-ACp-01 | 0     | 0     | 0     | 0      | 11    | 0      | 0    | 0    | 0   | 0    | 0      | 0     | 0      | 0                | 0                 | 1             | 44            | 1                   | 0           | 0          | 0          |

ID: 15716701  
 name: MN-L-Sens-B2-ACp-02

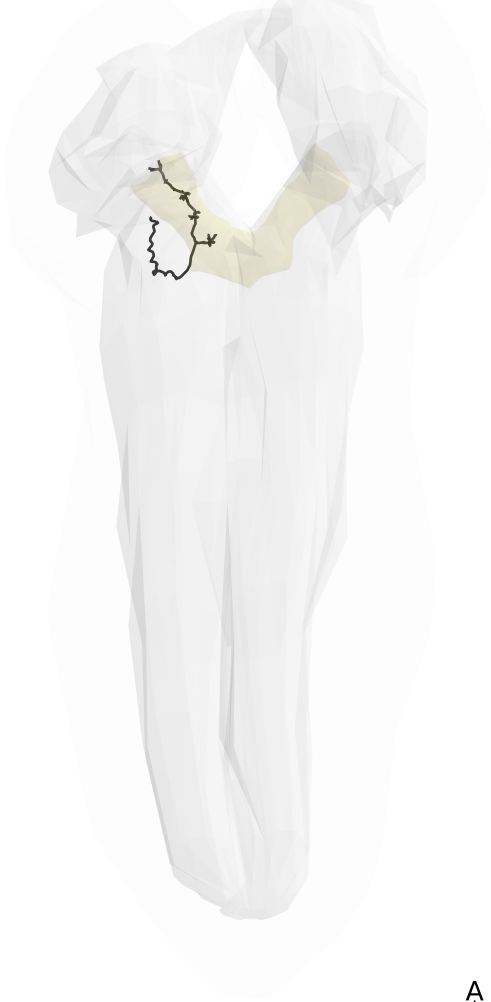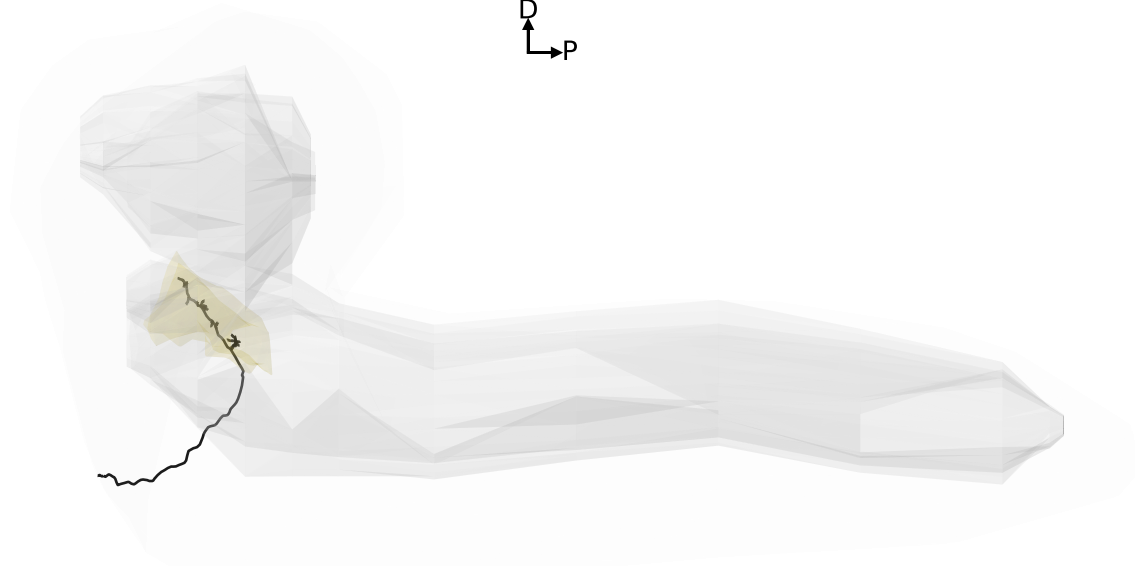

| <i>ID</i> | <i>name</i>         | SCACa | SCAVa | SCAVp | SCACal | SCACp | SCACpl | SCVM | IPCs | DMS | DH44 | Se0ens | Se0ph | PMN LR | MN motor neurons | PaN motor neurons | olfactory PNs | gustatory PNs | multiglomerular PNs | unknown PNs | thermo PNs | visual PNs |
|-----------|---------------------|-------|-------|-------|--------|-------|--------|------|------|-----|------|--------|-------|--------|------------------|-------------------|---------------|---------------|---------------------|-------------|------------|------------|
| 15716701  | MN-L-Sens-B2-ACp-02 | 0     | 0     | 0     | 0      | 0     | 0      | 0    | 0    | 0   | 0    | 0      | 0     | 0      | 0                | 0                 | 0             | 19            | 6                   | 0           | 0          | 0          |

ID: 15716309  
 name: MN-L-Sens-B2-ACp-03

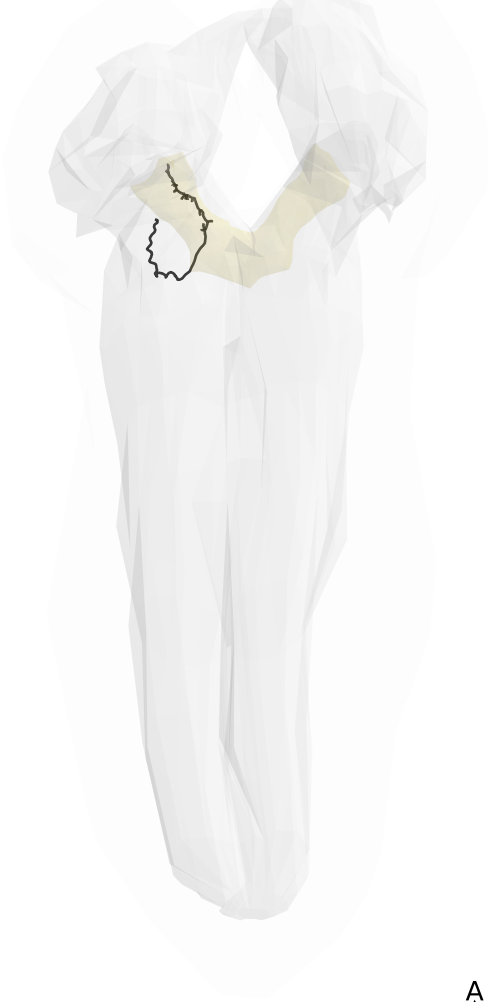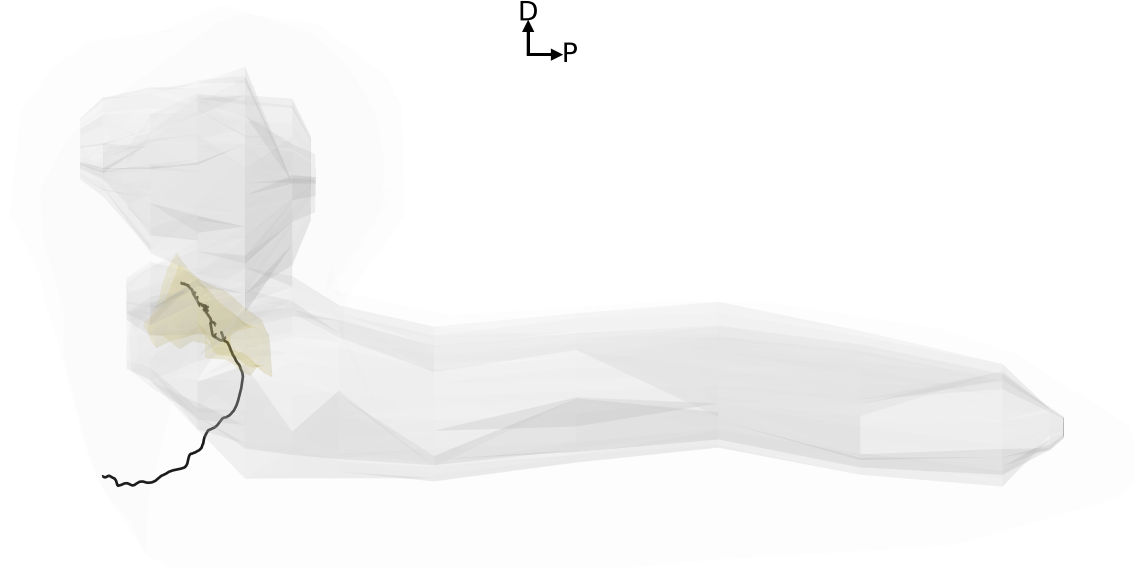

| <i>ID</i> | <i>name</i>         | SCACa | SCAVa | SCAVp | SCACal | SCACp | SCACpl | SCVM | IPCs | DMS | DH44 | Se0ens | Se0ph | PMN LR | MN motor neurons | PaN motor neurons | olfactory PNs | gustatory PNs | multiglomerular PNs | unknown PNs | thermo PNs | visual PNs |
|-----------|---------------------|-------|-------|-------|--------|-------|--------|------|------|-----|------|--------|-------|--------|------------------|-------------------|---------------|---------------|---------------------|-------------|------------|------------|
| 15716309  | MN-L-Sens-B2-ACp-03 | 0     | 0     | 0     | 0      | 4     | 0      | 0    | 0    | 0   | 0    | 0      | 0     | 0      | 0                | 0                 | 0             | 10            | 7                   | 0           | 0          | 0          |

ID: 15715643  
 name: MN-L-Sens-B2-ACp-04

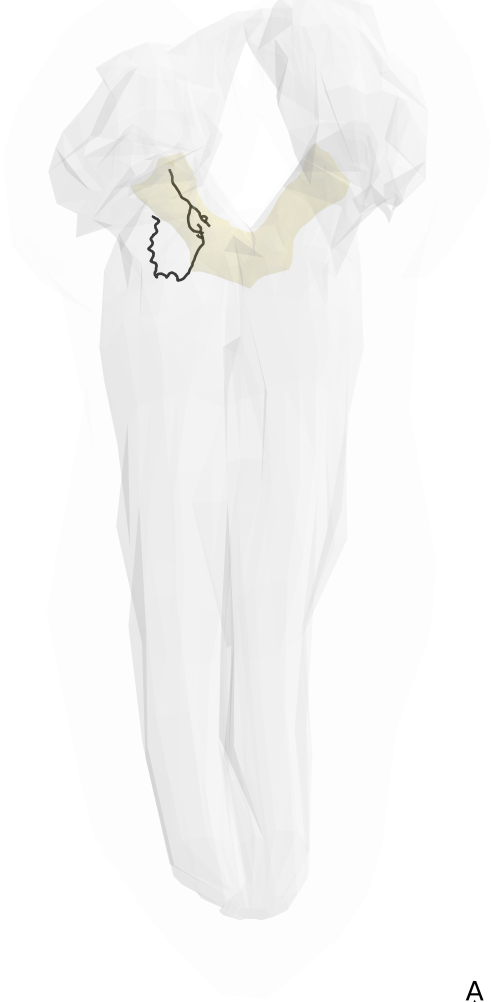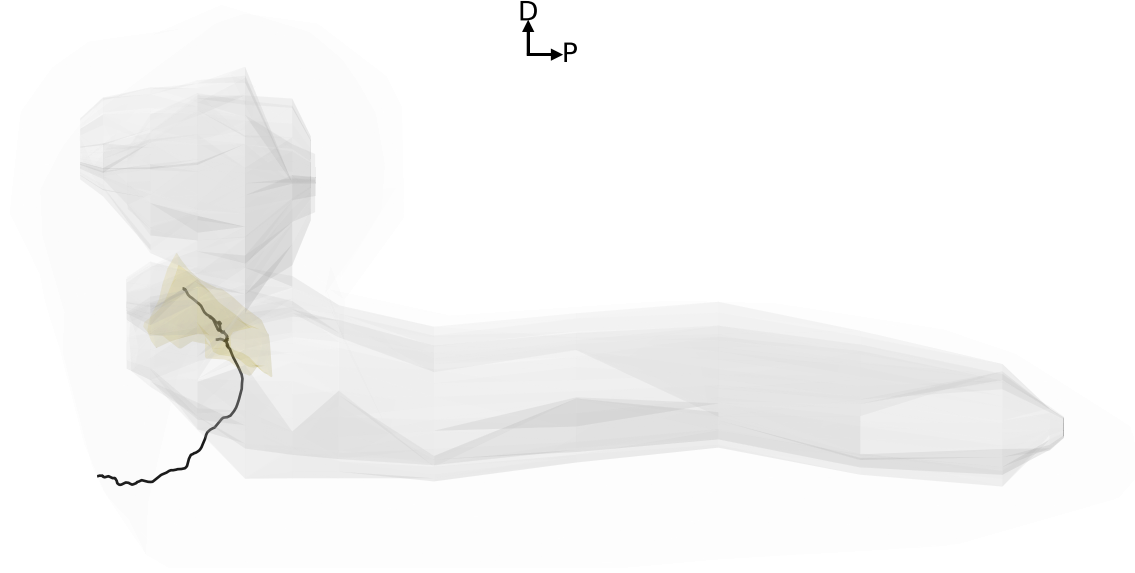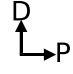

| <i>ID</i> | <i>name</i>         | SCACa | SCAVa | SCAVp | SCACal | SCACp | SCACpl | SCVM | IPCs | DMS | DH44 | Se0ens | Se0ph | PMN LR | MN motor neurons | PaN motor neurons | olfactory PNs | gustatory PNs | multiglomerular PNs | unknown PNs | thermo PNs | visual PNs |
|-----------|---------------------|-------|-------|-------|--------|-------|--------|------|------|-----|------|--------|-------|--------|------------------|-------------------|---------------|---------------|---------------------|-------------|------------|------------|
| 15715643  | MN-L-Sens-B2-ACp-04 | 0     | 0     | 0     | 0      | 5     | 0      | 0    | 0    | 0   | 0    | 0      | 0     | 0      | 0                | 0                 | 0             | 7             | 0                   | 0           | 0          | 0          |

ID: 15716094  
 name: MN-L-Sens-B2-ACp-05

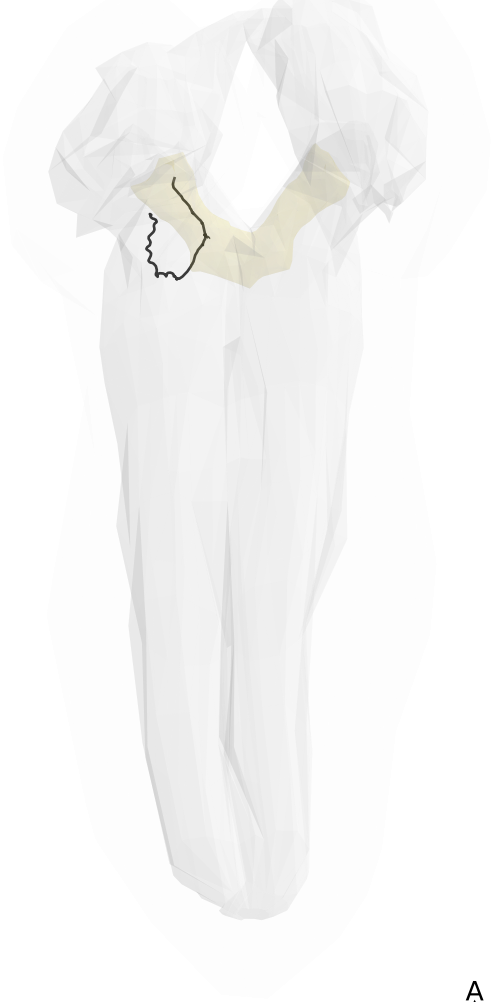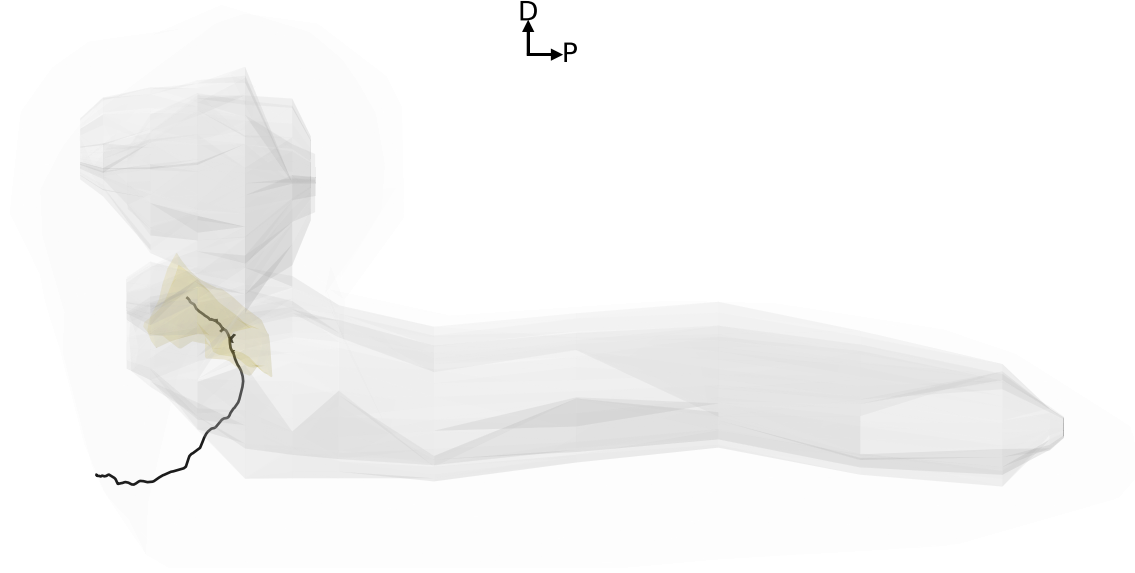

| <i>ID</i> | <i>name</i>         | SCACa | SCAVa | SCAVp | SCACal | SCACp | SCACpl | SCVM | IPCs | DMS | DH44 | Se0ens | Se0ph | PMN LR | MN motor neurons | PaN motor neurons | olfactory PNs | gustatory PNs | multiglomerular PNs | unknown PNs | thermo PNs | visual PNs |
|-----------|---------------------|-------|-------|-------|--------|-------|--------|------|------|-----|------|--------|-------|--------|------------------|-------------------|---------------|---------------|---------------------|-------------|------------|------------|
| 15716094  | MN-L-Sens-B2-ACp-05 | 0     | 0     | 0     | 0      | 4     | 0      | 0    | 0    | 0   | 0    | 0      | 0     | 0      | 0                | 0                 | 0             | 0             | 1                   | 0           | 0          | 0          |

ID: 12260696  
 name: MN-L-Sens-B2-ACp-06

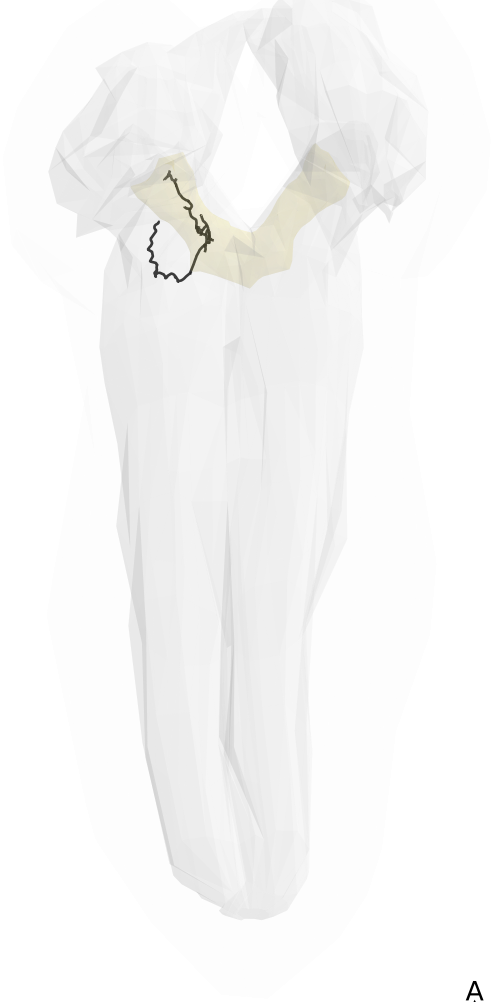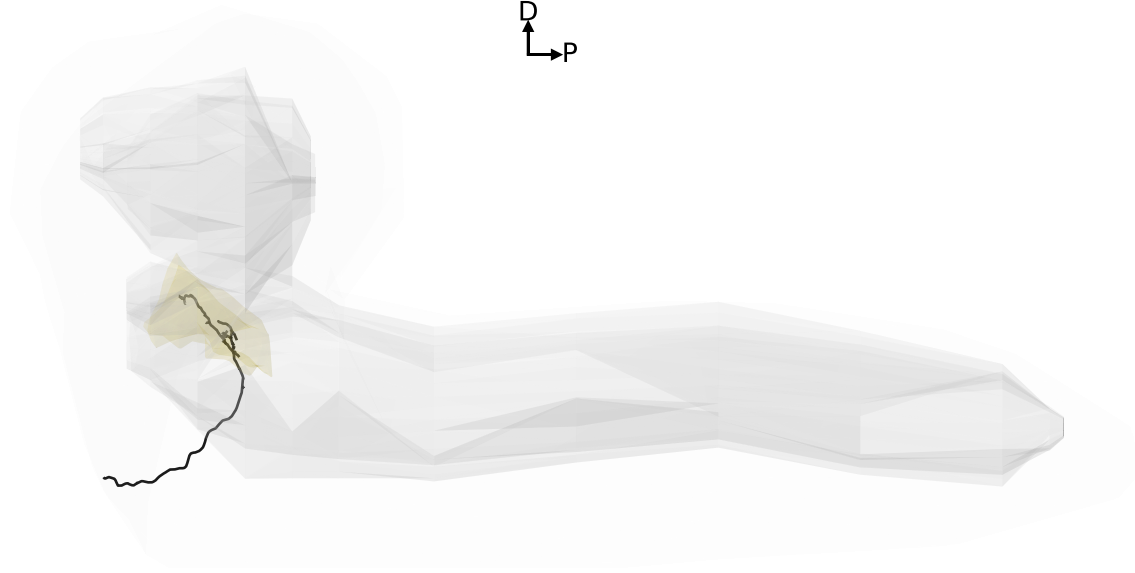

| <i>ID</i> | <i>name</i>         | SCACa | SCAVa | SCAVp | SCACal | SCACp | SCACpl | SCVM | IPCs | DMS | DH44 | Se0ens | Se0ph | PMN LR | MN motor neurons | PaN motor neurons | olfactory PNs | gustatory PNs | multiglomerular PNs | unknown PNs | thermo PNs | visual PNs |
|-----------|---------------------|-------|-------|-------|--------|-------|--------|------|------|-----|------|--------|-------|--------|------------------|-------------------|---------------|---------------|---------------------|-------------|------------|------------|
| 12260696  | MN-L-Sens-B2-ACp-06 | 0     | 0     | 0     | 0      | 7     | 0      | 0    | 0    | 0   | 0    | 0      | 0     | 0      | 0                | 0                 | 0             | 9             | 0                   | 0           | 0          | 0          |



ID: 11745381  
 name: MN-L-Sens-B2-ACp-07

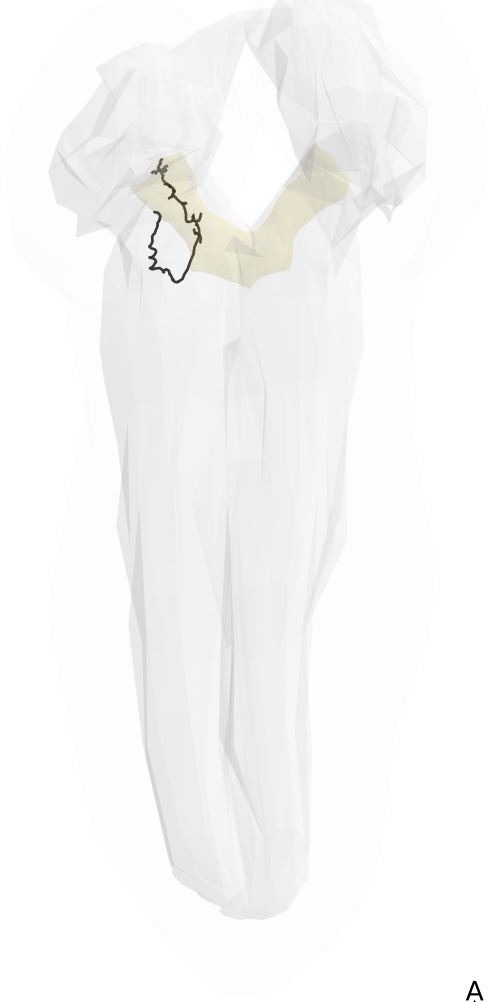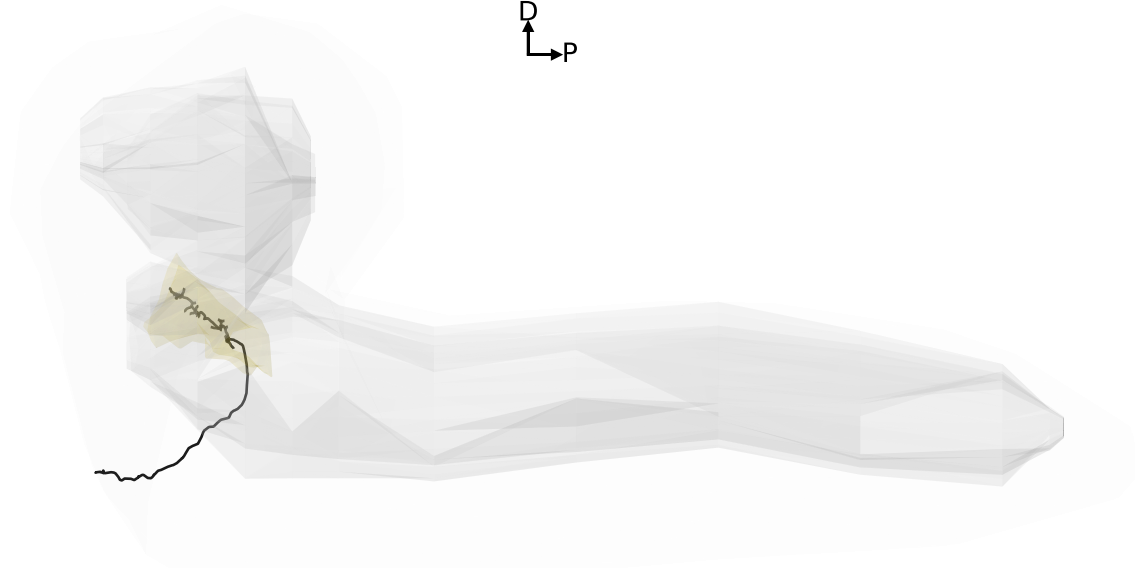

| <i>ID</i> | <i>name</i>         | SCACa | SCAVa | SCAVp | SCACal | SCACp | SCACpl | SCVM | IPCs | DMS | DH44 | Se0ens | Se0ph | PMN LR | MN motor neurons | PaN motor neurons | olfactory PNs | gustatory PNs | multiglomerular PNs | unknown PNs | thermo PNs | visual PNs |
|-----------|---------------------|-------|-------|-------|--------|-------|--------|------|------|-----|------|--------|-------|--------|------------------|-------------------|---------------|---------------|---------------------|-------------|------------|------------|
| 11745381  | MN-L-Sens-B2-ACp-07 | 0     | 0     | 0     | 0      | 1     | 0      | 0    | 0    | 0   | 0    | 0      | 0     | 0      | 0                | 0                 | 0             | 12            | 6                   | 0           | 0          | 0          |

ID: 15938337  
 name: MN-L-Sens-B2-ACp-08

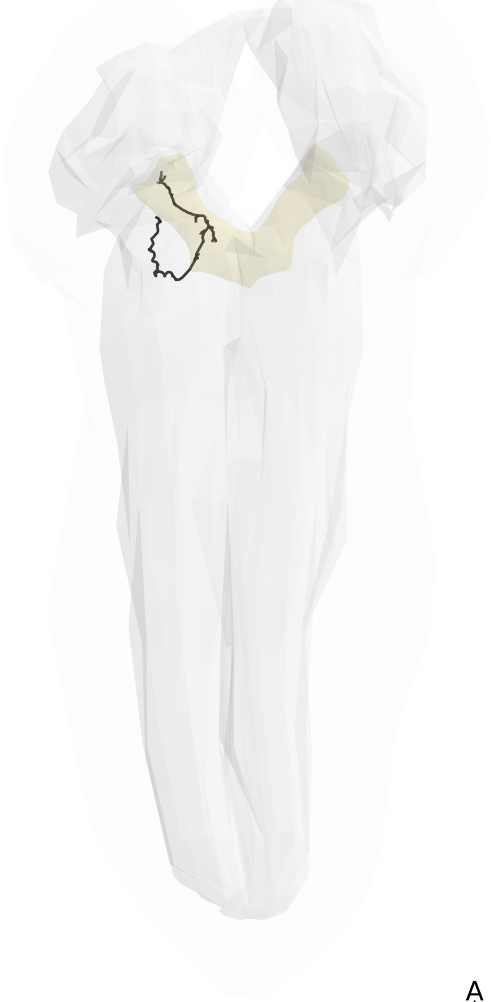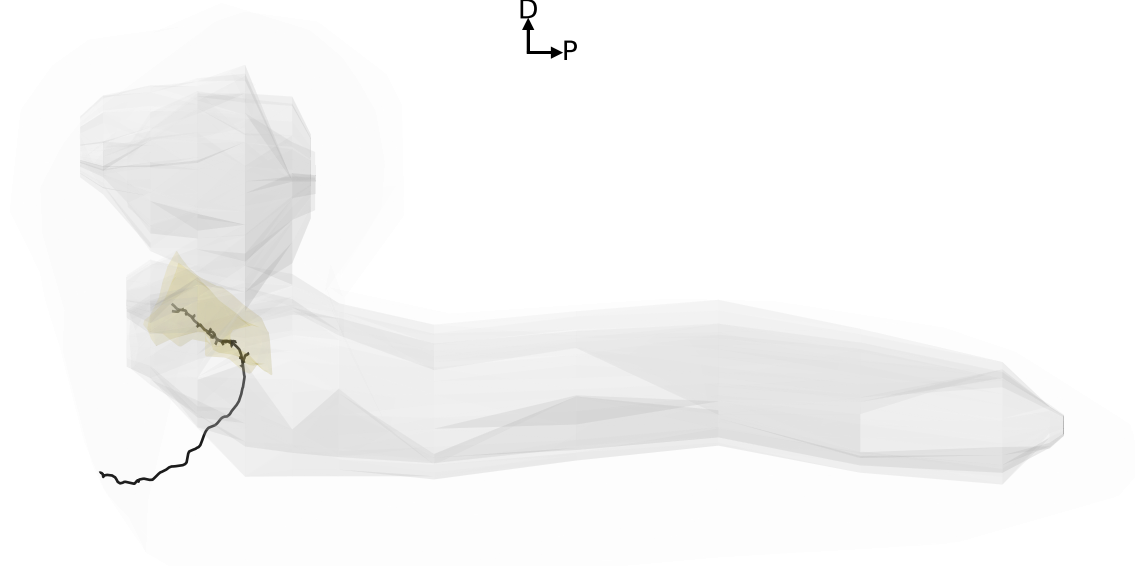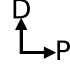

| <i>ID</i> | <i>name</i>         | SCACa | SCAVa | SCAVp | SCACal | SCACp | SCACpl | SCVM | IPCs | DMS | DH44 | Se0ens | Se0ph | PMN LR | MN motor neurons | PaN motor neurons | olfactory PNs | gustatory PNs | multiglomerular PNs | unknown PNs | thermo PNs | visual PNs |
|-----------|---------------------|-------|-------|-------|--------|-------|--------|------|------|-----|------|--------|-------|--------|------------------|-------------------|---------------|---------------|---------------------|-------------|------------|------------|
| 15938337  | MN-L-Sens-B2-ACp-08 | 0     | 0     | 0     | 0      | 5     | 0      | 0    | 0    | 0   | 0    | 0      | 0     | 0      | 0                | 0                 | 1             | 1             | 3                   | 0           | 0          | 0          |

ID: 15690093  
 name: MN-L-Sens-B2-ACp-09

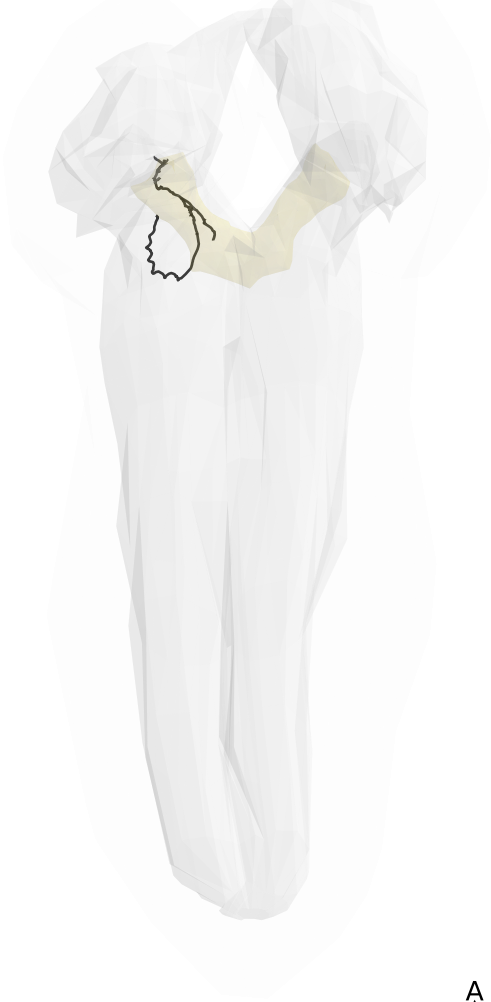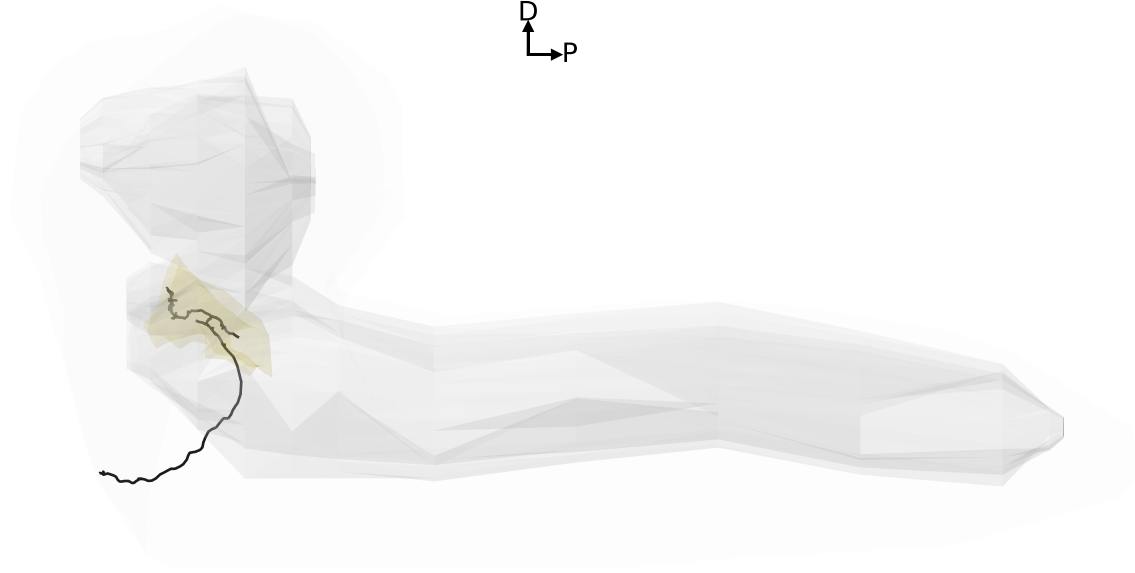

| <i>ID</i> | <i>name</i>         | SCACa | SCAVa | SCAVp | SCACal | SCACp | SCACpl | SCVM | IPCs | DMS | DH44 | Se0ens | Se0ph | PMN LR | MN motor neurons | PaN motor neurons | olfactory PNs | gustatory PNs | multiglomerular PNs | unknown PNs | thermo PNs | visual PNs |
|-----------|---------------------|-------|-------|-------|--------|-------|--------|------|------|-----|------|--------|-------|--------|------------------|-------------------|---------------|---------------|---------------------|-------------|------------|------------|
| 15690093  | MN-L-Sens-B2-ACp-09 | 0     | 0     | 0     | 0      | 7     | 0      | 0    | 0    | 0   | 0    | 0      | 0     | 0      | 0                | 0                 | 2             | 33            | 8                   | 0           | 0          | 0          |

ID: 15679577  
 name: MN-L-Sens-B2-ACp-10

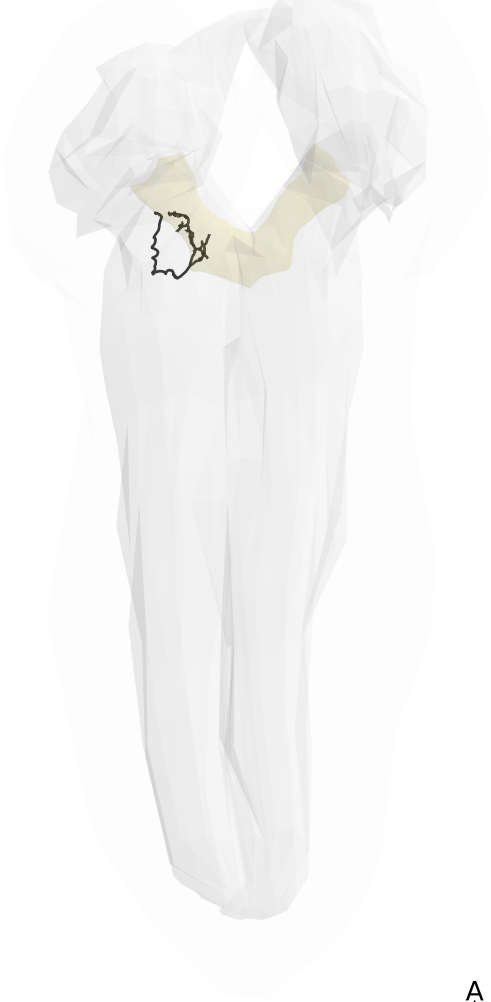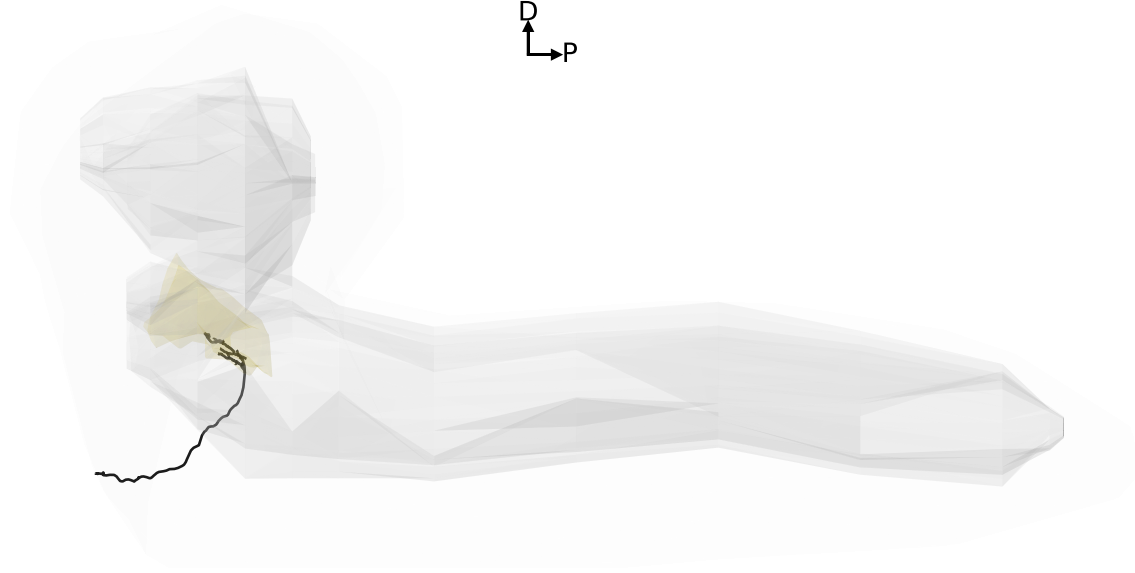

| <i>ID</i> | <i>name</i>         | SCACa | SCAVa | SCAVp | SCACal | SCACp | SCACpl | SCVM | IPCs | DMS | DH44 | Se0ens | Se0ph | PMN LR | MN motor neurons | PaN motor neurons | olfactory PNs | gustatory PNs | multiglomerular PNs | unknown PNs | thermo PNs | visual PNs |
|-----------|---------------------|-------|-------|-------|--------|-------|--------|------|------|-----|------|--------|-------|--------|------------------|-------------------|---------------|---------------|---------------------|-------------|------------|------------|
| 15679577  | MN-L-Sens-B2-ACp-10 | 0     | 0     | 0     | 0      | 1     | 0      | 0    | 0    | 0   | 0    | 0      | 0     | 0      | 0                | 0                 | 0             | 0             | 31                  | 0           | 0          | 0          |

ID: 15674262  
 name: MN-L-Sens-B2-ACp-11

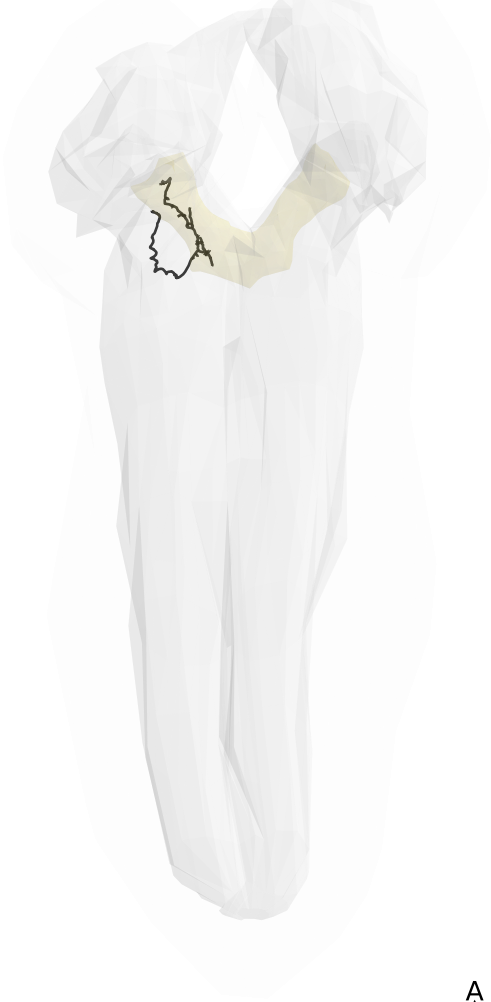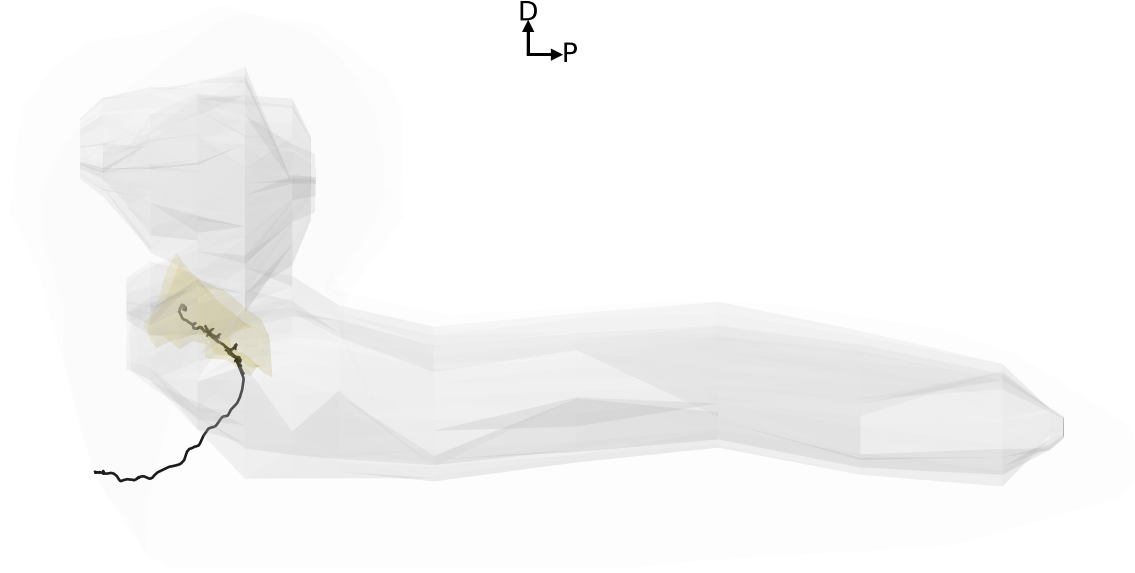

| <i>ID</i> | <i>name</i>         | SCACa | SCAVa | SCAVp | SCACal | SCACp | SCACpl | SCVM | IPCs | DMS | DH44 | Se0ens | Se0ph | PMN LR | MN motor neurons | PaN motor neurons | olfactory PNs | gustatory PNs | multiglomerular PNs | unknown PNs | thermo PNs | visual PNs |
|-----------|---------------------|-------|-------|-------|--------|-------|--------|------|------|-----|------|--------|-------|--------|------------------|-------------------|---------------|---------------|---------------------|-------------|------------|------------|
| 15674262  | MN-L-Sens-B2-ACp-11 | 0     | 0     | 0     | 0      | 0     | 0      | 0    | 0    | 0   | 0    | 0      | 0     | 0      | 0                | 0                 | 0             | 2             | 25                  | 0           | 0          | 0          |

ID: 15689373  
 name: MN-L-Sens-B2-ACp-12

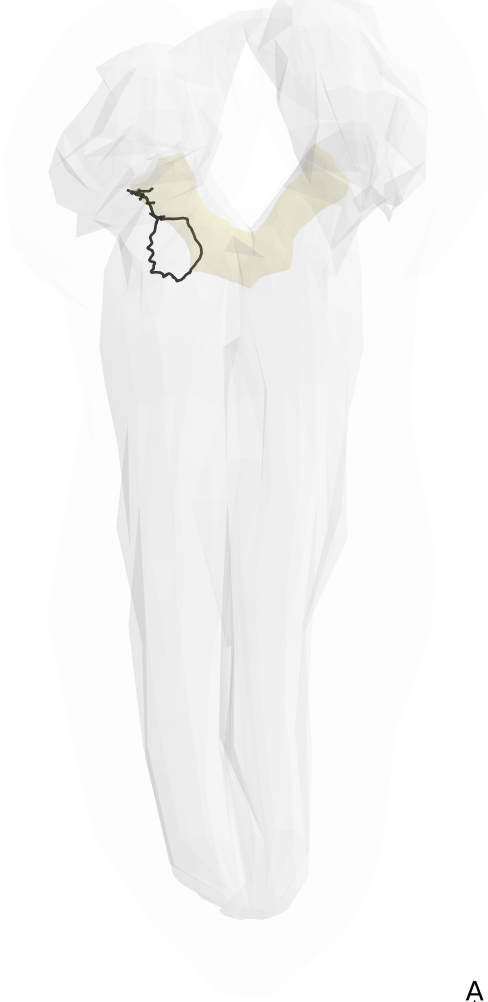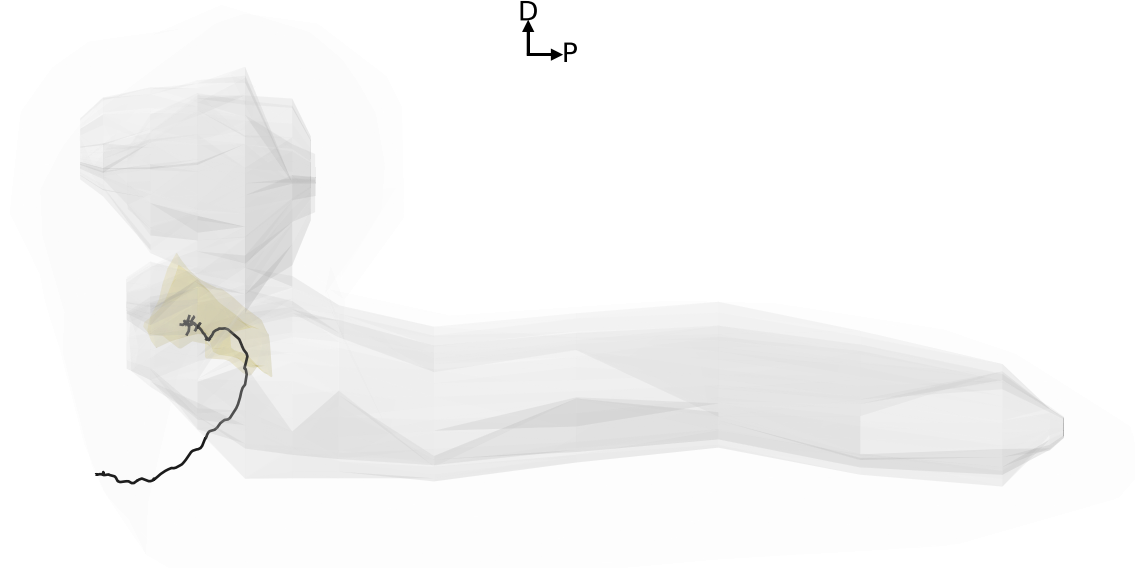

| <i>ID</i> | <i>name</i>         | SCACa | SCAVa | SCAVp | SCACal | SCACp | SCACpl | SCVM | IPCs | DMS | DH44 | Se0ens | Se0ph | PMN LR | MN motor neurons | PaN motor neurons | olfactory PNs | gustatory PNs | multiglomerular PNs | unknown PNs | thermo PNs | visual PNs |
|-----------|---------------------|-------|-------|-------|--------|-------|--------|------|------|-----|------|--------|-------|--------|------------------|-------------------|---------------|---------------|---------------------|-------------|------------|------------|
| 15689373  | MN-L-Sens-B2-ACp-12 | 0     | 0     | 0     | 0      | 0     | 1      | 0    | 0    | 0   | 0    | 0      | 0     | 0      | 0                | 0                 | 0             | 0             | 1                   | 0           | 0          | 0          |

ID: 15716127  
 name: MN-L-Sens-B2-ACp-13

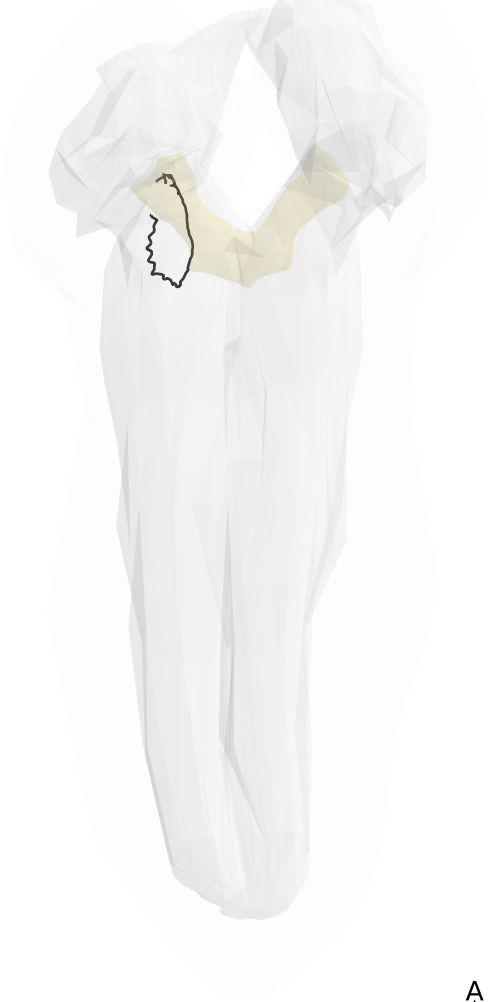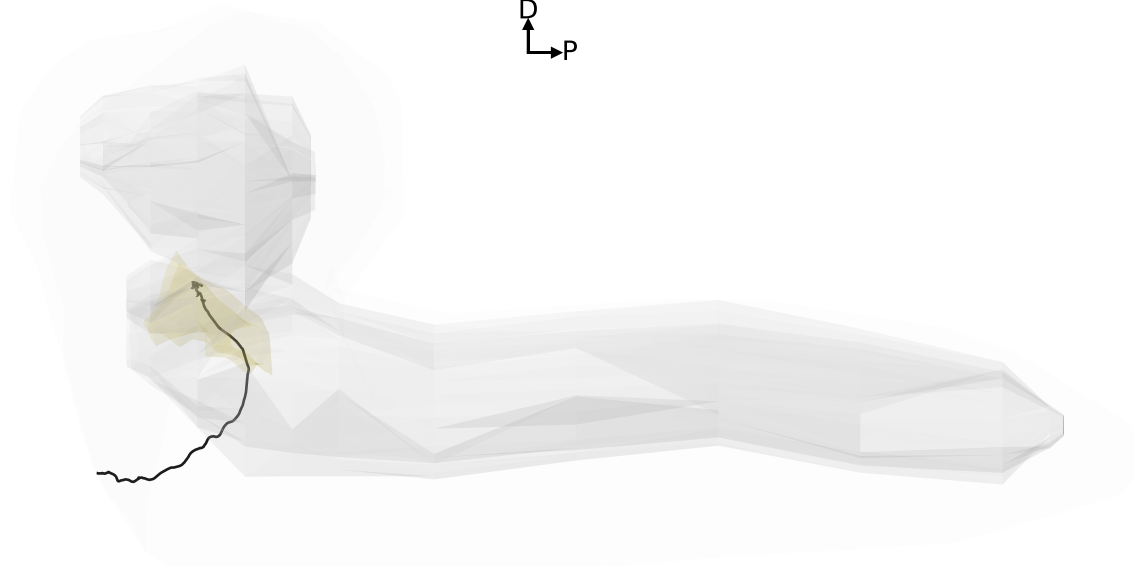

| <i>ID</i> | <i>name</i>         | SCACa | SCAVa | SCAVp | SCACal | SCACp | SCACpl | SCVM | IPCs | DMS | DH44 | Se0ens | Se0ph | PMN LR | MN motor neurons | PaN motor neurons | olfactory PNs | gustatory PNs | multiglomerular PNs | unknown PNs | thermo PNs | visual PNs |
|-----------|---------------------|-------|-------|-------|--------|-------|--------|------|------|-----|------|--------|-------|--------|------------------|-------------------|---------------|---------------|---------------------|-------------|------------|------------|
| 15716127  | MN-L-Sens-B2-ACp-13 | 0     | 0     | 0     | 0      | 0     | 0      | 0    | 0    | 0   | 0    | 0      | 0     | 0      | 0                | 0                 | 0             | 0             | 7                   | 0           | 0          | 0          |

ID: 15686512  
 name: MN-L-Sens-B2-ACp-14

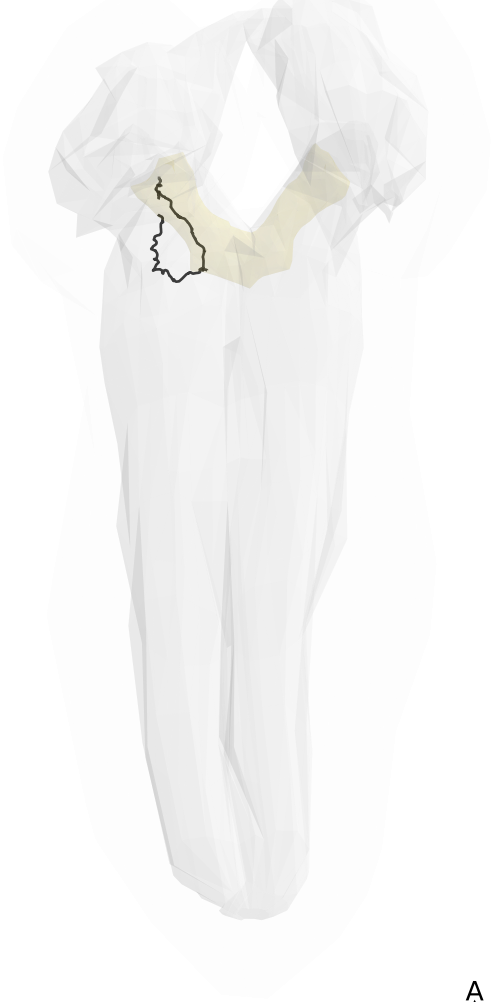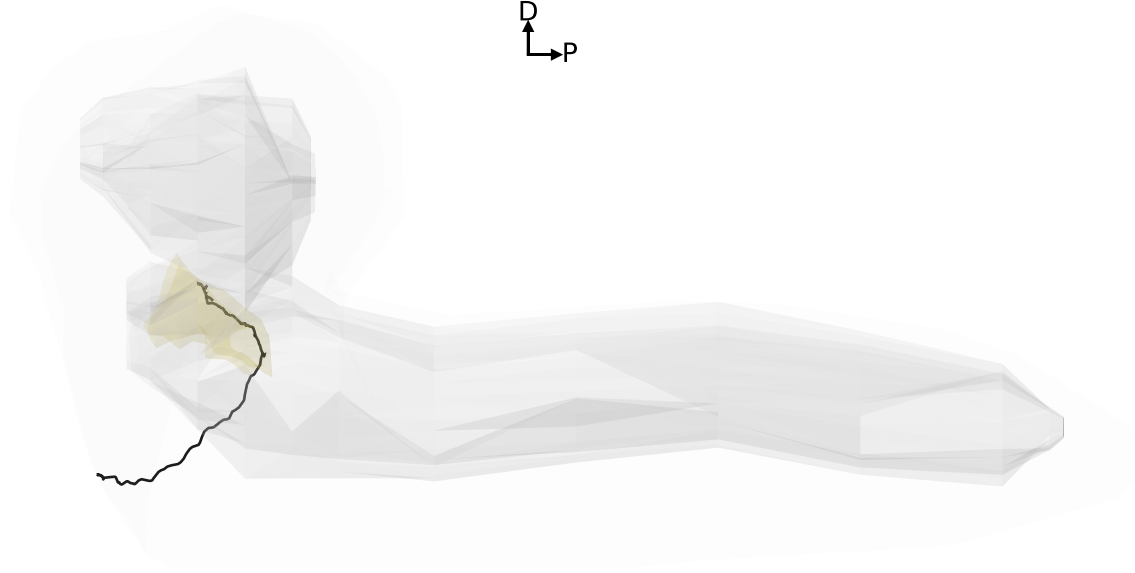

| <i>ID</i> | <i>name</i>         | SCACa | SCAVa | SCAVp | SCACal | SCACp | SCACpl | SCVM | IPCs | DMS | DH44 | Se0ens | Se0ph | PMN LR | MN motor neurons | PaN motor neurons | olfactory PNs | gustatory PNs | multiglomerular PNs | unknown PNs | thermo PNs | visual PNs |
|-----------|---------------------|-------|-------|-------|--------|-------|--------|------|------|-----|------|--------|-------|--------|------------------|-------------------|---------------|---------------|---------------------|-------------|------------|------------|
| 15686512  | MN-L-Sens-B2-ACp-14 | 0     | 0     | 0     | 0      | 2     | 0      | 0    | 0    | 0   | 0    | 0      | 0     | 0      | 0                | 0                 | 0             | 0             | 6                   | 0           | 0          | 0          |



ID: 11736972  
 name: MN-L-Sens-B2-ACp-15

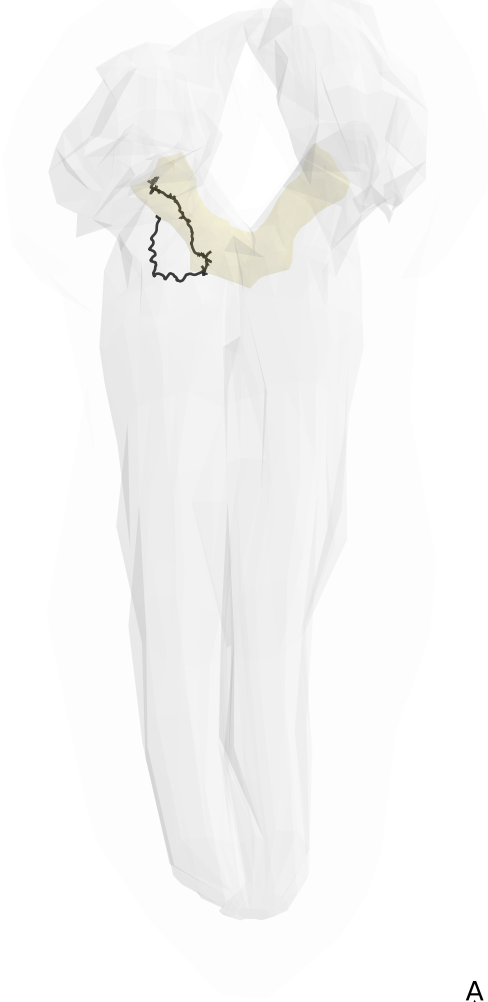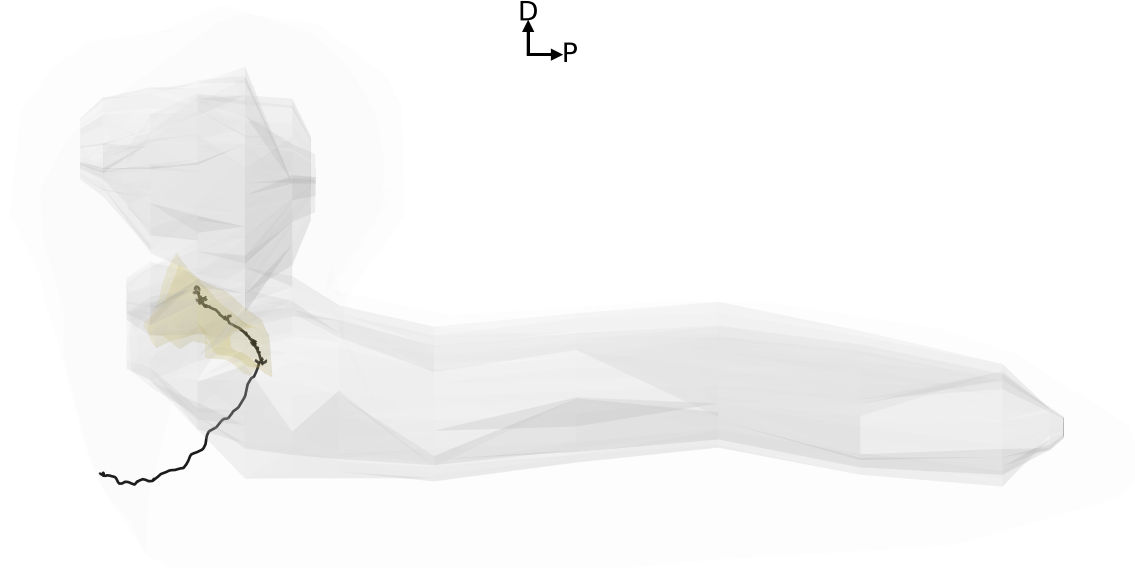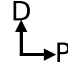

| <i>ID</i> | <i>name</i>         | SCACa | SCAVa | SCAVp | SCACal | SCACp | SCACpl | SCVM | IPCs | DMS | DH44 | Se0ens | Se0ph | PMN LR | MN motor neurons | PaN motor neurons | olfactory PNs | gustatory PNs | multiglomerular PNs | unknown PNs | thermo PNs | visual PNs |
|-----------|---------------------|-------|-------|-------|--------|-------|--------|------|------|-----|------|--------|-------|--------|------------------|-------------------|---------------|---------------|---------------------|-------------|------------|------------|
| 11736972  | MN-L-Sens-B2-ACp-15 | 0     | 0     | 0     | 0      | 0     | 0      | 0    | 0    | 0   | 0    | 0      | 0     | 0      | 0                | 0                 | 1             | 0             | 2                   | 0           | 0          | 0          |

ID: 12073881  
 name: MN-L-Sens-B2-ACp-16

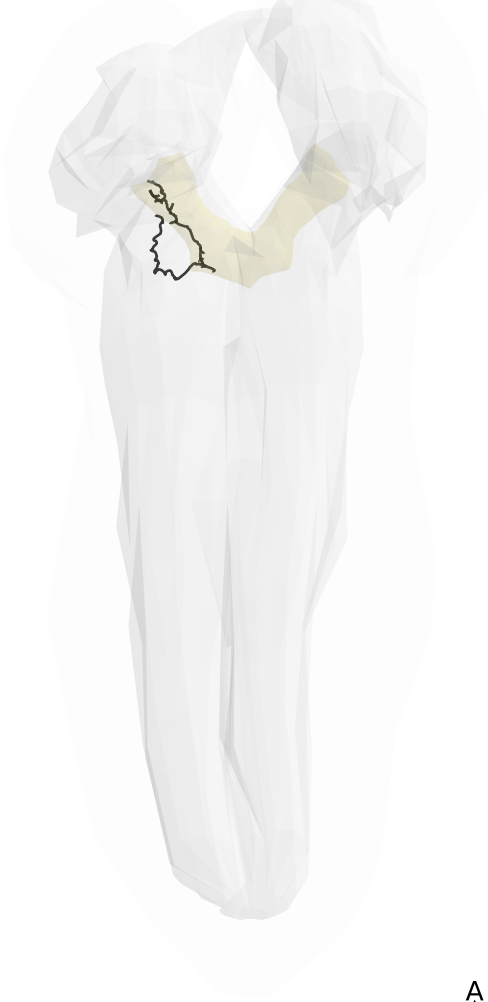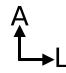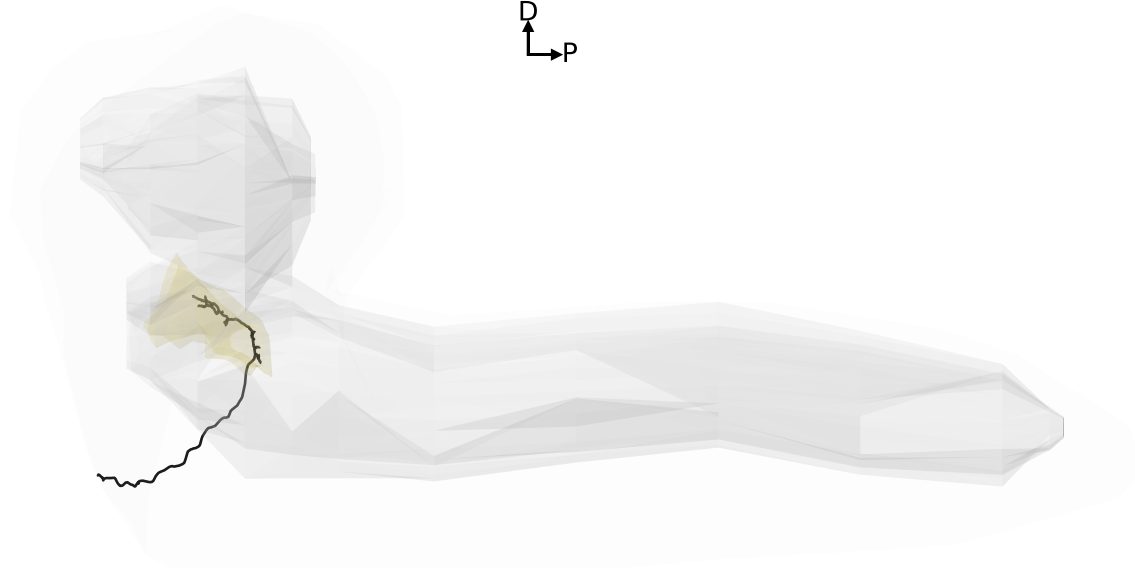

| <i>ID</i> | <i>name</i>         | SCACa | SCAVa | SCAVp | SCACal | SCACp | SCACpl | SCVM | IPCs | DMS | DH44 | Se0ens | Se0ph | PMN LR | MN motor neurons | PaN motor neurons | olfactory PNs | gustatory PNs | multiglomerular PNs | unknown PNs | thermo PNs | visual PNs |
|-----------|---------------------|-------|-------|-------|--------|-------|--------|------|------|-----|------|--------|-------|--------|------------------|-------------------|---------------|---------------|---------------------|-------------|------------|------------|
| 12073881  | MN-L-Sens-B2-ACp-16 | 0     | 0     | 0     | 0      | 3     | 0      | 0    | 0    | 0   | 0    | 0      | 0     | 0      | 0                | 0                 | 4             | 0             | 5                   | 0           | 0          | 0          |

ID: 18934019  
 name: MN-L-Sens-B2-ACp-17

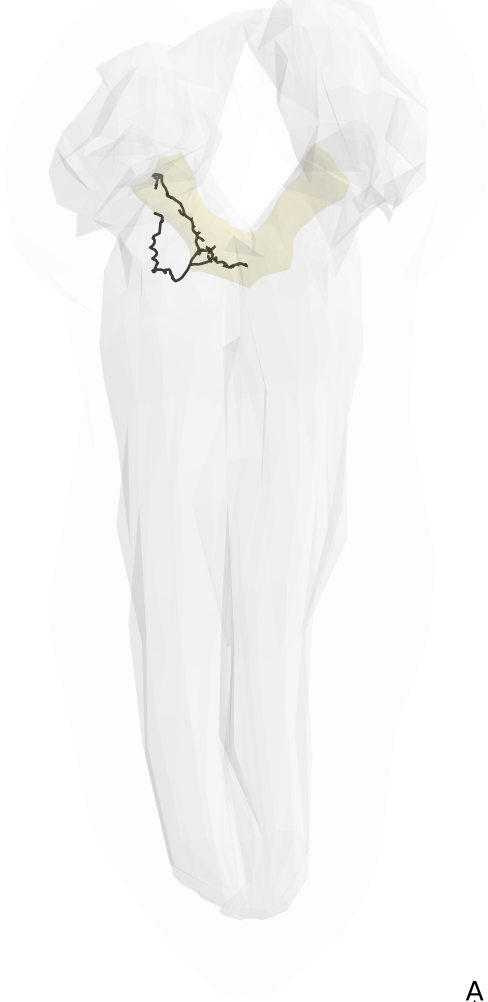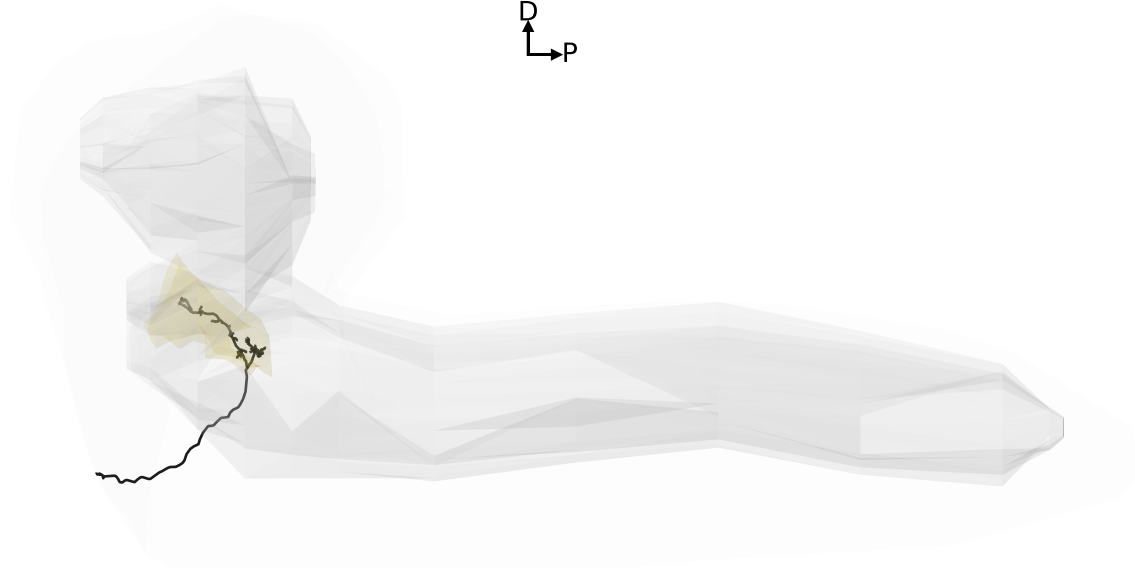

| <i>ID</i> | <i>name</i>         | SCACa | SCAVa | SCAVp | SCACal | SCACp | SCACpl | SCVM | IPCs | DMS | DH44 | Se0ens | Se0ph | PMN LR | MN motor neurons | PaN motor neurons | olfactory PNs | gustatory PNs | multiglomerular PNs | unknown PNs | thermo PNs | visual PNs |
|-----------|---------------------|-------|-------|-------|--------|-------|--------|------|------|-----|------|--------|-------|--------|------------------|-------------------|---------------|---------------|---------------------|-------------|------------|------------|
| 18934019  | MN-L-Sens-B2-ACp-17 | 0     | 0     | 0     | 0      | 2     | 0      | 0    | 0    | 0   | 0    | 0      | 0     | 0      | 0                | 0                 | 1             | 5             | 0                   | 1           | 0          | 0          |

ID: 15677323  
 name: MN-L-Sens-B2-ACp-18

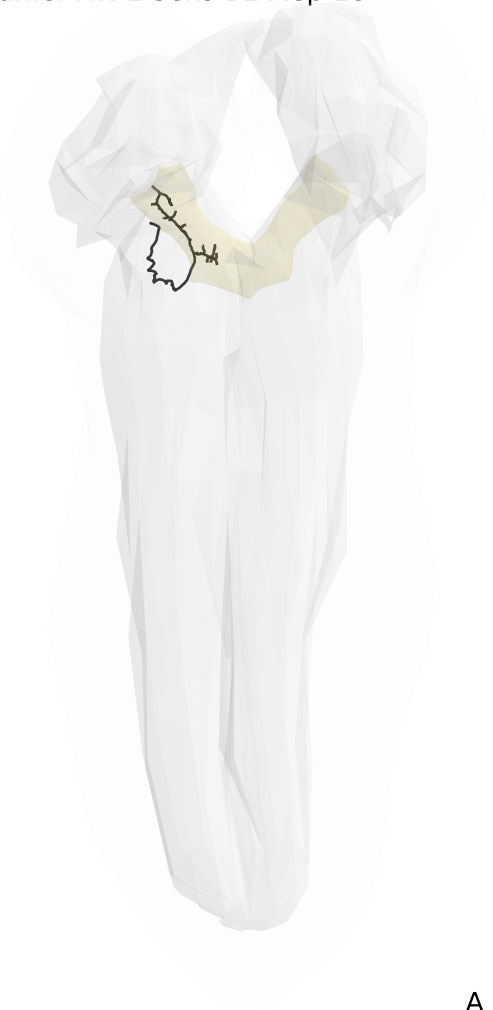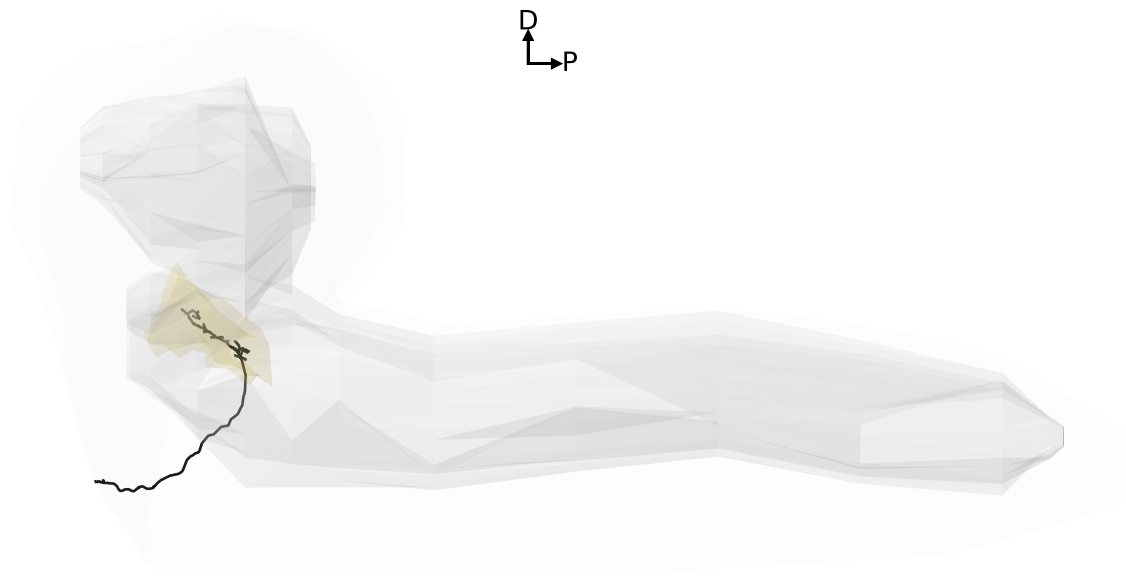

| <i>ID</i> | <i>name</i>         | SCACa | SCAVa | SCAVp | SCACal | SCACp | SCACpl | SCVM | IPCs | DMS | DH44 | Se0ens | Se0ph | PMN LR | MN motor neurons | PaN motor neurons | olfactory PNs | gustatory PNs | multiglomerular PNs | unknown PNs | thermo PNs | visual PNs |
|-----------|---------------------|-------|-------|-------|--------|-------|--------|------|------|-----|------|--------|-------|--------|------------------|-------------------|---------------|---------------|---------------------|-------------|------------|------------|
| 15677323  | MN-L-Sens-B2-ACp-18 | 0     | 0     | 0     | 0      | 1     | 0      | 0    | 0    | 0   | 0    | 0      | 0     | 0      | 0                | 0                 | 0             | 0             | 0                   | 1           | 0          | 0          |



ID: 15688358  
 name: MN-L-Sens-B2-ACp-20

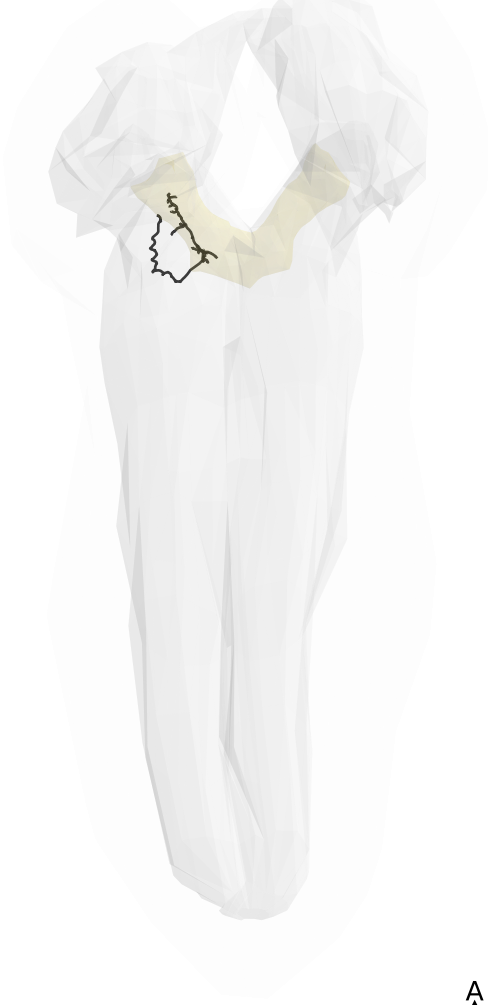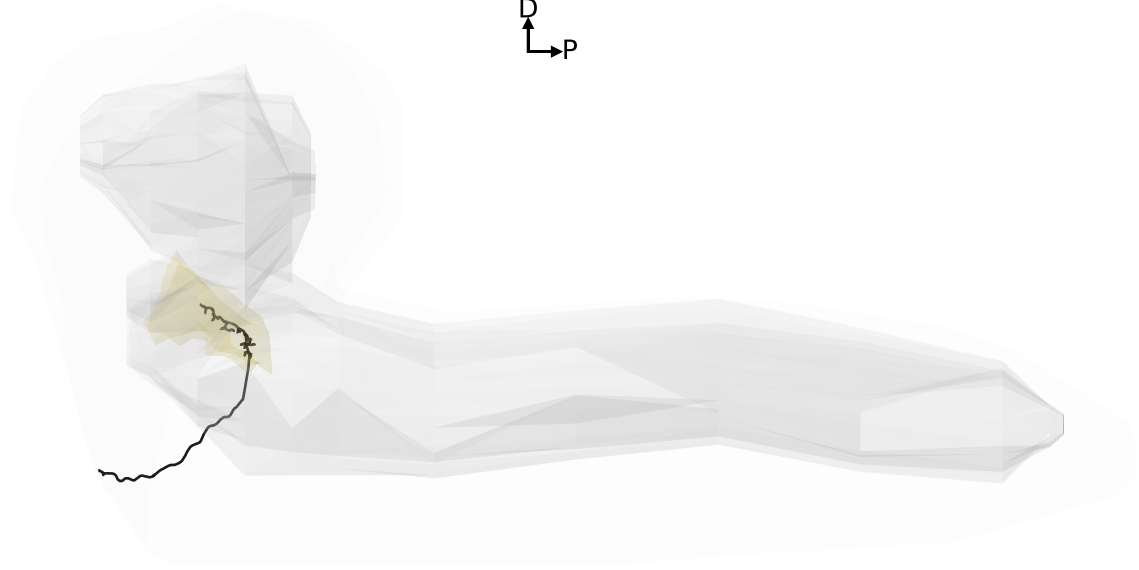

| <i>ID</i> | <i>name</i>         | SCACa | SCAVa | SCAVp | SCACal | SCACp | SCACpl | SCVM | IPCs | DMS | DH44 | Se0ens | Se0ph | PMN LR | MN motor neurons | PaN motor neurons | olfactory PNs | gustatory PNs | multiglomerular PNs | unknown PNs | thermo PNs | visual PNs |
|-----------|---------------------|-------|-------|-------|--------|-------|--------|------|------|-----|------|--------|-------|--------|------------------|-------------------|---------------|---------------|---------------------|-------------|------------|------------|
| 15688358  | MN-L-Sens-B2-ACp-20 | 0     | 0     | 0     | 0      | 3     | 0      | 0    | 0    | 0   | 0    | 0      | 0     | 0      | 0                | 0                 | 2             | 0             | 1                   | 0           | 0          | 0          |

ID: 15681740  
 name: MN-L-Sens-B2-ACp-21

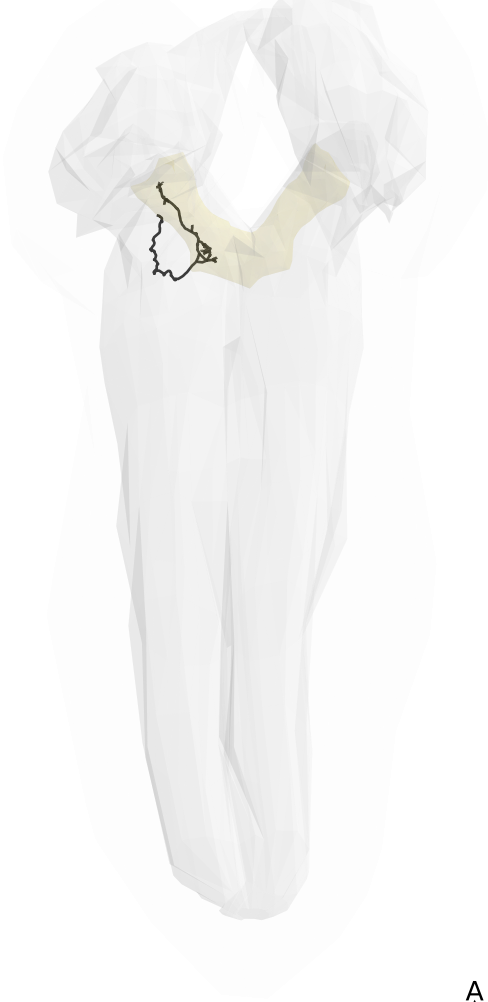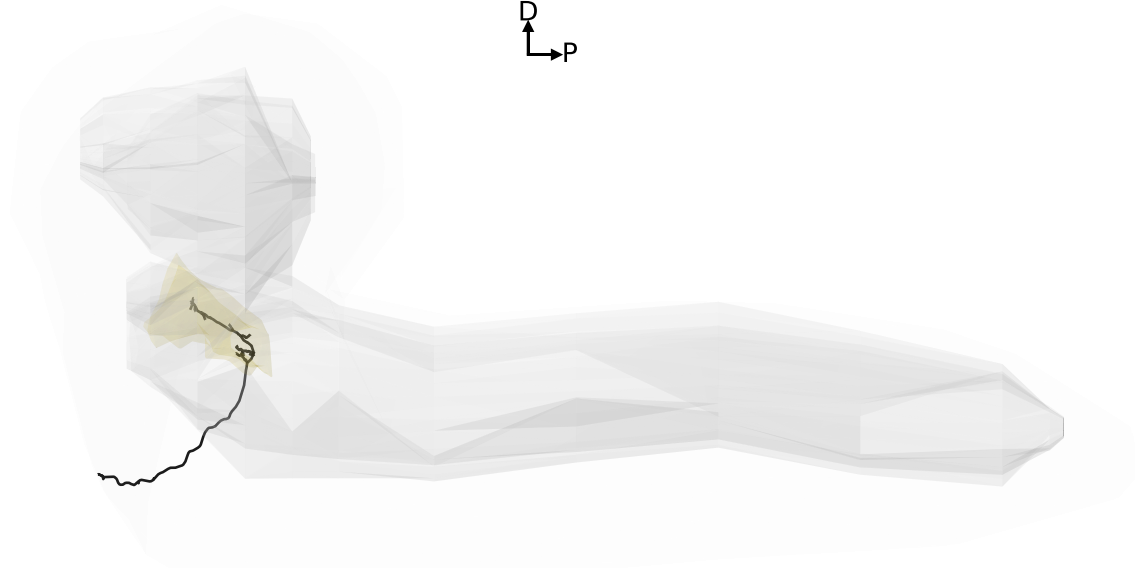

| <i>ID</i> | <i>name</i>         | SCACa | SCAVa | SCAVp | SCACal | SCACp | SCACpl | SCVM | IPCs | DMS | DH44 | Se0ens | Se0ph | PMN LR | MN motor neurons | PaN motor neurons | olfactory PNs | gustatory PNs | multiglomerular PNs | unknown PNs | thermo PNs | visual PNs |
|-----------|---------------------|-------|-------|-------|--------|-------|--------|------|------|-----|------|--------|-------|--------|------------------|-------------------|---------------|---------------|---------------------|-------------|------------|------------|
| 15681740  | MN-L-Sens-B2-ACp-21 | 0     | 0     | 0     | 0      | 2     | 0      | 0    | 0    | 0   | 0    | 0      | 0     | 0      | 0                | 0                 | 2             | 0             | 0                   | 0           | 0          | 0          |





ID: 15723727  
 name: MN-L-Sens-B3-ACp-01

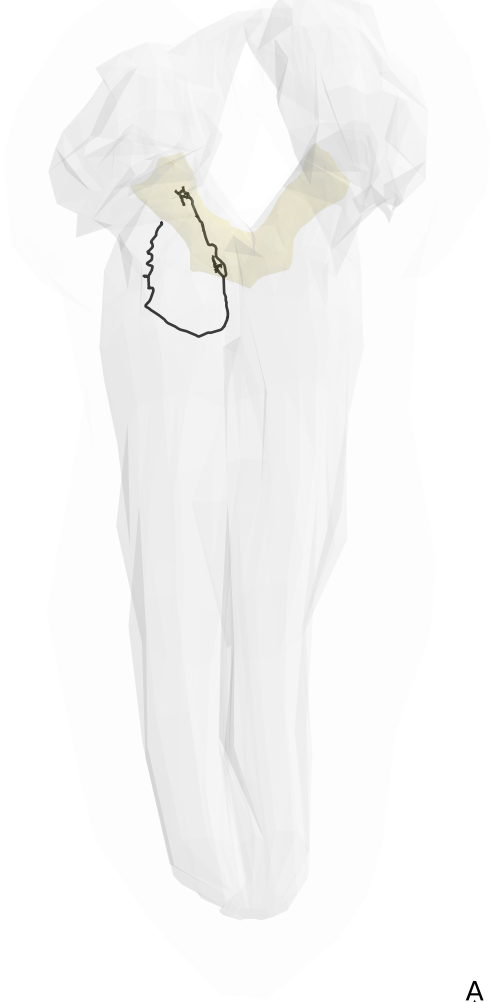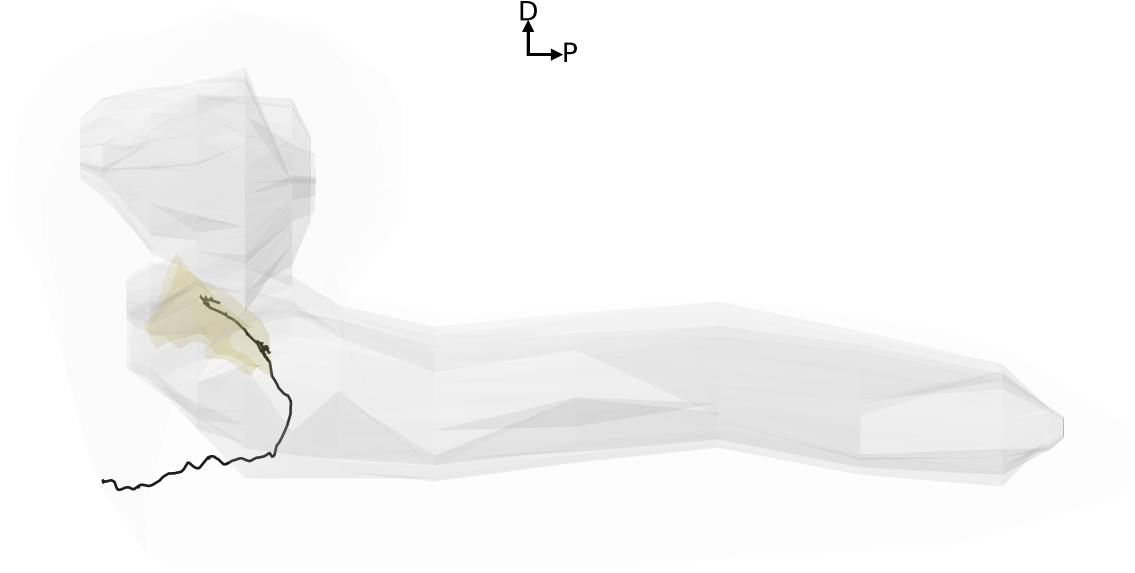

| <i>ID</i> | <i>name</i>         | SCACa | SCAVa | SCAVp | SCACal | SCACp | SCACpl | SCVM | IPCs | DMS | DH44 | Se0ens | Se0ph | PMN LR | MN motor neurons | PaN motor neurons | olfactory PNs | gustatory PNs | multiglomerular PNs | unknown PNs | thermo PNs | visual PNs |
|-----------|---------------------|-------|-------|-------|--------|-------|--------|------|------|-----|------|--------|-------|--------|------------------|-------------------|---------------|---------------|---------------------|-------------|------------|------------|
| 15723727  | MN-L-Sens-B3-ACp-01 | 0     | 0     | 0     | 0      | 15    | 0      | 0    | 0    | 0   | 0    | 0      | 0     | 0      | 0                | 0                 | 2             | 0             | 0                   | 0           | 0          | 0          |

ID: 16288872  
 name: MN-L-Sens-B3-ACp-02

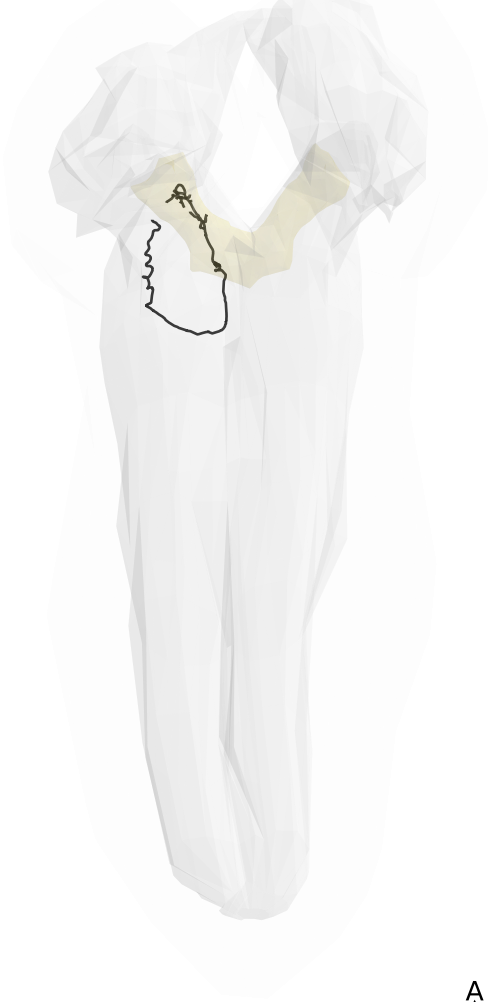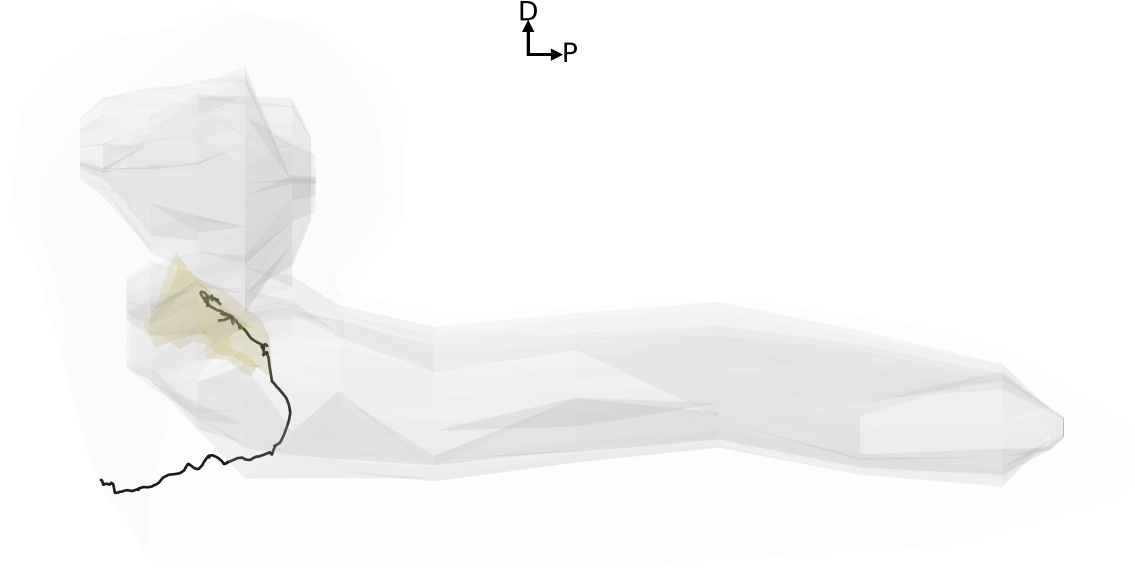

| <i>ID</i> | <i>name</i>         | SCACa | SCAVa | SCAVp | SCACal | SCACp | SCACpl | SCVM | IPCs | DMS | DH44 | Se0ens | Se0ph | PMN LR | MN motor neurons | PaN motor neurons | olfactory PNs | gustatory PNs | multiglomerular PNs | unknown PNs | thermo PNs | visual PNs |
|-----------|---------------------|-------|-------|-------|--------|-------|--------|------|------|-----|------|--------|-------|--------|------------------|-------------------|---------------|---------------|---------------------|-------------|------------|------------|
| 16288872  | MN-L-Sens-B3-ACp-02 | 0     | 0     | 0     | 0      | 18    | 0      | 0    | 0    | 0   | 0    | 0      | 0     | 0      | 0                | 0                 | 1             | 0             | 0                   | 0           | 0          | 0          |





ID: 3054101  
 name: MN-L-Sens-B3-ACp-04

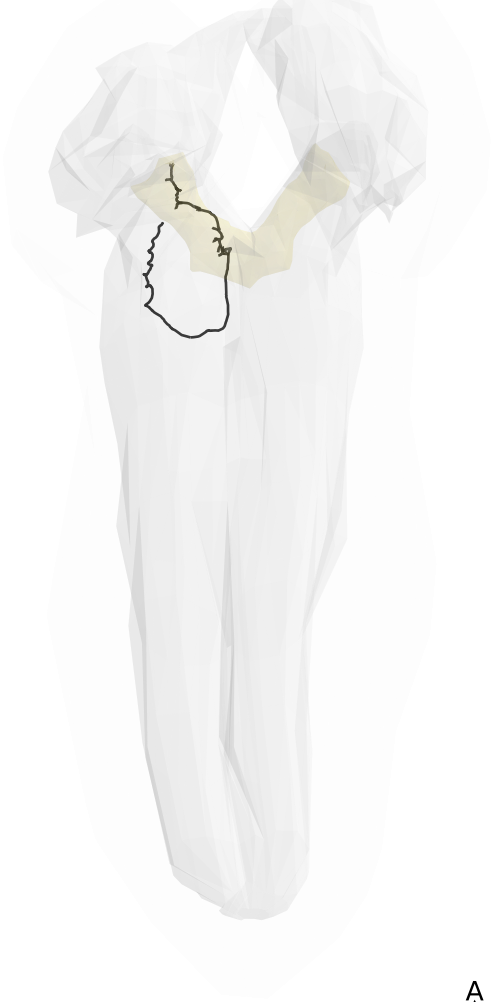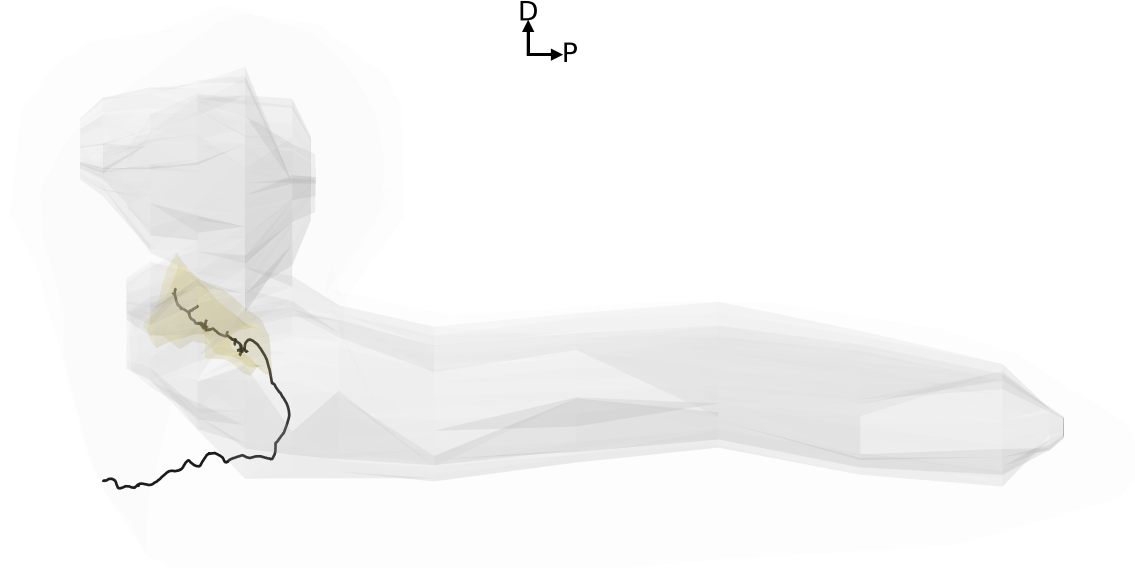

| <i>ID</i> | <i>name</i>         | SCACa | SCAVa | SCAVp | SCACal | SCACp | SCACpl | SCVM | IPCs | DMS | DH44 | Se0ens | Se0ph | PMN LR | MN motor neurons | PaN motor neurons | olfactory PNs | gustatory PNs | multiglomerular PNs | unknown PNs | thermo PNs | visual PNs |
|-----------|---------------------|-------|-------|-------|--------|-------|--------|------|------|-----|------|--------|-------|--------|------------------|-------------------|---------------|---------------|---------------------|-------------|------------|------------|
| 3054101   | MN-L-Sens-B3-ACp-04 | 0     | 0     | 0     | 0      | 5     | 0      | 0    | 0    | 0   | 1    | 0      | 0     | 0      | 0                | 0                 | 0             | 0             | 7                   | 0           | 0          | 0          |







ID: 15652529  
 name: MN-R-Sens-B2-ACp-01

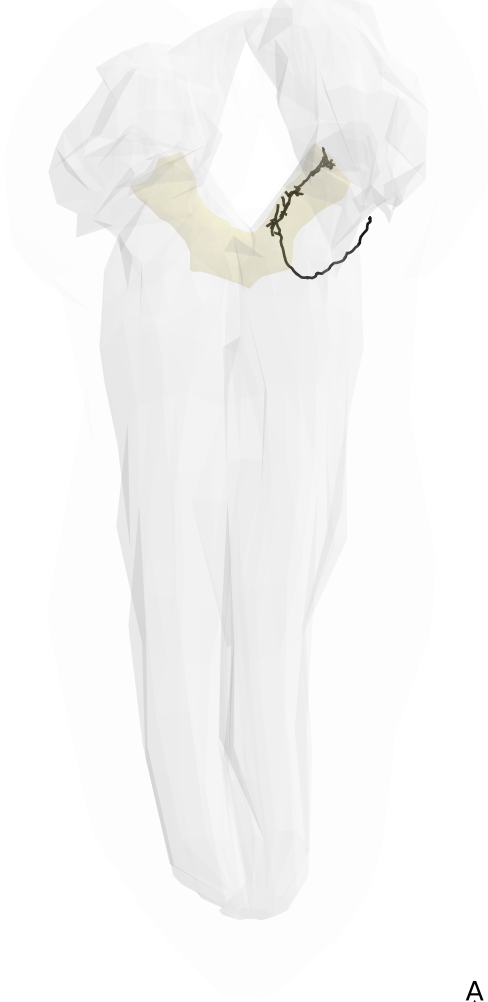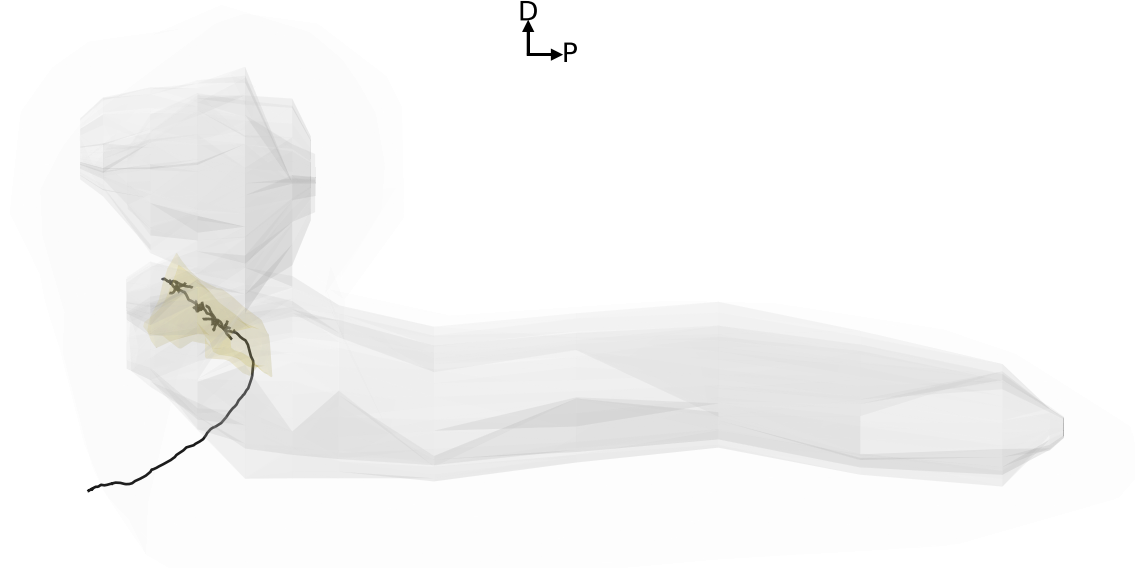

| <i>ID</i> | <i>name</i>         | SCACa | SCAVa | SCAVp | SCACal | SCACp | SCACpl | SCVM | IPCs | DMS | DH44 | Se0ens | Se0ph | PMN LR | MN motor neurons | PaN motor neurons | olfactory PNs | gustatory PNs | multiglomerular PNs | unknown PNs | thermo PNs | visual PNs |
|-----------|---------------------|-------|-------|-------|--------|-------|--------|------|------|-----|------|--------|-------|--------|------------------|-------------------|---------------|---------------|---------------------|-------------|------------|------------|
| 15652529  | MN-R-Sens-B2-ACp-01 | 0     | 0     | 0     | 0      | 2     | 0      | 0    | 0    | 0   | 0    | 0      | 0     | 0      | 0                | 0                 | 1             | 40            | 1                   | 0           | 0          | 0          |

ID: 15556868  
 name: MN-R-Sens-B2-ACp-02

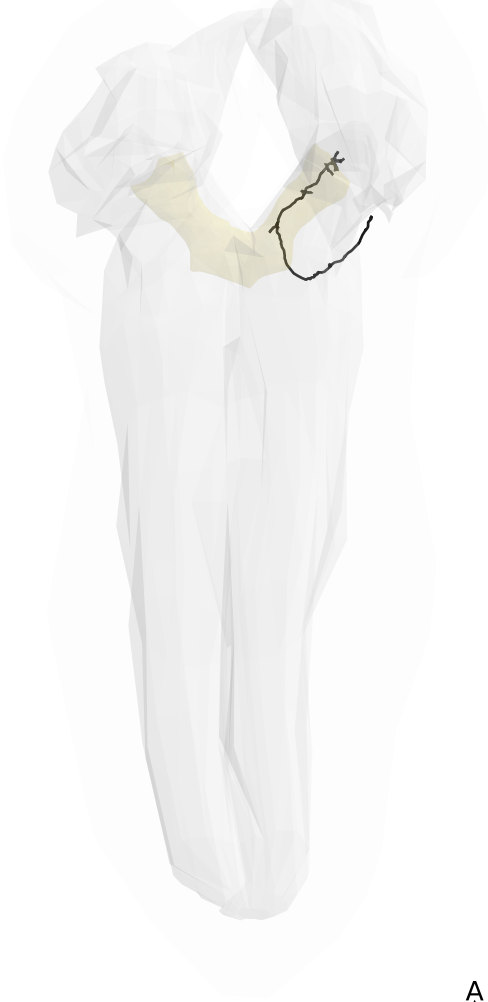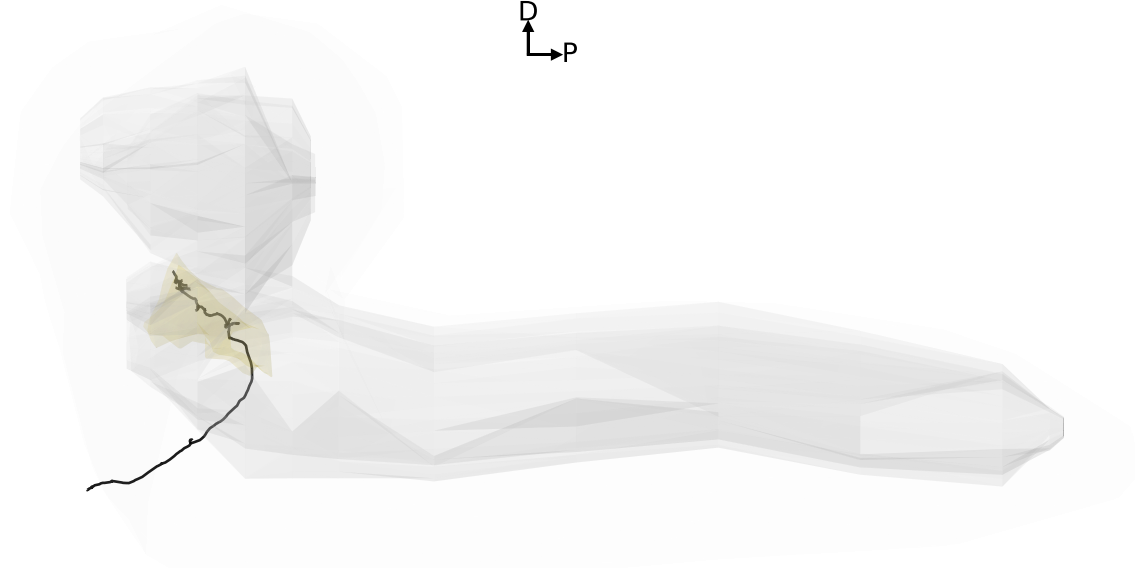

| <i>ID</i> | <i>name</i>         | SCACa | SCAVa | SCAVp | SCACal | SCACp | SCACpl | SCVM | IPCs | DMS | DH44 | Se0ens | Se0ph | PMN LR | MN motor neurons | PaN motor neurons | olfactory PNs | gustatory PNs | multiglomerular PNs | unknown PNs | thermo PNs | visual PNs |
|-----------|---------------------|-------|-------|-------|--------|-------|--------|------|------|-----|------|--------|-------|--------|------------------|-------------------|---------------|---------------|---------------------|-------------|------------|------------|
| 15556868  | MN-R-Sens-B2-ACp-02 | 0     | 0     | 0     | 0      | 4     | 0      | 0    | 0    | 0   | 0    | 0      | 0     | 0      | 0                | 0                 | 3             | 1             | 5                   | 0           | 0          | 0          |



ID: 15736147  
 name: MN-R-Sens-B2-ACp-03

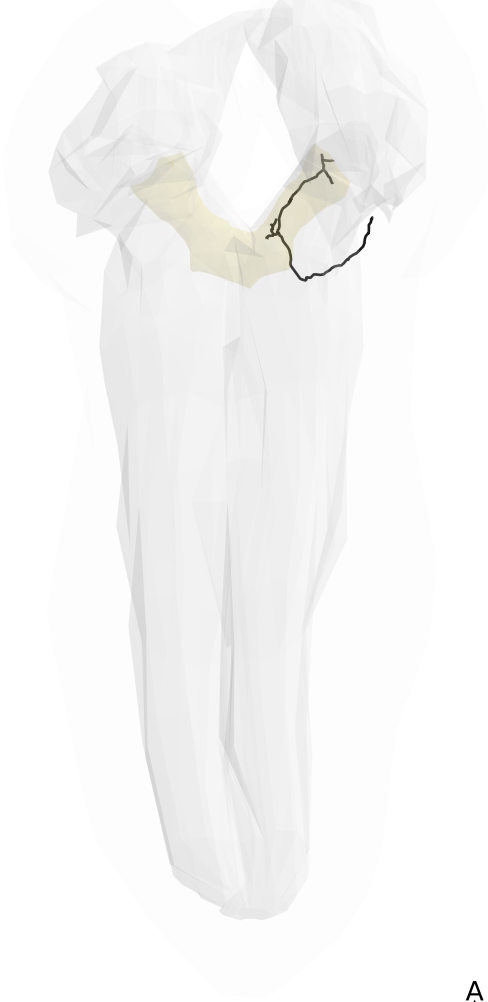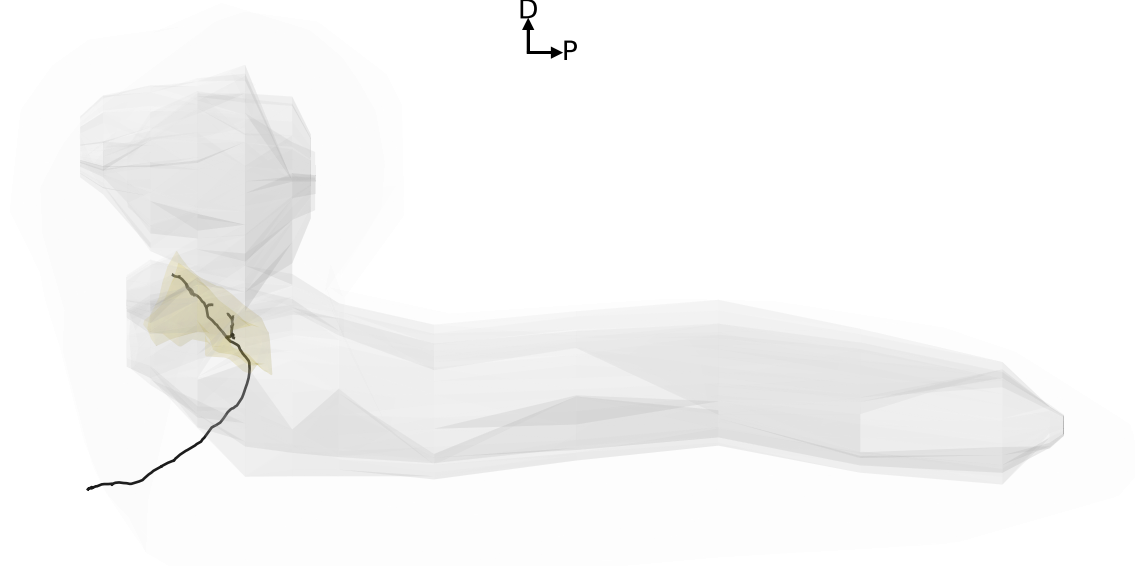

| <i>ID</i> | <i>name</i>         | SCACa | SCAVa | SCAVp | SCACal | SCACp | SCACpl | SCVM | IPCs | DMS | DH44 | Se0ens | Se0ph | PMN LR | MN motor neurons | PaN motor neurons | olfactory PNs | gustatory PNs | multiglomerular PNs | unknown PNs | thermo PNs | visual PNs |
|-----------|---------------------|-------|-------|-------|--------|-------|--------|------|------|-----|------|--------|-------|--------|------------------|-------------------|---------------|---------------|---------------------|-------------|------------|------------|
| 15736147  | MN-R-Sens-B2-ACp-03 | 0     | 0     | 0     | 0      | 4     | 0      | 0    | 0    | 0   | 0    | 0      | 0     | 0      | 0                | 0                 | 0             | 8             | 1                   | 0           | 0          | 0          |

ID: 16341399  
 name: MN-R-Sens-B2-ACp-04

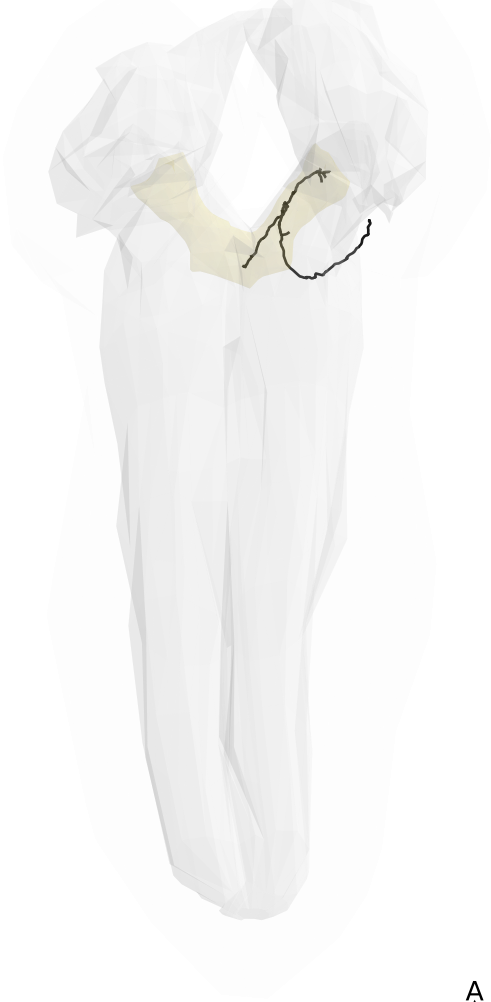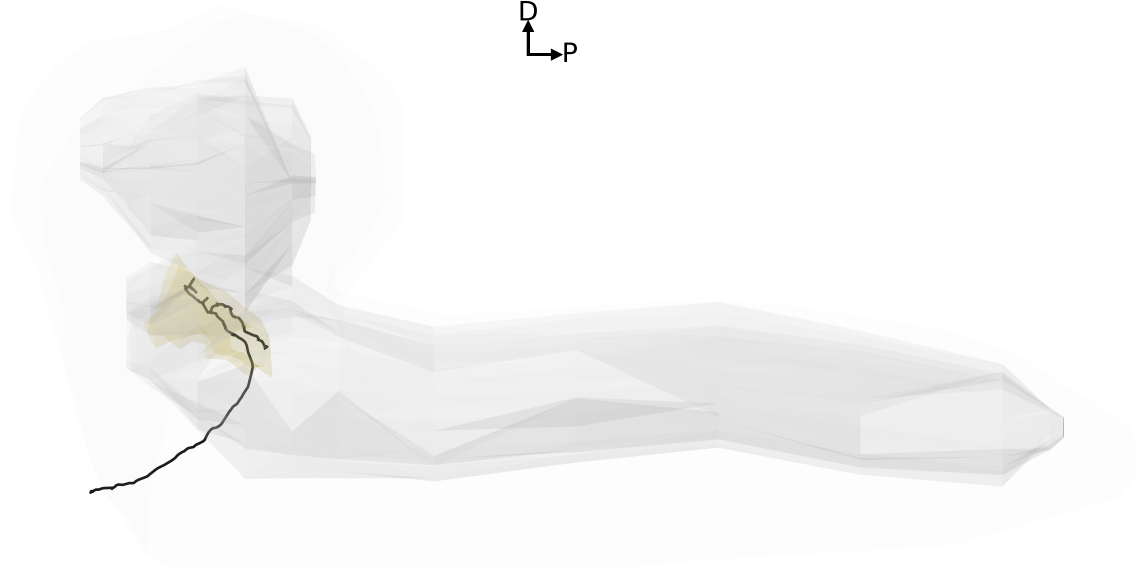

| <i>ID</i> | <i>name</i>         | SCACa | SCAVa | SCAVp | SCACal | SCACp | SCACpl | SCVM | IPCs | DMS | DH44 | Se0ens | Se0ph | PMN LR | MN motor neurons | PaN motor neurons | olfactory PNs | gustatory PNs | multiglomerular PNs | unknown PNs | thermo PNs | visual PNs |
|-----------|---------------------|-------|-------|-------|--------|-------|--------|------|------|-----|------|--------|-------|--------|------------------|-------------------|---------------|---------------|---------------------|-------------|------------|------------|
| 16341399  | MN-R-Sens-B2-ACp-04 | 0     | 0     | 0     | 0      | 7     | 0      | 0    | 0    | 0   | 0    | 0      | 0     | 0      | 0                | 0                 | 0             | 16            | 4                   | 0           | 1          | 0          |

ID: 15615589  
 name: MN-R-Sens-B2-ACp-05

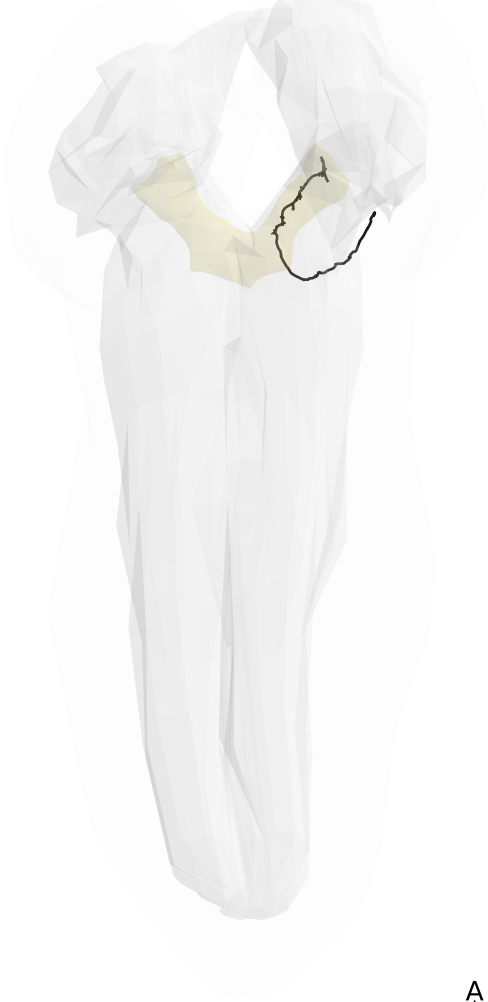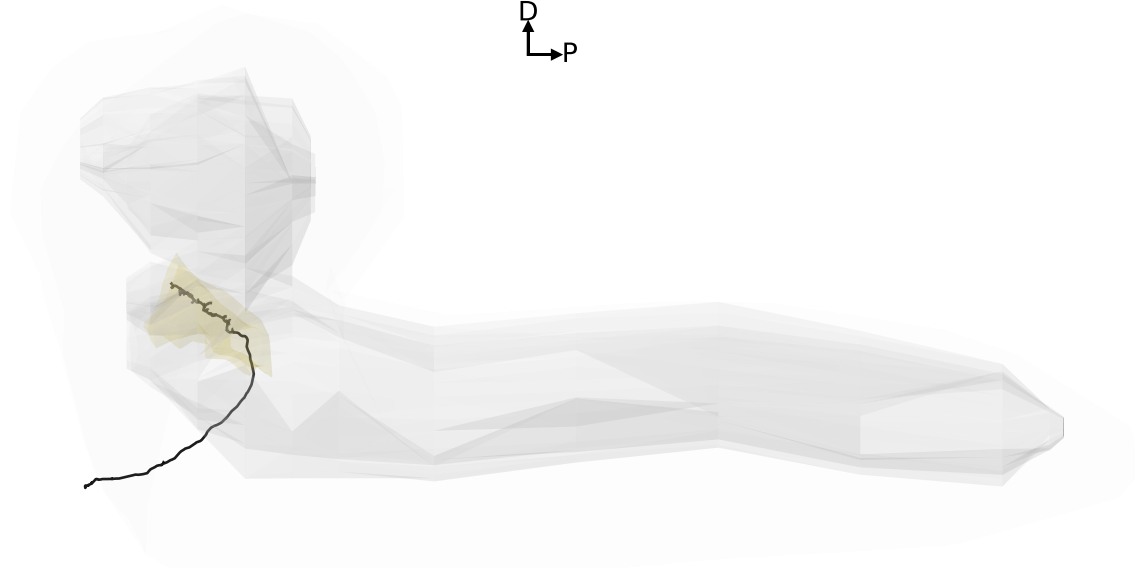

| <i>ID</i> | <i>name</i>         | SCACa | SCAVa | SCAVp | SCACal | SCACp | SCACpl | SCVM | IPCs | DMS | DH44 | Se0ens | Se0ph | PMN LR | MN motor neurons | PaN motor neurons | olfactory PNs | gustatory PNs | multiglomerular PNs | unknown PNs | thermo PNs | visual PNs |
|-----------|---------------------|-------|-------|-------|--------|-------|--------|------|------|-----|------|--------|-------|--------|------------------|-------------------|---------------|---------------|---------------------|-------------|------------|------------|
| 15615589  | MN-R-Sens-B2-ACp-05 | 0     | 0     | 0     | 0      | 8     | 0      | 0    | 0    | 0   | 0    | 0      | 0     | 0      | 0                | 0                 | 0             | 12            | 4                   | 0           | 0          | 0          |

ID: 15589362  
 name: MN-R-Sens-B2-ACp-06

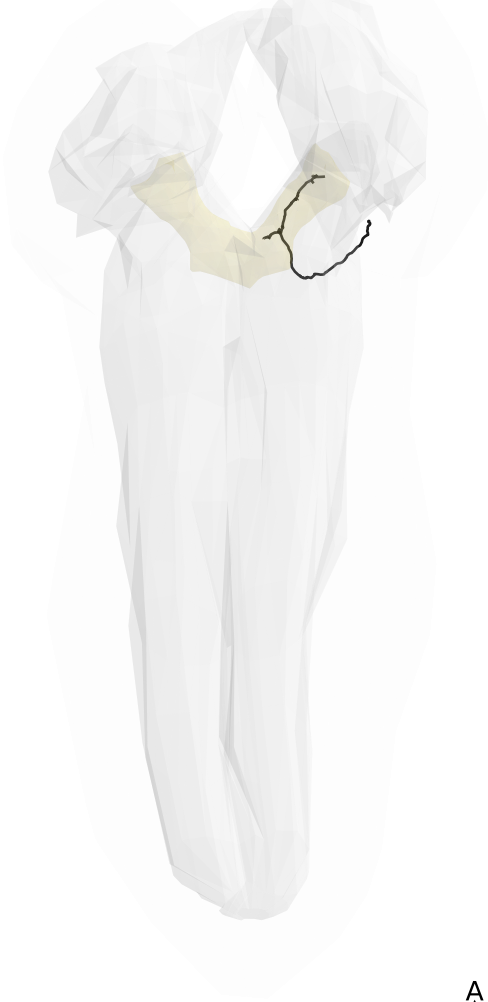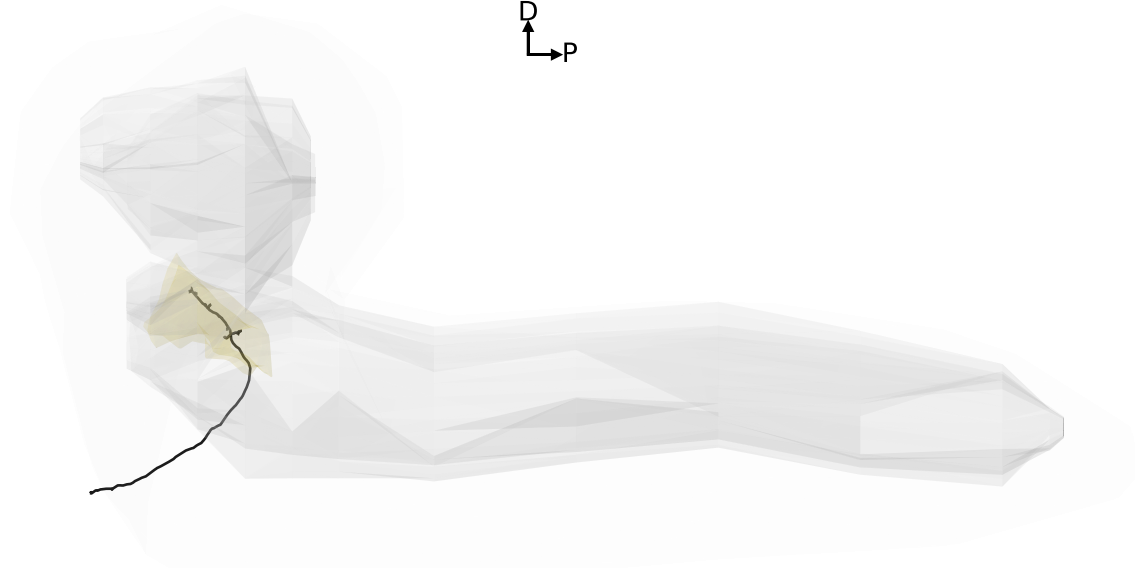

| <i>ID</i> | <i>name</i>         | SCACa | SCAVa | SCAVp | SCACal | SCACp | SCACpl | SCVM | IPCs | DMS | DH44 | Se0ens | Se0ph | PMN LR | MN motor neurons | PaN motor neurons | olfactory PNs | gustatory PNs | multiglomerular PNs | unknown PNs | thermo PNs | visual PNs |
|-----------|---------------------|-------|-------|-------|--------|-------|--------|------|------|-----|------|--------|-------|--------|------------------|-------------------|---------------|---------------|---------------------|-------------|------------|------------|
| 15589362  | MN-R-Sens-B2-ACp-06 | 0     | 0     | 0     | 0      | 4     | 0      | 0    | 0    | 0   | 0    | 0      | 0     | 0      | 0                | 0                 | 0             | 4             | 0                   | 0           | 0          | 0          |

ID: 15653432  
 name: MN-R-Sens-B2-ACp-07

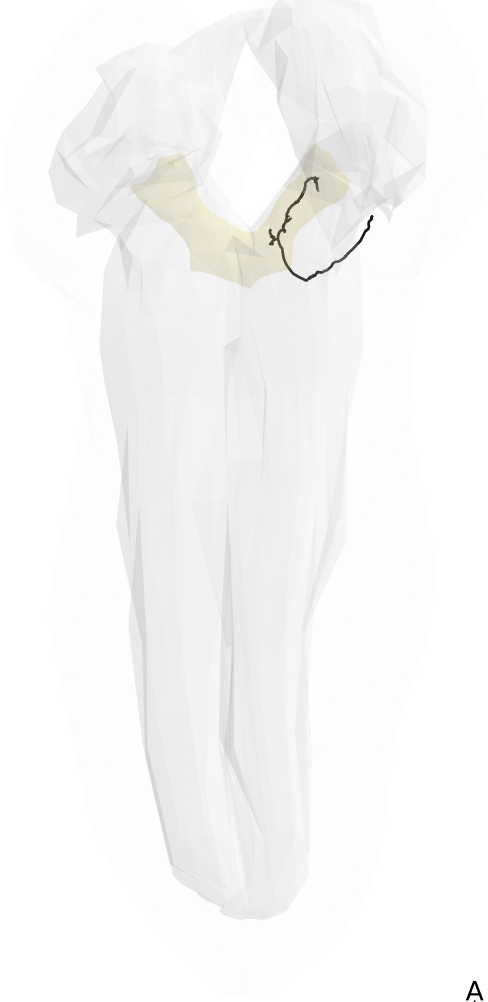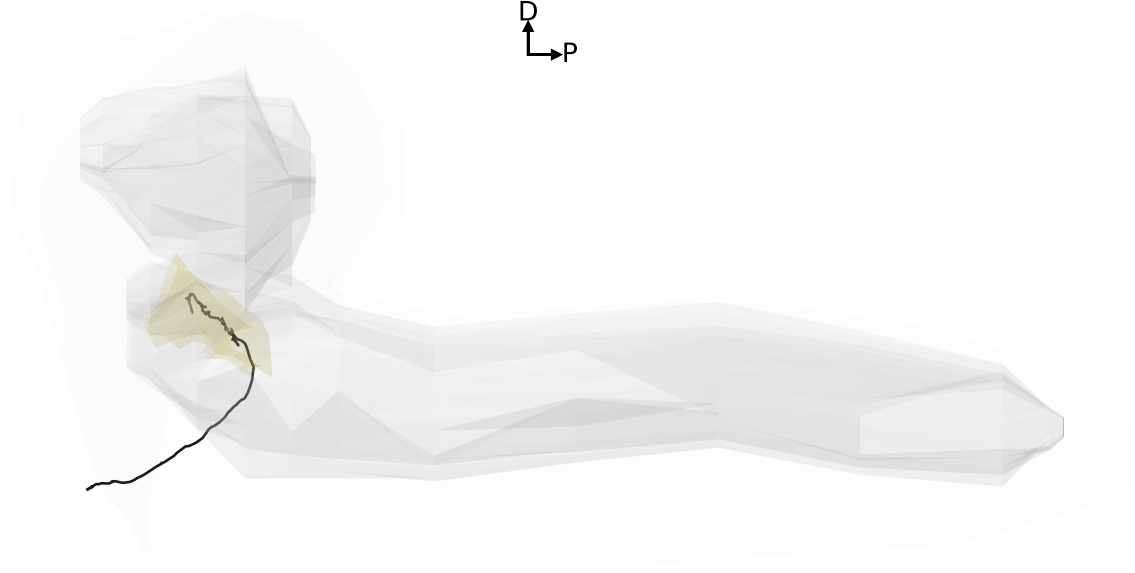

| <i>ID</i> | <i>name</i>         | SCACa | SCAVa | SCAVp | SCACal | SCACp | SCACpl | SCVM | IPCs | DMS | DH44 | Se0ens | Se0ph | PMN LR | MN motor neurons | PaN motor neurons | olfactory PNs | gustatory PNs | multiglomerular PNs | unknown PNs | thermo PNs | visual PNs |
|-----------|---------------------|-------|-------|-------|--------|-------|--------|------|------|-----|------|--------|-------|--------|------------------|-------------------|---------------|---------------|---------------------|-------------|------------|------------|
| 15653432  | MN-R-Sens-B2-ACp-07 | 0     | 0     | 0     | 0      | 4     | 0      | 0    | 0    | 0   | 0    | 0      | 0     | 0      | 0                | 0                 | 0             | 14            | 0                   | 0           | 0          | 0          |



ID: 15615042  
 name: MN-R-Sens-B2-ACp-09

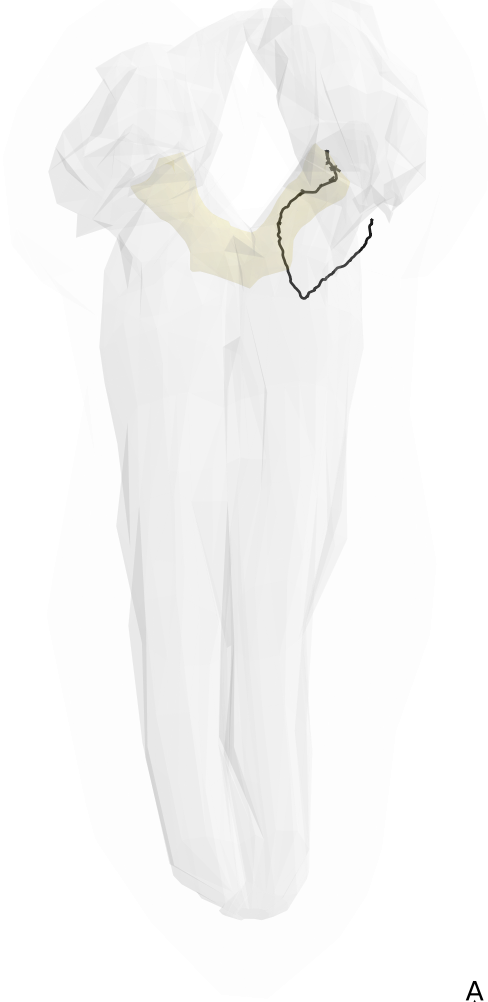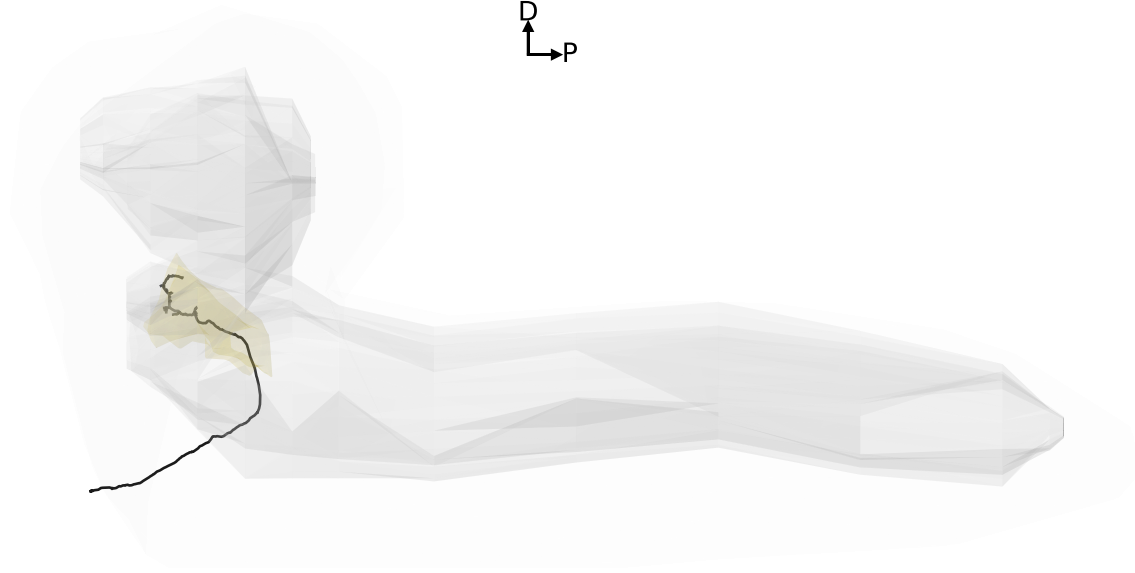

| <i>ID</i> | <i>name</i>         | SCACa | SCAVa | SCAVp | SCACal | SCACp | SCACpl | SCVM | IPCs | DMS | DH44 | Se0ens | Se0ph | PMN LR | MN motor neurons | PaN motor neurons | olfactory PNs | gustatory PNs | multiglomerular PNs | unknown PNs | thermo PNs | visual PNs |
|-----------|---------------------|-------|-------|-------|--------|-------|--------|------|------|-----|------|--------|-------|--------|------------------|-------------------|---------------|---------------|---------------------|-------------|------------|------------|
| 15615042  | MN-R-Sens-B2-ACp-09 | 0     | 0     | 0     | 0      | 6     | 0      | 0    | 0    | 0   | 0    | 0      | 0     | 0      | 0                | 0                 | 1             | 23            | 19                  | 0           | 0          | 0          |

ID: 18625446  
 name: MN-R-Sens-B2-ACp-10

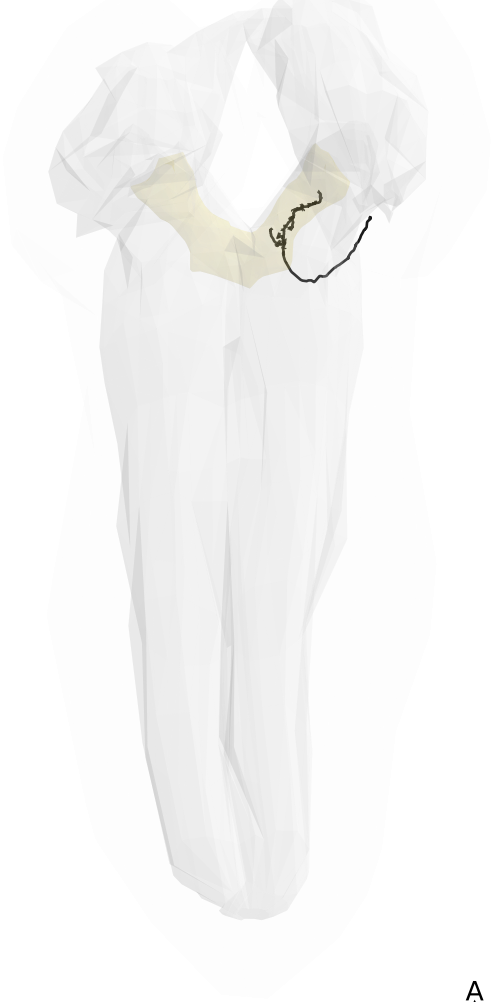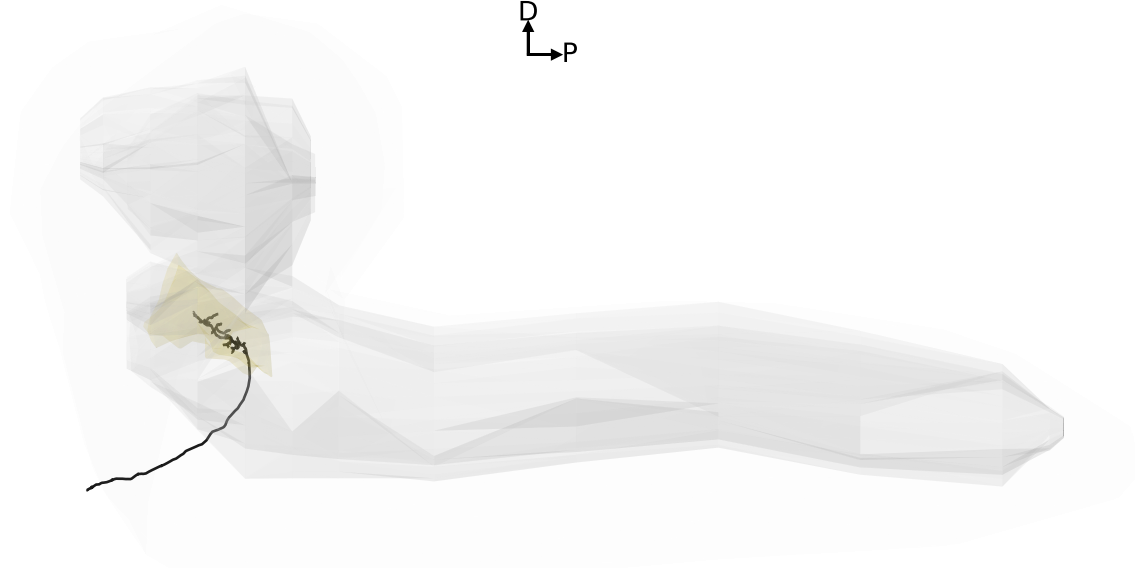

| <i>ID</i> | <i>name</i>         | SCACa | SCAVa | SCAVp | SCACal | SCACp | SCACpl | SCVM | IPCs | DMS | DH44 | Se0ens | Se0ph | PMN LR | MN motor neurons | PaN motor neurons | olfactory PNs | gustatory PNs | multiglomerular PNs | unknown PNs | thermo PNs | visual PNs |
|-----------|---------------------|-------|-------|-------|--------|-------|--------|------|------|-----|------|--------|-------|--------|------------------|-------------------|---------------|---------------|---------------------|-------------|------------|------------|
| 18625446  | MN-R-Sens-B2-ACp-10 | 0     | 0     | 0     | 0      | 5     | 0      | 2    | 0    | 0   | 0    | 0      | 0     | 0      | 0                | 0                 | 1             | 0             | 14                  | 0           | 0          | 0          |



ID: 15556081  
 name: MN-R-Sens-B2-ACp-11

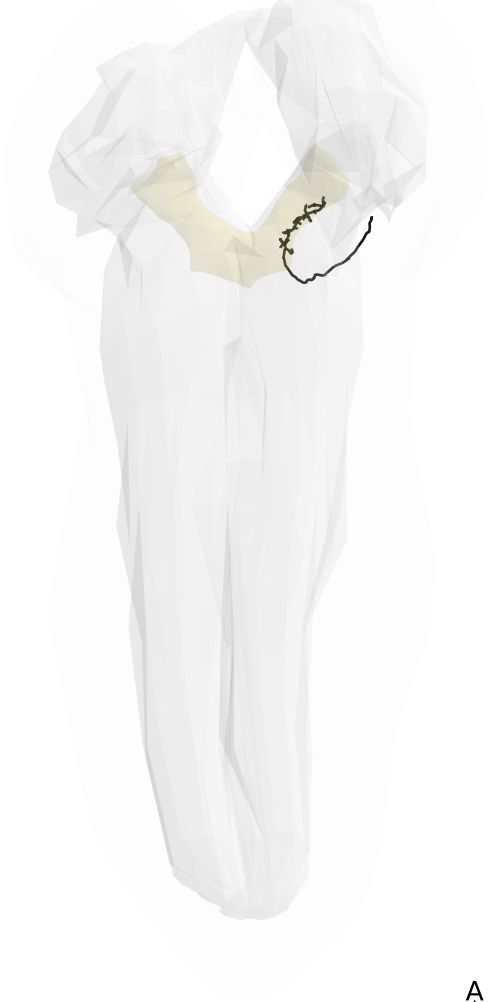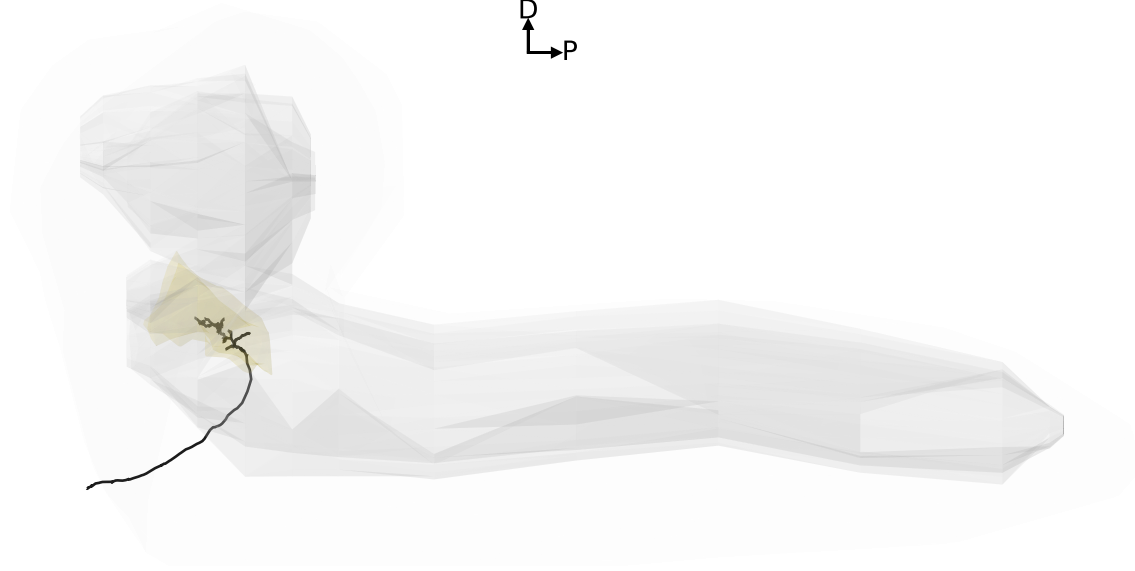

| <i>ID</i> | <i>name</i>         | SCACa | SCAVa | SCAVp | SCACal | SCACp | SCACpl | SCVM | IPCs | DMS | DH44 | Se0ens | Se0ph | PMN LR | MN motor neurons | PaN motor neurons | olfactory PNs | gustatory PNs | multiglomerular PNs | unknown PNs | thermo PNs | visual PNs |
|-----------|---------------------|-------|-------|-------|--------|-------|--------|------|------|-----|------|--------|-------|--------|------------------|-------------------|---------------|---------------|---------------------|-------------|------------|------------|
| 15556081  | MN-R-Sens-B2-ACp-11 | 0     | 0     | 0     | 0      | 5     | 0      | 0    | 0    | 0   | 0    | 0      | 0     | 0      | 0                | 0                 | 0             | 0             | 17                  | 0           | 0          | 0          |

ID: 15588691  
 name: MN-R-Sens-B2-ACp-12

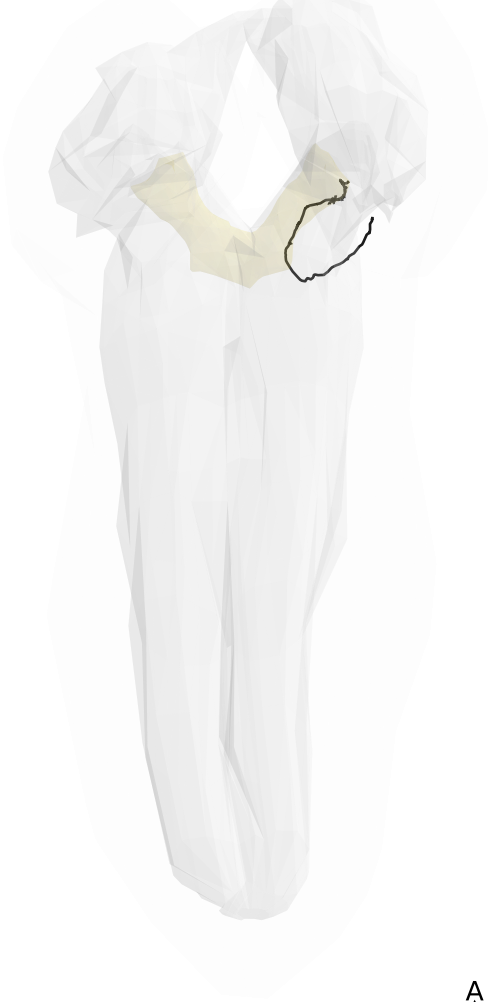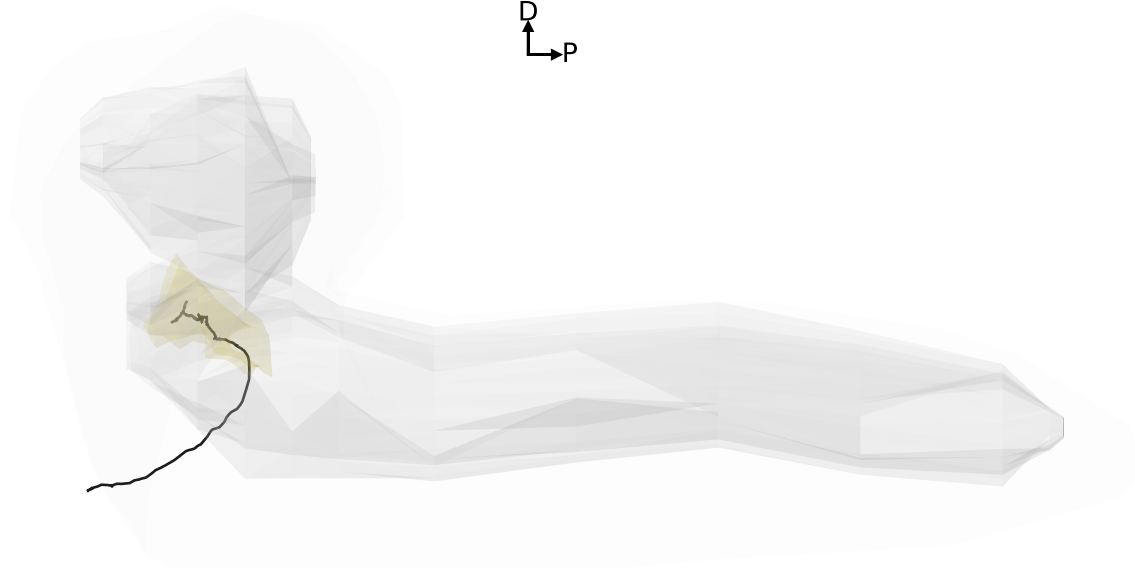

| <i>ID</i> | <i>name</i>         | SCACa | SCAVa | SCAVp | SCACal | SCACp | SCACpl | SCVM | IPCs | DMS | DH44 | Se0ens | Se0ph | PMN LR | MN motor neurons | PaN motor neurons | olfactory PNs | gustatory PNs | multiglomerular PNs | unknown PNs | thermo PNs | visual PNs |
|-----------|---------------------|-------|-------|-------|--------|-------|--------|------|------|-----|------|--------|-------|--------|------------------|-------------------|---------------|---------------|---------------------|-------------|------------|------------|
| 15588691  | MN-R-Sens-B2-ACp-12 | 0     | 0     | 0     | 0      | 1     | 0      | 0    | 0    | 0   | 0    | 0      | 0     | 0      | 0                | 0                 | 1             | 0             | 15                  | 0           | 0          | 0          |

ID: 3071301  
 name: MN-R-Sens-B2-ACp-13

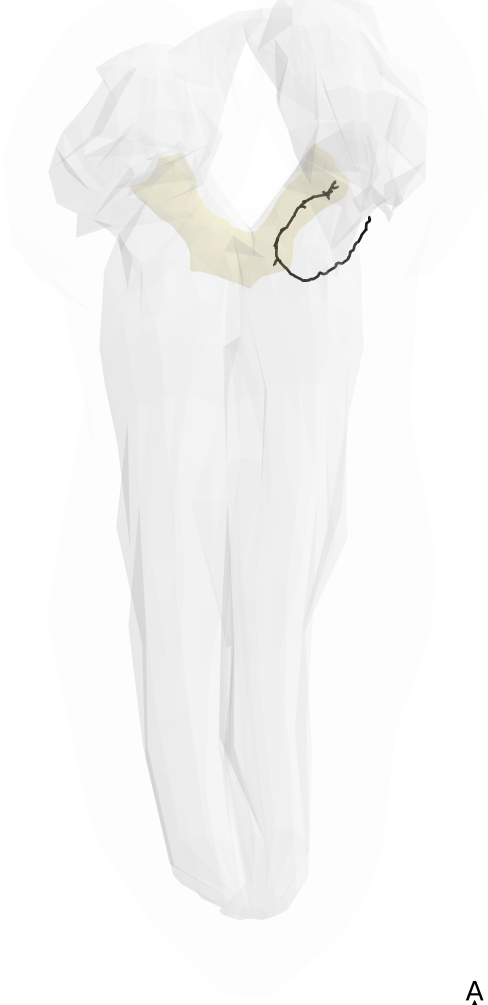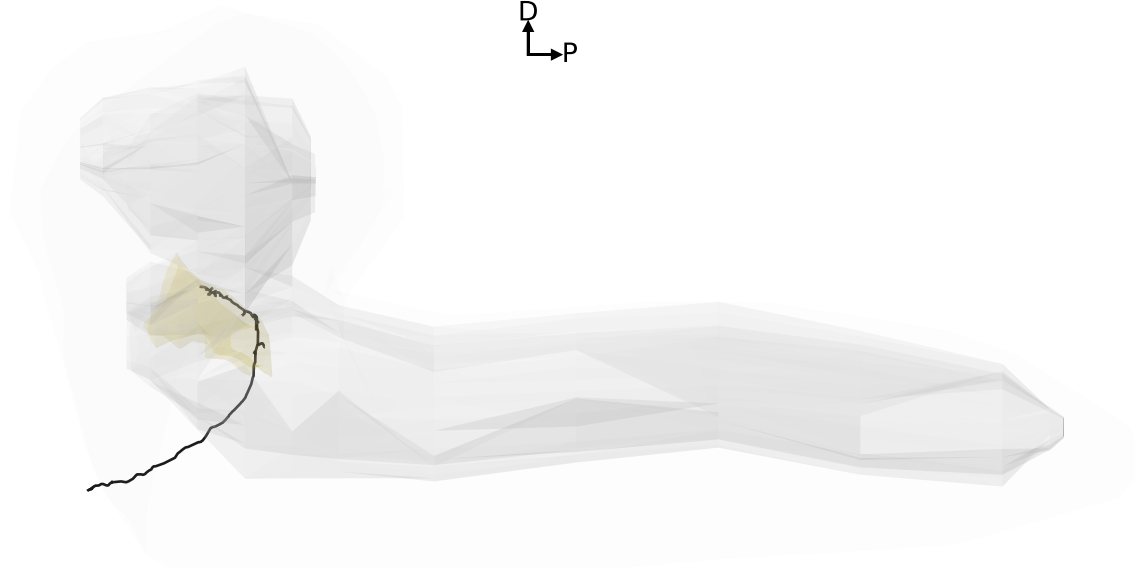

| <i>ID</i> | <i>name</i>         | SCACa | SCAVa | SCAVp | SCACal | SCACp | SCACpl | SCVM | IPCs | DMS | DH44 | Se0ens | Se0ph | PMN LR | MN motor neurons | PaN motor neurons | olfactory PNs | gustatory PNs | multiglomerular PNs | unknown PNs | thermo PNs | visual PNs |
|-----------|---------------------|-------|-------|-------|--------|-------|--------|------|------|-----|------|--------|-------|--------|------------------|-------------------|---------------|---------------|---------------------|-------------|------------|------------|
| 3071301   | MN-R-Sens-B2-ACp-13 | 0     | 0     | 0     | 0      | 0     | 0      | 0    | 0    | 0   | 0    | 0      | 0     | 0      | 0                | 0                 | 1             | 0             | 3                   | 0           | 0          | 0          |

ID: 12253020  
 name: MN-R-Sens-B2-ACp-14

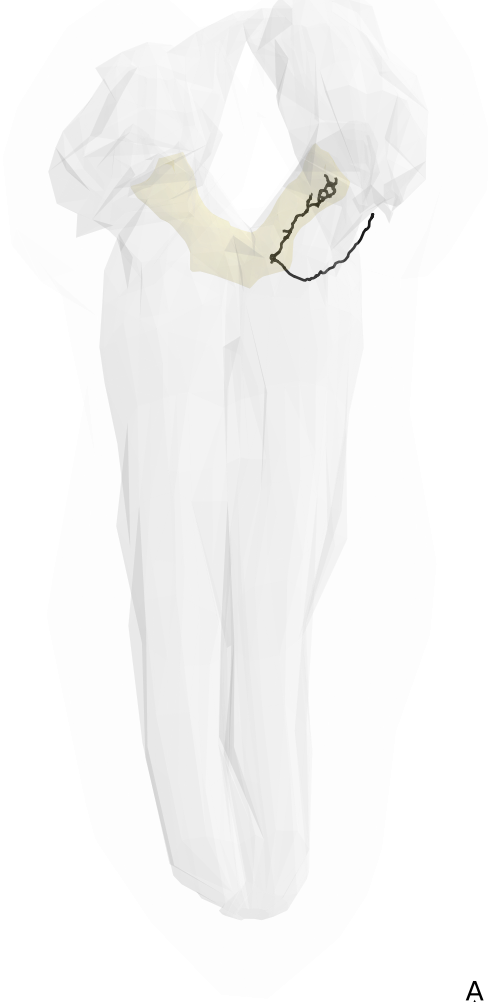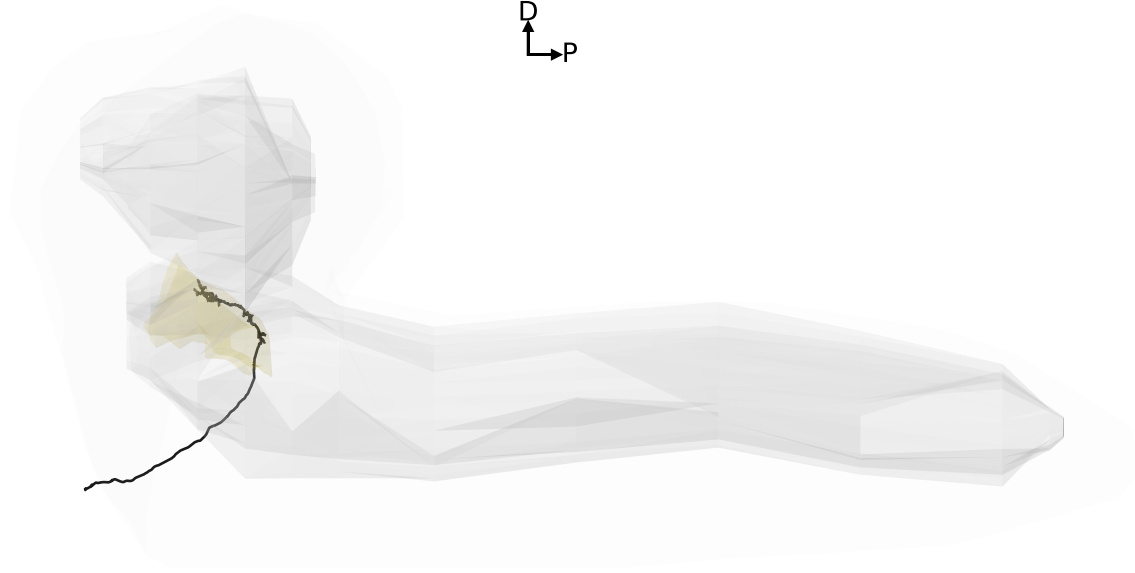

| <i>ID</i> | <i>name</i>         | SCACa | SCAVa | SCAVp | SCACal | SCACp | SCACpl | SCVM | IPCs | DMS | DH44 | Se0ens | Se0ph | PMN LR | MN motor neurons | PaN motor neurons | olfactory PNs | gustatory PNs | multiglomerular PNs | unknown PNs | thermo PNs | visual PNs |
|-----------|---------------------|-------|-------|-------|--------|-------|--------|------|------|-----|------|--------|-------|--------|------------------|-------------------|---------------|---------------|---------------------|-------------|------------|------------|
| 12253020  | MN-R-Sens-B2-ACp-14 | 0     | 0     | 0     | 0      | 4     | 0      | 0    | 0    | 0   | 0    | 0      | 0     | 0      | 0                | 0                 | 3             | 0             | 4                   | 0           | 0          | 0          |



ID: 15615081  
 name: MN-R-Sens-B2-ACp-16

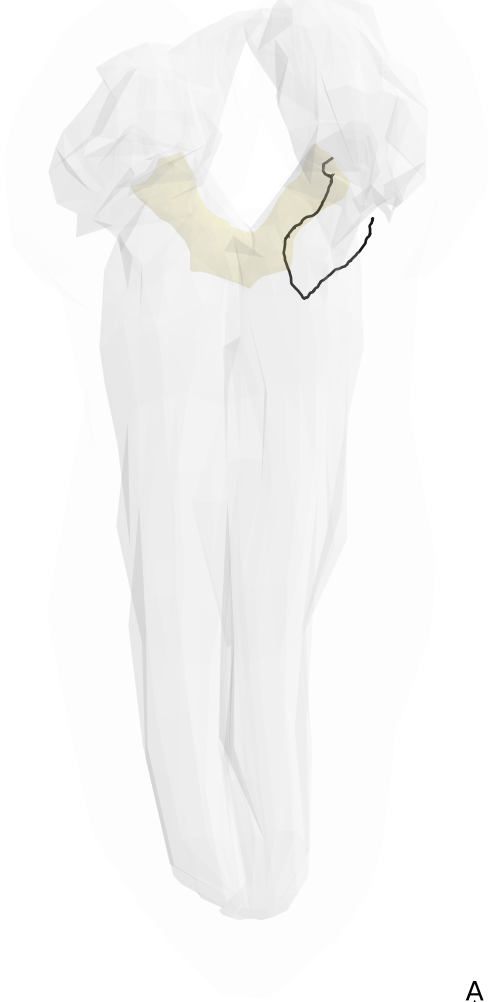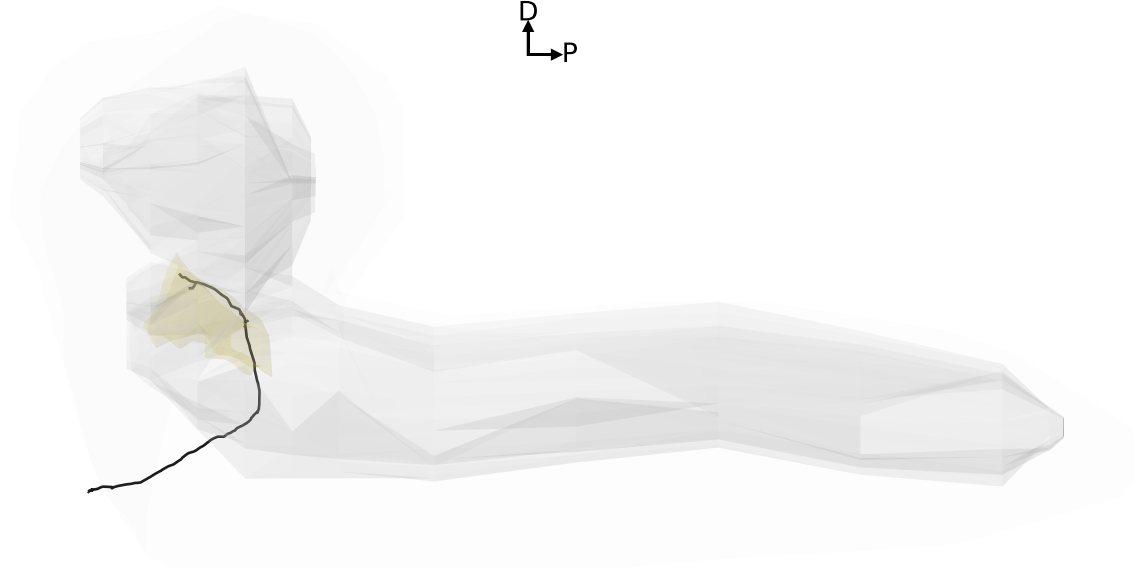

| <i>ID</i> | <i>name</i>         | SCACa | SCAVa | SCAVp | SCACal | SCACp | SCACpl | SCVM | IPCs | DMS | DH44 | Se0ens | Se0ph | PMN LR | MN motor neurons | PaN motor neurons | olfactory PNs | gustatory PNs | multiglomerular PNs | unknown PNs | thermo PNs | visual PNs |
|-----------|---------------------|-------|-------|-------|--------|-------|--------|------|------|-----|------|--------|-------|--------|------------------|-------------------|---------------|---------------|---------------------|-------------|------------|------------|
| 15615081  | MN-R-Sens-B2-ACp-16 | 0     | 0     | 0     | 0      | 0     | 0      | 0    | 0    | 0   | 0    | 0      | 0     | 0      | 0                | 0                 | 0             | 1             | 6                   | 0           | 0          | 0          |

ID: 15609885  
 name: MN-R-Sens-B2-ACp-17

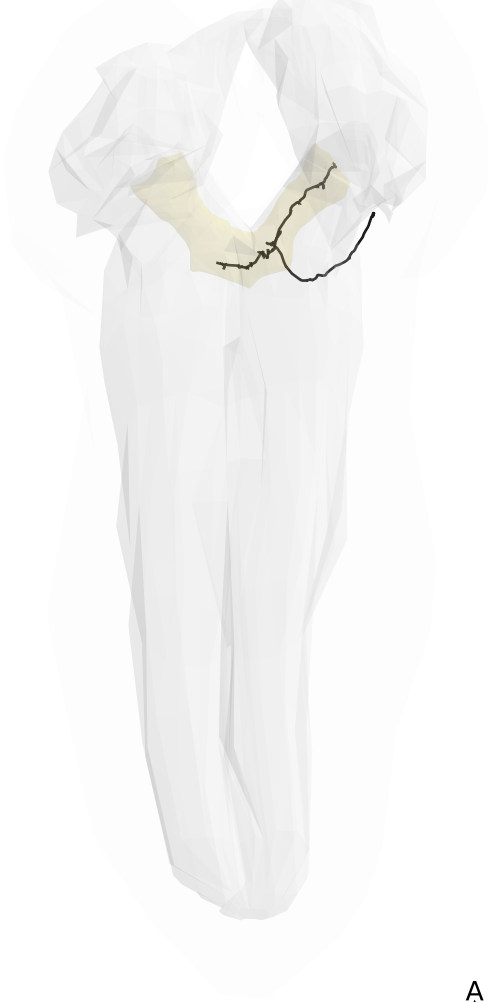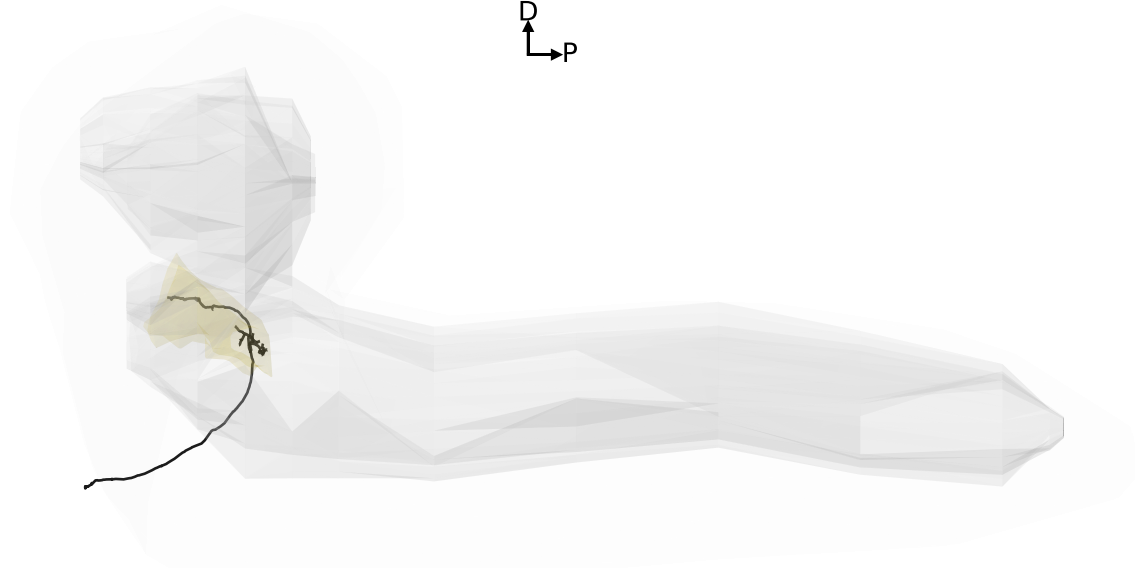

| <i>ID</i> | <i>name</i>         | SCACa | SCAVa | SCAVp | SCACal | SCACp | SCACpl | SCVM | IPCs | DMS | DH44 | Se0ens | Se0ph | PMN LR | MN motor neurons | PaN motor neurons | olfactory PNs | gustatory PNs | multiglomerular PNs | unknown PNs | thermo PNs | visual PNs |
|-----------|---------------------|-------|-------|-------|--------|-------|--------|------|------|-----|------|--------|-------|--------|------------------|-------------------|---------------|---------------|---------------------|-------------|------------|------------|
| 15609885  | MN-R-Sens-B2-ACp-17 | 0     | 0     | 0     | 0      | 3     | 0      | 0    | 0    | 0   | 0    | 0      | 0     | 0      | 0                | 0                 | 2             | 4             | 4                   | 0           | 0          | 0          |

ID: 10934438  
 name: MN-R-Sens-B2-ACp-18

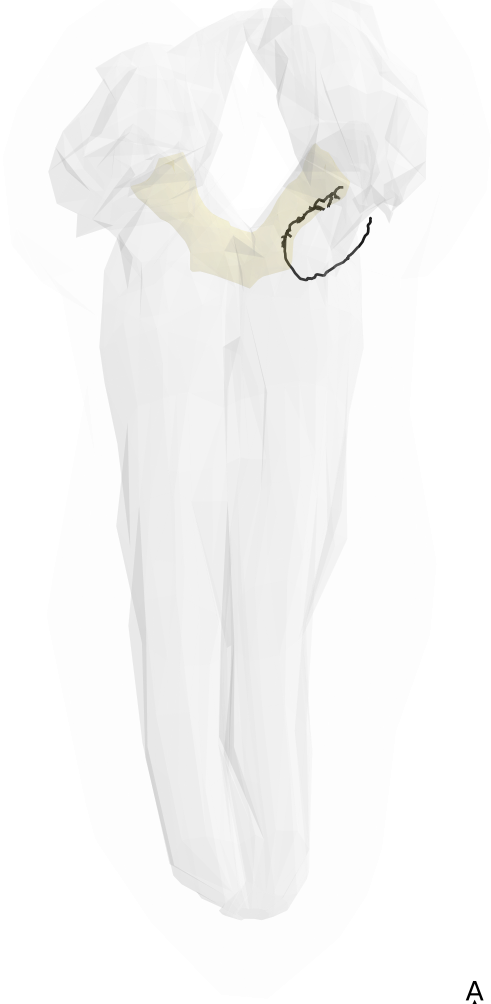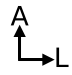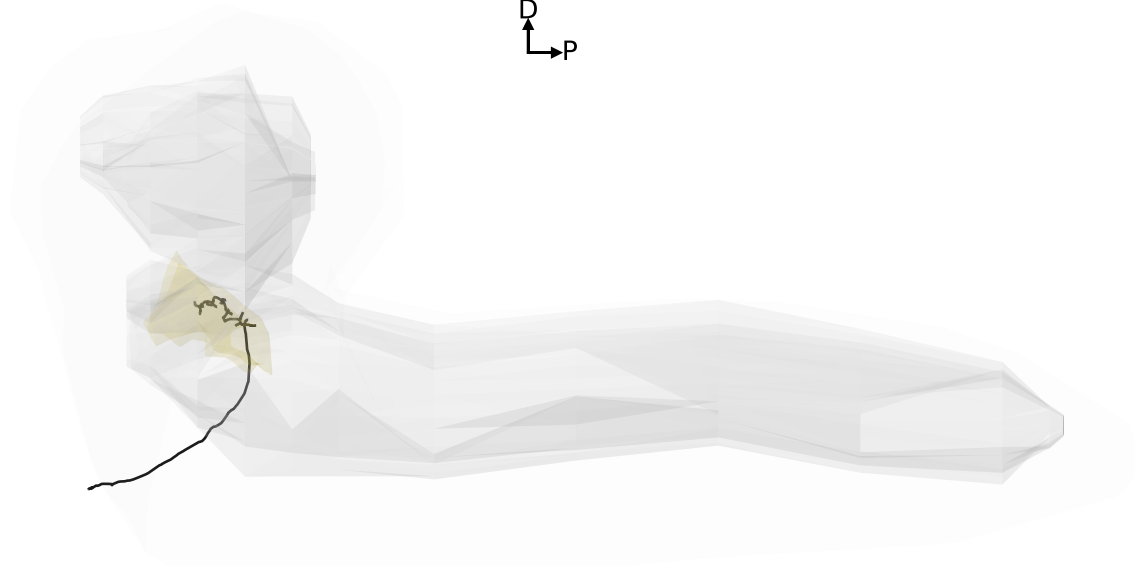

| <i>ID</i> | <i>name</i>         | SCACa | SCAVa | SCAVp | SCACal | SCACp | SCACpl | SCVM | IPCs | DMS | DH44 | Se0ens | Se0ph | PMN LR | MN motor neurons | PaN motor neurons | olfactory PNs | gustatory PNs | multiglomerular PNs | unknown PNs | thermo PNs | visual PNs |
|-----------|---------------------|-------|-------|-------|--------|-------|--------|------|------|-----|------|--------|-------|--------|------------------|-------------------|---------------|---------------|---------------------|-------------|------------|------------|
| 10934438  | MN-R-Sens-B2-ACp-18 | 0     | 0     | 0     | 0      | 1     | 0      | 0    | 0    | 0   | 0    | 0      | 0     | 0      | 0                | 0                 | 0             | 0             | 1                   | 0           | 0          | 0          |





ID: 15588800  
name: MN-R-Sens-B2-ACp-20

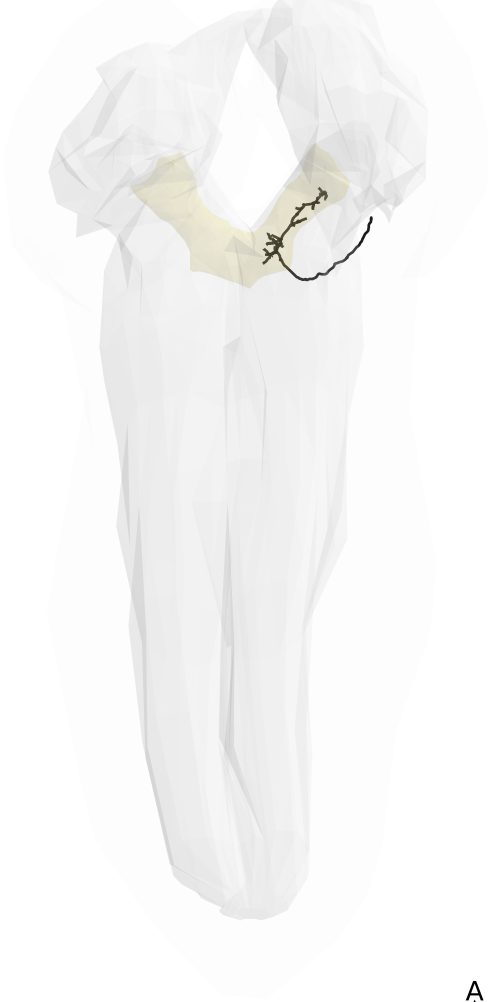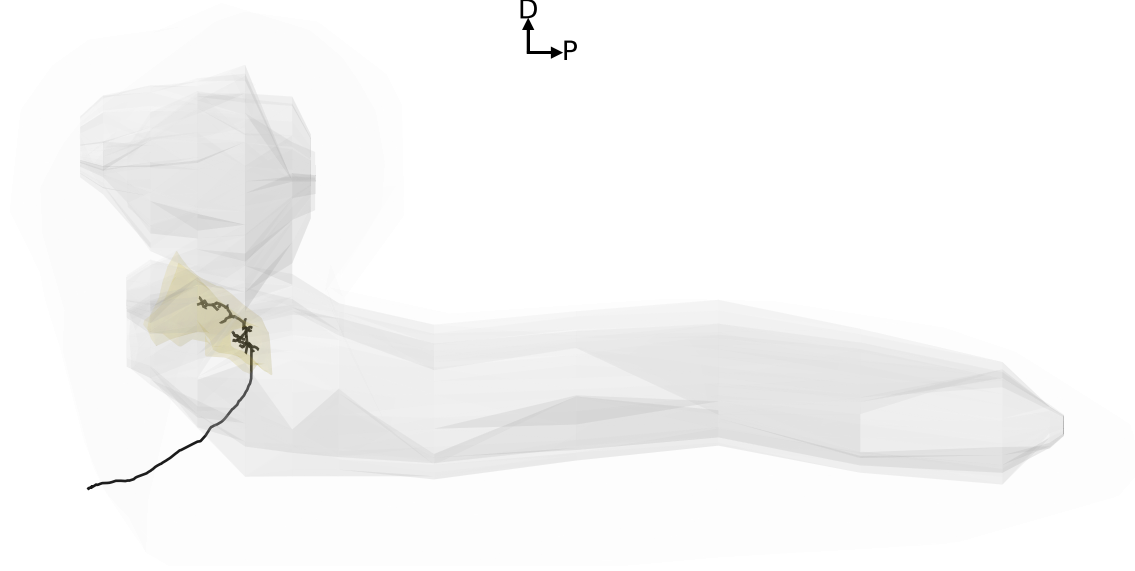

| <i>ID</i> | <i>name</i>         | SCACa | SCAVa | SCAVp | SCACal | SCACp | SCACpl | SCVM | IPCs | DMS | DH44 | Se0ens | Se0ph | PMN LR | MN motor neurons | PaN motor neurons | olfactory PNs | gustatory PNs | multiglomerular PNs | unknown PNs | thermo PNs | visual PNs |
|-----------|---------------------|-------|-------|-------|--------|-------|--------|------|------|-----|------|--------|-------|--------|------------------|-------------------|---------------|---------------|---------------------|-------------|------------|------------|
| 15588800  | MN-R-Sens-B2-ACp-20 | 0     | 0     | 0     | 0      | 6     | 0      | 0    | 0    | 0   | 0    | 0      | 0     | 0      | 0                | 0                 | 7             | 0             | 2                   | 0           | 0          | 0          |

ID: 15589411  
 name: MN-R-Sens-B2-ACp-21

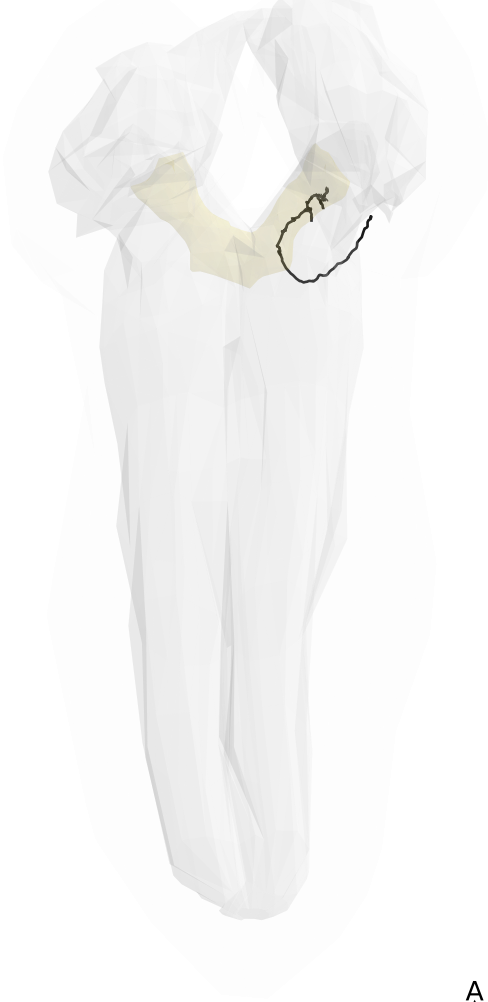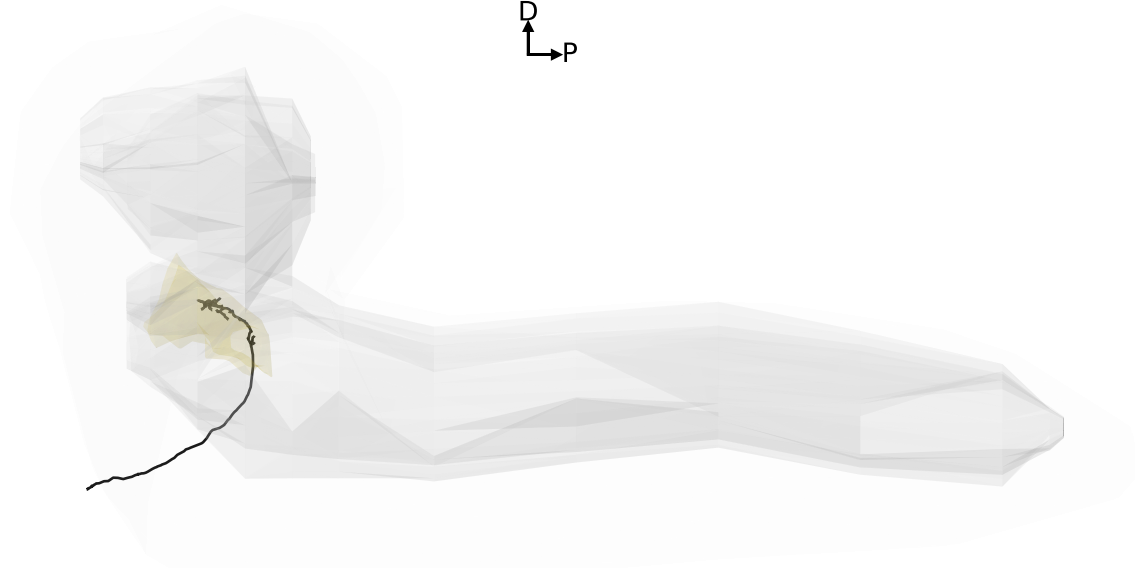

| <i>ID</i> | <i>name</i>         | SCACa | SCAVa | SCAVp | SCACal | SCACp | SCACpl | SCVM | IPCs | DMS | DH44 | Se0ens | Se0ph | PMN LR | MN motor neurons | PaN motor neurons | olfactory PNs | gustatory PNs | multiglomerular PNs | unknown PNs | thermo PNs | visual PNs |
|-----------|---------------------|-------|-------|-------|--------|-------|--------|------|------|-----|------|--------|-------|--------|------------------|-------------------|---------------|---------------|---------------------|-------------|------------|------------|
| 15589411  | MN-R-Sens-B2-ACp-21 | 0     | 0     | 0     | 0      | 2     | 0      | 0    | 0    | 0   | 0    | 0      | 0     | 0      | 0                | 0                 | 3             | 0             | 0                   | 0           | 0          | 0          |



ID: 15641926  
 name: MN-R-Sens-B3-ACp-01

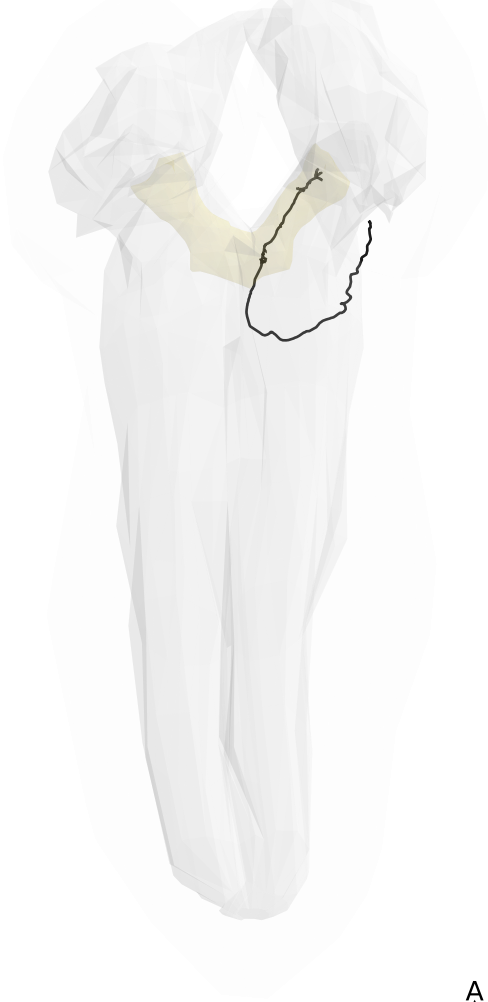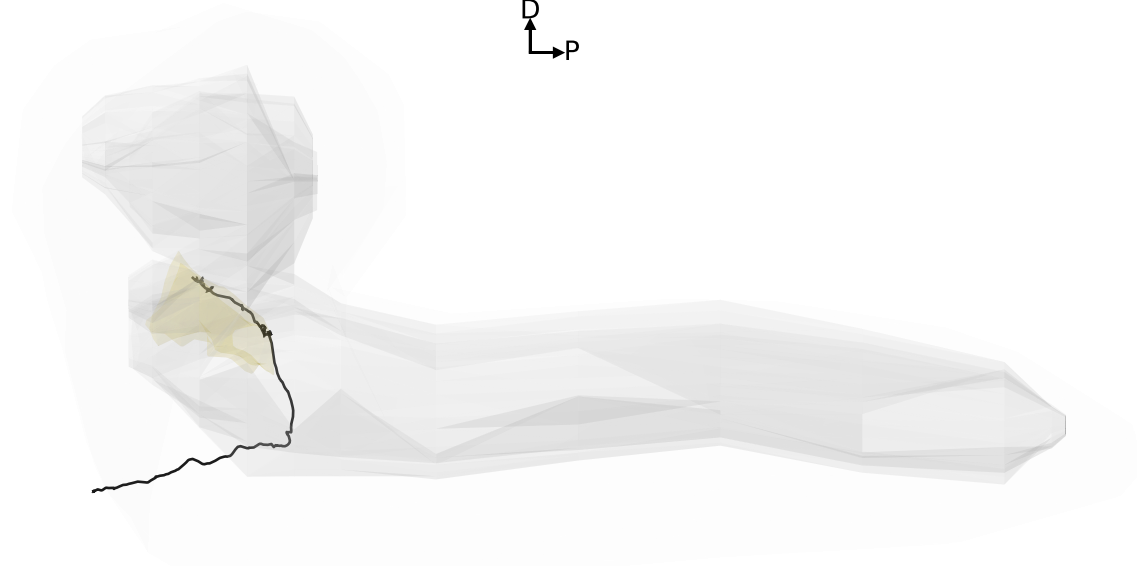

| <i>ID</i> | <i>name</i>         | SCACa | SCAVa | SCAVp | SCACal | SCACp | SCACpl | SCVM | IPCs | DMS | DH44 | Se0ens | Se0ph | PMN LR | MN motor neurons | PaN motor neurons | olfactory PNs | gustatory PNs | multiglomerular PNs | unknown PNs | thermo PNs | visual PNs |
|-----------|---------------------|-------|-------|-------|--------|-------|--------|------|------|-----|------|--------|-------|--------|------------------|-------------------|---------------|---------------|---------------------|-------------|------------|------------|
| 15641926  | MN-R-Sens-B3-ACp-01 | 0     | 0     | 0     | 0      | 17    | 0      | 0    | 0    | 0   | 0    | 0      | 0     | 0      | 0                | 0                 | 1             | 0             | 0                   | 0           | 1          | 0          |

ID: 15639171  
 name: MN-R-Sens-B3-ACp-02

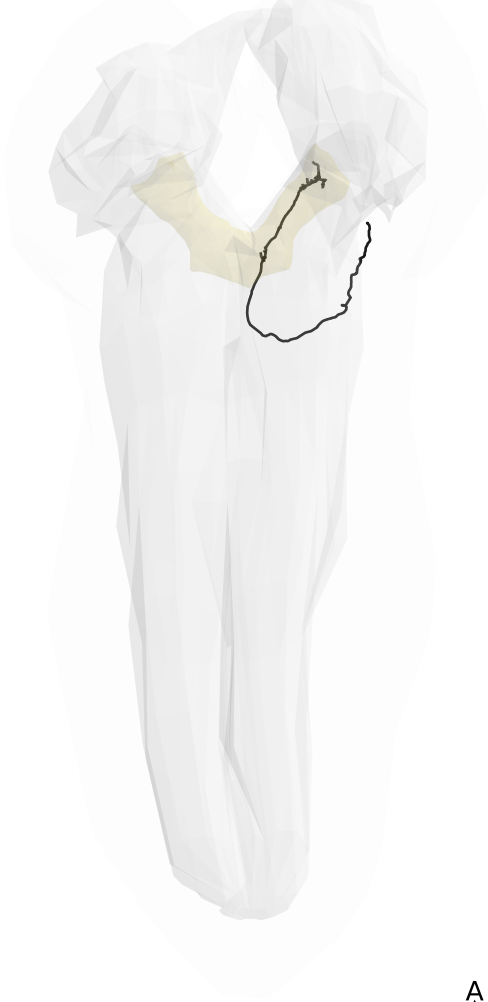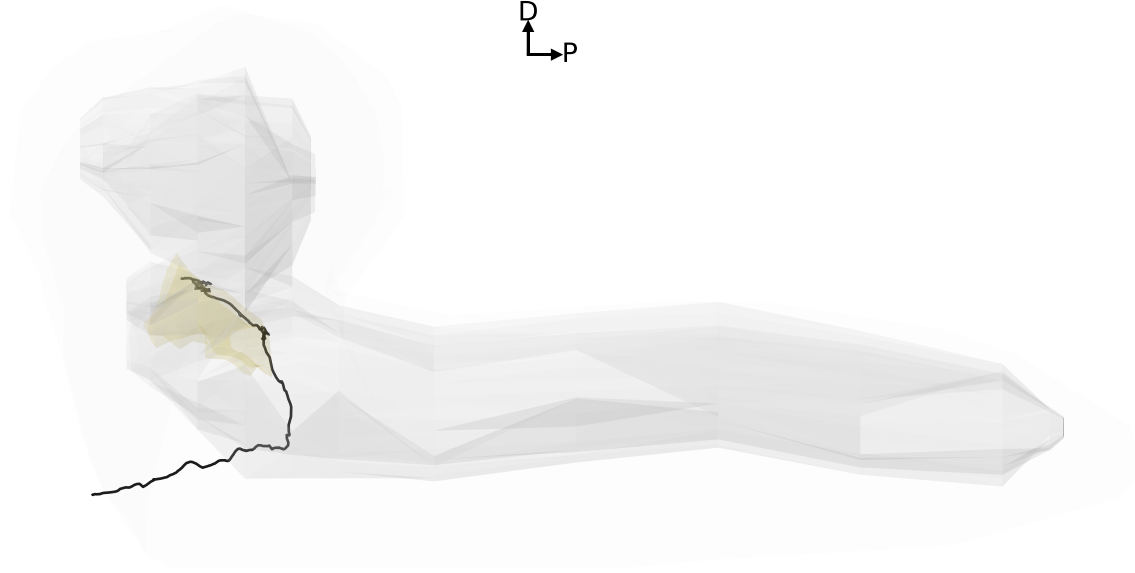

| <i>ID</i> | <i>name</i>         | SCACa | SCAVa | SCAVp | SCACal | SCACp | SCACpl | SCVM | IPCs | DMS | DH44 | Se0ens | Se0ph | PMN LR | MN motor neurons | PaN motor neurons | olfactory PNs | gustatory PNs | multiglomerular PNs | unknown PNs | thermo PNs | visual PNs |
|-----------|---------------------|-------|-------|-------|--------|-------|--------|------|------|-----|------|--------|-------|--------|------------------|-------------------|---------------|---------------|---------------------|-------------|------------|------------|
| 15639171  | MN-R-Sens-B3-ACp-02 | 0     | 0     | 0     | 0      | 18    | 0      | 0    | 0    | 0   | 0    | 0      | 0     | 0      | 0                | 0                 | 2             | 0             | 0                   | 0           | 0          | 0          |

ID: 15640893  
 name: MN-R-Sens-B3-ACp-03

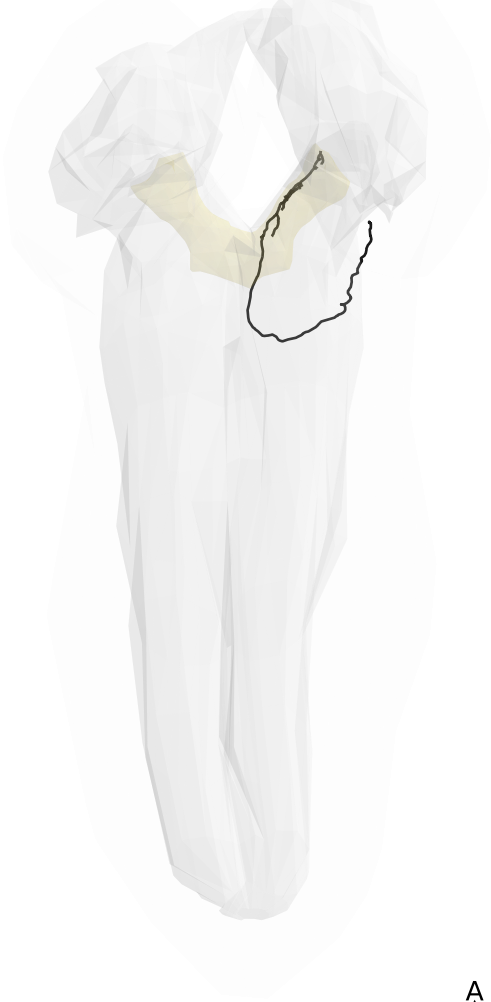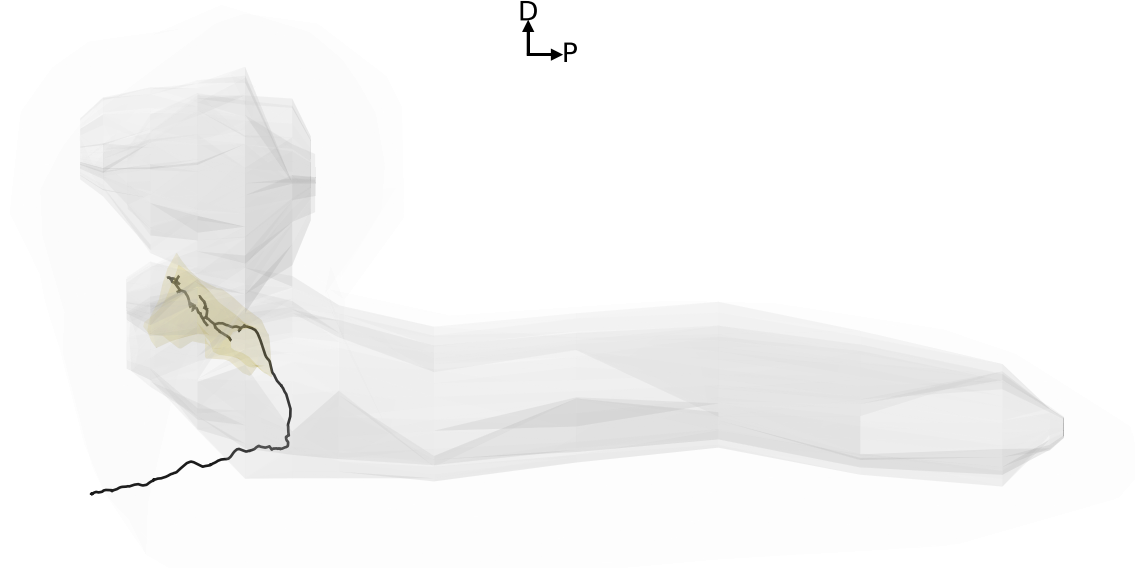

| <i>ID</i> | <i>name</i>         | SCACa | SCAVa | SCAVp | SCACal | SCACp | SCACpl | SCVM | IPCs | DMS | DH44 | Se0ens | Se0ph | PMN LR | MN motor neurons | PaN motor neurons | olfactory PNs | gustatory PNs | multiglomerular PNs | unknown PNs | thermo PNs | visual PNs |
|-----------|---------------------|-------|-------|-------|--------|-------|--------|------|------|-----|------|--------|-------|--------|------------------|-------------------|---------------|---------------|---------------------|-------------|------------|------------|
| 15640893  | MN-R-Sens-B3-ACp-03 | 1     | 0     | 0     | 0      | 4     | 0      | 0    | 0    | 0   | 1    | 0      | 0     | 0      | 0                | 0                 | 0             | 7             | 1                   | 0           | 0          | 0          |

ID: 15639020  
 name: MN-R-Sens-B3-ACp-04

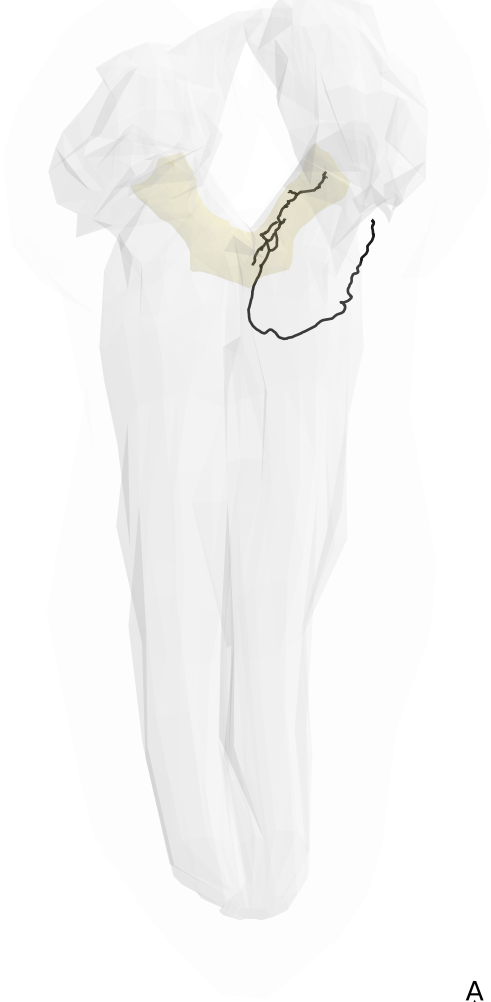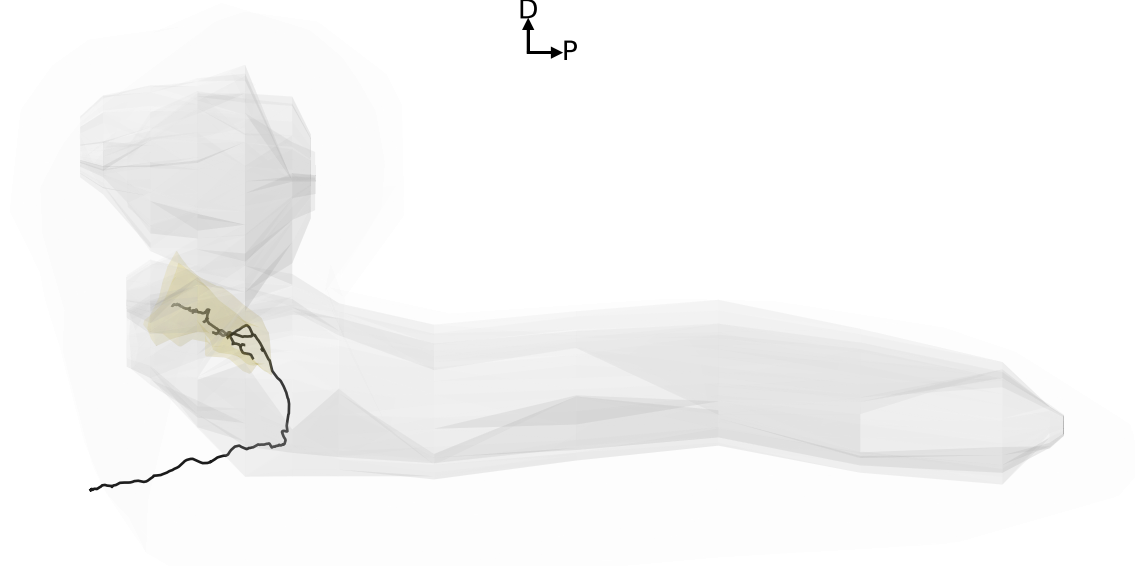

| <i>ID</i> | <i>name</i>         | SCACa | SCAVa | SCAVp | SCACal | SCACp | SCACpl | SCVM | IPCs | DMS | DH44 | Se0ens | Se0ph | PMN LR | MN motor neurons | PaN motor neurons | olfactory PNs | gustatory PNs | multiglomerular PNs | unknown PNs | thermo PNs | visual PNs |
|-----------|---------------------|-------|-------|-------|--------|-------|--------|------|------|-----|------|--------|-------|--------|------------------|-------------------|---------------|---------------|---------------------|-------------|------------|------------|
| 15639020  | MN-R-Sens-B3-ACp-04 | 0     | 0     | 0     | 0      | 4     | 0      | 0    | 0    | 0   | 0    | 0      | 0     | 0      | 0                | 0                 | 1             | 0             | 0                   | 0           | 0          | 0          |



ID: 3199456  
 name: MN-R-Sens-B3-ACp-05

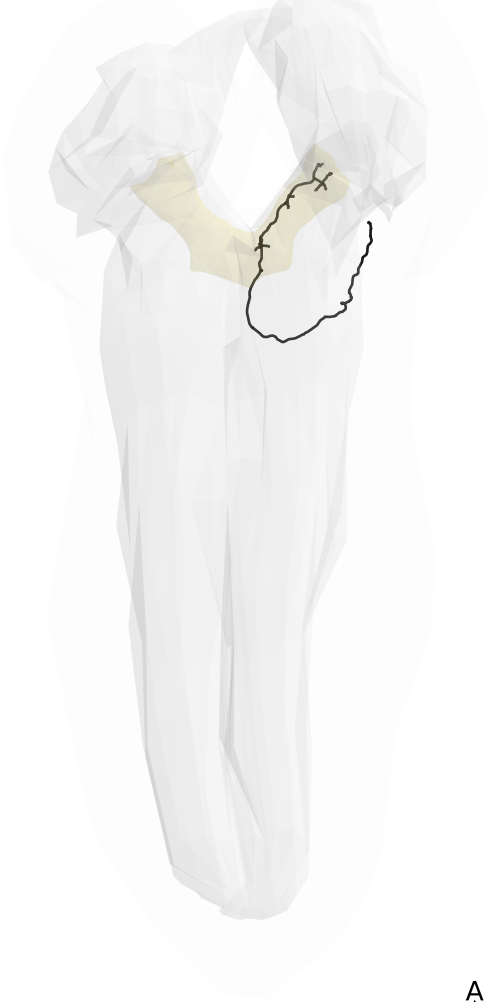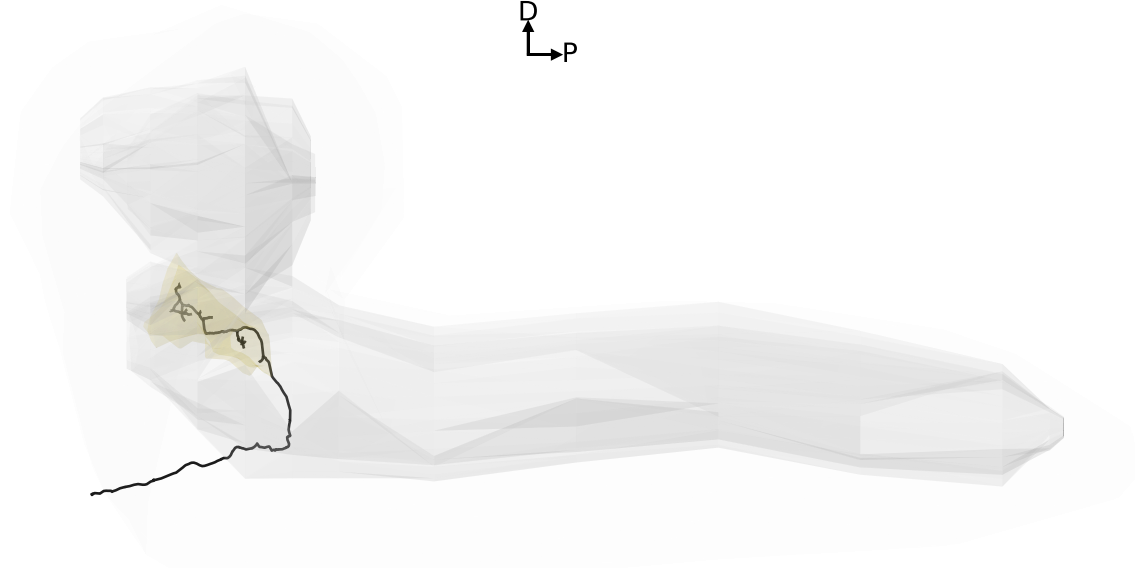

| <i>ID</i> | <i>name</i>         | SCACa | SCAVa | SCAVp | SCACal | SCACp | SCACpl | SCVM | IPCs | DMS | DH44 | Se0ens | Se0ph | PMN LR | MN motor neurons | PaN motor neurons | olfactory PNs | gustatory PNs | multiglomerular PNs | unknown PNs | thermo PNs | visual PNs |
|-----------|---------------------|-------|-------|-------|--------|-------|--------|------|------|-----|------|--------|-------|--------|------------------|-------------------|---------------|---------------|---------------------|-------------|------------|------------|
| 3199456   | MN-R-Sens-B3-ACp-05 | 0     | 0     | 0     | 0      | 9     | 0      | 0    | 0    | 0   | 0    | 0      | 0     | 0      | 0                | 0                 | 0             | 1             | 4                   | 0           | 0          | 0          |





ID: 4097554  
 name: AN-R-Sens-B3-ACpl-10

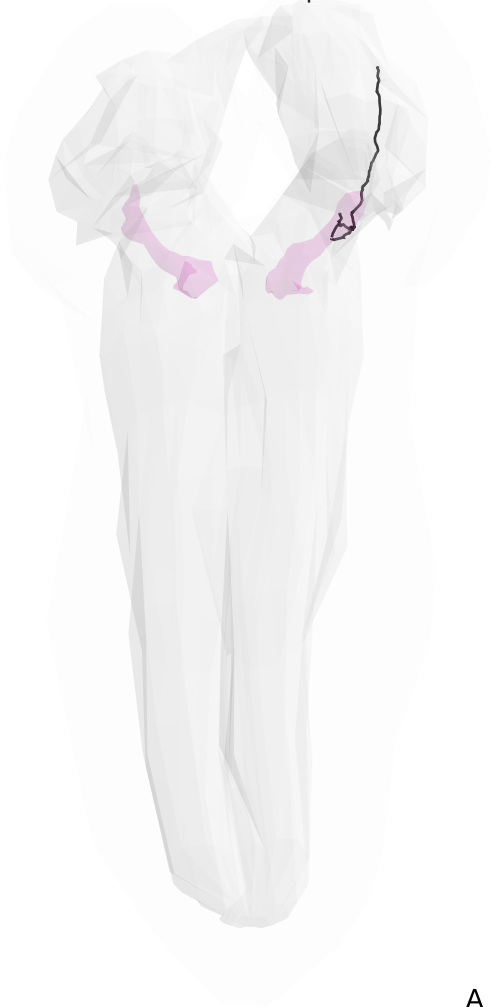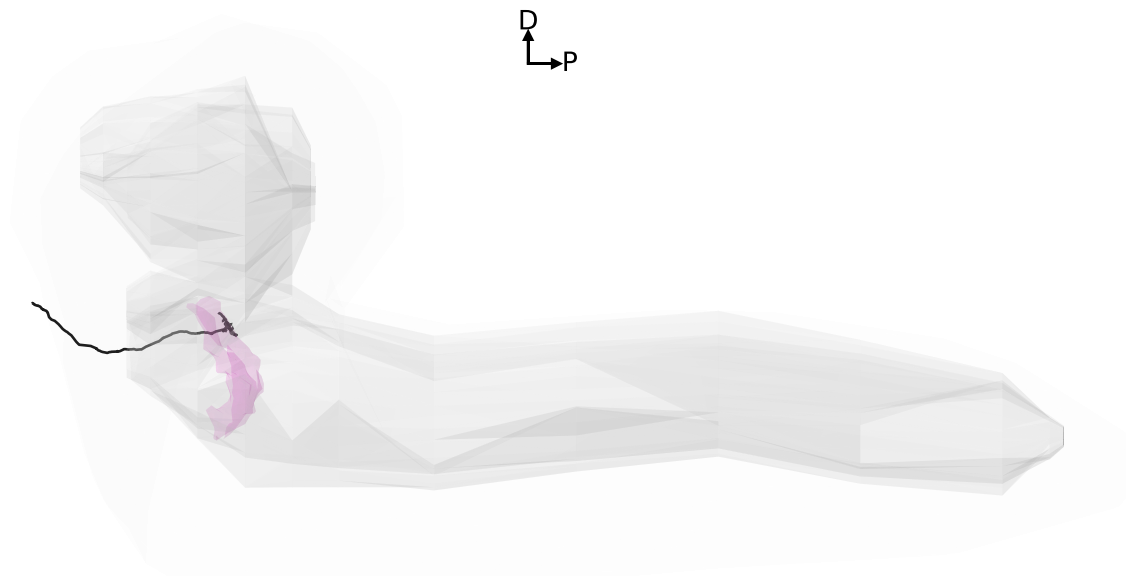

| <i>ID</i> | <i>name</i>          | SCACa | SCAVa | SCAVp | SCACal | SCACp | SCACpl | SCVM | IPCs | DMS | DH44 | Se0ens | Se0ph | PMN LR | MN motor neurons | PaN motor neurons | olfactory PNs | gustatory PNs | multiglomerular PNs | unknown PNs | thermo PNs | visual PNs |
|-----------|----------------------|-------|-------|-------|--------|-------|--------|------|------|-----|------|--------|-------|--------|------------------|-------------------|---------------|---------------|---------------------|-------------|------------|------------|
| 4097554   | AN-R-Sens-B3-ACpl-10 | 0     | 0     | 0     | 0      | 0     | 0      | 0    | 0    | 0   | 0    | 0      | 0     | 0      | 0                | 0                 | 0             | 0             | 3                   | 0           | 0          | 0          |

ID: 8055671  
 name: MN-L-Sens-B1-ACpl-01

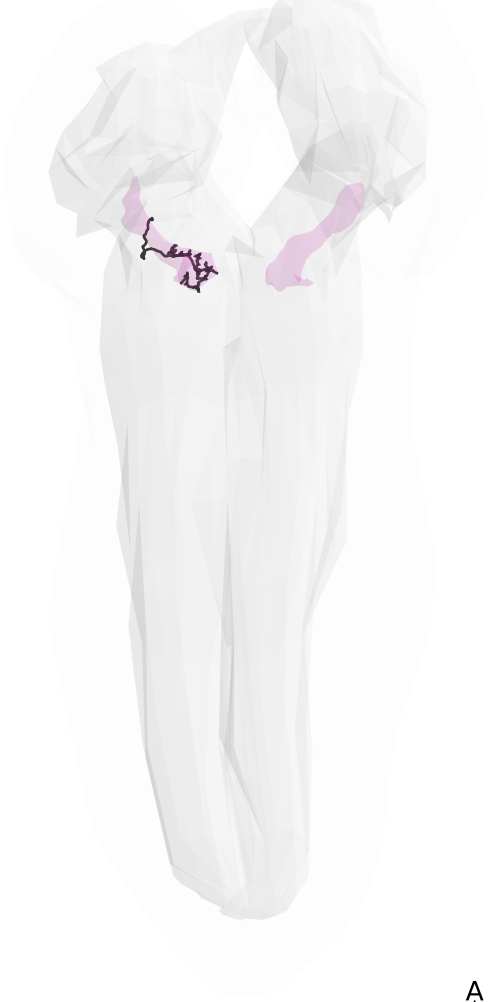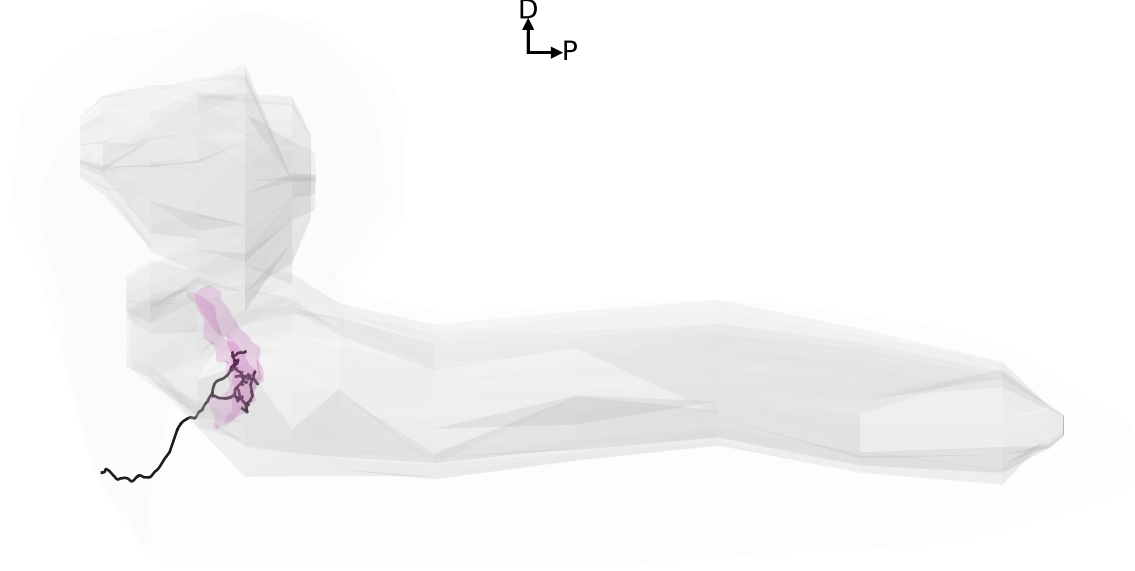

| <i>ID</i> | <i>name</i>          | SCACa | SCAVa | SCAVp | SCACal | SCACp | SCACpl | SCVM | IPCs | DMS | DH44 | Se0ens | Se0ph | PMN LR | MN motor neurons | PaN motor neurons | olfactory PNs | gustatory PNs | multiglomerular PNs | unknown PNs | thermo PNs | visual PNs |
|-----------|----------------------|-------|-------|-------|--------|-------|--------|------|------|-----|------|--------|-------|--------|------------------|-------------------|---------------|---------------|---------------------|-------------|------------|------------|
| 8055671   | MN-L-Sens-B1-ACpl-01 | 0     | 0     | 0     | 0      | 0     | 2      | 0    | 0    | 0   | 0    | 0      | 0     | 0      | 0                | 0                 | 0             | 0             | 3                   | 0           | 0          | 0          |

ID: 15714639  
 name: MN-L-Sens-B2-ACpl-01

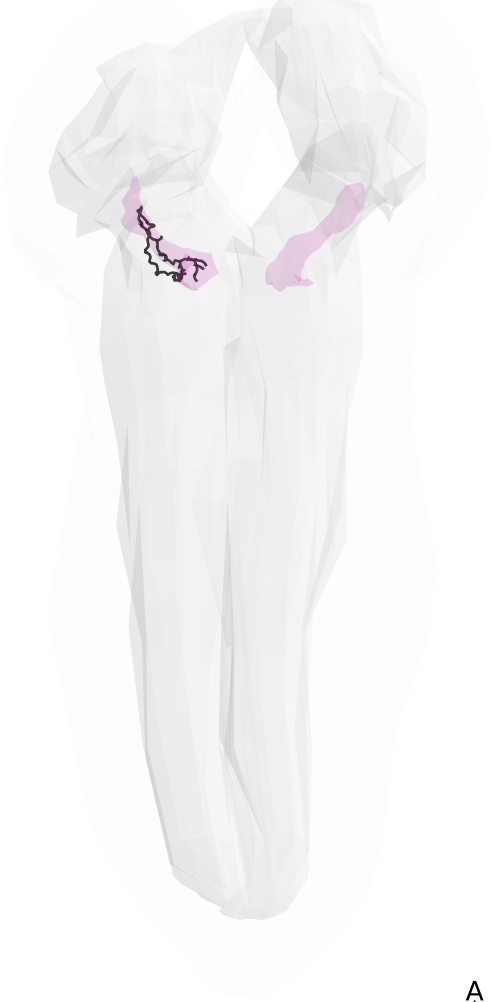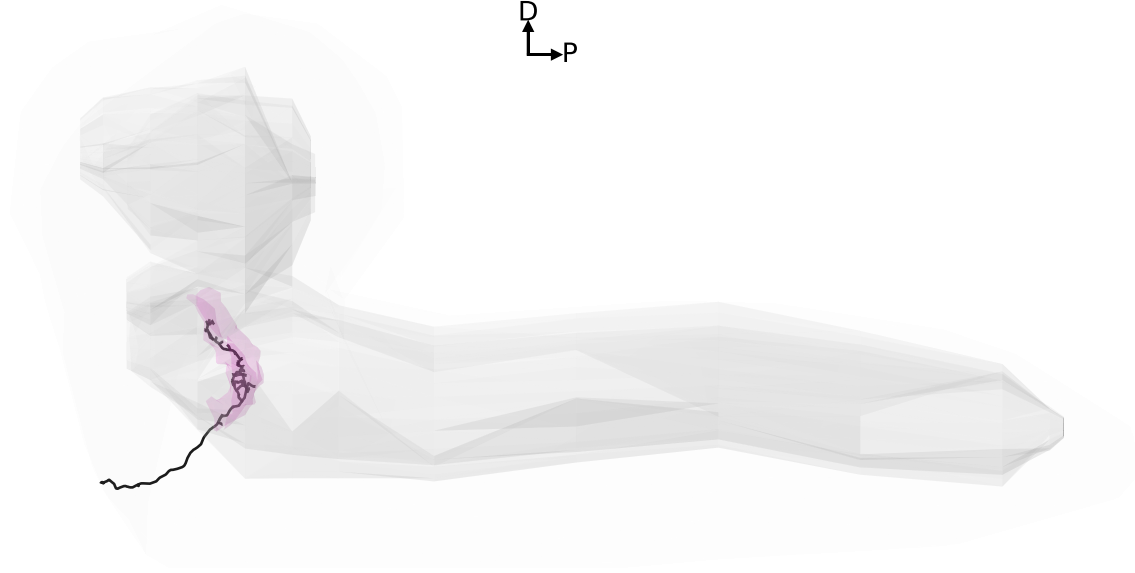

| <i>ID</i> | <i>name</i>          | SCACa | SCAVa | SCAVp | SCACal | SCACp | SCACpl | SCVM | IPCs | DMS | DH44 | Se0ens | Se0ph | PMN LR | MN motor neurons | PaN motor neurons | olfactory PNs | gustatory PNs | multiglomerular PNs | unknown PNs | thermo PNs | visual PNs |
|-----------|----------------------|-------|-------|-------|--------|-------|--------|------|------|-----|------|--------|-------|--------|------------------|-------------------|---------------|---------------|---------------------|-------------|------------|------------|
| 15714639  | MN-L-Sens-B2-ACpl-01 | 0     | 0     | 0     | 0      | 0     | 1      | 2    | 0    | 0   | 0    | 0      | 0     | 0      | 0                | 0                 | 0             | 0             | 23                  | 0           | 0          | 0          |



ID: 15673925  
 name: MN-L-Sens-B2-ACpl-03

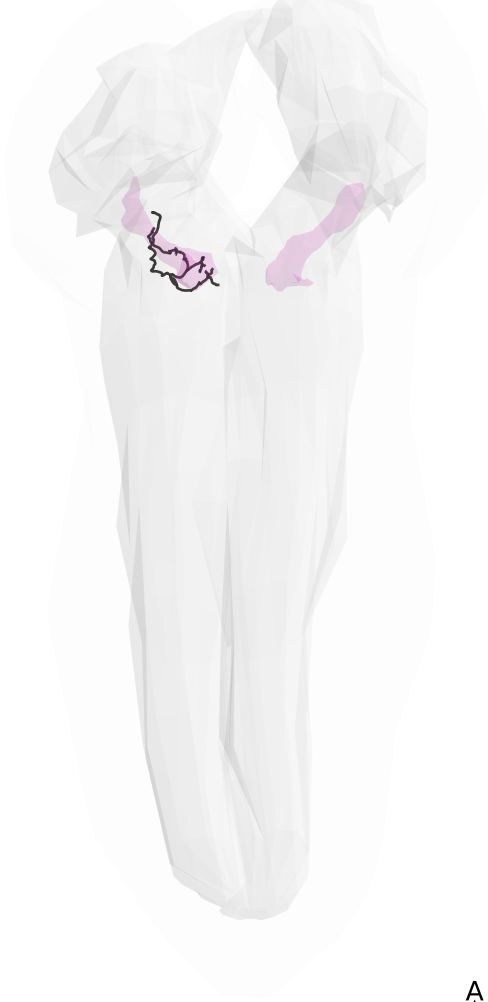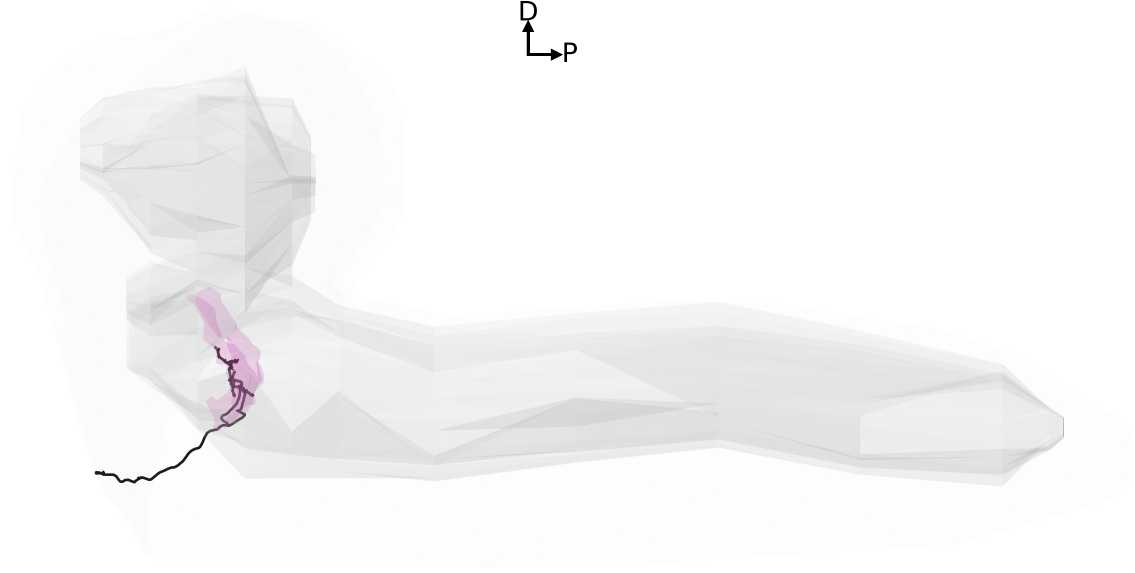

| <i>ID</i> | <i>name</i>          | SCACa | SCAVa | SCAVp | SCACal | SCACp | SCACpl | SCVM | IPCs | DMS | DH44 | Se0ens | Se0ph | PMN LR | MN motor neurons | PaN motor neurons | olfactory PNs | gustatory PNs | multiglomerular PNs | unknown PNs | thermo PNs | visual PNs |
|-----------|----------------------|-------|-------|-------|--------|-------|--------|------|------|-----|------|--------|-------|--------|------------------|-------------------|---------------|---------------|---------------------|-------------|------------|------------|
| 15673925  | MN-L-Sens-B2-ACpl-03 | 0     | 0     | 0     | 0      | 0     | 2      | 1    | 0    | 0   | 0    | 0      | 0     | 0      | 0                | 0                 | 0             | 0             | 0                   | 0           | 0          | 0          |









ID: 15595950  
 name: MN-R-Sens-B2-ACpl-01

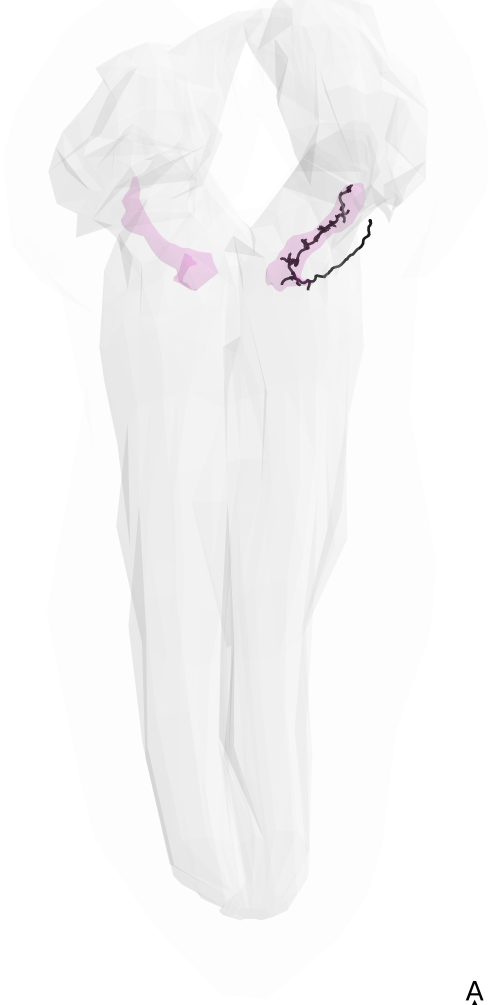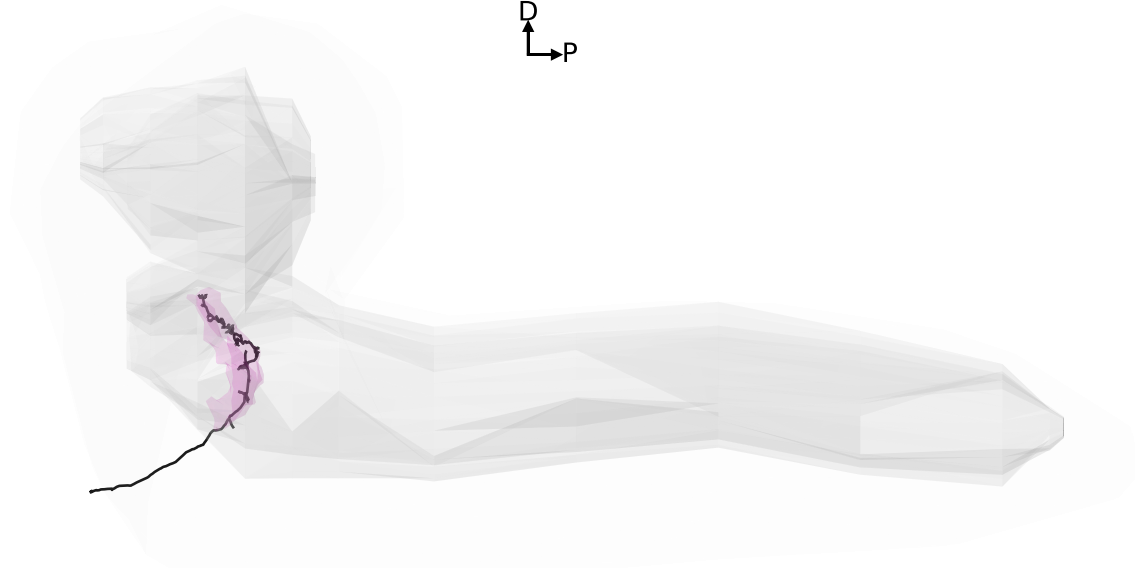

| <i>ID</i> | <i>name</i>          | SCACa | SCAVa | SCAVp | SCACal | SCACp | SCACpl | SCVM | IPCs | DMS | DH44 | Se0ens | Se0ph | PMN LR | MN motor neurons | PaN motor neurons | olfactory PNs | gustatory PNs | multiglomerular PNs | unknown PNs | thermo PNs | visual PNs |
|-----------|----------------------|-------|-------|-------|--------|-------|--------|------|------|-----|------|--------|-------|--------|------------------|-------------------|---------------|---------------|---------------------|-------------|------------|------------|
| 15595950  | MN-R-Sens-B2-ACpl-01 | 0     | 0     | 0     | 0      | 0     | 1      | 1    | 0    | 0   | 0    | 0      | 0     | 0      | 0                | 0                 | 0             | 0             | 27                  | 0           | 0          | 0          |



ID: 15615776  
 name: MN-R-Sens-B2-ACpl-03

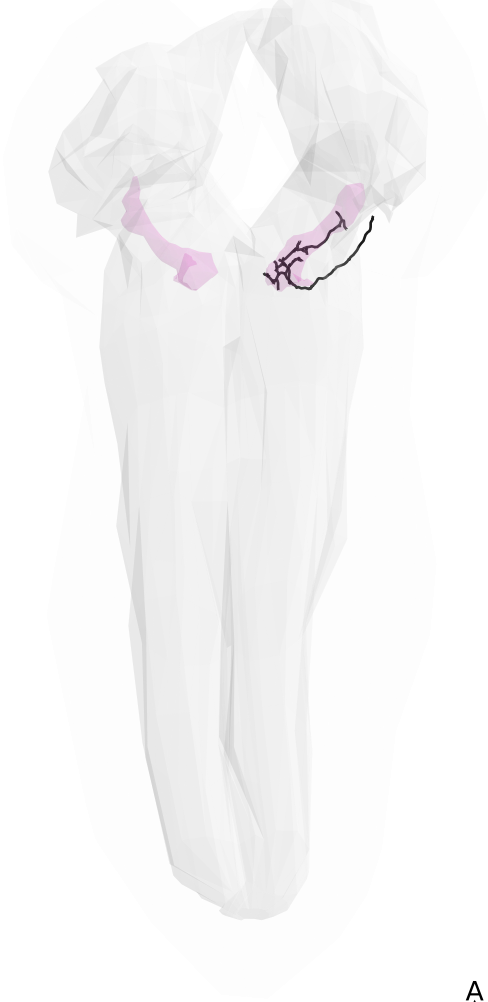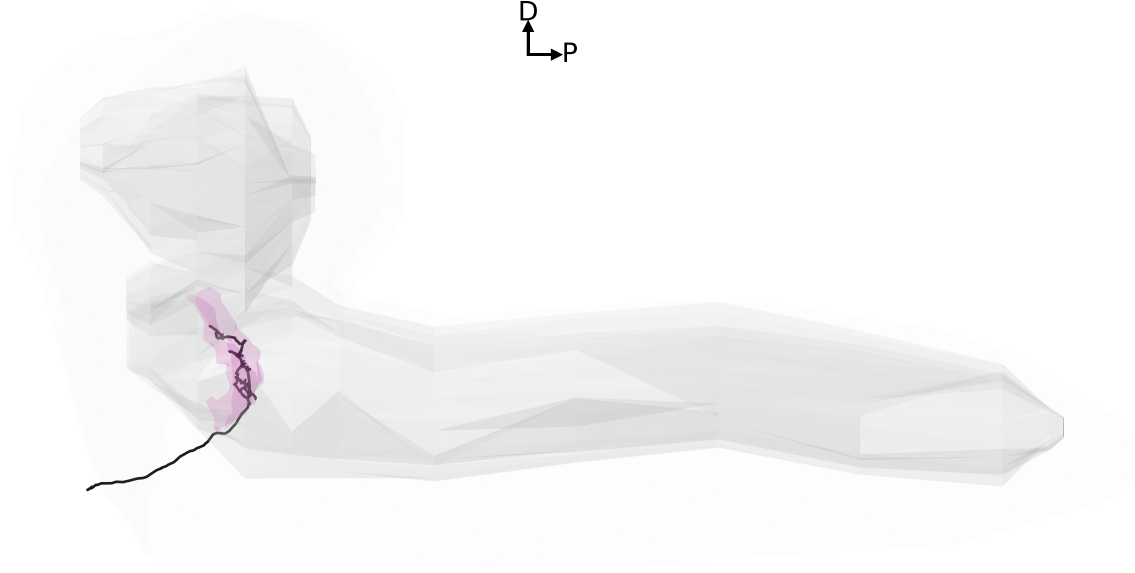

| <i>ID</i> | <i>name</i>          | SCACa | SCAVa | SCAVp | SCACal | SCACp | SCACpl | SCVM | IPCs | DMS | DH44 | Se0ens | Se0ph | PMN LR | MN motor neurons | PaN motor neurons | olfactory PNs | gustatory PNs | multiglomerular PNs | unknown PNs | thermo PNs | visual PNs |
|-----------|----------------------|-------|-------|-------|--------|-------|--------|------|------|-----|------|--------|-------|--------|------------------|-------------------|---------------|---------------|---------------------|-------------|------------|------------|
| 15615776  | MN-R-Sens-B2-ACpl-03 | 0     | 0     | 0     | 0      | 0     | 0      | 0    | 0    | 0   | 0    | 0      | 0     | 0      | 0                | 0                 | 0             | 0             | 1                   | 0           | 0          | 0          |

ID: 3123905

name: MN-R-Sens-B3-ACpl-07

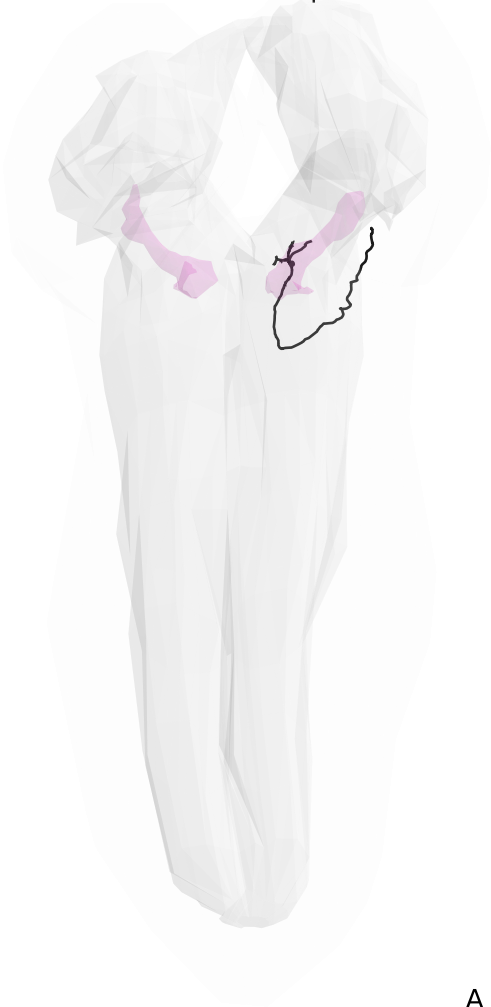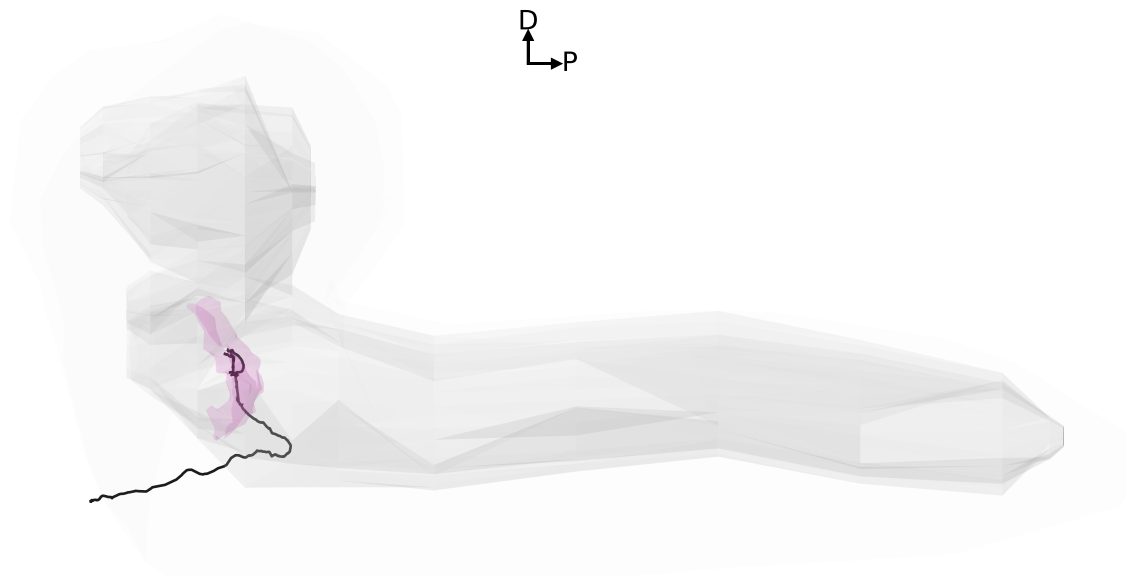

| <i>ID</i> | <i>name</i>          | SCACa | SCAVa | SCAVp | SCACal | SCACp | SCACpl | SCVM | IPCs | DMS | DH44 | Se0ens | Se0ph | PMN LR | MN motor neurons | PaN motor neurons | olfactory PNs | gustatory PNs | multiglomerular PNs | unknown PNs | thermo PNs | visual PNs |
|-----------|----------------------|-------|-------|-------|--------|-------|--------|------|------|-----|------|--------|-------|--------|------------------|-------------------|---------------|---------------|---------------------|-------------|------------|------------|
| 3123905   | MN-R-Sens-B3-ACpl-07 | 0     | 0     | 0     | 0      | 0     | 0      | 0    | 0    | 0   | 0    | 0      | 0     | 0      | 0                | 0                 | 0             | 0             | 2                   | 0           | 0          | 0          |

ID: 15998913

name: AN-L-Sens-B2-VM-04

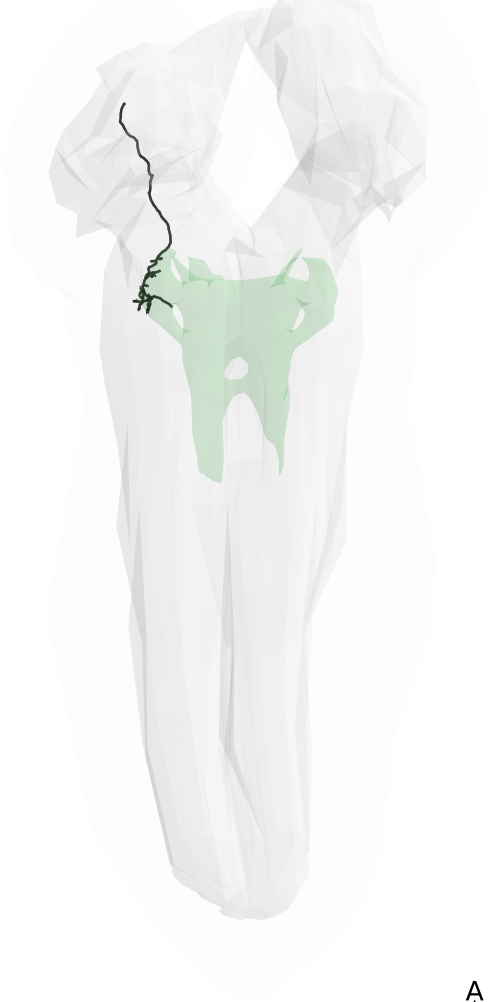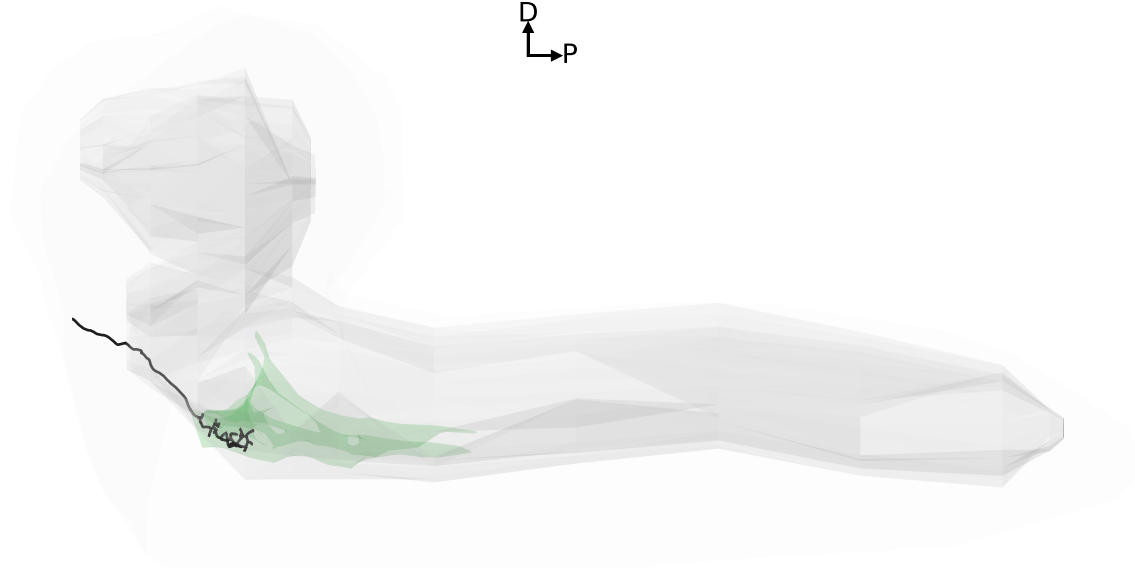

| <i>ID</i> | <i>name</i>        | SCACa | SCAVa | SCAVp | SCACal | SCACp | SCACpl | SCVM | IPCs | DMS | DH44 | Se0ens | Se0ph | PMN LR | MN motor neurons | PaN motor neurons | olfactory PNs | gustatory PNs | multiglomerular PNs | unknown PNs | thermo PNs | visual PNs |
|-----------|--------------------|-------|-------|-------|--------|-------|--------|------|------|-----|------|--------|-------|--------|------------------|-------------------|---------------|---------------|---------------------|-------------|------------|------------|
| 15998913  | AN-L-Sens-B2-VM-04 | 0     | 0     | 0     | 0      | 0     | 0      | 0    | 0    | 0   | 0    | 0      | 0     | 0      | 5                | 2                 | 0             | 0             | 0                   | 0           | 0          | 0          |

ID: 15998319

name: AN-L-Sens-B2-VM-05

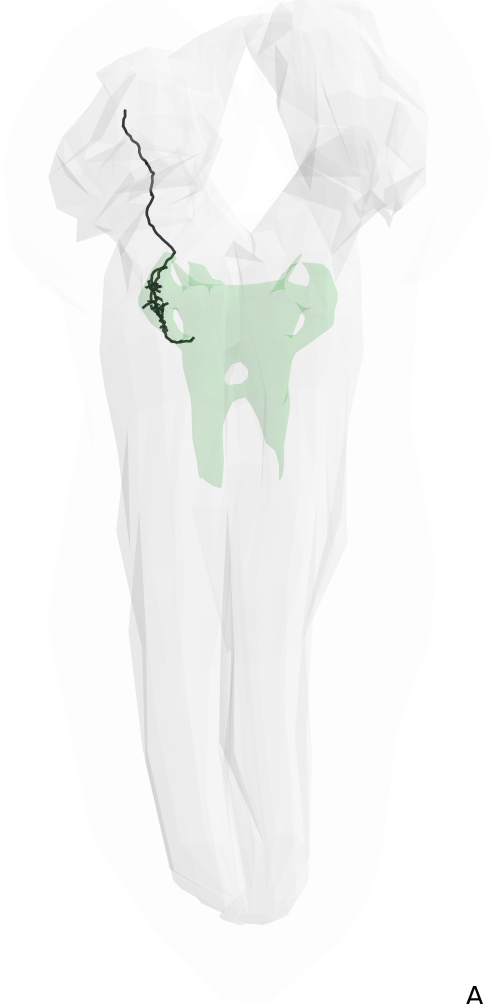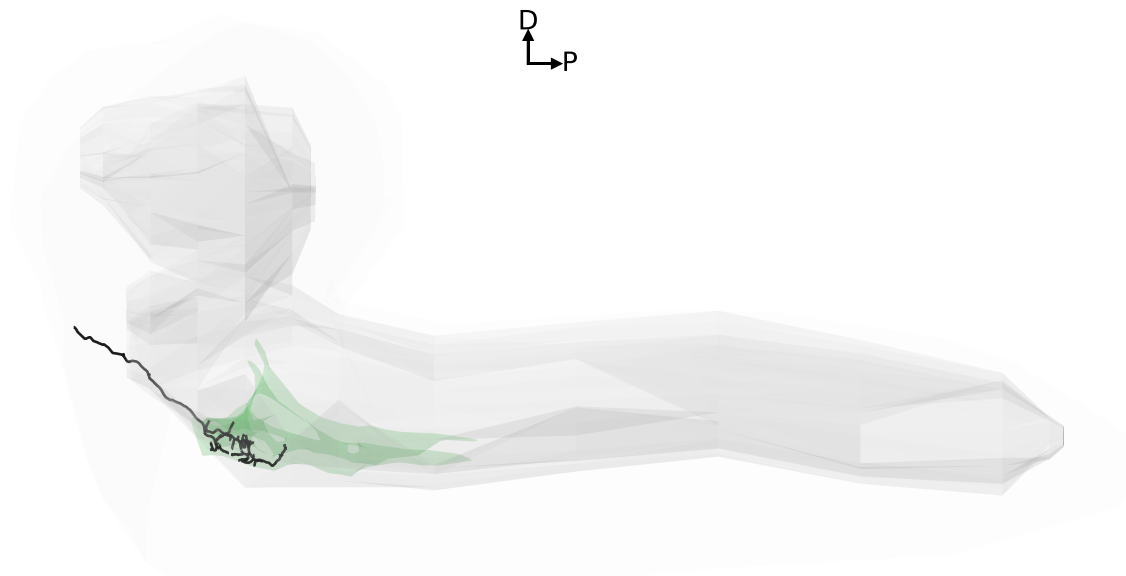

| <i>ID</i> | <i>name</i>        | SCACa | SCAVa | SCAVp | SCACal | SCACp | SCACpl | SCVM | IPCs | DMS | DH44 | Se0ens | Se0ph | PMN LR | MN motor neurons | PaN motor neurons | olfactory PNs | gustatory PNs | multiglomerular PNs | unknown PNs | thermo PNs | visual PNs |
|-----------|--------------------|-------|-------|-------|--------|-------|--------|------|------|-----|------|--------|-------|--------|------------------|-------------------|---------------|---------------|---------------------|-------------|------------|------------|
| 15998319  | AN-L-Sens-B2-VM-05 | 0     | 0     | 0     | 0      | 0     | 0      | 0    | 0    | 0   | 0    | 0      | 0     | 0      | 4                | 0                 | 0             | 0             | 0                   | 0           | 0          | 0          |









ID: 5057916  
 name: AN-L-Sens-B3-VM-11

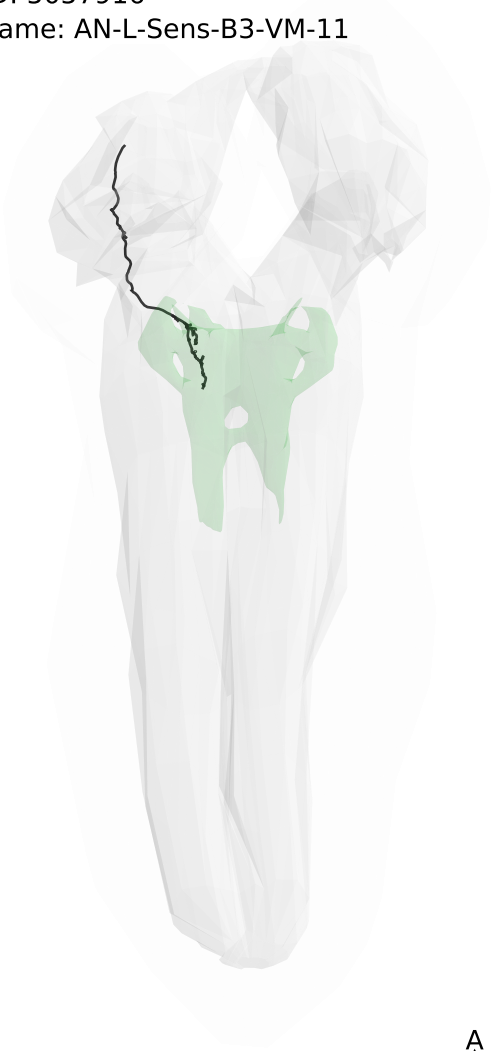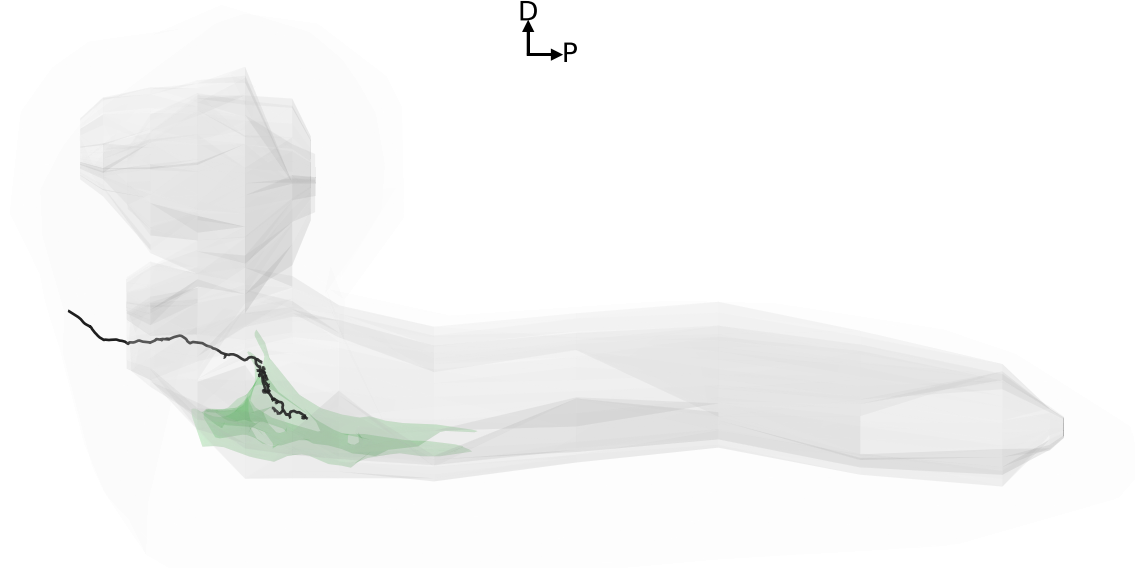

| <i>ID</i> | <i>name</i>        | SCACa | SCAVa | SCAVp | SCACal | SCACp | SCACpl | SCVM | IPCs | DMS | DH44 | Se0ens | Se0ph | PMN LR | MN motor neurons | PaN motor neurons | olfactory PNs | gustatory PNs | multiglomerular PNs | unknown PNs | thermo PNs | visual PNs |
|-----------|--------------------|-------|-------|-------|--------|-------|--------|------|------|-----|------|--------|-------|--------|------------------|-------------------|---------------|---------------|---------------------|-------------|------------|------------|
| 5057916   | AN-L-Sens-B3-VM-11 | 0     | 0     | 0     | 0      | 0     | 0      | 1    | 0    | 0   | 0    | 0      | 0     | 0      | 0                | 0                 | 0             | 0             | 0                   | 0           | 0          | 0          |



ID: 5120097  
 name: AN-L-Sens-B3-VM-12

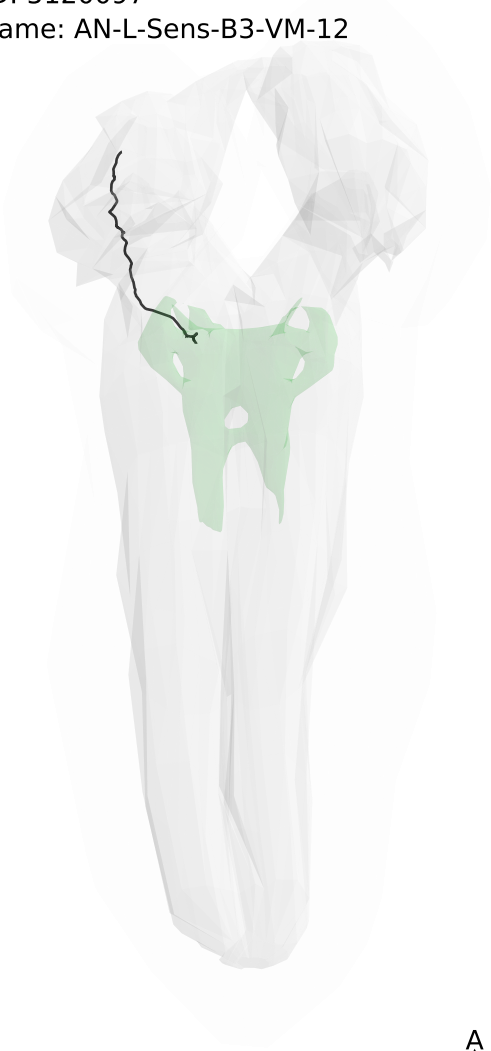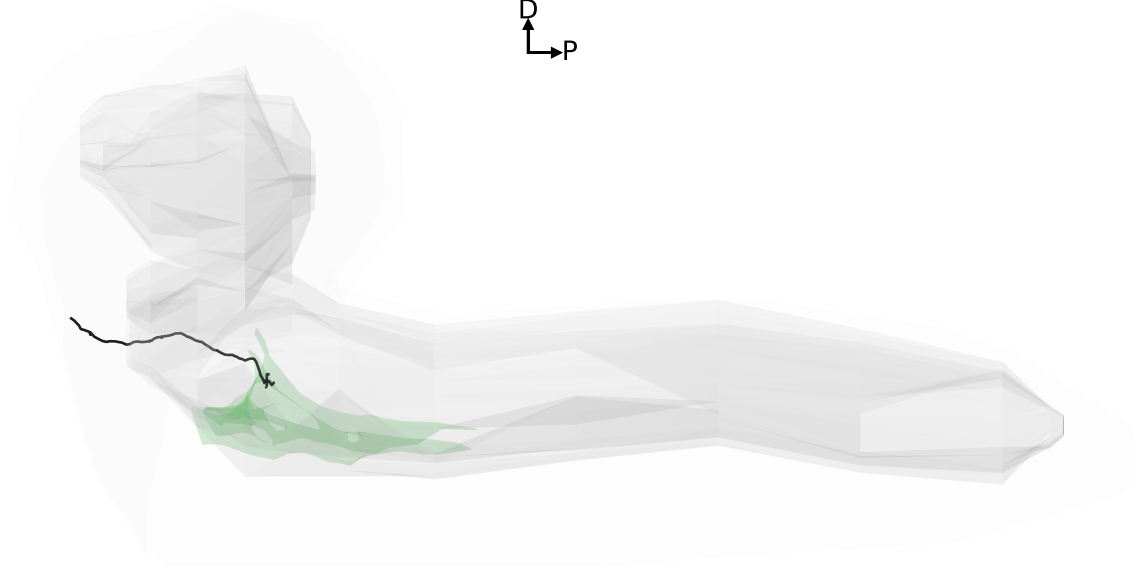

| <i>ID</i> | <i>name</i>        | SCACa | SCAVa | SCAVp | SCACal | SCACp | SCACpl | SCVM | IPCs | DMS | DH44 | Se0ens | Se0ph | PMN LR | MN motor neurons | PaN motor neurons | olfactory PNs | gustatory PNs | multiglomerular PNs | unknown PNs | thermo PNs | visual PNs |
|-----------|--------------------|-------|-------|-------|--------|-------|--------|------|------|-----|------|--------|-------|--------|------------------|-------------------|---------------|---------------|---------------------|-------------|------------|------------|
| 5120097   | AN-L-Sens-B3-VM-12 | 0     | 0     | 0     | 0      | 0     | 0      | 1    | 0    | 0   | 0    | 0      | 0     | 0      | 0                | 0                 | 0             | 0             | 0                   | 0           | 0          | 0          |



ID: 5120990  
 name: AN-L-Sens-B3-VM-13

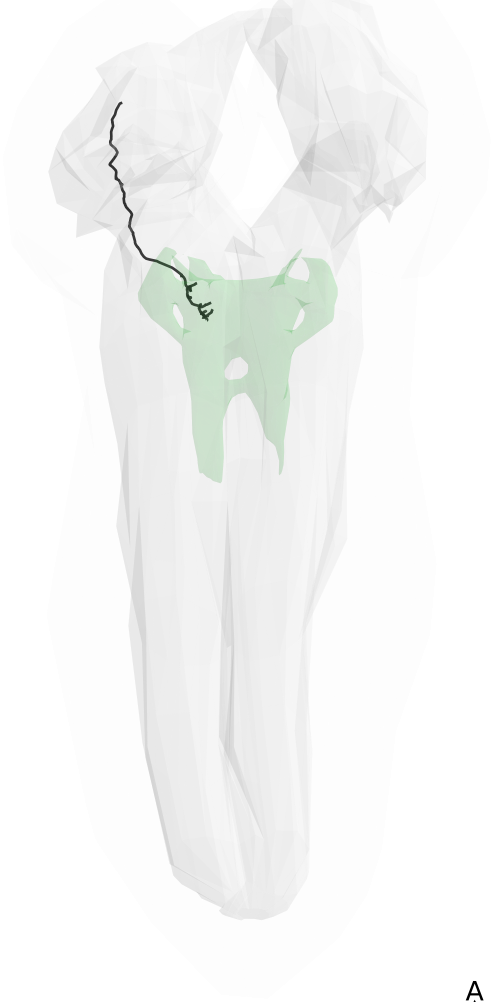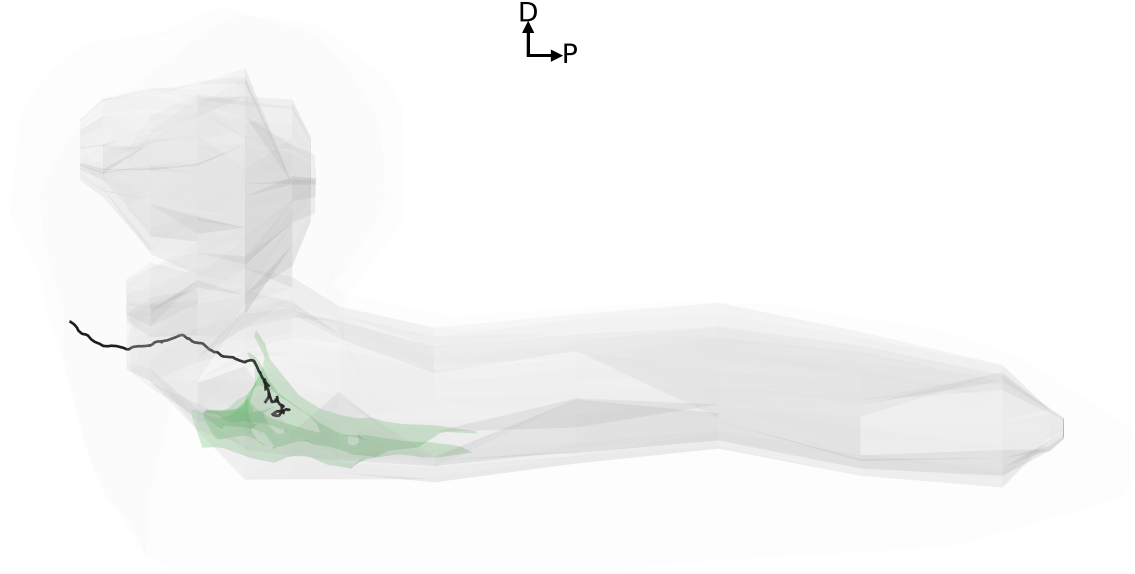

| <i>ID</i> | <i>name</i>        | SCACa | SCAVa | SCAVp | SCACal | SCACp | SCACpl | SCVM | IPCs | DMS | DH44 | Se0ens | Se0ph | PMN LR | MN motor neurons | PaN motor neurons | olfactory PNs | gustatory PNs | multiglomerular PNs | unknown PNs | thermo PNs | visual PNs |   |
|-----------|--------------------|-------|-------|-------|--------|-------|--------|------|------|-----|------|--------|-------|--------|------------------|-------------------|---------------|---------------|---------------------|-------------|------------|------------|---|
| 5120990   | AN-L-Sens-B3-VM-13 | 0     | 0     | 0     | 0      | 0     | 0      | 0    | 0    | 0   | 0    | 0      | 0     | 0      | 0                | 0                 | 0             | 0             | 0                   | 0           | 0          | 0          | 0 |



ID: 5095269  
 name: AN-L-Sens-B3-VM-14

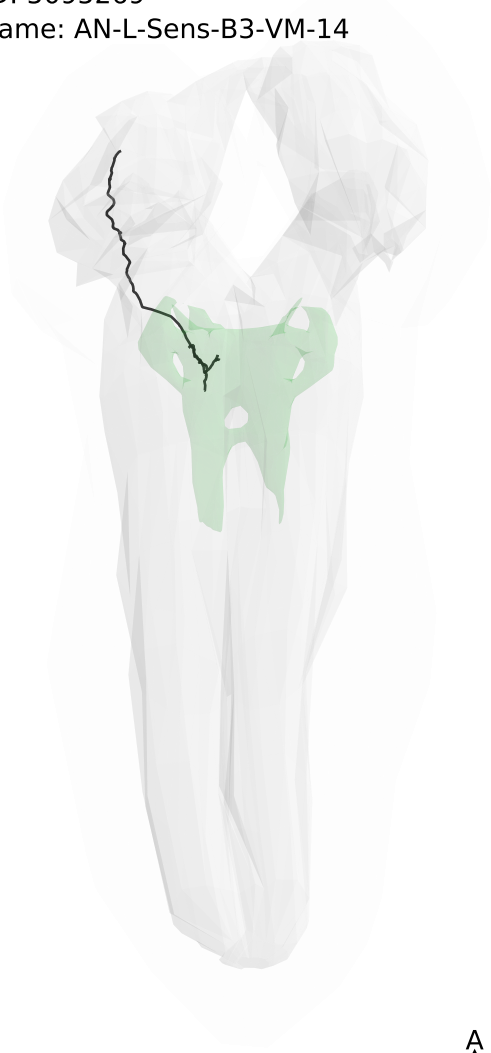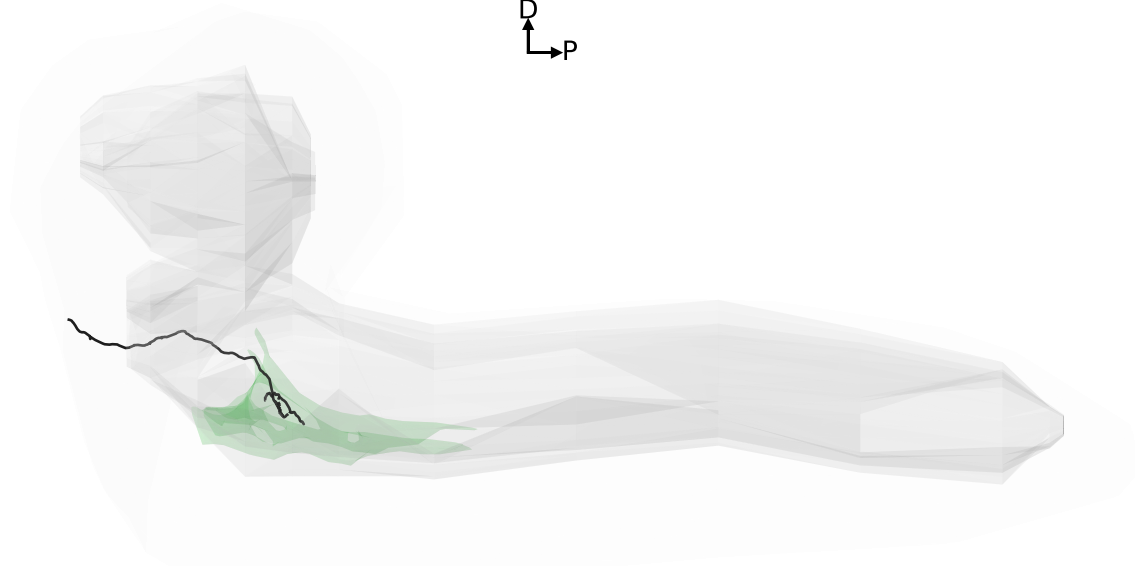

| <i>ID</i> | <i>name</i>        | SCACa | SCAVa | SCAVp | SCACal | SCACp | SCACpl | SCVM | IPCs | DMS | DH44 | Se0ens | Se0ph | PMN LR | MN motor neurons | PaN motor neurons | olfactory PNs | gustatory PNs | multiglomerular PNs | unknown PNs | thermo PNs | visual PNs |   |
|-----------|--------------------|-------|-------|-------|--------|-------|--------|------|------|-----|------|--------|-------|--------|------------------|-------------------|---------------|---------------|---------------------|-------------|------------|------------|---|
| 5095269   | AN-L-Sens-B3-VM-14 | 0     | 0     | 0     | 0      | 0     | 0      | 2    | 0    | 0   | 0    | 0      | 0     | 0      | 0                | 0                 | 0             | 0             | 0                   | 0           | 0          | 0          | 0 |







ID: 15508475  
 name: AN-R-Sens-B2-VM-04

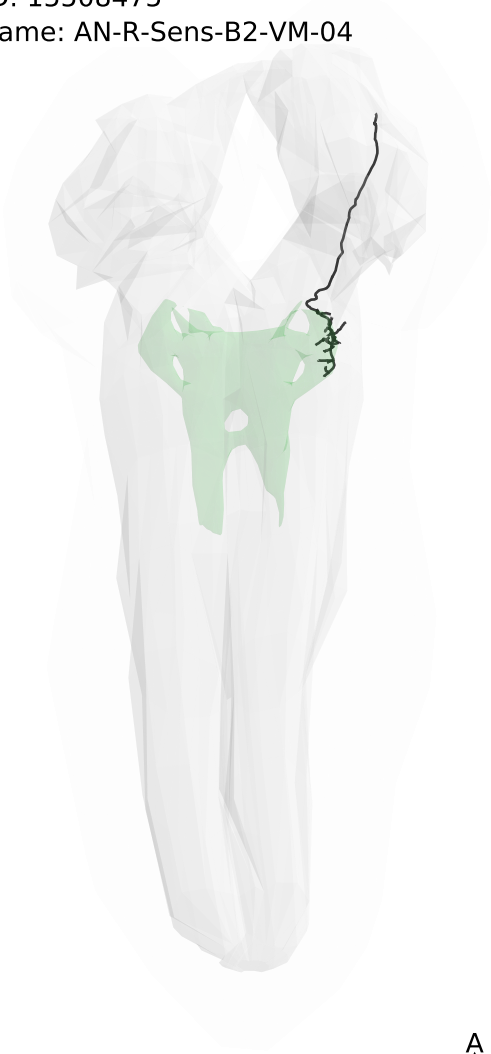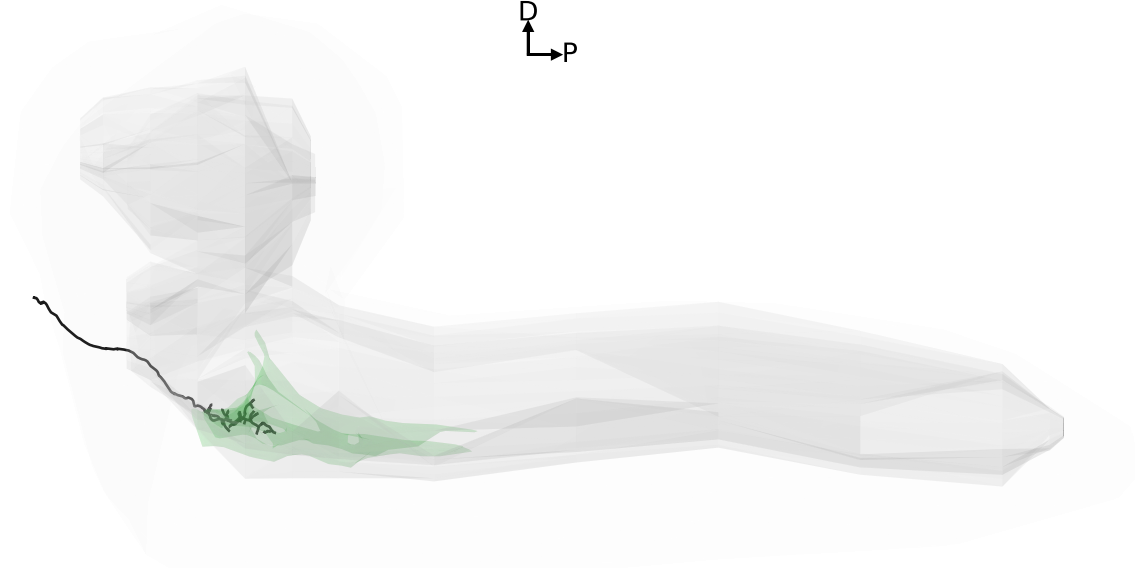

| <i>ID</i> | <i>name</i>        | SCACa | SCAVa | SCAVp | SCACal | SCACp | SCACpl | SCVM | IPCs | DMS | DH44 | Se0ens | Se0ph | PMN LR | MN motor neurons | PaN motor neurons | olfactory PNs | gustatory PNs | multiglomerular PNs | unknown PNs | thermo PNs | visual PNs |
|-----------|--------------------|-------|-------|-------|--------|-------|--------|------|------|-----|------|--------|-------|--------|------------------|-------------------|---------------|---------------|---------------------|-------------|------------|------------|
| 15508475  | AN-R-Sens-B2-VM-04 | 0     | 0     | 0     | 0      | 0     | 0      | 1    | 0    | 0   | 0    | 0      | 0     | 0      | 0                | 0                 | 0             | 0             | 0                   | 0           | 0          | 0          |



ID: 15594038  
 name: AN-R-Sens-B2-VM-05

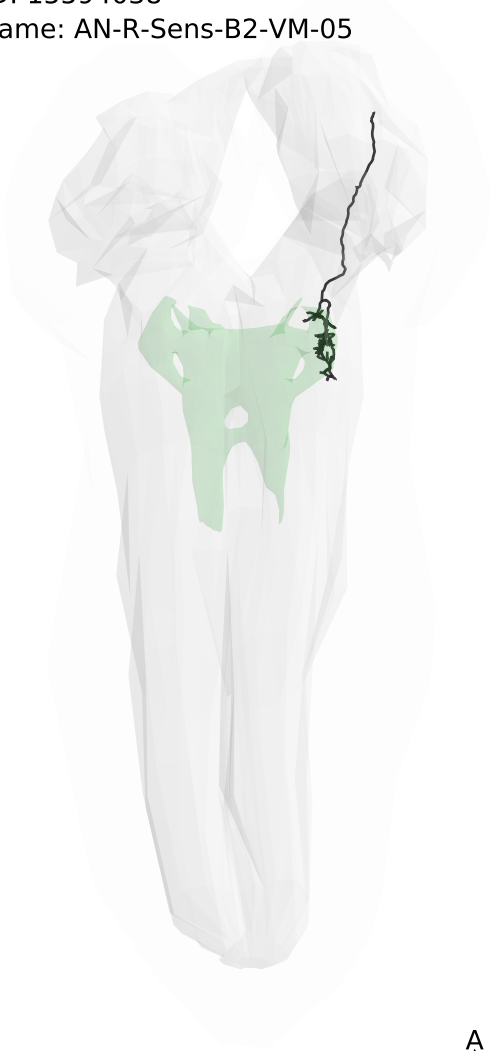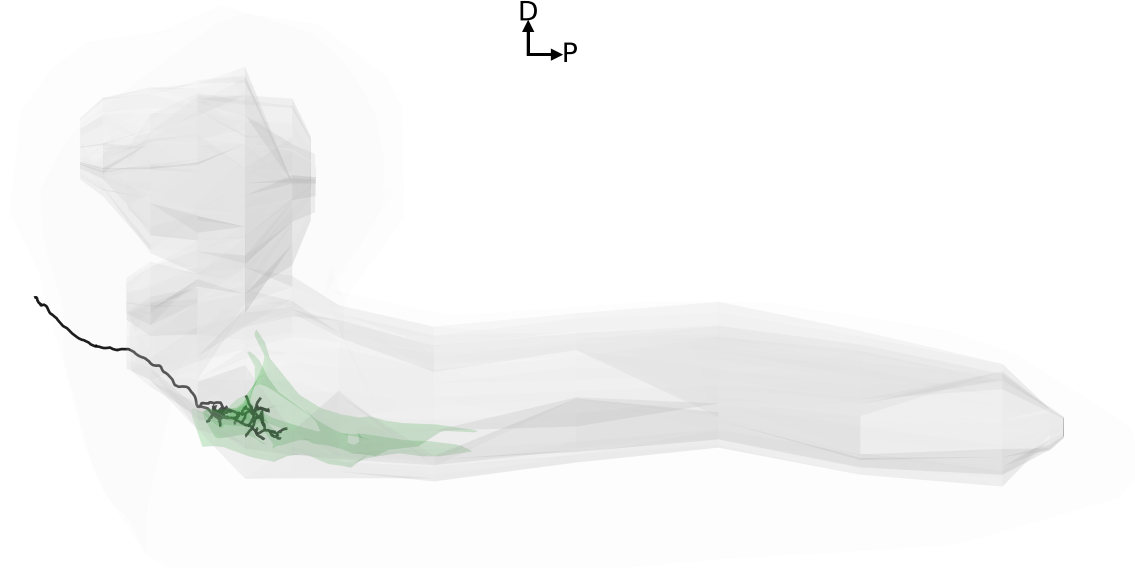

| <i>ID</i> | <i>name</i>        | SCACa | SCAVa | SCAVp | SCACal | SCACp | SCACpl | SCVM | IPCs | DMS | DH44 | Se0ens | Se0ph | PMN LR | MN motor neurons | PaN motor neurons | olfactory PNs | gustatory PNs | multiglomerular PNs | unknown PNs | thermo PNs | visual PNs |
|-----------|--------------------|-------|-------|-------|--------|-------|--------|------|------|-----|------|--------|-------|--------|------------------|-------------------|---------------|---------------|---------------------|-------------|------------|------------|
| 15594038  | AN-R-Sens-B2-VM-05 | 0     | 0     | 0     | 0      | 0     | 0      | 2    | 0    | 0   | 0    | 0      | 0     | 0      | 2                | 0                 | 0             | 0             | 0                   | 0           | 0          | 0          |





ID: 16115501  
 name: AN-R-Sens-B3-VM-11

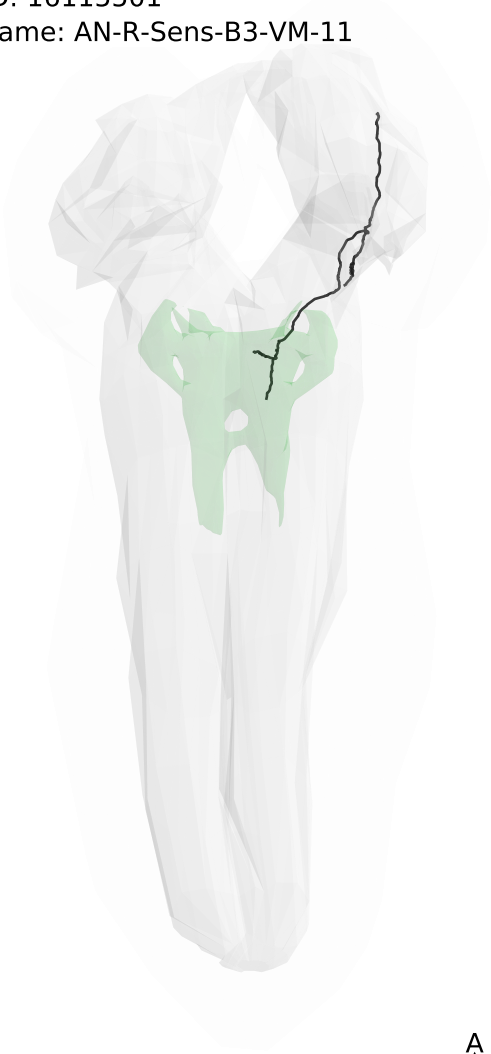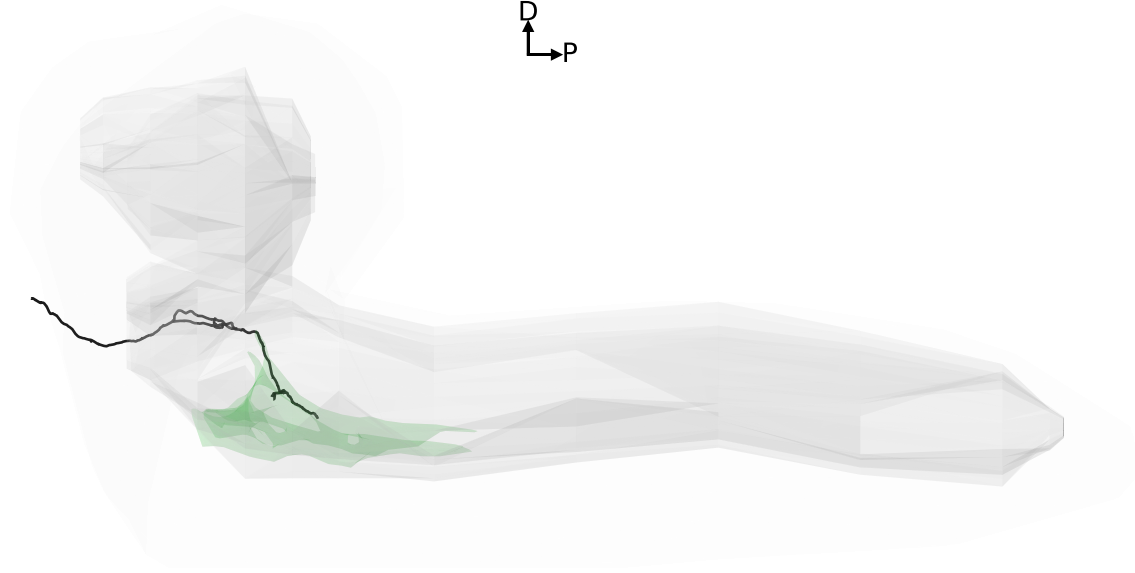

| <i>ID</i> | <i>name</i>        | SCACa | SCAVa | SCAVp | SCACal | SCACp | SCACpl | SCVM | IPCs | DMS | DH44 | Se0ens | Se0ph | PMN LR | MN motor neurons | PaN motor neurons | olfactory PNs | gustatory PNs | multiglomerular PNs | unknown PNs | thermo PNs | visual PNs |
|-----------|--------------------|-------|-------|-------|--------|-------|--------|------|------|-----|------|--------|-------|--------|------------------|-------------------|---------------|---------------|---------------------|-------------|------------|------------|
| 16115501  | AN-R-Sens-B3-VM-11 | 0     | 0     | 0     | 0      | 0     | 0      | 3    | 0    | 0   | 0    | 0      | 0     | 0      | 0                | 0                 | 0             | 0             | 1                   | 0           | 0          | 0          |













ID: 15714330  
 name: MN-L-Sens-B1-VM-03

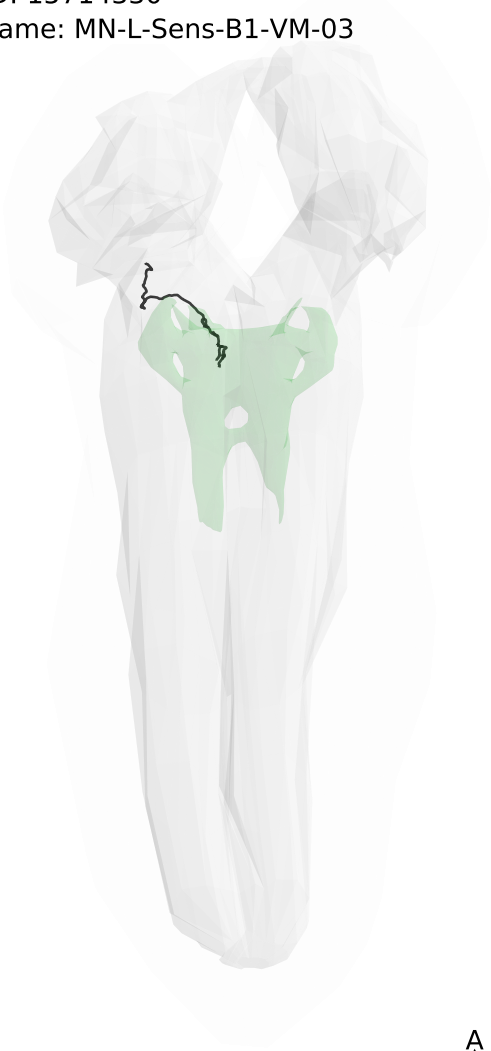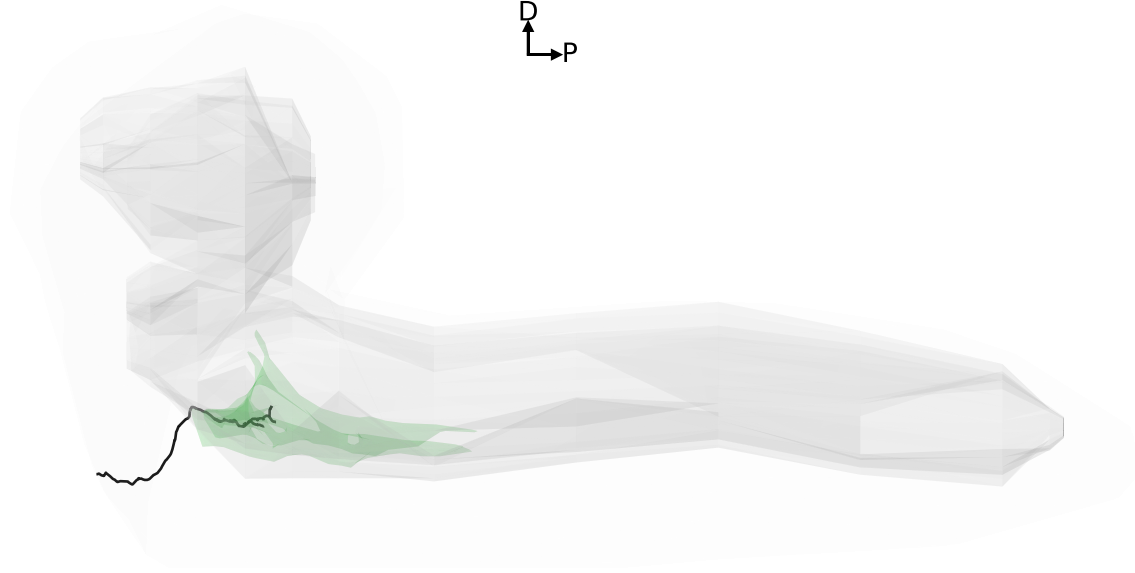

| <i>ID</i> | <i>name</i>        | SCACa | SCAVa | SCAVp | SCACal | SCACp | SCACpl | SCVM | IPCs | DMS | DH44 | Se0ens | Se0ph | PMN LR | MN motor neurons | PaN motor neurons | olfactory PNs | gustatory PNs | multiglomerular PNs | unknown PNs | thermo PNs | visual PNs |   |
|-----------|--------------------|-------|-------|-------|--------|-------|--------|------|------|-----|------|--------|-------|--------|------------------|-------------------|---------------|---------------|---------------------|-------------|------------|------------|---|
| 15714330  | MN-L-Sens-B1-VM-03 | 0     | 0     | 0     | 0      | 0     | 0      | 11   | 0    | 0   | 0    | 0      | 0     | 0      | 0                | 0                 | 0             | 0             | 0                   | 0           | 0          | 0          | 0 |









ID: 15674083  
 name: MN-L-Sens-B2-VM-02

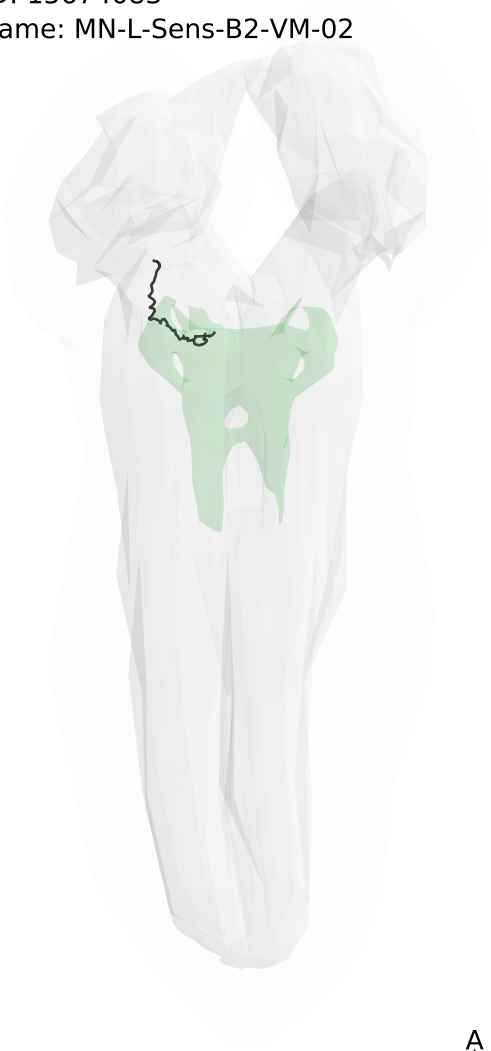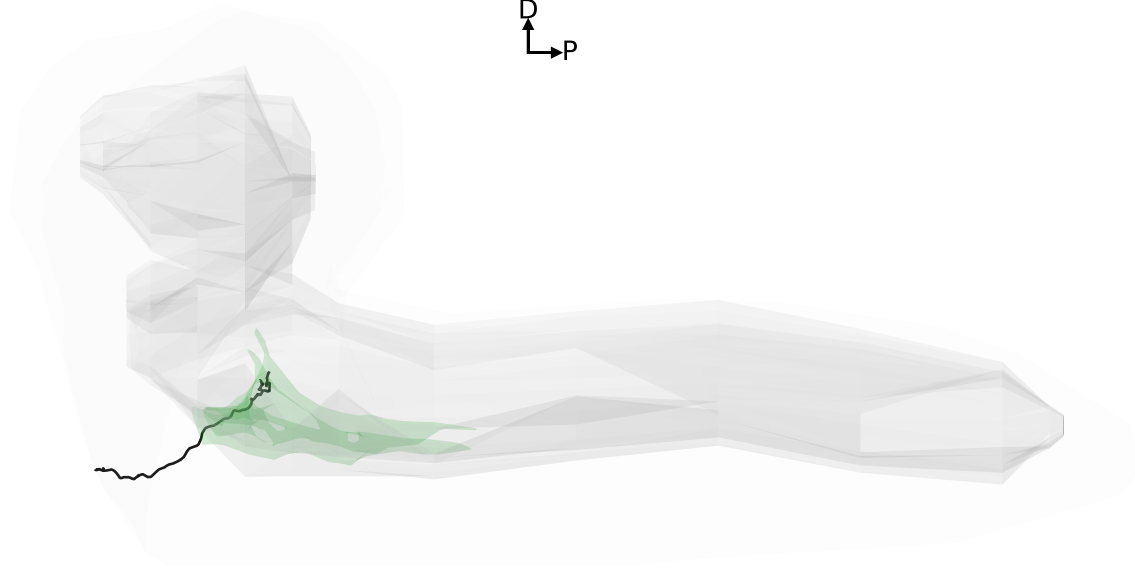

| <i>ID</i> | <i>name</i>        | SCACa | SCAVa | SCAVp | SCACal | SCACp | SCACpl | SCVM | IPCs | DMS | DH44 | Se0ens | Se0ph | PMN LR | MN motor neurons | PaN motor neurons | olfactory PNs | gustatory PNs | multiglomerular PNs | unknown PNs | thermo PNs | visual PNs |   |
|-----------|--------------------|-------|-------|-------|--------|-------|--------|------|------|-----|------|--------|-------|--------|------------------|-------------------|---------------|---------------|---------------------|-------------|------------|------------|---|
| 15674083  | MN-L-Sens-B2-VM-02 | 0     | 0     | 0     | 0      | 0     | 0      | 4    | 0    | 0   | 0    | 0      | 0     | 0      | 0                | 0                 | 0             | 0             | 0                   | 0           | 0          | 0          | 0 |

















ID: 15678441  
 name: MN-L-Sens-B2-VM-09

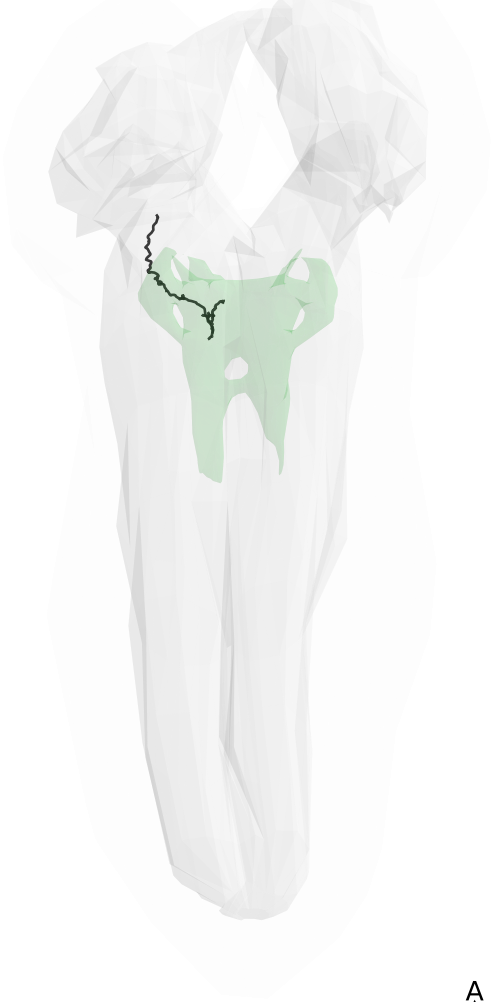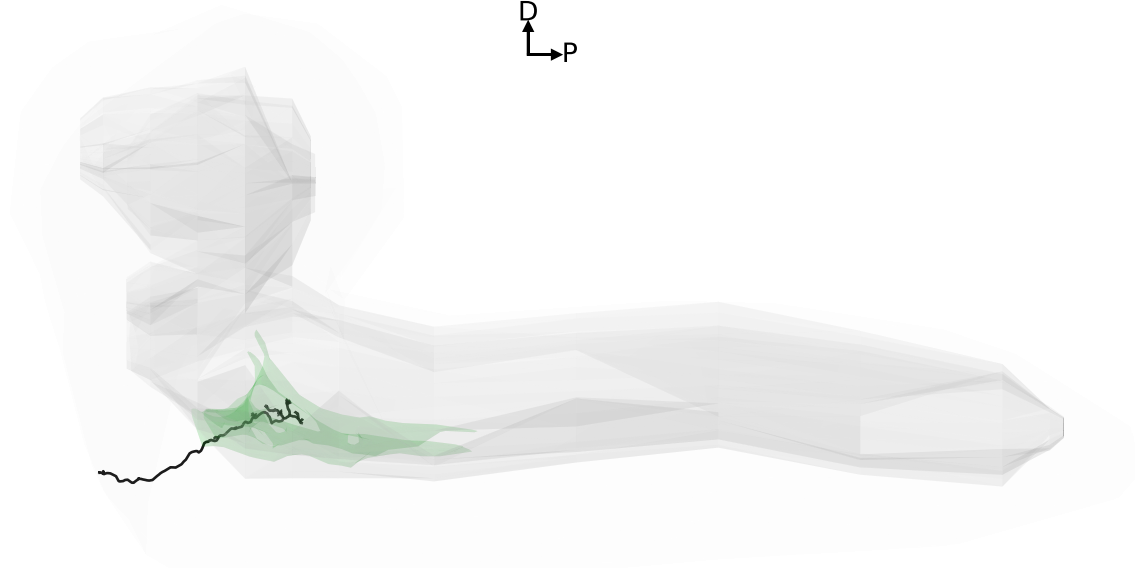

| <i>ID</i> | <i>name</i>        | SCACa | SCAVa | SCAVp | SCACal | SCACp | SCACpl | SCVM | IPCs | DMS | DH44 | Se0ens | Se0ph | PMN LR | MN motor neurons | PaN motor neurons | olfactory PNs | gustatory PNs | multiglomerular PNs | unknown PNs | thermo PNs | visual PNs |   |
|-----------|--------------------|-------|-------|-------|--------|-------|--------|------|------|-----|------|--------|-------|--------|------------------|-------------------|---------------|---------------|---------------------|-------------|------------|------------|---|
| 15678441  | MN-L-Sens-B2-VM-09 | 0     | 0     | 0     | 0      | 0     | 0      | 2    | 0    | 0   | 0    | 0      | 0     | 0      | 0                | 0                 | 0             | 0             | 0                   | 0           | 0          | 0          | 0 |



ID: 15714845  
 name: MN-L-Sens-B2-VM-10

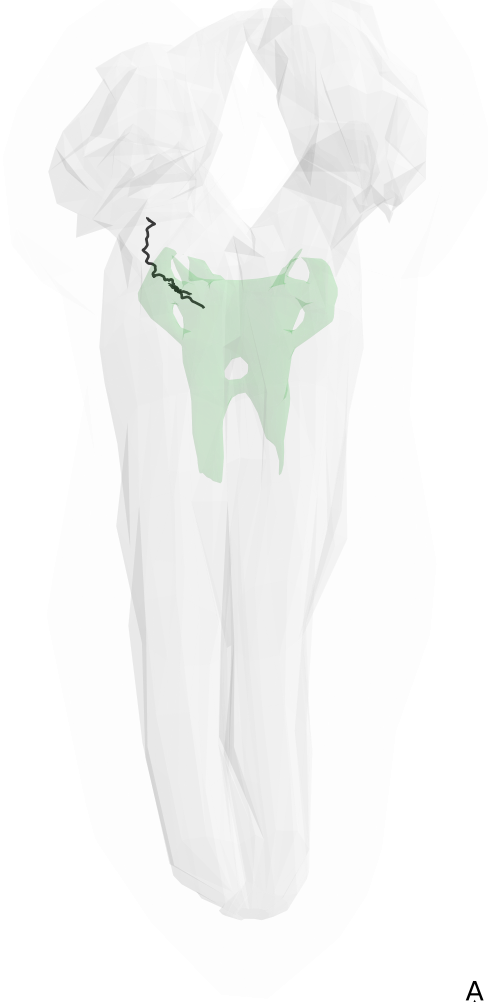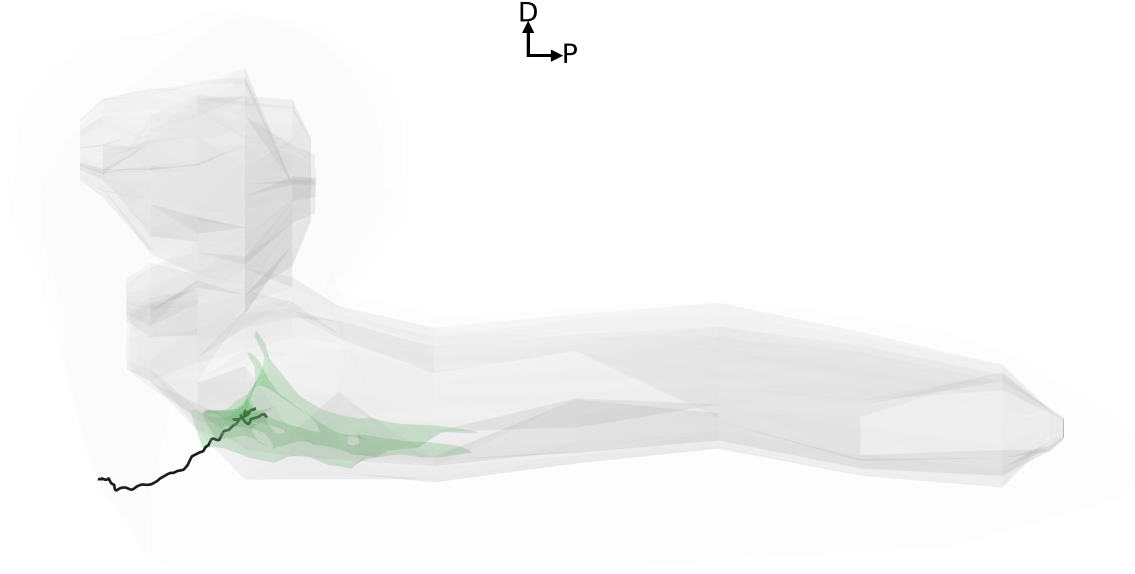

| <i>ID</i> | <i>name</i>        | SCACa | SCAVa | SCAVp | SCACal | SCACp | SCACpl | SCVM | IPCs | DMS | DH44 | Se0ens | Se0ph | PMN LR | MN motor neurons | PaN motor neurons | olfactory PNs | gustatory PNs | multiglomerular PNs | unknown PNs | thermo PNs | visual PNs |
|-----------|--------------------|-------|-------|-------|--------|-------|--------|------|------|-----|------|--------|-------|--------|------------------|-------------------|---------------|---------------|---------------------|-------------|------------|------------|
| 15714845  | MN-L-Sens-B2-VM-10 | 0     | 0     | 0     | 0      | 1     | 0      | 2    | 0    | 0   | 0    | 0      | 0     | 0      | 0                | 0                 | 0             | 0             | 0                   | 0           | 0          | 0          |

















ID: 15713374  
 name: MN-L-Sens-B2-VM-17

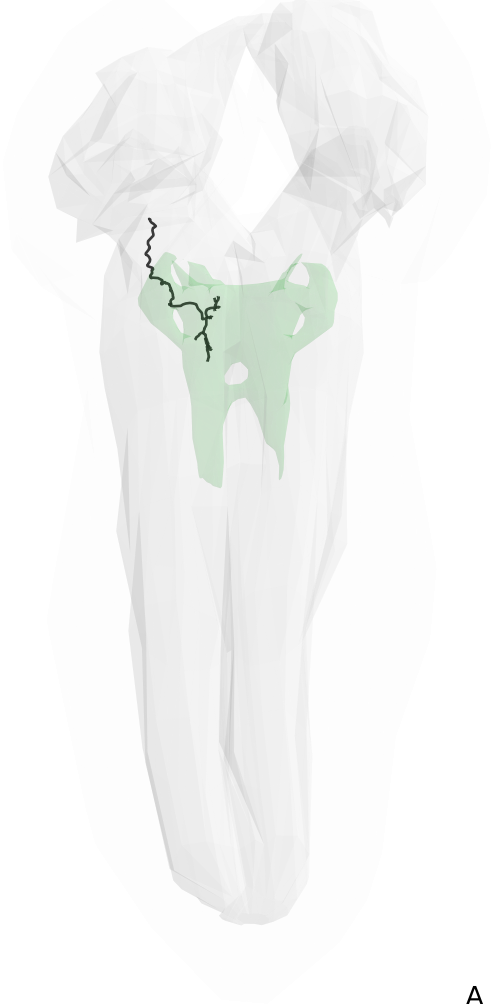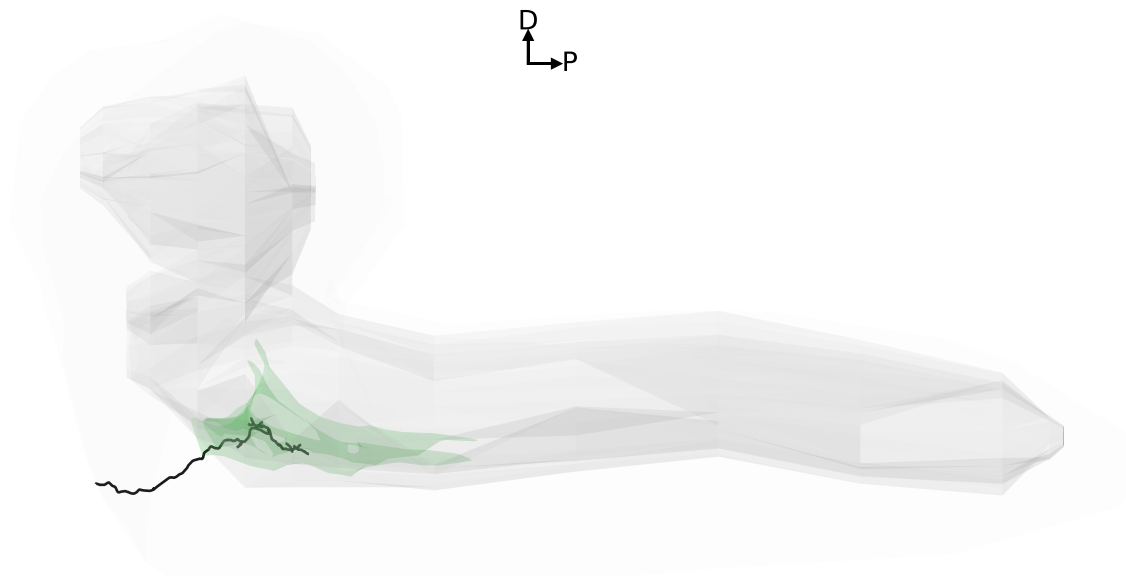

| <i>ID</i> | <i>name</i>        | SCACa | SCAVa | SCAVp | SCACal | SCACp | SCACpl | SCVM | IPCs | DMS | DH44 | Se0ens | Se0ph | PMN LR | MN motor neurons | PaN motor neurons | olfactory PNs | gustatory PNs | multiglomerular PNs | unknown PNs | thermo PNs | visual PNs |
|-----------|--------------------|-------|-------|-------|--------|-------|--------|------|------|-----|------|--------|-------|--------|------------------|-------------------|---------------|---------------|---------------------|-------------|------------|------------|
| 15713374  | MN-L-Sens-B2-VM-17 | 0     | 0     | 0     | 0      | 0     | 1      | 2    | 0    | 0   | 0    | 0      | 0     | 0      | 0                | 0                 | 0             | 0             | 0                   | 0           | 0          | 0          |

















ID: 19180425  
 name: MN-L-Sens-B2-VM-24

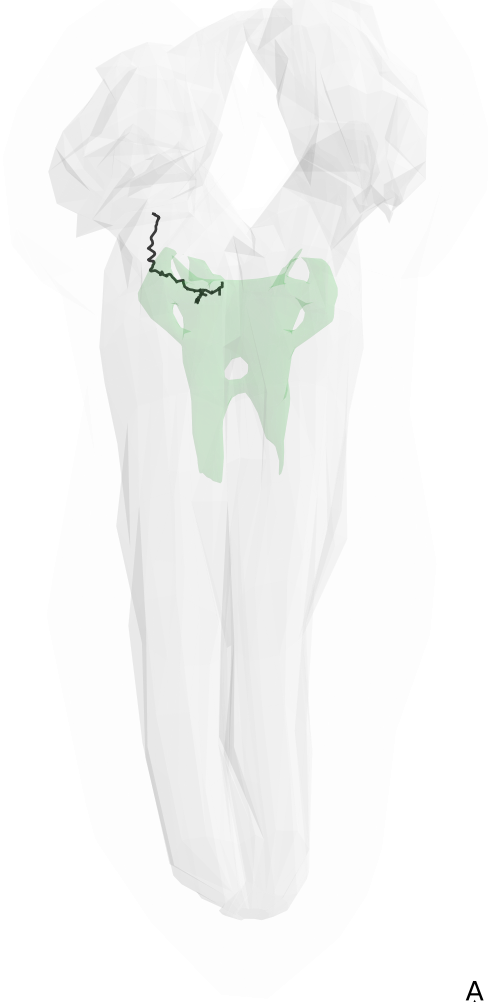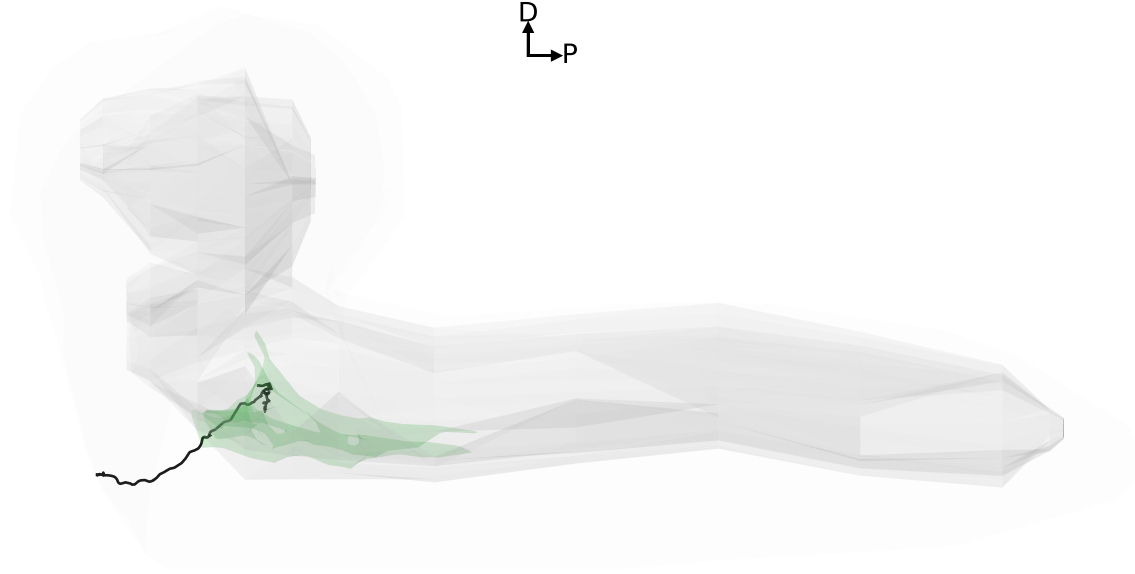

| <i>ID</i> | <i>name</i>        | SCACa | SCAVa | SCAVp | SCACal | SCACp | SCACpl | SCVM | IPCs | DMS | DH44 | Se0ens | Se0ph | PMN LR | MN motor neurons | PaN motor neurons | olfactory PNs | gustatory PNs | multiglomerular PNs | unknown PNs | thermo PNs | visual PNs |
|-----------|--------------------|-------|-------|-------|--------|-------|--------|------|------|-----|------|--------|-------|--------|------------------|-------------------|---------------|---------------|---------------------|-------------|------------|------------|
| 19180425  | MN-L-Sens-B2-VM-24 | 0     | 0     | 0     | 0      | 0     | 0      | 4    | 0    | 0   | 0    | 0      | 0     | 0      | 0                | 0                 | 0             | 0             | 0                   | 0           | 0          | 0          |



ID: 15727304  
 name: MN-L-Sens-B3-VM-04

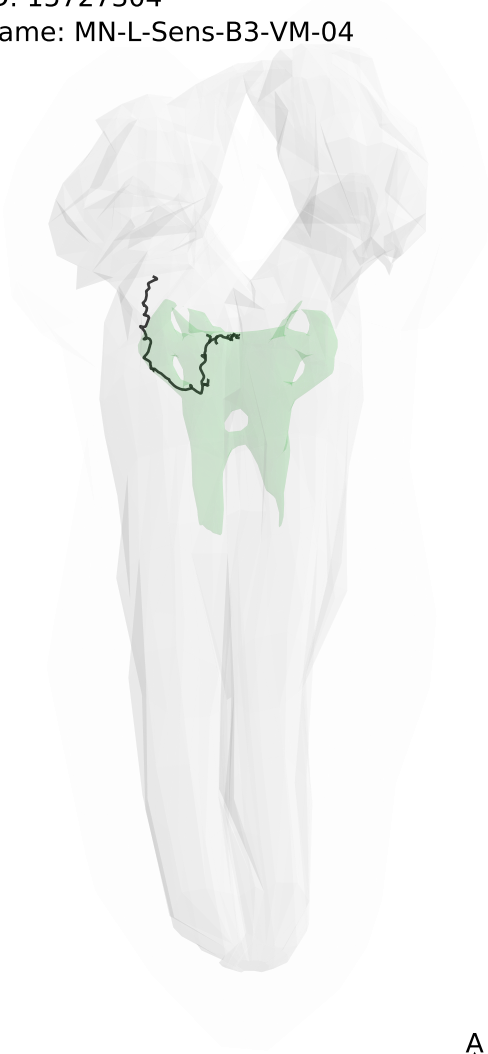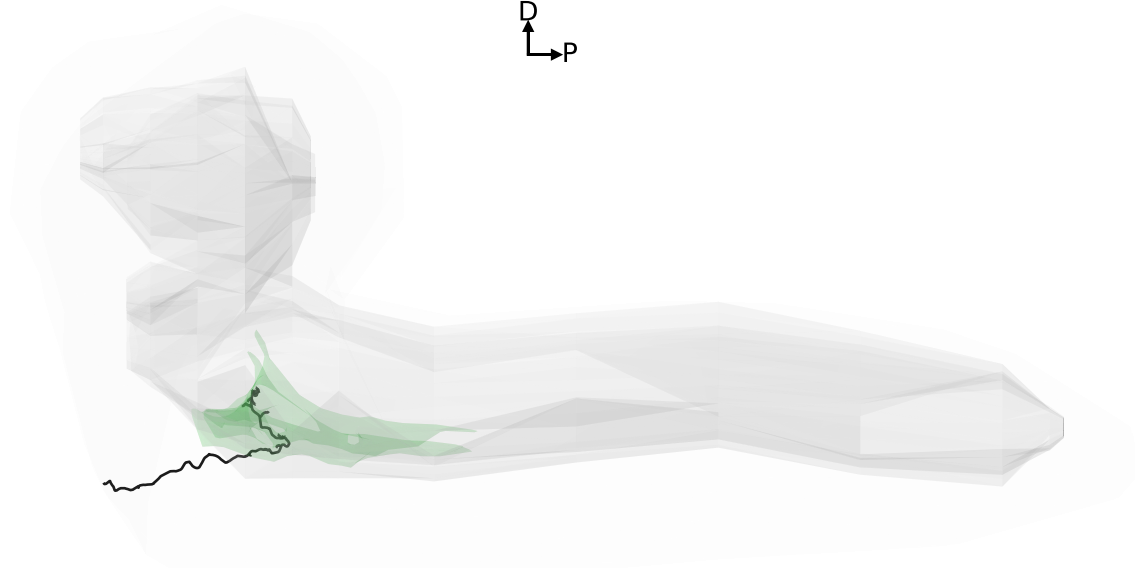

| <i>ID</i> | <i>name</i>        | SCACa | SCAVa | SCAVp | SCACal | SCACp | SCACpl | SCVM | IPCs | DMS | DH44 | Se0ens | Se0ph | PMN LR | MN motor neurons | PaN motor neurons | olfactory PNs | gustatory PNs | multiglomerular PNs | unknown PNs | thermo PNs | visual PNs |   |
|-----------|--------------------|-------|-------|-------|--------|-------|--------|------|------|-----|------|--------|-------|--------|------------------|-------------------|---------------|---------------|---------------------|-------------|------------|------------|---|
| 15727304  | MN-L-Sens-B3-VM-04 | 0     | 0     | 0     | 0      | 0     | 0      | 0    | 0    | 0   | 0    | 0      | 0     | 0      | 0                | 0                 | 0             | 0             | 0                   | 0           | 0          | 0          | 0 |





ID: 15724520  
 name: MN-L-Sens-B3-VM-06

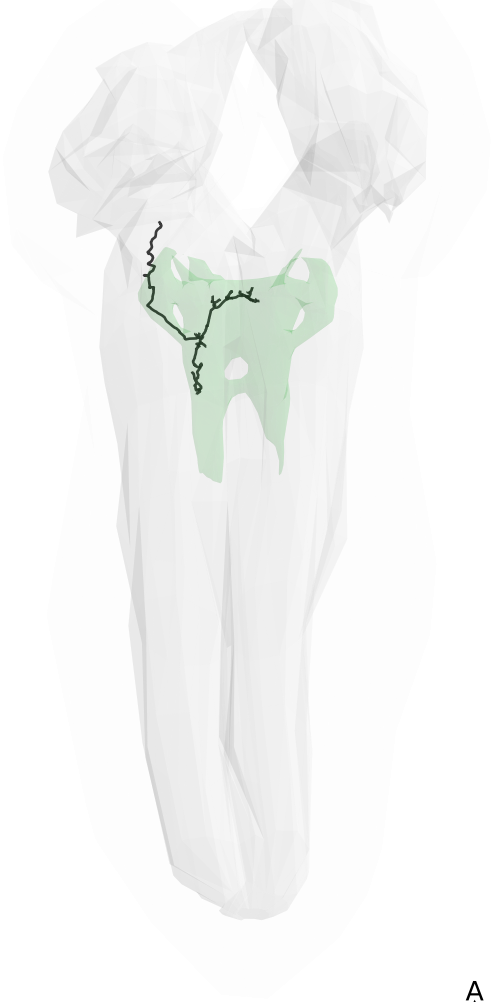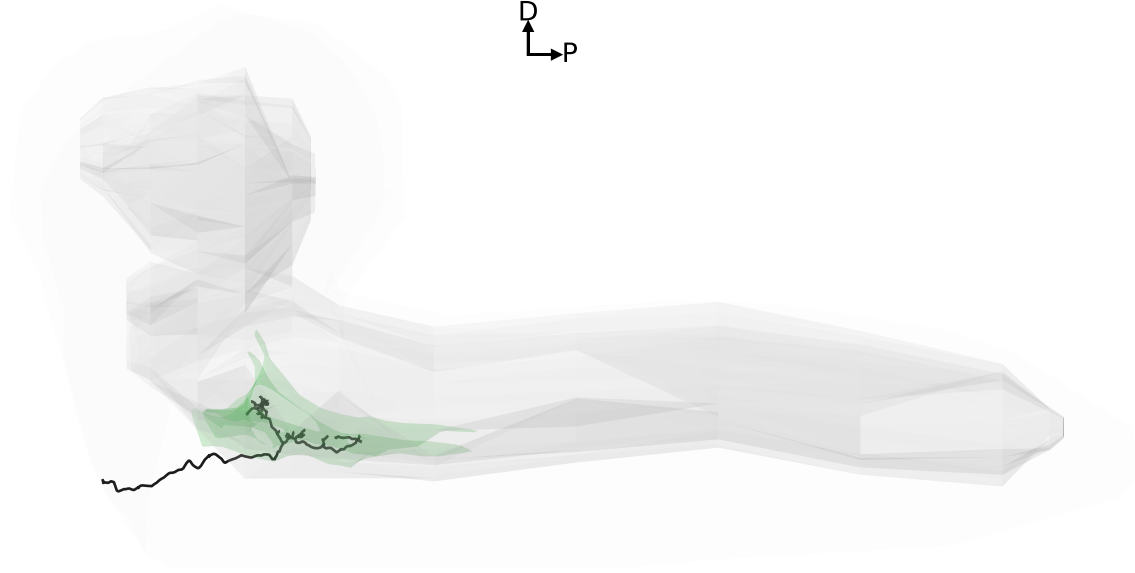

| <i>ID</i> | <i>name</i>        | SCACa | SCAVa | SCAVp | SCACal | SCACp | SCACpl | SCVM | IPCs | DMS | DH44 | Se0ens | Se0ph | PMN LR | MN motor neurons | PaN motor neurons | olfactory PNs | gustatory PNs | multiglomerular PNs | unknown PNs | thermo PNs | visual PNs |
|-----------|--------------------|-------|-------|-------|--------|-------|--------|------|------|-----|------|--------|-------|--------|------------------|-------------------|---------------|---------------|---------------------|-------------|------------|------------|
| 15724520  | MN-L-Sens-B3-VM-06 | 0     | 0     | 0     | 0      | 0     | 0      | 4    | 0    | 0   | 0    | 0      | 0     | 0      | 0                | 0                 | 0             | 0             | 0                   | 0           | 0          | 0          |















































ID: 15610387  
 name: MN-R-Sens-B2-VM-08

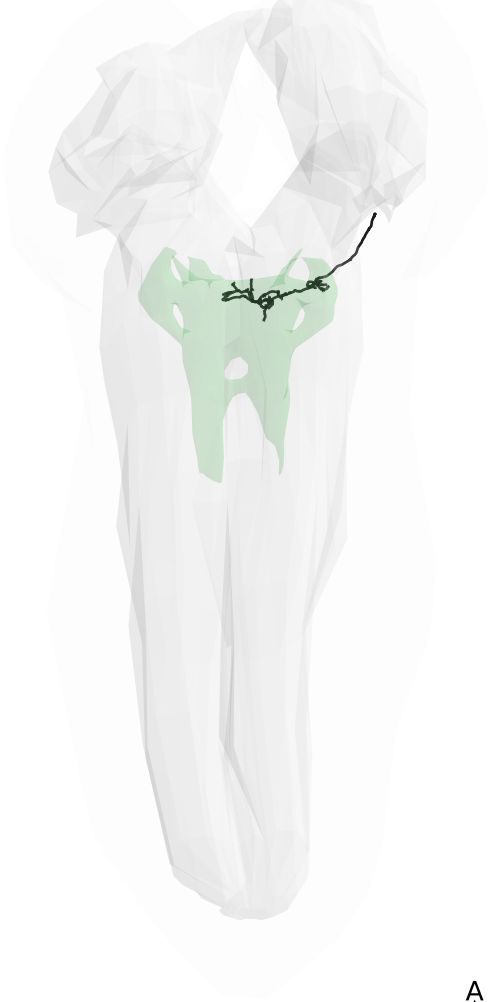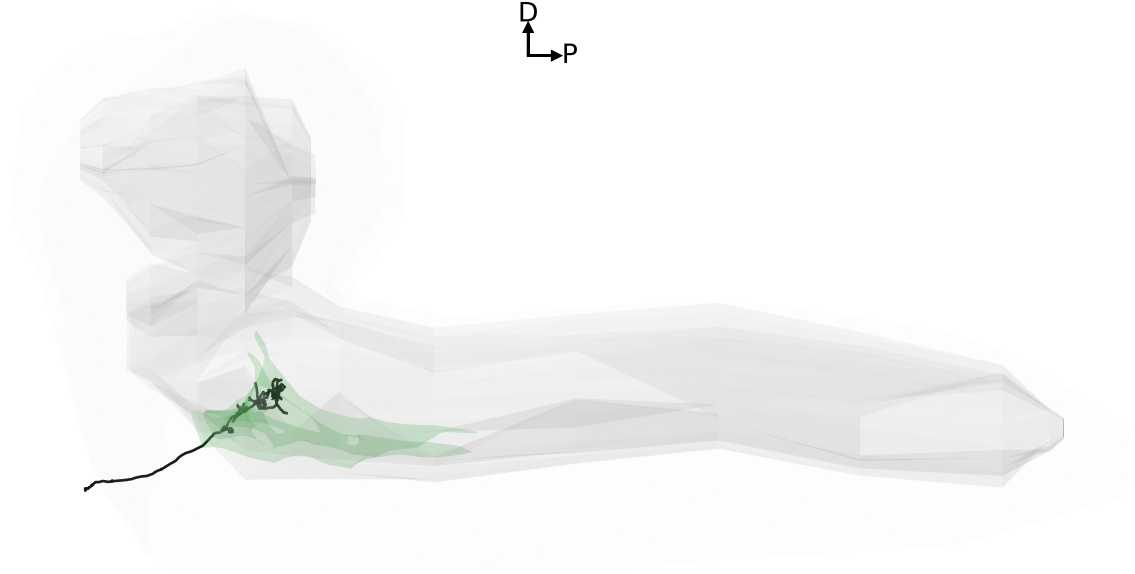

| <i>ID</i> | <i>name</i>        | SCACa | SCAVa | SCAVp | SCACal | SCACp | SCACpl | SCVM | IPCs | DMS | DH44 | Se0ens | Se0ph | PMN LR | MN motor neurons | PaN motor neurons | olfactory PNs | gustatory PNs | multiglomerular PNs | unknown PNs | thermo PNs | visual PNs |
|-----------|--------------------|-------|-------|-------|--------|-------|--------|------|------|-----|------|--------|-------|--------|------------------|-------------------|---------------|---------------|---------------------|-------------|------------|------------|
| 15610387  | MN-R-Sens-B2-VM-08 | 0     | 0     | 0     | 0      | 0     | 0      | 2    | 0    | 0   | 0    | 0      | 0     | 0      | 0                | 3                 | 0             | 0             | 0                   | 0           | 0          | 0          |























ID: 15612241  
 name: MN-R-Sens-B2-VM-19

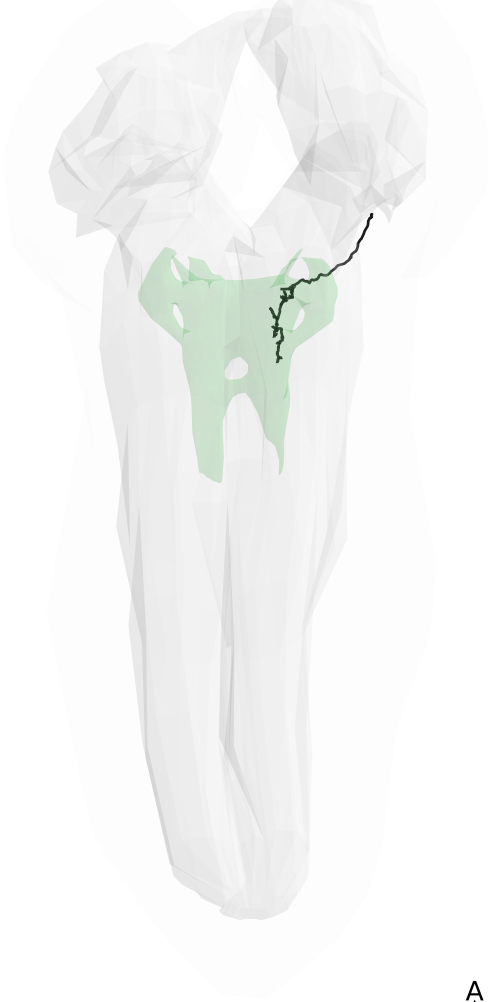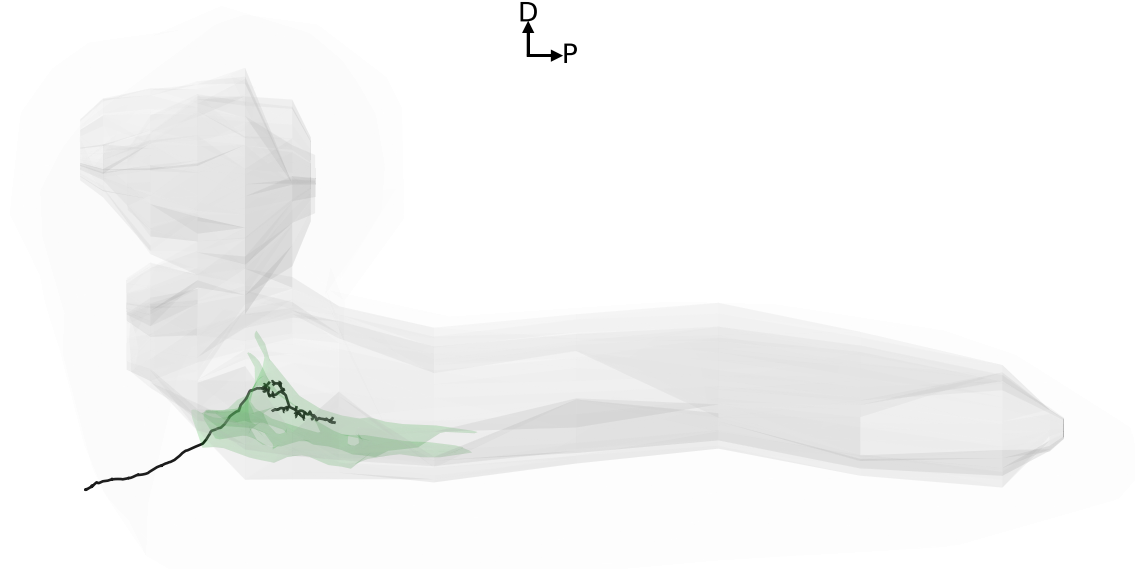

| <i>ID</i> | <i>name</i>        | SCACa | SCAVa | SCAVp | SCACal | SCACp | SCACpl | SCVM | IPCs | DMS | DH44 | Se0ens | Se0ph | PMN LR | MN motor neurons | PaN motor neurons | olfactory PNs | gustatory PNs | multiglomerular PNs | unknown PNs | thermo PNs | visual PNs |
|-----------|--------------------|-------|-------|-------|--------|-------|--------|------|------|-----|------|--------|-------|--------|------------------|-------------------|---------------|---------------|---------------------|-------------|------------|------------|
| 15612241  | MN-R-Sens-B2-VM-19 | 0     | 0     | 0     | 0      | 0     | 0      | 9    | 0    | 0   | 0    | 0      | 0     | 0      | 0                | 0                 | 0             | 0             | 0                   | 0           | 0          | 0          |





























ID: 15640724  
 name: MN-R-Sens-B3-VM-11

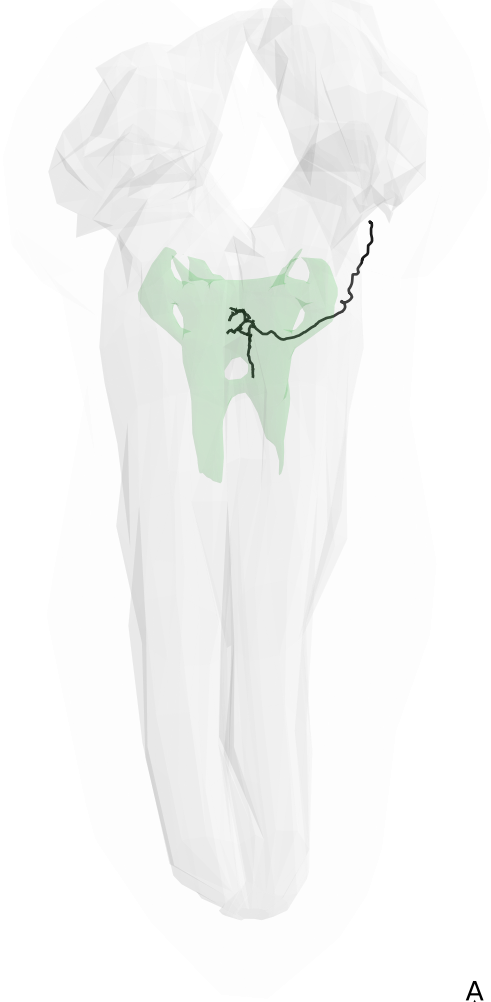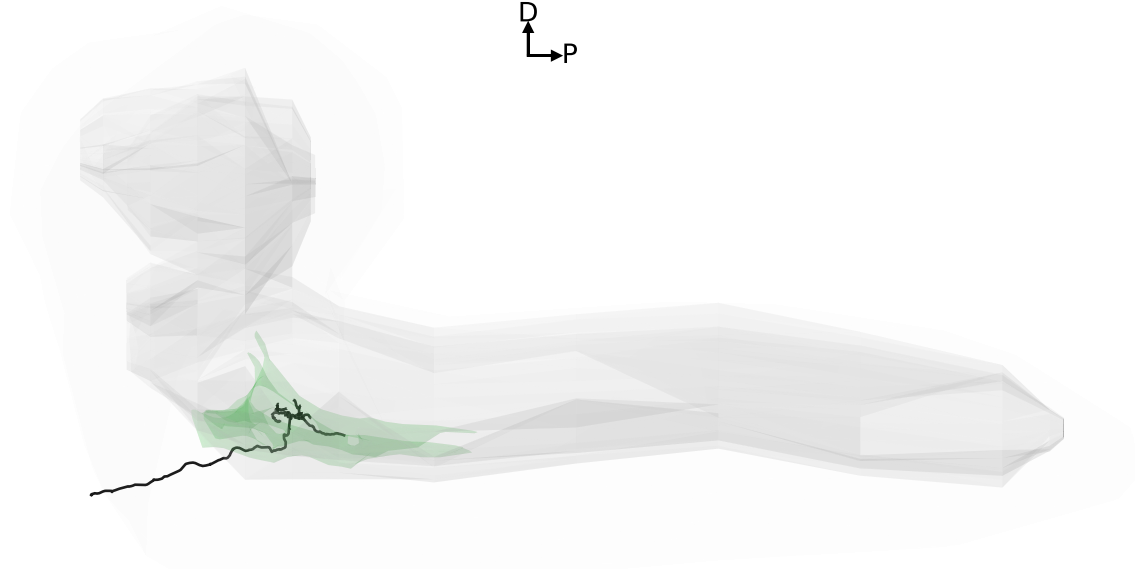

| <i>ID</i> | <i>name</i>        | SCACa | SCAVa | SCAVp | SCACal | SCACp | SCACpl | SCVM | IPCs | DMS | DH44 | Se0ens | Se0ph | PMN LR | MN motor neurons | PaN motor neurons | olfactory PNs | gustatory PNs | multiglomerular PNs | unknown PNs | thermo PNs | visual PNs |
|-----------|--------------------|-------|-------|-------|--------|-------|--------|------|------|-----|------|--------|-------|--------|------------------|-------------------|---------------|---------------|---------------------|-------------|------------|------------|
| 15640724  | MN-R-Sens-B3-VM-11 | 0     | 0     | 0     | 0      | 0     | 0      | 4    | 0    | 0   | 0    | 0      | 0     | 0      | 0                | 1                 | 0             | 0             | 0                   | 0           | 0          | 0          |





ID: 15914721  
 name: MN-R-Sens-B3-VM-14

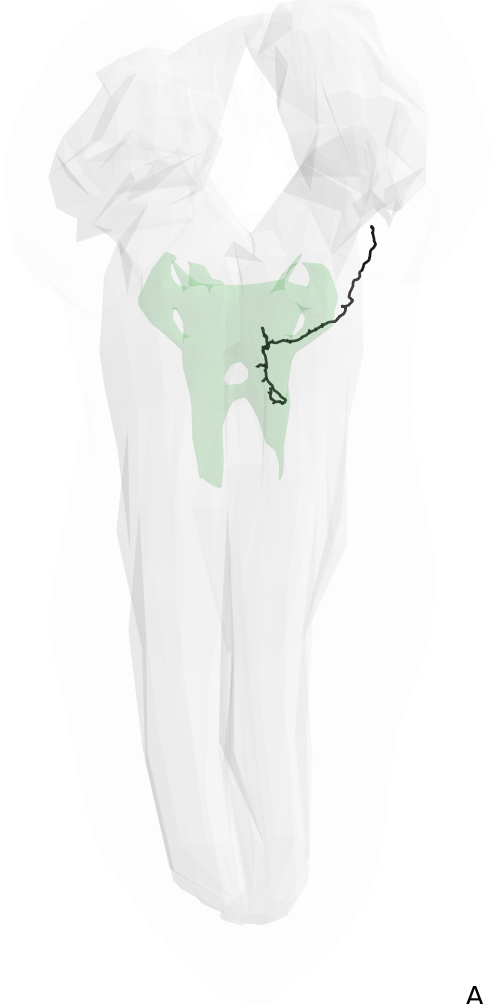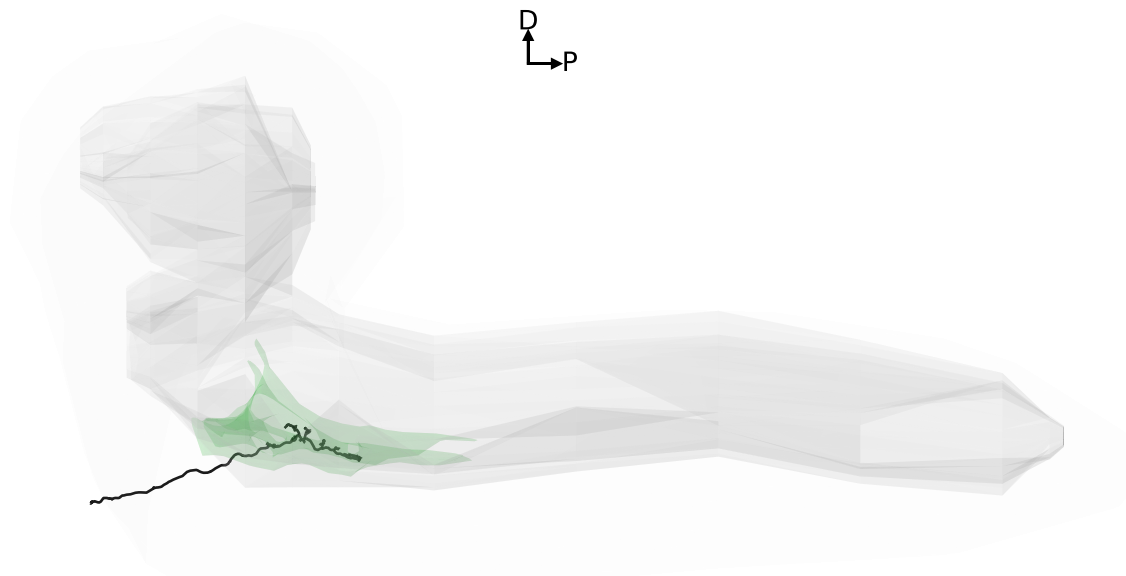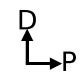

| <i>ID</i> | <i>name</i>        | SCACa | SCAVa | SCAVp | SCACal | SCACp | SCACpl | SCVM | IPCs | DMS | DH44 | Se0ens | Se0ph | PMN LR | MN motor neurons | PaN motor neurons | olfactory PNs | gustatory PNs | multiglomerular PNs | unknown PNs | thermo PNs | visual PNs |
|-----------|--------------------|-------|-------|-------|--------|-------|--------|------|------|-----|------|--------|-------|--------|------------------|-------------------|---------------|---------------|---------------------|-------------|------------|------------|
| 15914721  | MN-R-Sens-B3-VM-14 | 0     | 0     | 0     | 0      | 0     | 0      | 5    | 0    | 0   | 0    | 0      | 0     | 0      | 0                | 2                 | 0             | 0             | 0                   | 0           | 0          | 0          |

ID: 2495308  
 name: PaN-L-Sens-B1-VM-01

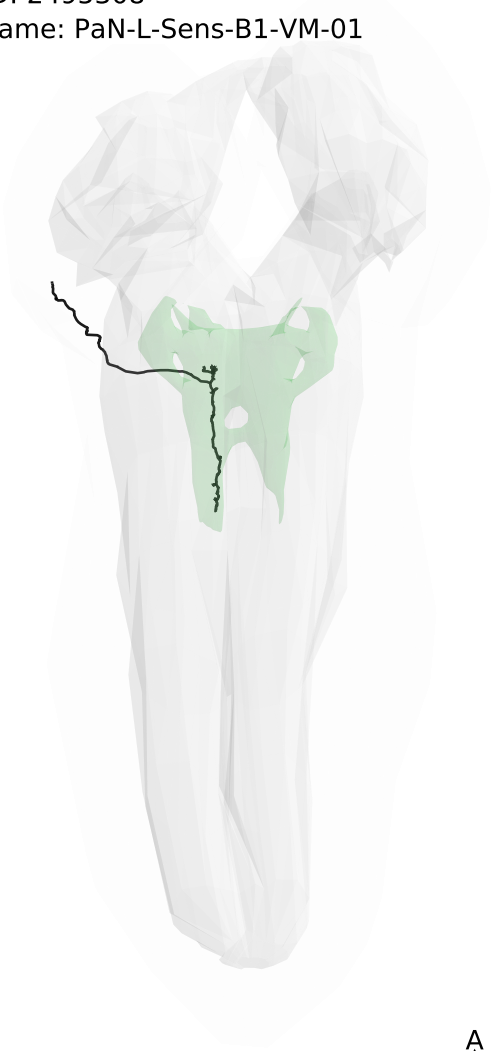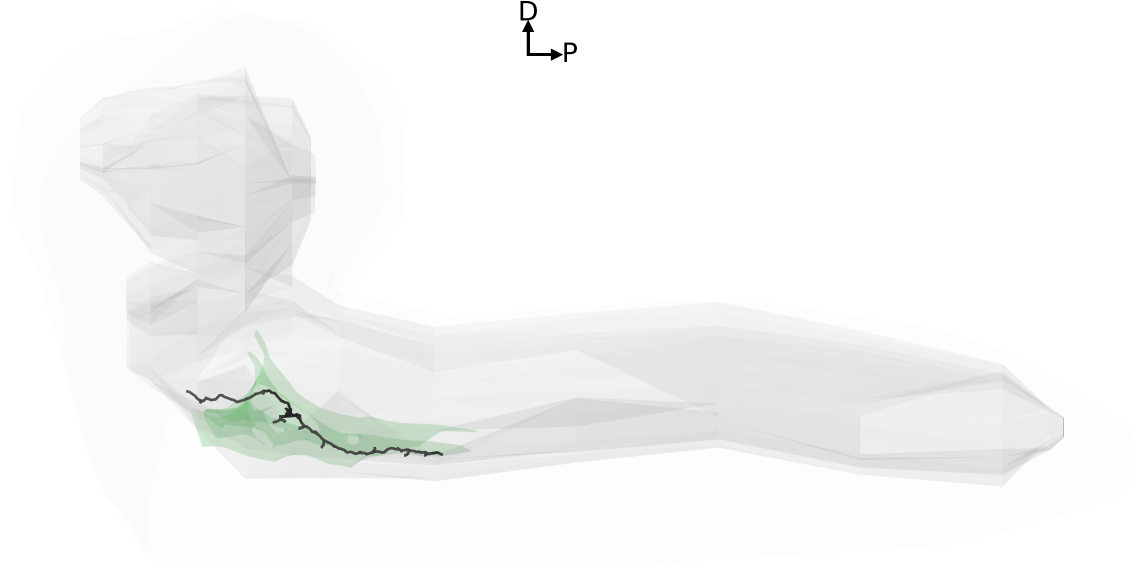

| <i>ID</i> | <i>name</i>         | SCACa | SCAVa | SCAVp | SCACal | SCACp | SCACpl | SCVM | IPCs | DMS | DH44 | Se0ens | Se0ph | PMN LR | MN motor neurons | PaN motor neurons | olfactory PNs | gustatory PNs | multiglomerular PNs | unknown PNs | thermo PNs | visual PNs |
|-----------|---------------------|-------|-------|-------|--------|-------|--------|------|------|-----|------|--------|-------|--------|------------------|-------------------|---------------|---------------|---------------------|-------------|------------|------------|
| 2495308   | PaN-L-Sens-B1-VM-01 | 0     | 0     | 0     | 0      | 0     | 0      | 3    | 0    | 0   | 0    | 0      | 0     | 0      | 1                | 0                 | 0             | 0             | 0                   | 0           | 0          | 0          |











ID: 2268281  
 name: PaN-R-Sens-B1-VM-02

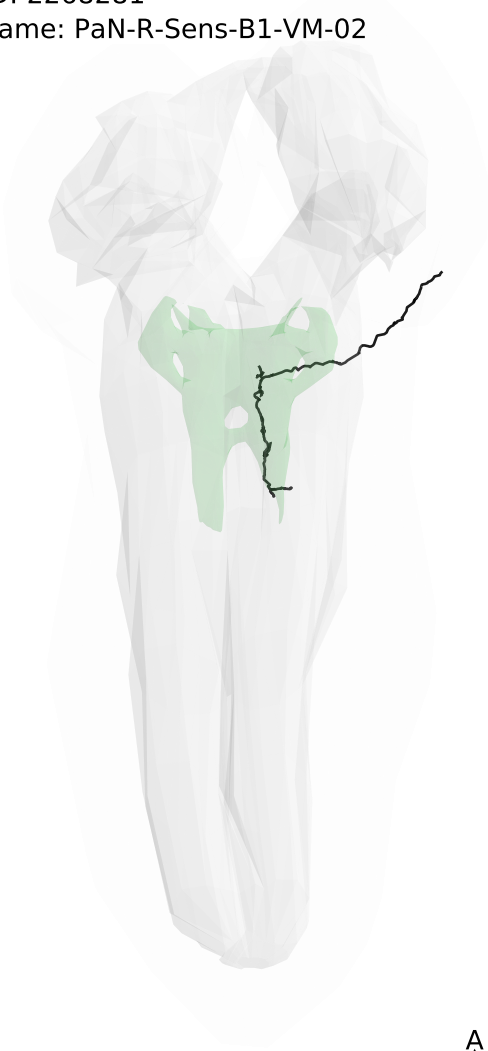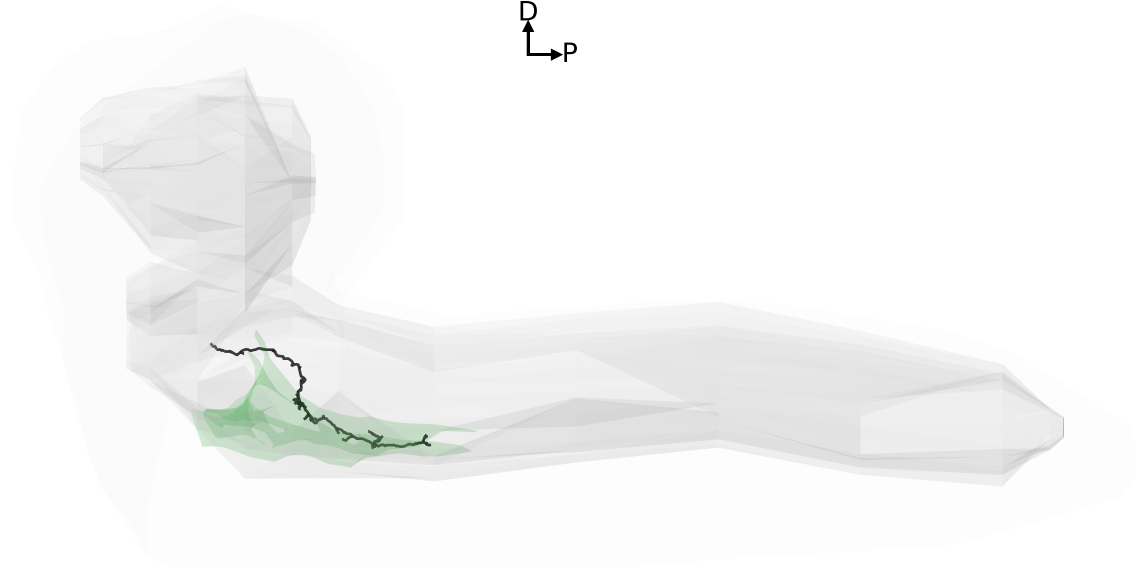

| <i>ID</i> | <i>name</i>         | SCACa | SCAVa | SCAVp | SCACal | SCACp | SCACpl | SCVM | IPCs | DMS | DH44 | Se0ens | Se0ph | PMN LR | MN motor neurons | PaN motor neurons | olfactory PNs | gustatory PNs | multiglomerular PNs | unknown PNs | thermo PNs | visual PNs |
|-----------|---------------------|-------|-------|-------|--------|-------|--------|------|------|-----|------|--------|-------|--------|------------------|-------------------|---------------|---------------|---------------------|-------------|------------|------------|
| 2268281   | PaN-R-Sens-B1-VM-02 | 0     | 0     | 0     | 0      | 0     | 0      | 7    | 0    | 0   | 0    | 0      | 0     | 0      | 6                | 2                 | 0             | 0             | 0                   | 0           | 0          | 0          |







































ID: 407869  
 name: AN-L-motor-08

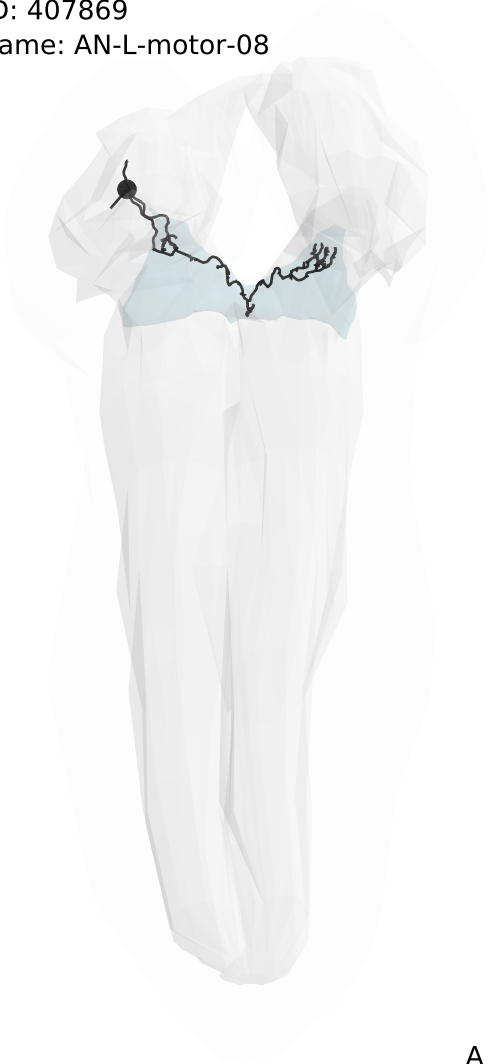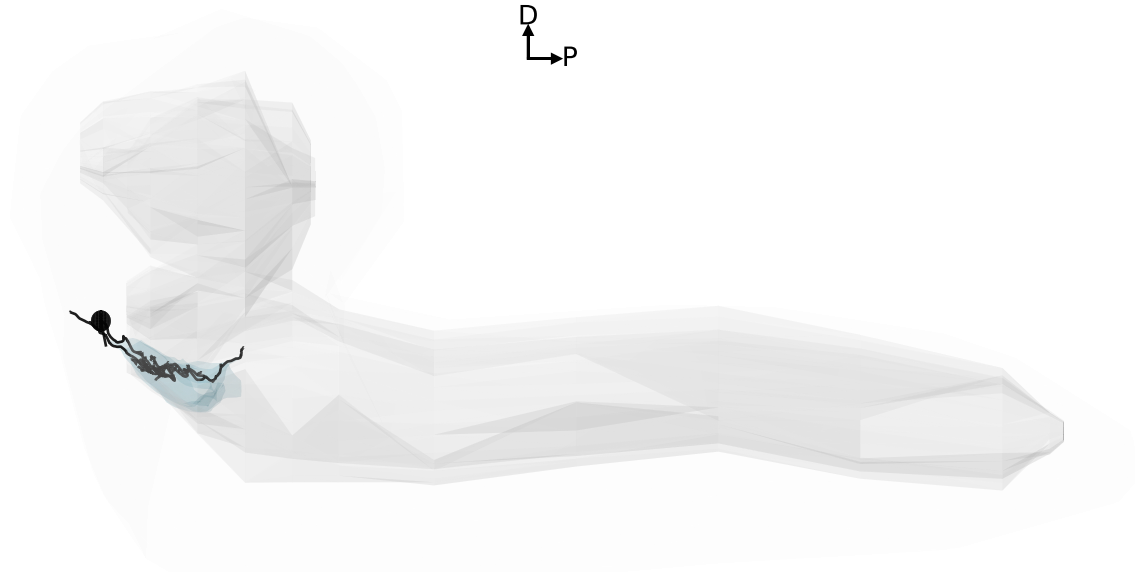

| <i>ID</i> | <i>name</i>   | SCACa | SCAVa | SCAVp | SCACal | SCACp | SCACpl | SCVM | IPCs | DMS | DH44 | Se0ens | Se0ph | PMN LR | MN motor neurons | PaN motor neurons | olfactory PNs | gustatory PNs | multiglomerular PNs | unknown PNs | thermo PNs | visual PNs |
|-----------|---------------|-------|-------|-------|--------|-------|--------|------|------|-----|------|--------|-------|--------|------------------|-------------------|---------------|---------------|---------------------|-------------|------------|------------|
| 407869    | AN-L-motor-08 | 0     | 0     | 0     | 0      | 0     | 0      | 0    | 0    | 0   | 0    | 0      | 0     | 0      | 0                | 0                 | 0             | 0             | 0                   | 0           | 0          | 0          |

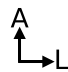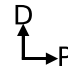

















ID: 15770867  
name: AN-L-motor-16

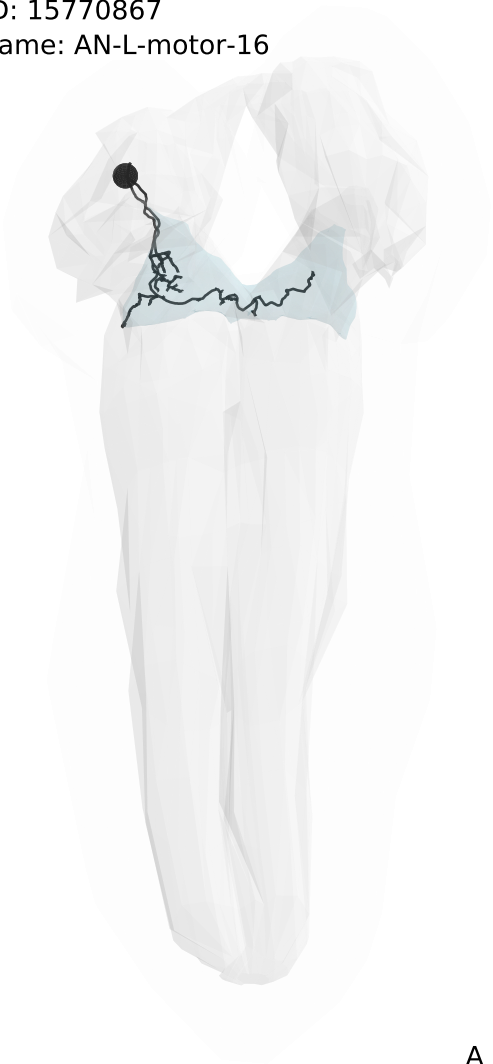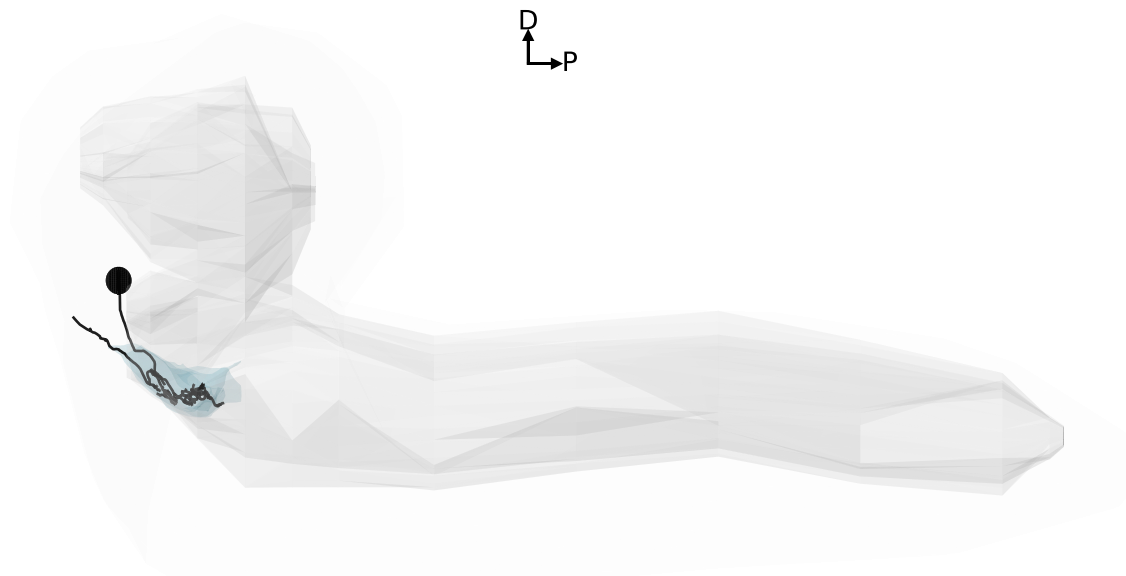

| <i>ID</i> | <i>name</i>   | SCACa | SCAVa | SCAVp | SCACal | SCACp | SCACpl | SCVM | IPCs | DMS | DH44 | Se0ens | Se0ph | PMN LR | MN motor neurons | PaN motor neurons | olfactory PNs | gustatory PNs | multiglomerular PNs | unknown PNs | thermo PNs | visual PNs |
|-----------|---------------|-------|-------|-------|--------|-------|--------|------|------|-----|------|--------|-------|--------|------------------|-------------------|---------------|---------------|---------------------|-------------|------------|------------|
| 15770867  | AN-L-motor-16 | 0     | 0     | 0     | 0      | 0     | 0      | 0    | 0    | 0   | 0    | 0      | 0     | 0      | 0                | 0                 | 0             | 0             | 0                   | 0           | 0          | 0          |























ID: 12901662  
 name: AN-R-motor-12

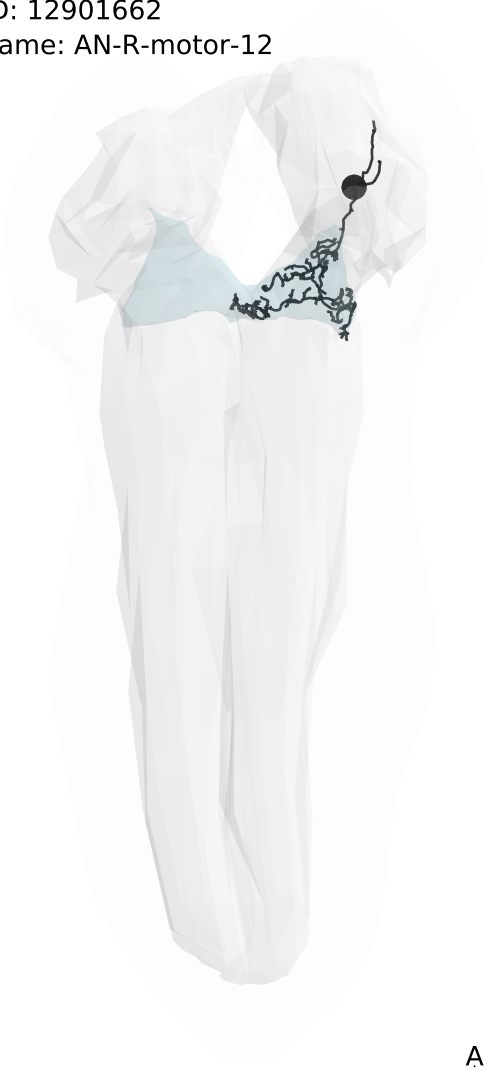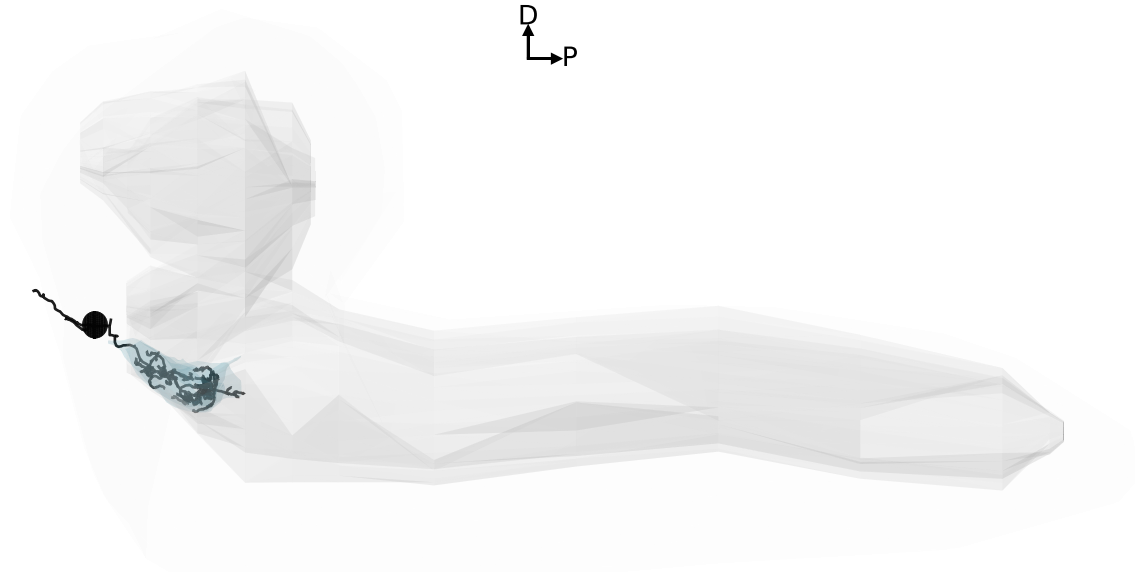

| <i>ID</i> | <i>name</i>   | SCACa | SCAVa | SCAVp | SCACal | SCACp | SCACpl | SCVM | IPCs | DMS | DH44 | Se0ens | Se0ph | PMN LR | MN motor neurons | PaN motor neurons | olfactory PNs | gustatory PNs | multiglomerular PNs | unknown PNs | thermo PNs | visual PNs |
|-----------|---------------|-------|-------|-------|--------|-------|--------|------|------|-----|------|--------|-------|--------|------------------|-------------------|---------------|---------------|---------------------|-------------|------------|------------|
| 12901662  | AN-R-motor-12 | 0     | 0     | 0     | 0      | 0     | 0      | 0    | 0    | 0   | 0    | 0      | 0     | 41     | 2                | 0                 | 0             | 0             | 0                   | 0           | 0          | 0          |





ID: 855719  
 name: AN-R-motor-14

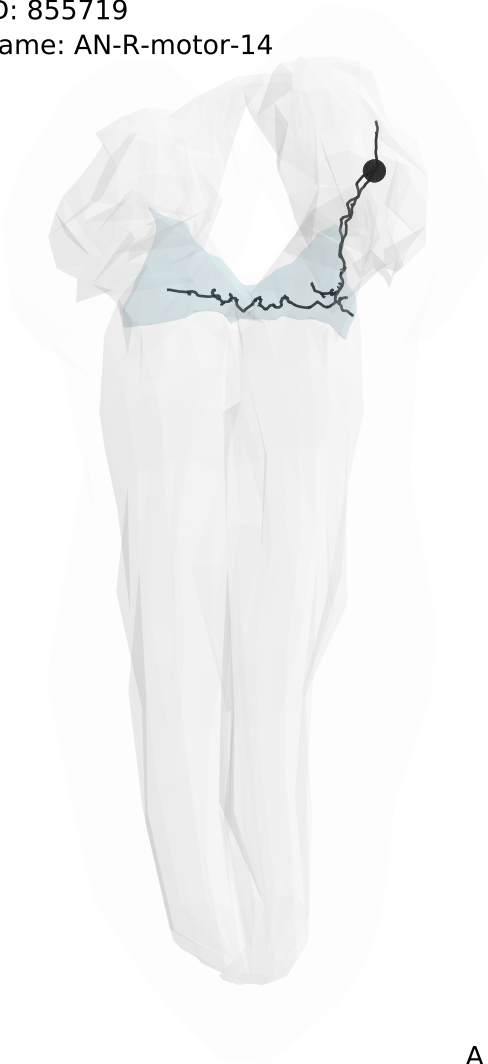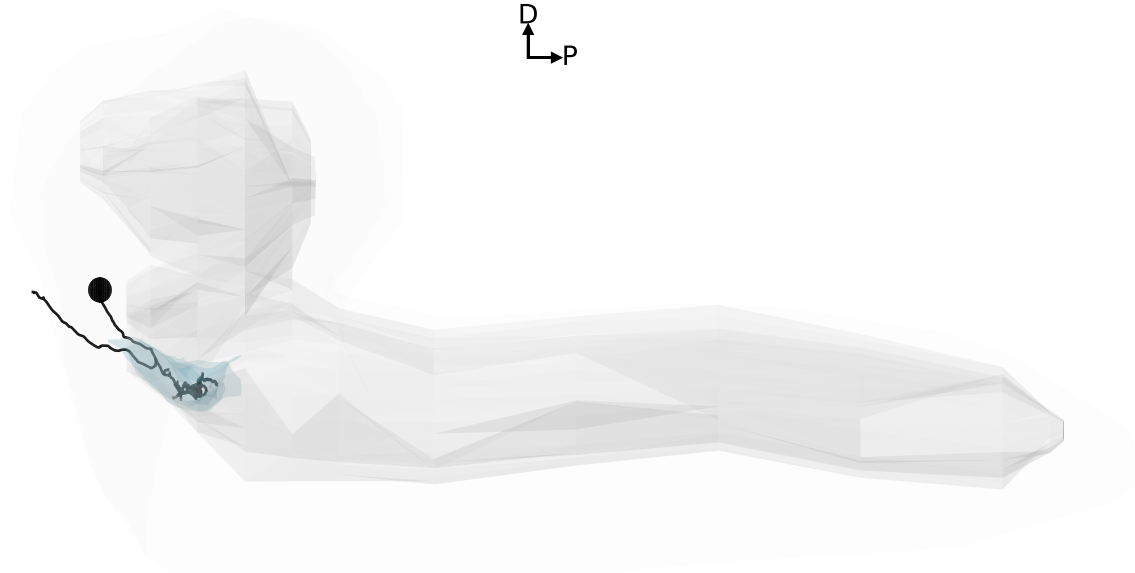

| <i>ID</i> | <i>name</i>   | SCACa | SCAVa | SCAVp | SCACal | SCACp | SCACpl | SCVM | IPCs | DMS | DH44 | Se0ens | Se0ph | PMN LR | MN motor neurons | PaN motor neurons | olfactory PNs | gustatory PNs | multiglomerular PNs | unknown PNs | thermo PNs | visual PNs |
|-----------|---------------|-------|-------|-------|--------|-------|--------|------|------|-----|------|--------|-------|--------|------------------|-------------------|---------------|---------------|---------------------|-------------|------------|------------|
| 855719    | AN-R-motor-14 | 0     | 0     | 0     | 0      | 0     | 0      | 0    | 0    | 0   | 0    | 0      | 0     | 0      | 0                | 0                 | 0             | 0             | 0                   | 0           | 0          | 0          |

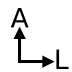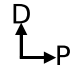











































ID: 8134938  
 name: MN-R-motor-07

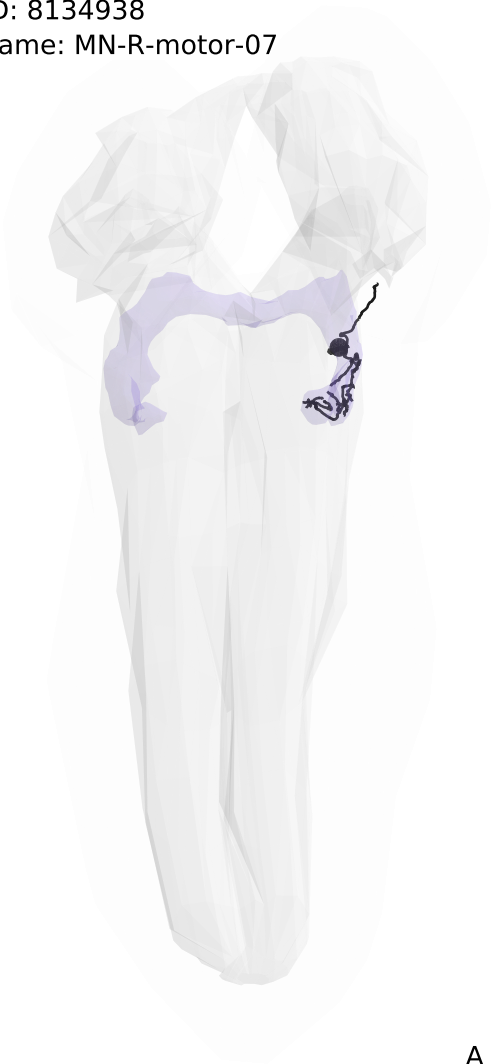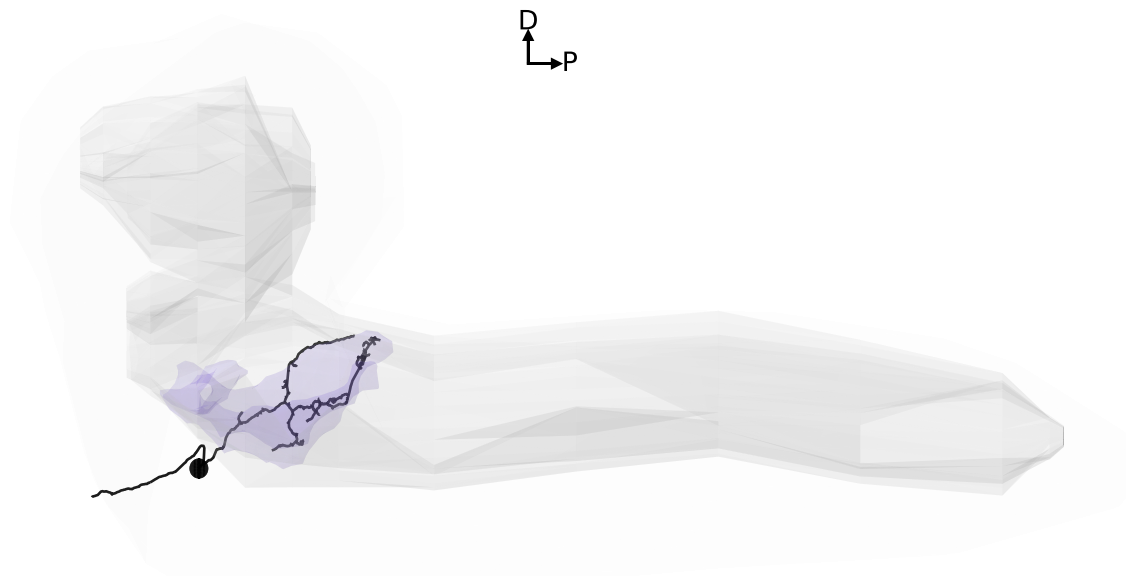

| <i>ID</i> | <i>name</i>   | SCACa | SCAVa | SCAVp | SCACal | SCACp | SCACpl | SCVM | IPCs | DMS | DH44 | Se0ens | Se0ph | PMN LR | MN motor neurons | PaN motor neurons | olfactory PNs | gustatory PNs | multiglomerular PNs | unknown PNs | thermo PNs | visual PNs |
|-----------|---------------|-------|-------|-------|--------|-------|--------|------|------|-----|------|--------|-------|--------|------------------|-------------------|---------------|---------------|---------------------|-------------|------------|------------|
| 8134938   | MN-R-motor-07 | 0     | 0     | 0     | 0      | 0     | 0      | 0    | 0    | 0   | 0    | 0      | 0     | 0      | 0                | 0                 | 0             | 0             | 0                   | 0           | 0          | 0          |

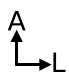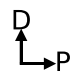







ID: 2391092  
 name: PaN-L-motor-01

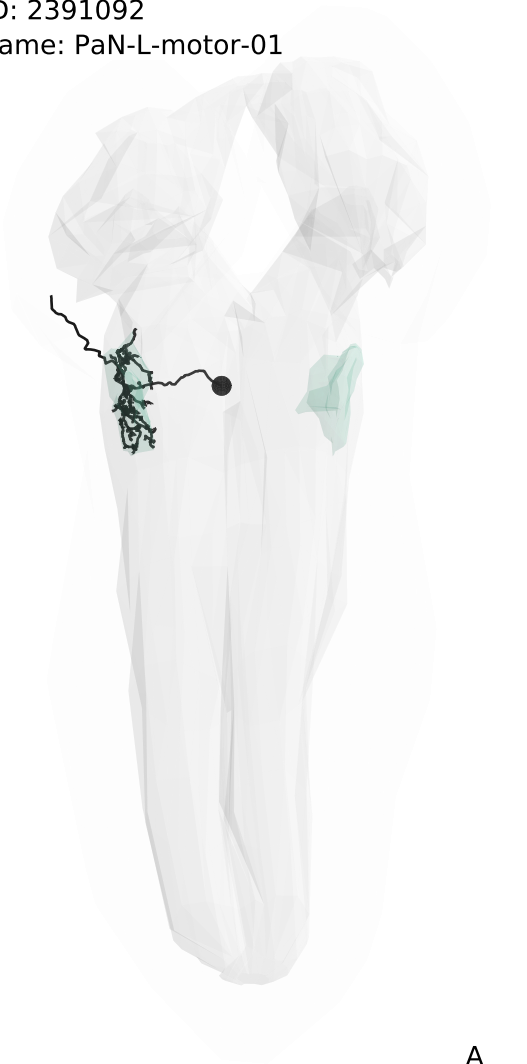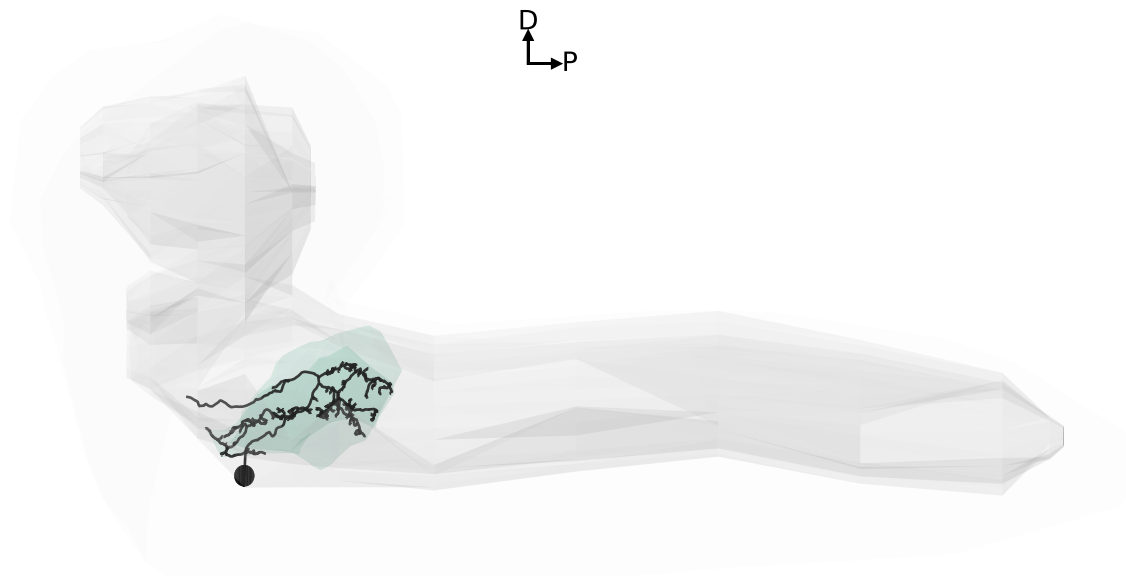

| <i>ID</i> | <i>name</i>    | SCACa | SCAVa | SCAVp | SCACal | SCACp | SCACpl | SCVM | IPCs | DMS | DH44 | Se0ens | Se0ph | PMN LR | MN motor neurons | PaN motor neurons | olfactory PNs | gustatory PNs | multiglomerular PNs | unknown PNs | thermo PNs | visual PNs |
|-----------|----------------|-------|-------|-------|--------|-------|--------|------|------|-----|------|--------|-------|--------|------------------|-------------------|---------------|---------------|---------------------|-------------|------------|------------|
| 2391092   | PaN-L-motor-01 | 0     | 0     | 0     | 0      | 0     | 0      | 0    | 0    | 0   | 0    | 0      | 0     | 0      | 1                | 0                 | 0             | 0             | 0                   | 0           | 0          | 0          |
